# Supplementary material
Source: PubMed Central journal article supplement (PMC5105896)
Supplement: JB.00545-16_zjb999094237so1.pdf [file JB.00545-16_zjb999094237so1.pdf]

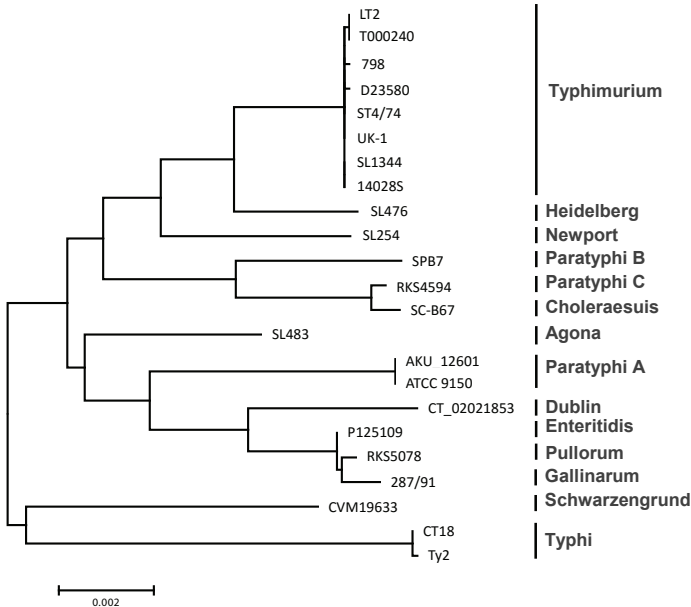

**Fig.S1.** Maximum likelihood tree of concatenated sequences of seven housekeeping genes from 8 Typhimurium and 15 other *S. enterica* subsp. I strains. The housekeeping genes (*aroC*, *dnaN*, *hemD*, *hisD*, *purE*, *sucA* and *thrA*) used in multi-locus sequence typing (MLST) were selected for the analysis.

**A**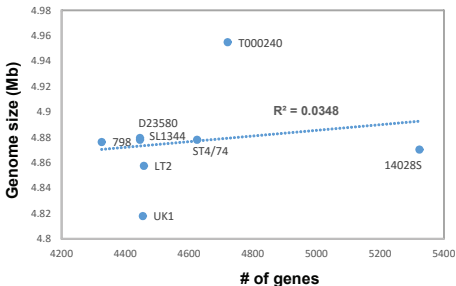**B**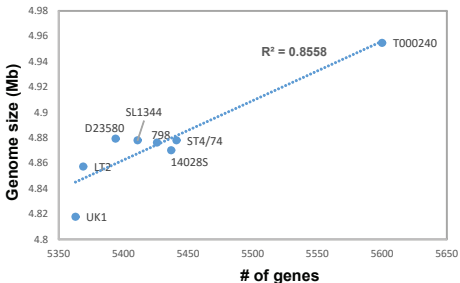

**Fig.S2.** Correlation among the genome size and the number of protein-coding genes in 8 Typhimurium strains, using (A) existing annotation, and (B) re-annotation. The blue dotted lines depict linear fit, and the  $R^2$  value for each fit is shown.

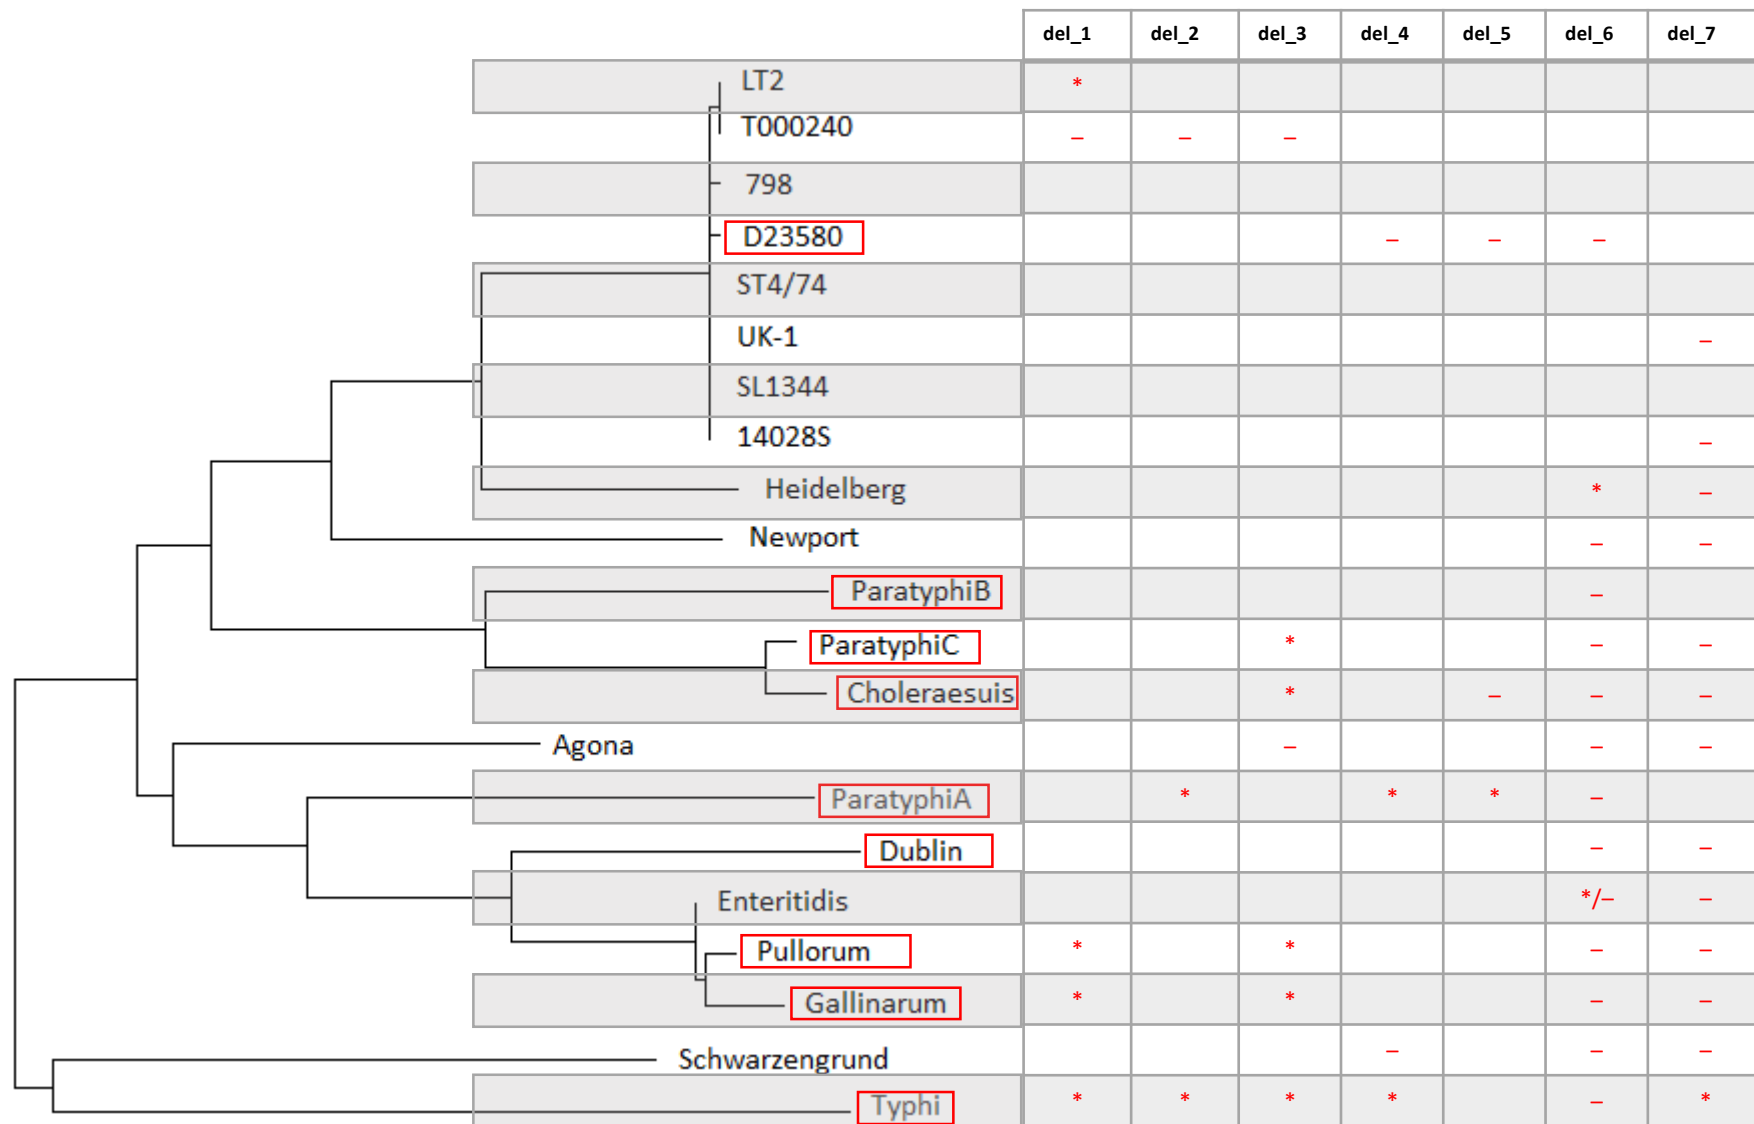

Fig.S3. Distribution of 7 mosaic deleted regions in other *S. enterica* subsp. I strains considered in Fig.S1. The human invasive strains are marked by red rectangular boxes. In a particular genome, the genes absent or carrying pre-mature stop codons are marked by “-” or “\*”, respectively.

Table S1. List of re-annotated genes in 8 Typhimurium strains analyzed.

| Genome name | Gene Name      | Reference details |        |                 |                                      | Gene annotated in 14028S |        |             |
|-------------|----------------|-------------------|--------|-----------------|--------------------------------------|--------------------------|--------|-------------|
|             |                | GI                | Strand | CDS-region      | Product                              | Coordinate               | Strand | Length (bp) |
| ST474       | STM474_0083    | 379699298         | -      | 92031-92228     | hypothetical protein                 | 92740-92937              | -      | 198         |
| ST474       | STM474_0114    | 379699329         | +      | 128578-128724   | hypothetical protein                 | 129287-129433            | +      | 147         |
| ST474       | STM474_0115    | 379699330         | +      | 128926-129039   | hypothetical protein                 | 129635-129748            | +      | 114         |
| LT2         | STM04630       | 409994397         | -      | 139338-139487   | hypothetical protein                 | 140050-140199            | -      | 150         |
| D23580      | STMMW_02971    | 378443738         | +      | 336610-336873   | hypothetical protein                 | 337324-337587            | +      | 264         |
| LT2         | STM04655       | 409994398         | -      | 339629-339871   | hypothetical protein                 | 340314-340556            | -      | 243         |
| ST474       | STM474_0312    | 379699516         | +      | 341562-341681   | hypothetical protein                 | 342769-342888            | +      | 120         |
| D23580      | STMMW_03133    | 378443750         | +      | 348247-348378   | putative transposase                 | 348961-349092            | +      | 132         |
| UK1         | STMUK_0331     | 378987726         | +      | 369132-369353   | putative inner membrane protein      | 369843-370064            | +      | 222         |
| T000240     | STMDT12_C04560 | 378982997         | +      | 482933-483049   | hypothetical protein                 | 445581-445697            | +      | 117         |
| ST474       | STM474_0431    | 379699631         | +      | 466787-466939   | hypothetical protein                 | 467994-468146            | +      | 153         |
| ST474       | STM474_0464    | 379699664         | -      | 497880-498002   | hypothetical protein                 | 499087-499209            | -      | 123         |
| T000240     | STMDT12_C07050 | 378983246         | -      | 742985-743125   | hypothetical protein                 | 705428-705568            | -      | 141         |
| T000240     | STMDT12_C07730 | 378983314         | -      | 820062-820163   | hypothetical protein                 | 781729-781830            | -      | 102         |
| ST474       | STM474_0763    | 379699951         | +      | 807598-807723   | hypothetical protein                 | 808684-808809            | +      | 126         |
| ST474       | STM474_0764    | 379699952         | -      | 808597-808710   | hypothetical protein                 | 809683-809796            | -      | 114         |
| ST474       | STM474_0818    | 379700001         | +      | 857893-858006   | hypothetical protein                 | 858979-859092            | +      | 114         |
| ST474       | STM474_0999    | 379700176         | +      | 1061436-1061582 | hypothetical protein                 | 1063228-1063374          | +      | 147         |
| ST474       | STM474_1001    | 379700178         | +      | 1061983-1062096 | hypothetical protein                 | 1063775-1063888          | +      | 114         |
| 140285      | STM14_3197     | 378451364         | +      | 2811771-2811908 | hypothetical protein                 | 1073076-1073213          | -      | 138         |
| D23580      | STMMW_10422    | 378444470         | +      | 1114868-1115074 | prophage protein                     | 1077351-1077557          | +      | 207         |
| ST474       | STM474_1045    | 379700222         | -      | 1098511-1098666 | hypothetical protein                 | 1100534-1100689          | +      | 156         |
| T000240     | STMDT12_C11030 | 378983644         | +      | 1169756-1169860 | hypothetical protein                 | 1130415-1130519          | +      | 105         |
| 140285      | STM14_3174     | 378451342         | -      | 2792931-2793668 | tail assembly protein K-like protein | 1321462-1322199          | +      | 738         |
| ST474       | STM474_1893    | 379701046         | -      | 1920052-1920177 | arsenical pump membrane protein      | 1330396-1330521          | +      | 126         |
| LT2         | STM05040       | 409994415         | -      | 1327664-1327867 | hypothetical protein                 | 1337639-1337842          | -      | 204         |
| ST474       | STM474_1249    | 379700419         | -      | 1291877-1292050 | hypothetical protein                 | 1344999-1345172          | -      | 174         |
| ST474       | STM474_1289    | 379700457         | +      | 1320526-1320669 | hypothetical protein                 | 1373649-1373792          | +      | 144         |
| ST474       | STM474_1315    | 379700483         | +      | 1347752-1347886 | hypothetical protein                 | 1400875-1401009          | +      | 135         |
| ST474       | STM474_1353    | 379700521         | +      | 1384122-1384307 | hypothetical protein                 | 1437245-1437430          | +      | 186         |
| ST474       | STM474_1383    | 379700550         | -      | 1418471-1418587 | hypothetical protein                 | 1471595-1471711          | -      | 117         |
| ST474       | STM474_1395    | 379700562         | +      | 1431868-1432002 | hypothetical protein                 | 1484992-1485126          | +      | 135         |
| T000240     | STMDT12_C14990 | 378984040         | -      | 1560231-1560323 | hypothetical protein                 | 1572520-1572612          | +      | 93          |
| ST474       | STM474_1518    | 379700677         | -      | 1542834-1542947 | hypothetical protein                 | 1595958-1596071          | -      | 114         |
| T000240     | STMDT12_C15310 | 378984072         | -      | 1591761-1591856 | hypothetical protein                 | 1604048-1604143          | -      | 96          |
| UK1         | STMUK_1520     | 378988892         | +      | 1587048-1587440 | hypothetical protein                 | 1638857-1639249          | +      | 393         |
| UK1         | STMUK_1521     | 378988893         | +      | 1587577-1587705 | hypothetical protein                 | 1639386-1639514          | +      | 129         |
| ST474       | STM474_1578    | 379700736         | -      | 1602385-1602519 | hypothetical protein                 | 1655509-1655643          | -      | 135         |
| T000240     | STMDT12_C16480 | 378984189         | -      | 1717552-1717677 | hypothetical protein                 | 1729838-1729963          | -      | 126         |
| ST474       | STM474_1641    | 379700799         | +      | 1676859-1677014 | hypothetical protein                 | 1729983-1730138          | +      | 156         |
| T000240     | STMDT12_C16570 | 378984198         | -      | 1726118-1726213 | hypothetical protein                 | 1738404-1738499          | -      | 96          |
| T000240     | STMDT12_C16740 | 378984215         | -      | 1744637-1744789 | hypothetical protein                 | 1756923-1757075          | -      | 153         |
| ST474       | ymia           | 379700885         | -      | 1764839-1764967 | hypothetical protein                 | 1818675-1818803          | -      | 129         |
| T000240     | STMDT12_C18620 | 378984403         | -      | 1934900-1935001 | hypothetical protein                 | 1948960-1949061          | -      | 102         |
| ST474       | STM474_1877    | 379701031         | -      | 1908925-1909098 | hypothetical protein                 | 1962762-1962935          | -      | 174         |
| D23580      | STMMW_18461    | 378445260         | +      | 1947071-1947241 | hypothetical protein                 | 1965246-1965416          | +      | 171         |
| ST474       | STM474_1884    | 379701038         | -      | 1913724-1913852 | hypothetical protein                 | 1967561-1967689          | -      | 129         |
| T000240     | STMDT12_C19080 | 378984449         | +      | 1972383-1972478 | hypothetical protein                 | 1988247-1988342          | +      | 96          |
| D23580      | STMMW_19262    | 378445334         | +      | 2022476-2022553 | hypothetical protein                 | 2050371-2050448          | -      | 78          |
| ST474       | STM474_2026    | 379701174         | +      | 2034563-2034694 | hypothetical protein                 | 2088400-2088531          | +      | 132         |
| D23580      | STMMW_20121    | 378445417         | +      | 2090064-2090498 | phage protein                        | 2117960-2118394          | +      | 435         |
| T000240     | STMDT12_C20240 | 378984565         | -      | 2079358-2079462 | hypothetical protein                 | 2135368-2135472          | -      | 105         |
| SL1344      | SL1344_1980    | 378699918         | +      | 2082737-2083009 | hypothetical protein                 | 2136573-2136845          | +      | 273         |
| ST474       | STM474_2085    | 379701227         | -      | 2082744-2082878 | hypothetical protein                 | 2136580-2136714          | -      | 135         |
| ST474       | STM474_2089    | 379701231         | +      | 2088148-2088282 | hypothetical protein                 | 2141984-2142118          | +      | 135         |
| 798         | UMN798_2172    | 383496723         | +      | 2087536-2087634 | hypothetical protein                 | 2142011-2142109          | -      | 99          |
| T000240     | STMDT12_C20320 | 378984573         | +      | 2086418-2086567 | hypothetical protein                 | 2142428-2142577          | +      | 150         |
| ST474       | STM474_2091    | 379701233         | +      | 2088820-2088942 | hypothetical protein                 | 2142656-2142778          | +      | 123         |
| D23580      | STMMW_20421    | 378445447         | +      | 2116462-2116623 | hypothetical protein                 | 2144358-2144519          | +      | 162         |
| ST474       | STM474_2254    | 379701393         | +      | 2258581-2258763 | hypothetical protein                 | 2312418-2312600          | +      | 183         |
| ST474       | STM474_2293    | 379701432         | -      | 2300273-2300395 | hypothetical protein                 | 2354110-2354232          | -      | 123         |
| UK1         | STMUK_2237     | 378989594         | -      | 2307167-2307274 | hypothetical protein                 | 2358975-2359082          | -      | 108         |
| T000240     | STMDT12_C22520 | 378984793         | -      | 2327280-2327405 | hypothetical protein                 | 2383290-2383415          | -      | 126         |
| ST474       | STM474_2412    | 379701547         | -      | 2421293-2421412 | hypothetical protein                 | 2475129-2475248          | -      | 120         |
| T000240     | STMDT12_C24200 | 378984961         | +      | 2507125-2507337 | hypothetical protein                 | 2563134-2563346          | +      | 213         |
| T000240     | STMDT12_C25240 | 378985065         | +      | 2617191-2617382 | putative cytoplasmic protein         | 2673319-2673510          | +      | 192         |
| ST474       | STM474_2618    | 379701745         | +      | 2646222-2646344 | hypothetical protein                 | 2700058-2700180          | +      | 123         |
| ST474       | STM474_2636    | 379701763         | +      | 2671480-2671593 | hypothetical protein                 | 2725316-2725429          | +      | 114         |
| ST474       | STM474_2692    | 379701819         | -      | 2729509-2729628 | integrase, catalytic region          | 2783351-2783470          | -      | 120         |
| SL1344      | SL1344_2548    | 378700486         | -      | 2730253-2730318 | bacteriophage protein                | 2784095-2784160          | -      | 66          |
| D23580      | STMMW_26031    | 378446002         | -      | 2757050-2757262 | putative prophage protein            | 2784223-2784435          | -      | 213         |
| ST474       | STM474_2898    | 379702018         | -      | 2927700-2927858 | hypothetical protein                 | 2925359-2925517          | -      | 159         |
| T000240     | STMDT12_C28220 | 378985362         | -      | 2935935-2936111 | hypothetical protein                 | 2932604-2932780          | -      | 177         |
| D23580      | STMMW_27451    | 378446140         | -      | 2919280-2919612 | putative inner membrane protein      | 2946530-2946862          | -      | 333         |
| D23580      | STMMW_28661    | 378446261         | +      | 3039872-3039979 | pathogenicity island 1 protein       | 3067121-3067228          | +      | 108         |
| ST474       | STM474_3077    | 379702190         | +      | 3100048-3100164 | hypothetical protein                 | 3098212-3098328          | +      | 117         |
| ST474       | STM474_3093    | 379702206         | +      | 3116333-3116446 | hypothetical protein                 | 3114497-3114610          | +      | 114         |
| D23580      | STMMW_29721    | 378446366         | -      | 3162322-3162468 | hypothetical protein                 | 3190121-3190267          | -      | 147         |
| T000240     | STMDT12_C30880 | 378985628         | +      | 3219618-3219734 | hypothetical protein                 | 3215494-3215610          | +      | 117         |
| ST474       | STM474_3231    | 379702341         | +      | 3267369-3267485 | putative racemase                    | 3265788-3265904          | +      | 117         |
| T000240     | STMDT12_C31860 | 378985726         | +      | 3314720-3314875 | hypothetical protein                 | 3309709-3309864          | +      | 156         |

|         |                |           |   |                 |                              |                 |   |     |
|---------|----------------|-----------|---|-----------------|------------------------------|-----------------|---|-----|
| ST474   | STM474_3301    | 379702409 | - | 3334473-3334658 | hypothetical protein         | 3332021-3332206 | - | 186 |
| ST474   | STM474_3318    | 379702426 | - | 3348584-3348700 | hypothetical protein         | 3346132-3346248 | - | 117 |
| ST474   | STM474_3334    | 379702442 | - | 3364546-3364662 | hypothetical protein         | 3362094-3362210 | - | 117 |
| T000240 | STMDT12_C32520 | 378985792 | + | 3381047-3381148 | hypothetical protein         | 3376036-3376137 | + | 102 |
| ST474   | STM474_3403    | 379702507 | + | 3435178-3435297 | hypothetical protein         | 3432726-3432845 | + | 120 |
| T000240 | STMDT12_C34190 | 378985959 | + | 3551875-3551970 | hypothetical protein         | 3542510-3542605 | + | 96  |
| ST474   | STM474_3527    | 379702628 | - | 3554690-3554815 | hypothetical protein         | 3547169-3547294 | - | 126 |
| T000240 | STMDT12_C34520 | 378985992 | - | 3595480-3595632 | hypothetical protein         | 3586074-3586226 | - | 153 |
| ST474   | STM474_3611    | 379702705 | + | 3620933-3621070 | hypothetical protein         | 3613309-3613446 | + | 138 |
| SL1344  | SL1344_3427    | 378701354 | + | 3633385-3633606 | hypothetical protein         | 3625761-3625982 | + | 222 |
| ST474   | STM474_3868    | 379702957 | - | 3911348-3911467 | hypothetical protein         | 3903724-3903843 | - | 120 |
| T000240 | STMDT12_C38190 | 378986359 | - | 3984324-3984416 | hypothetical protein         | 3975120-3975212 | - | 93  |
| ST474   | STM474_3981    | 379703066 | - | 4028417-4028551 | hypothetical protein         | 4020795-4020929 | - | 135 |
| ST474   | STM474_3986    | 379703070 | - | 4031907-4032026 | hypothetical protein         | 4024285-4024404 | - | 120 |
| ST474   | STM474_4022    | 379703106 | - | 4071364-4071624 | hypothetical protein         | 4063742-4064002 | - | 261 |
| T000240 | STMDT12_C40060 | 378986546 | - | 4156200-4156427 | hypothetical protein         | 4064781-4065008 | - | 228 |
| ST474   | STM474_4144    | 379703214 | + | 4193636-4193764 | hypothetical protein         | 4185781-4185909 | + | 129 |
| ST474   | STM474_4210    | 379703274 | - | 4263051-4263284 | hypothetical protein         | 4255196-4255429 | - | 234 |
| ST474   | STM474_4231    | 379703295 | + | 4283542-4283655 | hypothetical protein         | 4275687-4275800 | + | 114 |
| ST474   | STM474_4282    | 379703346 | + | 4329998-4330159 | hypothetical protein         | 4322144-4322305 | + | 162 |
| T000240 | STMDT12_C43680 | 378986908 | + | 4559620-4559715 | hypothetical protein         | 4468073-4468168 | + | 96  |
| ST474   | STM474_4451    | 379703497 | + | 4498500-4498640 | hypothetical protein         | 4490749-4490889 | + | 141 |
| SL1344  | SL1344_4256    | 378702162 | - | 4584964-4585098 | hypothetical protein         | 4577214-4577348 | - | 135 |
| ST474   | STM474_4515    | 379703561 | - | 4585588-4585743 | hypothetical protein         | 4577837-4577992 | - | 156 |
| ST474   | STM474_4516    | 379703562 | - | 4586025-4586150 | hypothetical protein         | 4578274-4578399 | - | 126 |
| ST474   | STM474_4616    | 379703657 | + | 4681690-4681806 | hypothetical protein         | 4673938-4674054 | + | 117 |
| ST474   | STM474_4627    | 379703668 | - | 4695124-4695237 | hypothetical protein         | 4687373-4687486 | - | 114 |
| ST474   | STM474_4653    | 379703693 | + | 4719860-4719991 | hypothetical protein         | 4712109-4712240 | + | 132 |
| UK1     | STMUK_4448     | 378991724 | + | 4665460-4665600 | putative cytoplasmic protein | 4717855-4717995 | + | 141 |
| T000240 | STMDT12_C45910 | 378987131 | + | 4803005-4803103 | hypothetical protein         | 4718456-4718554 | + | 99  |
| T000240 | STMDT12_C46080 | 378987148 | + | 4822036-4822131 | hypothetical protein         | 4737487-4737582 | + | 96  |
| ST474   | STM474_4722    | 379703761 | - | 4794952-4795101 | hypothetical protein         | 4787201-4787350 | - | 150 |
| ST474   | smp            | 379703819 | + | 4853656-4853805 | phosphoserine phosphatase    | 4845908-4846057 | + | 150 |

| Genome name | Gene Name   | GI        | Reference details |               |                                          | Gene annotated in D23580 |        |             |
|-------------|-------------|-----------|-------------------|---------------|------------------------------------------|--------------------------|--------|-------------|
|             |             |           | Strand            | CDS-region    | Product                                  | Coordinate               | Strand | Length (bp) |
| 14028S      | STM14_0012  | 378448286 | +                 | 11257-11424   | hypothetical protein                     | 11257-11424              | +      | 168         |
| 14028S      | STM14_0015  | 378448289 | +                 | 14845-14958   | hypothetical protein                     | 14845-14958              | +      | 114         |
| 14028S      | STM14_0020  | 378448294 | -                 | 17613-17741   | hypothetical protein                     | 17613-17741              | -      | 129         |
| 14028S      | STM14_0021  | 378448295 | +                 | 17665-17787   | hypothetical protein                     | 17665-17787              | +      | 123         |
| 14028S      | STM14_0024  | 378448298 | +                 | 23091-23240   | hypothetical protein                     | 23091-23240              | +      | 150         |
| 14028S      | STM14_0026  | 378448300 | -                 | 24094-24198   | hypothetical protein                     | 24094-24198              | -      | 105         |
| 14028S      | STM14_0027  | 378448301 | +                 | 24316-24426   | hypothetical protein                     | 24316-24426              | +      | 111         |
| 14028S      | STM14_0040  | 378448314 | +                 | 34828-34974   | hypothetical protein                     | 34828-34974              | +      | 147         |
| 14028S      | STM14_0057  | 378448331 | +                 | 57203-57334   | hypothetical protein                     | 57203-57334              | +      | 132         |
| 14028S      | STM14_0068  | 378448342 | -                 | 68513-68671   | hypothetical protein                     | 68513-68671              | -      | 159         |
| 14028S      | STM14_0076  | 378448350 | -                 | 74964-75239   | hypothetical protein                     | 74964-75239              | -      | 276         |
| 14028S      | STM14_0089  | 378448363 | +                 | 89119-89328   | hypothetical protein                     | 88408-88617              | +      | 210         |
| ST474       | STM474_0083 | 379699298 | -                 | 92031-92228   | hypothetical protein                     | 92029-92226              | -      | 198         |
| 14028S      | STM14_0097  | 378448371 | -                 | 95263-95379   | hypothetical protein                     | 94552-94668              | -      | 117         |
| 14028S      | STM14_0102  | 378448376 | +                 | 98738-99019   | hypothetical protein                     | 98027-98308              | +      | 282         |
| 14028S      | STM14_0105  | 378448379 | -                 | 101349-101474 | hypothetical protein                     | 100638-100763            | -      | 126         |
| 14028S      | STM14_0113  | 378448387 | -                 | 108892-109053 | hypothetical protein                     | 108181-108342            | -      | 162         |
| 14028S      | STM14_0128  | 378448402 | -                 | 127427-127546 | putative lipoprotein                     | 126716-126835            | -      | 120         |
| 14028S      | STM14_0130  | 378448404 | -                 | 129166-129492 | hypothetical protein                     | 128455-128781            | -      | 327         |
| ST474       | STM474_0114 | 379699329 | +                 | 128578-128724 | hypothetical protein                     | 128576-128722            | +      | 147         |
| ST474       | STM474_0115 | 379699330 | +                 | 128926-129039 | hypothetical protein                     | 128924-129037            | +      | 114         |
| 14028S      | STM14_0136  | 378448410 | -                 | 134689-134793 | hypothetical protein                     | 133978-134082            | -      | 105         |
| 14028S      | STM14_0137  | 378448411 | +                 | 135067-135210 | hypothetical protein                     | 134356-134499            | +      | 144         |
| 14028S      | STM14_0141  | 378448415 | -                 | 138755-138877 | hypothetical protein                     | 138044-138166            | -      | 123         |
| LT2         | STM04630    | 409994397 | -                 | 139338-139487 | hypothetical protein                     | 139339-139488            | -      | 150         |
| 14028S      | STM14_0143  | 378448417 | -                 | 140204-140338 | hypothetical protein                     | 139493-139627            | -      | 135         |
| 14028S      | STM14_0144  | 378448418 | +                 | 140496-140633 | hypothetical protein                     | 139785-139922            | +      | 138         |
| 14028S      | STM14_0165  | 378448438 | +                 | 162875-162979 | LysR family transcriptional regulator    | 162164-162268            | +      | 105         |
| 14028S      | STM14_0173  | 378448446 | -                 | 168890-169072 | hypothetical protein                     | 168179-168361            | -      | 183         |
| 14028S      | STM14_0179  | 378448452 | -                 | 173962-174090 | hypothetical protein                     | 173251-173379            | -      | 129         |
| 14028S      | STM14_0181  | 378448454 | +                 | 175672-175794 | hypothetical protein                     | 174961-175083            | +      | 123         |
| 14028S      | STM14_0186  | 378448459 | +                 | 183222-183350 | hypothetical protein                     | 182511-182639            | +      | 129         |
| 14028S      | STM14_0210  | 378448482 | -                 | 209796-209966 | hypothetical protein                     | 209085-209255            | -      | 171         |
| 14028S      | STM14_0215  | 378448487 | -                 | 213058-213171 | hypothetical protein                     | 212347-212460            | -      | 114         |
| 14028S      | STM14_0224  | 378448496 | +                 | 221426-221587 | hypothetical protein                     | 220715-220876            | +      | 162         |
| 14028S      | STM14_0225  | 378448497 | -                 | 221522-221629 | hypothetical protein                     | 220811-220918            | -      | 108         |
| 14028S      | STM14_0227  | 378448499 | -                 | 224289-224429 | hypothetical protein                     | 223578-223718            | -      | 141         |
| 14028S      | STM14_0232  | 378448504 | +                 | 230459-230665 | hypothetical protein                     | 229748-229954            | +      | 207         |
| 14028S      | STM14_0233  | 378448505 | +                 | 231001-231144 | hypothetical protein                     | 230290-230433            | +      | 144         |
| 14028S      | STM14_0242  | 378448514 | +                 | 239222-239365 | hypothetical protein                     | 238510-238653            | +      | 144         |
| 14028S      | STM14_0256  | 378448527 | +                 | 254799-255083 | 30S ribosomal protein S2                 | 254086-254370            | +      | 285         |
| 14028S      | STM14_0262  | 378448533 | +                 | 259830-260033 | hypothetical protein                     | 259117-259320            | +      | 204         |
| 14028S      | yaeD        | 378448560 | +                 | 288944-289510 | D,D-heptose 1,7-bisphosphate phosphatase | 288231-288797            | +      | 567         |
| 14028S      | STM14_0292  | 378448562 | -                 | 289616-289819 | hypothetical protein                     | 288903-289106            | -      | 204         |
| 14028S      | STM14_0310  | 378448574 | -                 | 304859-304966 | hypothetical protein                     | 304146-304253            | -      | 108         |
| 14028S      | STM14_0312  | 378448575 | +                 | 305167-305274 | hypothetical protein                     | 304453-304560            | +      | 108         |
| 14028S      | STM14_0337  | 378448600 | +                 | 330303-330512 | hypothetical protein                     | 329589-329798            | +      | 210         |
| 14028S      | STM14_0344  | 378448607 | +                 | 339345-339485 | hypothetical protein                     | 338631-338771            | +      | 141         |
| LT2         | STM04655    | 409994398 | -                 | 339629-339871 | hypothetical protein                     | 339600-339842            | -      | 243         |
| ST474       | STM474_0312 | 379699516 | +                 | 341562-341681 | hypothetical protein                     | 342055-342174            | +      | 120         |
| 14028S      | STM14_0361  | 378448621 | -                 | 351322-351450 | hypothetical protein                     | 350608-350736            | -      | 129         |
| 14028S      | STM14_0377  | 378448636 | -                 | 366783-366935 | hypothetical protein                     | 366609-366221            | -      | 153         |
| T000240     | STM04655    | 378982903 | +                 | 385663-385842 | hypothetical protein                     | 385844-386023            | +      | 180         |
| UK1         | STMUK_0331  | 378987726 | +                 | 369132-369353 | putative inner membrane protein          | 409654-409875            | +      | 222         |
| 14028S      | STM14_0397  | 378448654 | -                 | 385733-385843 | hypothetical protein                     | 425544-425654            | -      | 111         |
| 14028S      | STM14_0403  | 378448660 | -                 | 390802-390939 | hypothetical protein                     | 430613-430750            | -      | 138         |
| 14028S      | STM14_0411  | 378448668 | +                 | 399120-399233 | hypothetical protein                     | 438931-439044            | +      | 114         |
| 14028S      | STM14_0415  | 378448672 | +                 | 402243-402422 | putative metal-binding transport protein | 442054-442233            | +      | 180         |
| 14028S      | STM14_0419  | 378448676 | +                 | 409084-409218 | hypothetical protein                     | 448895-449029            | +      | 135         |
| 14028S      | STM14_0420  | 378448677 | -                 | 409118-409237 | hypothetical protein                     | 448929-449048            | -      | 120         |
| 14028S      | STM14_0430  | 378448687 | +                 | 418467-418640 | hypothetical protein                     | 458278-458451            | +      | 174         |
| 14028S      | STM14_0436  | 378448693 | +                 | 425565-425684 | hypothetical protein                     | 465376-465495            | +      | 120         |
| 14028S      | STM14_0437  | 378448694 | -                 | 425675-425827 | hypothetical protein                     | 465486-465638            | -      | 153         |
| 14028S      | STM14_0441  | 378448698 | -                 | 430751-430909 | hypothetical protein                     | 470562-470720            | -      | 159         |
| 14028S      | STM14_0442  | 378448699 | +                 | 430925-431059 | hypothetical protein                     | 470736-470870            | +      | 135         |
| 14028S      | STM14_0446  | 378448703 | +                 | 433714-433827 | hypothetical protein                     | 473525-473638            | +      | 114         |
| 14028S      | STM14_0451  | 378448708 | +                 | 437620-437742 | hypothetical protein                     | 477431-477553            | +      | 123         |
| 14028S      | STM14_0453  | 378448710 | -                 | 438082-438243 | hypothetical protein                     | 477893-478054            | -      | 162         |
| 14028S      | STM14_0457  | 378448714 | +                 | 440792-440941 | hypothetical protein                     | 480603-480752            | +      | 150         |
| 14028S      | STM14_0464  | 378448721 | -                 | 444556-444687 | hypothetical protein                     | 484367-484498            | -      | 132         |
| T000240     | STM04655    | 378982997 | +                 | 482933-483049 | hypothetical protein                     | 485392-485508            | +      | 117         |
| 14028S      | STM14_0472  | 378448729 | -                 | 453755-453904 | hypothetical protein                     | 493565-493714            | -      | 150         |
| 14028S      | STM14_0479  | 378448736 | +                 | 461340-461450 | DNA metabolism protein                   | 501150-501260            | +      | 111         |
| 14028S      | STM14_0487  | 378448744 | +                 | 467631-467846 | hypothetical protein                     | 507441-507656            | +      | 216         |
| ST474       | STM474_0431 | 379699631 | +                 | 466787-466939 | hypothetical protein                     | 507804-507956            | +      | 153         |
| 14028S      | STM14_0491  | 378448747 | +                 | 469965-470111 | hypothetical protein                     | 509775-509921            | +      | 147         |
| 14028S      | STM14_0498  | 378448754 | -                 | 473976-474284 | hypothetical protein                     | 513786-514094            | -      | 309         |
| 14028S      | STM14_0509  | 378448765 | -                 | 484792-484902 | hypothetical protein                     | 524602-524712            | -      | 111         |
| ST474       | STM474_0464 | 379699664 | -                 | 497880-498002 | hypothetical protein                     | 538897-539019            | -      | 123         |
| 14028S      | STM14_0526  | 378448781 | +                 | 501468-501653 | hypothetical protein                     | 541278-541463            | +      | 186         |
| 14028S      | STM14_0528  | 378448783 | -                 | 502053-502166 | hypothetical protein                     | 541863-541976            | -      | 114         |
| 14028S      | STM14_0531  | 378448786 | +                 | 504670-504774 | hypothetical protein                     | 544480-544584            | +      | 105         |
| 14028S      | STM14_0536  | 378448791 | -                 | 511028-511390 | hypothetical protein                     | 550838-551200            | -      | 363         |
| 14028S      | STM14_0562  | 378448816 | -                 | 535085-535210 | hypothetical protein                     | 574896-575021            | -      | 126         |
| 14028S      | STM14_0573  | 378448827 | -                 | 546597-546818 | hypothetical protein                     | 586408-586629            | -      | 222         |
| 14028S      | STM14_0575  | 378448829 | +                 | 547392-547598 | hypothetical protein                     | 587203-587409            | +      | 207         |
| 14028S      | STM14_0580  | 378448834 | +                 | 552798-552923 | hypothetical protein                     | 592609-592734            | +      | 126         |
| 14028S      | STM14_0597  | 378448851 | +                 | 570227-570331 | hypothetical protein                     | 610038-610142            | +      | 105         |
| 14028S      | STM14_0599  | 378448853 | -                 | 571546-571650 | hypothetical protein                     | 611357-611461            | -      | 105         |
| 14028S      | STM14_0633  | 378448887 | -                 | 604316-604444 | hypothetical protein                     | 642432-642560            | -      | 129         |
| 14028S      | STM14_0634  | 378448888 | +                 | 604400-604555 | hypothetical protein                     | 642516-642671            | +      | 156         |

|         |             |           |   |                 |                                               |                 |   |     |
|---------|-------------|-----------|---|-----------------|-----------------------------------------------|-----------------|---|-----|
| 140285  | STM14_0645  | 378448899 | + | 614019-614189   | hypothetical protein                          | 652135-652305   | + | 171 |
| 140285  | STM14_0647  | 378448900 | - | 614287-614475   | integrase                                     | 652403-652591   | - | 189 |
| 140285  | STM14_0649  | 378448901 | + | 615283-615441   | hypothetical protein                          | 653399-653557   | + | 159 |
| 140285  | STM14_0659  | 378448908 | - | 622266-622520   | hypothetical protein                          | 660382-660636   | - | 255 |
| 140285  | STM14_0665  | 378448914 | + | 627603-627788   | hypothetical protein                          | 665719-665904   | + | 186 |
| 140285  | STM14_0677  | 378448926 | + | 639577-639684   | hypothetical protein                          | 677693-677800   | + | 108 |
| 140285  | STM14_0683  | 378448932 | - | 644504-644635   | hypothetical protein                          | 682620-682751   | - | 132 |
| 140285  | STM14_0698  | 378448947 | + | 661861-661971   | hypothetical protein                          | 699977-700087   | + | 111 |
| 140285  | STM14_0714  | 378448963 | + | 678228-678434   | hypothetical protein                          | 716542-716748   | + | 207 |
| 140285  | STM14_0715  | 378448964 | - | 678399-678539   | hypothetical protein                          | 716713-716853   | - | 141 |
| 140285  | STM14_0726  | 378448975 | + | 688331-688513   | hypothetical protein                          | 726645-726827   | + | 183 |
| 140285  | STM14_0730  | 378448979 | + | 692333-692443   | hypothetical protein                          | 730647-730757   | + | 111 |
| 140285  | STM14_0735  | 378448984 | + | 694969-695076   | hypothetical protein                          | 733283-733390   | + | 108 |
| 140285  | STM14_0738  | 378448987 | - | 696364-696498   | hypothetical protein                          | 734678-734812   | - | 135 |
| 140285  | STM14_0740  | 378448989 | - | 697584-697727   | hypothetical protein                          | 735898-736041   | - | 144 |
| 140285  | STM14_0742  | 378448991 | + | 698354-698719   | hypothetical protein                          | 736668-737033   | + | 366 |
| 140285  | STM14_0745  | 378448994 | + | 700128-700277   | hypothetical protein                          | 738442-738591   | + | 150 |
| T000240 | STM14_0774  | 378983246 | - | 742985-743125   | hypothetical protein                          | 743742-743882   | - | 141 |
| 140285  | STM14_0774  | 378449022 | + | 730309-730596   | hypothetical protein                          | 768623-768910   | + | 288 |
| 140285  | STM14_0777  | 378449025 | - | 733102-733251   | hypothetical protein                          | 771416-771565   | - | 150 |
| 140285  | STM14_0780  | 378449028 | - | 734838-734957   | hypothetical protein                          | 773152-773271   | - | 120 |
| 140285  | STM14_0791  | 378449032 | + | 739310-739477   | hypothetical protein                          | 777624-777791   | + | 168 |
| 140285  | STM14_0797  | 378449038 | - | 745470-745595   | hypothetical protein                          | 783784-783909   | - | 126 |
| 140285  | STM14_0800  | 378449041 | + | 749621-749734   | hypothetical protein                          | 787935-788048   | + | 114 |
| 140285  | STM14_0801  | 378449042 | + | 749864-750154   | hypothetical protein                          | 788178-788468   | + | 291 |
| 140285  | STM14_0809  | 378449050 | + | 757442-757591   | hypothetical protein                          | 795756-795905   | + | 150 |
| 140285  | STM14_0812  | 378449053 | + | 758607-758720   | hypothetical protein                          | 796921-797034   | + | 114 |
| 140285  | STM14_0819  | 378449060 | - | 766193-766318   | hypothetical protein                          | 804507-804632   | - | 126 |
| 140285  | STM14_0820  | 378449061 | + | 766472-766585   | hypothetical protein                          | 804786-804899   | + | 114 |
| 140285  | STM14_0826  | 378449067 | - | 774532-774729   | K <sup>+</sup> -transporting ATPase subunit F | 812846-813043   | - | 198 |
| T000240 | STM14_0859  | 378449100 | + | 808472-808597   | hypothetical protein                          | 846785-846910   | + | 126 |
| ST474   | STM474_0763 | 379699951 | + | 807598-807723   | hypothetical protein                          | 846997-847122   | + | 126 |
| ST474   | STM474_0764 | 379699952 | - | 808597-808710   | hypothetical protein                          | 847996-848109   | - | 114 |
| 140285  | STM14_0860  | 378449101 | - | 809819-809962   | hypothetical protein                          | 848132-848275   | - | 144 |
| 140285  | STM14_0864  | 378449105 | + | 812877-813017   | hypothetical protein                          | 851190-851330   | + | 141 |
| 140285  | STM14_0873  | 378449114 | - | 818715-819254   | hypothetical protein                          | 857028-857567   | - | 540 |
| 140285  | STM14_0879  | 378449115 | - | 820227-820322   | hypothetical protein                          | 858539-858634   | - | 96  |
| 140285  | STM14_0897  | 378449132 | - | 837473-837664   | hypothetical protein                          | 875784-875975   | - | 192 |
| 140285  | STM14_0903  | 378449138 | + | 843123-843230   | hypothetical protein                          | 881434-881541   | + | 108 |
| ST474   | STM474_0818 | 379700001 | + | 857893-858006   | hypothetical protein                          | 897290-897403   | + | 114 |
| 140285  | STM14_0924  | 378449158 | + | 864209-864493   | hypothetical protein                          | 902520-902804   | + | 285 |
| 140285  | STM14_0925  | 378449159 | + | 864550-864777   | hypothetical protein                          | 902861-903088   | + | 228 |
| 140285  | STM14_946   | 378449180 | - | 881747-881884   | hypothetical protein                          | 919347-919484   | - | 138 |
| 140285  | STM14_952   | 378449186 | - | 888006-888110   | hypothetical protein                          | 925606-925710   | - | 105 |
| 140285  | STM14_956   | 378449190 | + | 891948-892067   | hypothetical protein                          | 929548-929667   | + | 120 |
| 140285  | STM14_958   | 378449192 | - | 892325-892444   | hypothetical protein                          | 929925-930044   | - | 120 |
| 140285  | STM14_961   | 378449195 | + | 895674-895811   | hypothetical protein                          | 933274-933411   | + | 138 |
| 140285  | STM14_965   | 378449199 | - | 898059-898181   | hypothetical protein                          | 935659-935781   | - | 123 |
| 140285  | STM14_967   | 378449201 | - | 899158-899316   | hypothetical protein                          | 936758-936916   | - | 159 |
| 140285  | STM14_969   | 378449203 | - | 900254-900415   | hypothetical protein                          | 937854-938015   | - | 162 |
| 140285  | STM14_970   | 378449204 | - | 900375-900506   | hypothetical protein                          | 937975-938106   | - | 132 |
| 140285  | STM14_973   | 378449207 | + | 902910-903080   | hypothetical protein                          | 940506-940676   | + | 171 |
| 140285  | STM14_974   | 378449208 | - | 903009-903137   | hypothetical protein                          | 940605-940733   | - | 129 |
| 140285  | STM14_0363  | 378448623 | - | 352120-352227   | hypothetical protein                          | 945393-945500   | - | 108 |
| 140285  | STM14_982   | 378449216 | + | 911396-911509   | hypothetical protein                          | 948992-949105   | + | 114 |
| 140285  | STM14_986   | 378449220 | - | 915878-916033   | hypothetical protein                          | 953474-953629   | - | 156 |
| 140285  | STM14_989   | 378449223 | + | 917997-918137   | hypothetical protein                          | 955593-955733   | + | 141 |
| 140285  | STM14_995   | 378449229 | - | 924480-924599   | hypothetical protein                          | 962076-962195   | - | 120 |
| 140285  | STM14_997   | 378449231 | + | 925933-926067   | hypothetical protein                          | 963529-963663   | + | 135 |
| 140285  | STM14_999   | 378449233 | + | 926622-926762   | hypothetical protein                          | 964218-964358   | + | 141 |
| 140285  | STM14_1000  | 378449234 | + | 926970-927134   | hypothetical protein                          | 964566-964730   | + | 165 |
| 140285  | STM14_1006  | 378449239 | - | 931103-931243   | hypothetical protein                          | 968699-968839   | - | 141 |
| 140285  | STM14_1010  | 378449243 | + | 934780-934917   | hypothetical protein                          | 972376-972513   | + | 138 |
| 140285  | STM14_1019  | 378449251 | + | 942902-943027   | hypothetical protein                          | 980498-980623   | + | 126 |
| 140285  | STM14_1034  | 378449266 | + | 955378-955569   | hypothetical protein                          | 992974-993165   | + | 192 |
| 140285  | STM14_1038  | 378449270 | - | 958765-958895   | hypothetical protein                          | 996361-996561   | - | 201 |
| 140285  | STM14_1053  | 378449285 | + | 972908-973111   | hypothetical protein                          | 1010489-1010692 | + | 204 |
| 140285  | STM14_1055  | 378449287 | + | 973986-974153   | hypothetical protein                          | 1011567-1011734 | + | 168 |
| 140285  | STM14_1060  | 378449292 | - | 980013-980138   | hypothetical protein                          | 1017592-1017717 | - | 126 |
| 140285  | STM14_1061  | 378449293 | + | 980033-980176   | hypothetical protein                          | 1017612-1017755 | + | 144 |
| 140285  | STM14_1067  | 378449299 | - | 984062-984343   | hypothetical protein                          | 1021641-1021922 | - | 282 |
| 140285  | STM14_1081  | 378449312 | - | 994689-994946   | hypothetical protein                          | 1032268-1032525 | - | 258 |
| 140285  | STM14_1082  | 378449313 | - | 994867-995142   | hypothetical protein                          | 1032446-1032721 | - | 276 |
| 140285  | STM14_1087  | 378449318 | + | 1001941-1002111 | hypothetical protein                          | 1039520-1039690 | + | 171 |
| 140285  | STM14_1092  | 378449323 | + | 1007647-1007754 | hypothetical protein                          | 1045226-1045333 | + | 108 |
| 140285  | STM14_1093  | 378449324 | - | 1007837-1007968 | hypothetical protein                          | 1045416-1045547 | - | 132 |
| 140285  | STM14_1102  | 378449333 | + | 1018831-1018959 | hypothetical protein                          | 1056410-1056538 | + | 129 |
| 140285  | STM14_1104  | 378449335 | + | 1019641-1019754 | hypothetical protein                          | 1057220-1057333 | + | 114 |
| 140285  | STM14_1108  | 378449339 | - | 1023127-1023381 | hypothetical protein                          | 1060706-1060960 | - | 255 |
| 140285  | STM14_1118  | 378449349 | - | 1033792-1033944 | hypothetical protein                          | 1071371-1071523 | - | 153 |
| 140285  | STM14_1129  | 378449360 | - | 1047995-1048126 | hypothetical protein                          | 1085574-1085705 | - | 132 |
| 140285  | STM14_1131  | 378449362 | + | 1049521-1049673 | hypothetical protein                          | 1087100-1087252 | + | 153 |
| 140285  | STM14_1133  | 378449364 | - | 1051307-1051426 | hypothetical protein                          | 1088886-1089005 | - | 120 |
| 140285  | STM14_1135  | 378449366 | - | 1051897-1052118 | hypothetical protein                          | 1089476-1089697 | - | 222 |
| 140285  | STM14_1137  | 378449368 | + | 1053504-1053662 | hypothetical protein                          | 1091083-1091241 | + | 159 |
| ST474   | STM474_0999 | 379700176 | + | 1061436-1061582 | hypothetical protein                          | 1100807-1100953 | + | 147 |
| ST474   | STM474_1001 | 379700178 | + | 1061983-1062096 | hypothetical protein                          | 1101354-1101467 | + | 114 |
| 140285  | STM14_1149  | 378449380 | + | 1063939-1064178 | hypothetical protein                          | 1101518-1101757 | + | 240 |
| 140285  | STM14_1157  | 378449388 | + | 1068009-1068230 | hypothetical protein                          | 1105527-1105748 | + | 222 |
| 140285  | STM14_1159  | 378449390 | + | 1068921-1069121 | hypothetical protein                          | 1106439-1106639 | + | 201 |
| 140285  | STM14_1197  | 378451364 | + | 2811771-2811908 | hypothetical protein                          | 1110593-1110730 | - | 138 |
| 140285  | STM14_1189  | 378449420 | + | 1094525-1094767 | hypothetical protein                          | 1132042-1132284 | + | 243 |

|         |             |           |   |                 |                                                       |                 |   |     |
|---------|-------------|-----------|---|-----------------|-------------------------------------------------------|-----------------|---|-----|
| ST474   | STM474_1045 | 379700222 | + | 1098511-1098666 | hypothetical protein                                  | 1138879-1139034 | + | 156 |
| 140285  | STM14_1201  | 378449431 | - | 1106320-1106445 | hypothetical protein                                  | 1144665-1144790 | - | 126 |
| 140285  | STM14_1209  | 378449439 | - | 1115818-1116021 | hypothetical protein                                  | 1154164-1154367 | - | 204 |
| 140285  | STM14_1216  | 378449446 | - | 1121248-1121352 | hypothetical protein                                  | 1159594-1159698 | - | 105 |
| T000240 | STM14_1234  | 378449463 | + | 1135671-1135796 | hypothetical protein                                  | 1174016-1174141 | + | 126 |
| 140285  | STM14_1244  | 378449473 | - | 1143230-1143337 | hypothetical protein                                  | 1180853-1180960 | - | 108 |
| 140285  | STM14_1245  | 378449474 | + | 1143361-1143543 | hypothetical protein                                  | 1180984-1181166 | + | 183 |
| 140285  | STM14_1249  | 378449478 | - | 1146275-1146388 | hypothetical protein                                  | 1183898-1184011 | - | 114 |
| 140285  | STM14_1254  | 378449483 | - | 1150549-1150701 | hypothetical protein                                  | 1188172-1188324 | - | 153 |
| 140285  | STM14_1260  | 378449489 | - | 1155618-1155782 | hypothetical protein                                  | 1193241-1193405 | - | 165 |
| 140285  | STM14_1262  | 378449491 | + | 1156832-1156987 | hypothetical protein                                  | 1194455-1194610 | + | 156 |
| 140285  | STM14_1273  | 378449502 | + | 1164294-1164521 | hypothetical protein                                  | 1201917-1202144 | + | 228 |
| 140285  | STM14_1279  | 378449506 | - | 1170030-1170278 | hypothetical protein                                  | 1207653-1207901 | - | 249 |
| 140285  | STM14_1280  | 378449507 | - | 1170167-1170286 | hypothetical protein                                  | 1207790-1207909 | - | 120 |
| 140285  | STM14_1282  | 378449509 | + | 1172347-1172457 | hypothetical protein                                  | 1209970-1210080 | + | 111 |
| 140285  | STM14_1283  | 378449510 | + | 1172451-1172747 | hypothetical protein                                  | 1210074-1210370 | + | 297 |
| 140285  | STM14_1286  | 378449512 | + | 1174679-1174783 | hypothetical protein                                  | 1212302-1212406 | + | 105 |
| 140285  | STM14_1288  | 378449514 | + | 1176314-1176421 | hypothetical protein                                  | 1213937-1214044 | + | 108 |
| 140285  | STM14_1289  | 378449515 | - | 1176396-1176605 | hypothetical protein                                  | 1214019-1214228 | - | 210 |
| 140285  | STM14_1291  | 378449517 | - | 1177413-1177520 | hypothetical protein                                  | 1215036-1215143 | - | 108 |
| 140285  | STM14_1292  | 378449518 | + | 1177573-1177704 | hypothetical protein                                  | 1215196-1215327 | + | 132 |
| 140285  | STM14_1298  | 378449523 | - | 1183064-1183228 | hypothetical protein                                  | 1220687-1220851 | - | 165 |
| 140285  | STM14_1307  | 378449532 | - | 1188559-1188696 | hypothetical protein                                  | 1226194-1226331 | - | 138 |
| 140285  | STM14_1308  | 378449533 | - | 1188894-1189040 | hypothetical protein                                  | 1226529-1226675 | - | 147 |
| 140285  | STM14_1316  | 378449541 | - | 1194339-1194509 | hypothetical protein                                  | 1231976-1232146 | - | 171 |
| 140285  | STM14_1322  | 378449547 | + | 1200601-1201062 | hypothetical protein                                  | 1238238-1238699 | + | 462 |
| 140285  | STM14_1327  | 378449552 | + | 1204177-1204380 | hypothetical protein                                  | 1241814-1242017 | + | 204 |
| 140285  | yceO        | 378449553 | - | 1204429-1204542 | putative inner membrane protein                       | 1242066-1242179 | - | 114 |
| 140285  | STM14_1339  | 378449564 | - | 1212983-1213159 | hypothetical protein                                  | 1250620-1250796 | - | 177 |
| 140285  | STM14_1344  | 378449569 | - | 1216241-1216396 | flagellar basal body P-ring biosynthesis protein FlgA | 1253878-1254033 | - | 156 |
| 140285  | STM14_1356  | 378449581 | - | 1226280-1226474 | hypothetical protein                                  | 1263917-1264111 | - | 195 |
| 140285  | STM14_1376  | 378449600 | - | 1244261-1244398 | hypothetical protein                                  | 1281898-1282035 | - | 138 |
| 140285  | STM14_1390  | 378449614 | - | 1256910-1257065 | hypothetical protein                                  | 1294547-1294702 | - | 156 |
| 140285  | STM14_1399  | 378449623 | - | 1267794-1267916 | hypothetical protein                                  | 1305431-1305553 | - | 123 |
| 140285  | STM14_1401  | 378449625 | - | 1269076-1269240 | hypothetical protein                                  | 1306713-1306877 | - | 165 |
| 140285  | STM14_1487  | 378449708 | - | 1337214-1337372 | hypothetical protein                                  | 1323750-1323908 | - | 159 |
| 140285  | STM14_1488  | 378449709 | + | 1337312-1337452 | hypothetical protein                                  | 1323848-1323988 | + | 141 |
| 140285  | STM14_1489  | 378449710 | + | 1337337-1337585 | hypothetical protein                                  | 1323873-1324121 | + | 249 |
| LT2     | STM05040    | 409994415 | - | 1327664-1327867 | hypothetical protein                                  | 1324175-1324378 | - | 204 |
| 140285  | STM14_1494  | 378449714 | - | 1340405-1340575 | hypothetical protein                                  | 1326941-1327111 | - | 171 |
| 140285  | STM14_1496  | 378449716 | - | 1341060-1341188 | hypothetical protein                                  | 1327596-1327724 | - | 129 |
| 140285  | STM14_1499  | 378449718 | + | 1341718-1341825 | hypothetical protein                                  | 1328254-1328361 | + | 108 |
| 140285  | STM14_1500  | 378449719 | - | 1342043-1342192 | hypothetical protein                                  | 1328579-1328728 | - | 150 |
| 140285  | STM14_1502  | 378449721 | - | 1342962-1343096 | hypothetical protein                                  | 1329498-1329632 | - | 135 |
| 140285  | STM14_1506  | 378449723 | - | 1344493-1344636 | hypothetical protein                                  | 1331029-1331172 | - | 144 |
| 140285  | STM14_1507  | 378449724 | + | 1344742-1344867 | putative lipoprotein                                  | 1331278-1331403 | + | 126 |
| ST474   | STM474_1249 | 379700419 | - | 1291877-1292050 | hypothetical protein                                  | 1331535-1331708 | - | 174 |
| 140285  | STM14_1510  | 378449727 | - | 1346067-1346216 | putative inner membrane protein                       | 1332603-1332752 | - | 150 |
| 140285  | STM14_1514  | 378449731 | - | 1348508-1348666 | hypothetical protein                                  | 1335044-1335202 | - | 159 |
| 140285  | STM14_1524  | 378449740 | - | 1356451-1356600 | hypothetical protein                                  | 1342987-1343136 | - | 150 |
| 140285  | STM14_1528  | 378449744 | + | 1358977-1359201 | hypothetical protein                                  | 1345513-1345737 | + | 225 |
| 140285  | STM14_1533  | 378449749 | - | 1361225-1361380 | hypothetical protein                                  | 1347761-1347916 | - | 156 |
| 140285  | STM14_1536  | 378449752 | - | 1362034-1362159 | hypothetical protein                                  | 1348570-1348695 | - | 126 |
| 140285  | STM14_1540  | 378449756 | - | 1363413-1363529 | hypothetical protein                                  | 1349949-1350065 | - | 117 |
| 140285  | STM14_1541  | 378449757 | - | 1363501-1363599 | hypothetical protein                                  | 1350037-1350135 | - | 99  |
| 140285  | STM14_1545  | 378449761 | - | 1364743-1364856 | hypothetical protein                                  | 1351279-1351392 | - | 114 |
| 140285  | STM14_1546  | 378449762 | + | 1364774-1364911 | hypothetical protein                                  | 1351310-1351447 | + | 138 |
| 140285  | STM14_1550  | 378449766 | + | 1367385-1367522 | hypothetical protein                                  | 1353921-1354058 | + | 138 |
| 140285  | STM14_1551  | 378449767 | + | 1367589-1367696 | putative inner membrane protein                       | 1354125-1354232 | + | 108 |
| 140285  | STM14_1554  | 378449770 | + | 1370048-1370245 | hypothetical protein                                  | 1356584-1356781 | + | 198 |
| 140285  | STM14_1555  | 378449771 | + | 1370136-1370267 | salivary secreted protein                             | 1356672-1356803 | + | 132 |
| 140285  | STM14_1557  | 378449773 | + | 1371682-1371801 | hypothetical protein                                  | 1358218-1358337 | + | 120 |
| ST474   | STM474_1289 | 379700457 | + | 1320526-1320669 | hypothetical protein                                  | 1360185-1360328 | + | 144 |
| 140285  | STM14_1559  | 378449775 | - | 1373854-1374027 | hypothetical protein                                  | 1360389-1360562 | - | 174 |
| 140285  | STM14_1566  | 378449782 | + | 1379655-1379795 | hypothetical protein                                  | 1366190-1366330 | + | 141 |
| 140285  | STM14_1569  | 378449785 | + | 1380898-1381002 | hypothetical protein                                  | 1367434-1367538 | + | 105 |
| 140285  | STM14_1572  | 378449788 | + | 1382785-1382889 | hypothetical protein                                  | 1369321-1369425 | + | 105 |
| 140285  | STM14_1581  | 378449797 | + | 1391859-1392038 | hypothetical protein                                  | 1378395-1378574 | + | 180 |
| 140285  | STM14_1587  | 378449803 | + | 1398234-1398449 | hypothetical protein                                  | 1384770-1384985 | + | 216 |
| ST474   | STM474_1315 | 379700483 | + | 1347752-1347886 | hypothetical protein                                  | 1387411-1387545 | + | 135 |
| 140285  | STM14_1591  | 378449807 | - | 1400923-1401129 | hypothetical protein                                  | 1387459-1387665 | - | 207 |
| 140285  | STM14_1593  | 378449809 | + | 1401610-1401732 | hypothetical protein                                  | 1388146-1388268 | + | 123 |
| 140285  | STM14_1601  | 378449817 | + | 1409372-1409509 | hypothetical protein                                  | 1395908-1396045 | + | 138 |
| 140285  | STM14_1602  | 378449818 | - | 1409399-1409647 | hypothetical protein                                  | 1395935-1396183 | - | 249 |
| 140285  | STM14_1617  | 378449833 | + | 1421769-1421954 | hypothetical protein                                  | 1408305-1408490 | + | 186 |
| 140285  | STM14_1618  | 378449834 | + | 1421956-1422090 | hypothetical protein                                  | 1408492-1408626 | + | 135 |
| 140285  | STM14_1623  | 378449839 | - | 1425398-1425562 | hypothetical protein                                  | 1411934-1412098 | - | 165 |
| 140285  | STM14_1631  | 378449847 | - | 1432577-1432696 | hypothetical protein                                  | 1419113-1419232 | - | 120 |
| 140285  | STM14_1636  | 378449852 | + | 1436467-1436571 | hypothetical protein                                  | 1423003-1423107 | + | 105 |
| ST474   | STM474_1353 | 379700521 | + | 1384122-1384307 | hypothetical protein                                  | 1423781-1423966 | + | 186 |
| 140285  | STM14_1638  | 378449854 | - | 1437586-1437699 | hypothetical protein                                  | 1424122-1424235 | - | 114 |
| 140285  | STM14_1645  | 378449861 | - | 1445506-1445658 | hypothetical protein                                  | 1432042-1432194 | - | 153 |
| 140285  | STM14_1652  | 378449868 | + | 1452598-1452744 | hypothetical protein                                  | 1439134-1439280 | + | 147 |
| 140285  | STM14_1653  | 378449869 | - | 1452728-1452838 | hypothetical protein                                  | 1439264-1439374 | - | 111 |
| 140285  | STM14_1658  | 378449873 | - | 1456308-1456475 | hypothetical protein                                  | 1442844-1443011 | - | 168 |
| 140285  | lppB        | 378449885 | - | 1469033-1469272 | putative methyl-accepting chemotaxis protein          | 1455569-1455808 | - | 240 |
| 140285  | lpp         | 378449886 | - | 1469355-1469591 | murein lipoprotein                                    | 1455891-1456127 | - | 237 |
| ST474   | STM474_1383 | 379700550 | - | 1418471-1418587 | hypothetical protein                                  | 1458131-1458247 | - | 117 |
| ST474   | STM474_1395 | 379700562 | + | 1431868-1432002 | hypothetical protein                                  | 1471528-1471662 | + | 135 |
| 140285  | STM14_1685  | 378449900 | - | 1486016-1486129 | hypothetical protein                                  | 1472552-1472665 | - | 114 |
| 140285  | STM14_1692  | 378449907 | + | 1493410-1493517 | hypothetical protein                                  | 1479946-1480053 | + | 108 |
| 140285  | STM14_1719  | 378449934 | + | 1511477-1511602 | hypothetical protein                                  | 1498013-1498138 | + | 126 |



|        |                |           |   |                 |                                                 |                 |   |     |
|--------|----------------|-----------|---|-----------------|-------------------------------------------------|-----------------|---|-----|
| 140285 | STM14_1728     | 378449941 | + | 1519171-1519452 | hypothetical protein                            | 1505707-1505988 | + | 282 |
| 140285 | STM14_1751     | 378449964 | + | 1538110-1538277 | hypothetical protein                            | 1524646-1524813 | + | 168 |
| 140285 | STM14_1761     | 410023179 | - | 1546024-1546179 | hypothetical protein                            | 1532960-1532715 | - | 156 |
| 140285 | STM14_1764     | 378449977 | + | 1548438-1548683 | hypothetical protein                            | 1534974-1535219 | + | 246 |
| 140285 | STM14_1771     | 378449982 | + | 1553745-1553906 | fumarase A                                      | 1540281-1540442 | + | 162 |
| 140285 | STM14_1776     | 378449987 | - | 1559385-1559690 | outer membrane protein                          | 1545921-1546226 | - | 306 |
| 140285 | STM14_1782     | 378449992 | - | 1563882-1564016 | putative amino acid permease                    | 1550418-1550552 | - | 135 |
| 140285 | STM14_1783     | 378449993 | - | 1563914-1564087 | hypothetical protein                            | 1550450-1550623 | - | 174 |
| 140285 | STM14_1784     | 378449994 | + | 1564099-1564224 | hypothetical protein                            | 1550635-1550760 | + | 126 |
| 140285 | STM14_1786     | 378449996 | + | 1565234-1565359 | hypothetical protein                            | 1551770-1551895 | + | 126 |
| 140285 | STM14_1790     | 378450000 | + | 1569946-1570116 | hypothetical protein                            | 1556482-1556652 | + | 171 |
| 140285 | STM14_1794     | 378450004 | - | 1571734-1572027 | hypothetical protein                            | 1558270-1558563 | - | 294 |
| 140285 | STM14_1796     | 378450006 | - | 1572462-1572653 | hypothetical protein                            | 1558998-1559189 | - | 192 |
| T00240 | STMDT12_C14990 | 378984040 | + | 1560231-1560323 | hypothetical protein                            | 1559056-1559148 | + | 93  |
| 140285 | STM14_1810     | 378450020 | - | 1586812-1587033 | putative dimethyl sulfoxide reductase subunit A | 1573348-1573569 | - | 222 |
| 140285 | STM14_1816     | 378450026 | - | 1591641-1591757 | hypothetical protein                            | 1578177-1578293 | - | 117 |
| ST474  | STM474_1518    | 379700677 | - | 1542834-1542947 | hypothetical protein                            | 1582494-1582607 | - | 114 |
| 140285 | STM14_1827     | 378450036 | - | 1601704-1601919 | hypothetical protein                            | 1588240-1588455 | - | 216 |
| 140285 | STM14_1828     | 378450037 | + | 1601786-1601923 | peptidyl-di-peptidase dcp                       | 1588322-1588459 | + | 138 |
| 140285 | STM14_1831     | 378450040 | - | 1602970-1603068 | hypothetical protein                            | 1589506-1589604 | - | 99  |
| 140285 | STM14_1833     | 378450042 | - | 1603865-1604014 | hypothetical protein                            | 1590401-1590550 | - | 150 |
| T00240 | STMDT12_C15310 | 378984072 | - | 1591761-1591856 | hypothetical protein                            | 1590584-1590679 | - | 96  |
| 140285 | STM14_1847     | 378450056 | + | 1615524-1615850 | putative inner membrane protein                 | 1602043-1602369 | + | 327 |
| 140285 | STM14_1858     | 378450067 | - | 1625009-1625161 | hypothetical protein                            | 1611528-1611680 | - | 153 |
| 140285 | STM14_1867     | 378450076 | - | 1634718-1634879 | hypothetical protein                            | 1621234-1621395 | - | 162 |
| UK1    | STMUK_1521     | 378988893 | + | 1587577-1587705 | hypothetical protein                            | 1621924-1622052 | + | 129 |
| ST474  | STM474_1578    | 379700736 | - | 1602385-1602519 | hypothetical protein                            | 1638047-1638181 | - | 135 |
| 140285 | STM14_1890     | 378450098 | + | 1657503-1657634 | hypothetical protein                            | 1640041-1640172 | + | 132 |
| 140285 | STM14_1895     | 378450103 | + | 1663489-1663641 | hypothetical protein                            | 1646027-1646179 | + | 153 |
| 140285 | STM14_1897     | 378450105 | - | 1664885-1665067 | hypothetical protein                            | 1647423-1647605 | - | 183 |
| 140285 | STM14_1902     | 378450110 | + | 1668962-1669093 | hypothetical protein                            | 1651500-1651631 | + | 132 |
| 140285 | STM14_1904     | 378450112 | - | 1670559-1670702 | hypothetical protein                            | 1653097-1653240 | - | 144 |
| 140285 | STM14_1911     | 378450119 | - | 1679194-1679457 | hypothetical protein                            | 1661732-1661995 | - | 264 |
| 140285 | STM14_1913     | 378450121 | + | 1680178-1680390 | hypothetical protein                            | 1662716-1662928 | + | 213 |
| 140285 | STM14_1914     | 378450122 | - | 1680335-1680472 | hypothetical protein                            | 1662873-1663010 | - | 138 |
| 140285 | STM14_1915     | 378450123 | + | 1680342-1680476 | hypothetical protein                            | 1662880-1663014 | + | 135 |
| 140285 | STM14_1919     | 378450127 | - | 1683664-1683783 | hypothetical protein                            | 1666202-1666321 | - | 120 |
| 140285 | STM14_1922     | 378450130 | + | 1686850-1686969 | hypothetical protein                            | 1669388-1669507 | + | 120 |
| 140285 | STM14_1923     | 378450131 | - | 1686958-1687080 | hypothetical protein                            | 1669496-1669618 | - | 123 |
| 140285 | STM14_1932     | 410023183 | + | 1696611-1696706 | hypothetical protein                            | 1679149-1679244 | + | 96  |
| 140285 | STM14_1933     | 378450141 | + | 1696703-1696807 | hypothetical protein                            | 1679241-1679345 | + | 105 |
| 140285 | STM14_1939     | 378450147 | - | 1701681-1701785 | hypothetical protein                            | 1684219-1684323 | - | 105 |
| 140285 | STM14_1950     | 378450158 | + | 1711642-1711749 | hypothetical protein                            | 1694180-1694287 | + | 108 |
| 140285 | STM14_1961     | 378450169 | + | 1719701-1719814 | hypothetical protein                            | 1702239-1702352 | + | 114 |
| 140285 | STM14_1967     | 378450175 | + | 1727480-1727695 | hypothetical protein                            | 1710018-1710233 | + | 216 |
| T00240 | STMDT12_C16480 | 378984189 | - | 1717552-1717677 | hypothetical protein                            | 1712376-1712501 | - | 126 |
| ST474  | STM474_1641    | 379700799 | + | 1676859-1677014 | hypothetical protein                            | 1712521-1712676 | + | 156 |
| 140285 | STM14_1972     | 378450180 | - | 1731028-1731132 | hypothetical protein                            | 1713566-1713670 | - | 105 |
| 140285 | STM14_1973     | 378450181 | + | 1731115-1731225 | hypothetical protein                            | 1713653-1713763 | + | 111 |
| 140285 | STM14_1976     | 378450184 | - | 1733662-1733814 | hypothetical protein                            | 1716200-1716352 | - | 153 |
| T00240 | STMDT12_C16570 | 378984198 | - | 1726118-1726213 | hypothetical protein                            | 1720942-1721037 | - | 96  |
| 140285 | STM14_1996     | 378450204 | - | 1755685-1755894 | hypothetical protein                            | 1738223-1738432 | - | 210 |
| T00240 | STMDT12_C16740 | 378984215 | - | 1744637-1744789 | hypothetical protein                            | 1739461-1739613 | - | 153 |
| 140285 | STM14_2004     | 378450212 | - | 1762419-1762580 | hypothetical protein                            | 1744957-1745118 | - | 162 |
| 140285 | STM14_2024     | 378450229 | - | 1779789-1779902 | hypothetical protein                            | 1762327-1762440 | - | 114 |
| 140285 | STM14_2048     | 378450253 | - | 1800491-1800637 | hypothetical protein                            | 1782317-1782463 | - | 147 |
| 140285 | STM14_2049     | 378450254 | + | 1800647-1800769 | hypothetical protein                            | 1782473-1782595 | + | 123 |
| 140285 | STM14_2054     | 378450259 | - | 1803682-1803798 | hypothetical protein                            | 1785508-1785624 | - | 117 |
| 140285 | STM14_2057     | 378450262 | + | 1807079-1807216 | hypothetical protein                            | 1788905-1789042 | + | 138 |
| 140285 | STM14_2059     | 378450264 | + | 1809302-1809514 | hypothetical protein                            | 1791128-1791340 | + | 213 |
| 140285 | STM14_2061     | 378450266 | + | 1810467-1810628 | hypothetical protein                            | 1792293-1792454 | + | 162 |
| 140285 | osmB           | 378450267 | + | 1810612-1810830 | lipoprotein                                     | 1792438-1792656 | + | 219 |
| 140285 | STM14_2065     | 378450270 | + | 1812029-1812142 | hypothetical protein                            | 1793855-1793968 | + | 114 |
| 140285 | STM14_2071     | 378450276 | - | 1818504-1818674 | hypothetical protein                            | 1800330-1800500 | - | 171 |
| ST474  | ymia           | 379700885 | - | 1764839-1764967 | hypothetical protein                            | 1800501-1800629 | - | 129 |
| 140285 | STM14_2073     | 378450278 | + | 1820026-1820190 | hypothetical protein                            | 1801852-1802016 | + | 165 |
| 140285 | STM14_2076     | 378450281 | - | 1823233-1823364 | hypothetical protein                            | 1805059-1805190 | - | 132 |
| 140285 | STM14_2079     | 378450284 | + | 1824904-1825014 | hypothetical protein                            | 1806730-1806840 | + | 111 |
| 140285 | trpL           | 378450289 | + | 1829100-1829144 | trp operon leader peptide                       | 1810926-1810970 | + | 45  |
| 140285 | STM14_2102     | 378450306 | - | 1843241-1843414 | hypothetical protein                            | 1825067-1825240 | - | 174 |
| 140285 | STM14_2117     | 378450320 | + | 1858398-1858580 | hypothetical protein                            | 1840224-1840406 | + | 183 |
| 140285 | STM14_2123     | 378450326 | - | 1863160-1863279 | hypothetical protein                            | 1844986-1845105 | - | 120 |
| 140285 | STM14_2128     | 378450328 | + | 1865980-1866144 | hypothetical protein                            | 1847806-1847970 | + | 165 |
| 140285 | STM14_2133     | 378450333 | + | 1872924-1873043 | hypothetical protein                            | 1854750-1854869 | + | 120 |
| 140285 | STM14_2135     | 378450335 | - | 1874718-1874903 | hypothetical protein                            | 1856544-1856729 | - | 186 |
| 140285 | STM14_2148     | 378450348 | - | 1886567-1886695 | hypothetical protein                            | 1868393-1868521 | - | 129 |
| 140285 | STM14_2151     | 378450351 | - | 1888181-1888351 | hypothetical protein                            | 1870007-1870177 | - | 171 |
| 140285 | STM14_2152     | 378450352 | - | 1888329-1888433 | hypothetical protein                            | 1870155-1870259 | - | 105 |
| 140285 | STM14_2158     | 378450358 | - | 1893588-1893701 | hypothetical protein                            | 1875414-1875527 | - | 114 |
| 140285 | STM14_2160     | 378450360 | - | 1895293-1895421 | hypothetical protein                            | 1877119-1877247 | - | 129 |
| 140285 | STM14_2169     | 378450369 | + | 1903787-1903876 | hypothetical protein                            | 1885613-1885702 | + | 90  |
| 140285 | STM14_2171     | 378450371 | - | 1905555-1905662 | hypothetical protein                            | 1887381-1887488 | - | 108 |
| 140285 | STM14_2180     | 378450380 | - | 1914824-1914934 | hypothetical protein                            | 1896650-1896760 | - | 111 |
| 140285 | STM14_2187     | 378450387 | + | 1920441-1920557 | hypothetical protein                            | 1902267-1902383 | + | 117 |
| 140285 | STM14_2189     | 378450389 | - | 1920801-1920899 | hypothetical protein                            | 1902627-1902725 | - | 99  |
| 140285 | STM14_2200     | 378450400 | + | 1928329-1928535 | hypothetical protein                            | 1910154-1910360 | + | 207 |
| 140285 | STM14_2219     | 378450419 | - | 1946749-1946859 | hypothetical protein                            | 1928574-1928684 | - | 111 |
| 140285 | yobF           | 378450421 | - | 1947174-1947317 | putative cytoplasmic protein                    | 1928999-1929142 | - | 144 |
| 140285 | STM14_2222     | 378450422 | + | 1947434-1947541 | hypothetical protein                            | 1929259-1929366 | + | 108 |
| 140285 | STM14_2223     | 378450423 | + | 1947556-1947696 | hypothetical protein                            | 1929381-1929521 | + | 141 |
| 140285 | STM14_2224     | 378450424 | - | 1947624-1947740 | hypothetical protein                            | 1929449-1929565 | - | 117 |
| 140285 | STM14_2225     | 378450425 | - | 1947966-1948253 | hypothetical protein                            | 1929791-1930078 | - | 288 |
| 140285 | yobG           | 378450426 | - | 1948324-1948467 | hypothetical protein                            | 1930149-1930292 | - | 144 |



|         |             |           |   |                 |                                                               |                 |   |     |
|---------|-------------|-----------|---|-----------------|---------------------------------------------------------------|-----------------|---|-----|
| 140285  | STM14_2803  | 378450980 | - | 2425164-2425280 | hypothetical protein                                          | 2397277-2397393 | - | 117 |
| 140285  | STM14_2805  | 378450982 | + | 2427980-2428210 | hypothetical protein                                          | 2400093-2400323 | + | 231 |
| 140285  | STM14_2806  | 378450983 | + | 2428153-2428293 | hypothetical protein                                          | 2400266-2400406 | + | 141 |
| 140285  | STM14_2811  | 378450988 | + | 2432657-2432773 | hypothetical protein                                          | 2404770-2404886 | + | 117 |
| 140285  | STM14_2822  | 378450999 | + | 2445948-2446052 | hypothetical protein                                          | 2418061-2418165 | + | 105 |
| 140285  | STM14_2823  | 378451000 | + | 2446155-2446358 | hypothetical protein                                          | 2418268-2418471 | + | 204 |
| 140285  | STM14_2834  | 378451011 | + | 2455277-2455405 | hypothetical protein                                          | 2427390-2427518 | + | 129 |
| 140285  | elaB        | 378451026 | - | 2470331-2470642 | hypothetical protein                                          | 2442444-2442755 | - | 312 |
| ST474   | STM474_2412 | 379701547 | - | 2421293-2421412 | hypothetical protein                                          | 2447243-2447362 | - | 120 |
| 140285  | STM14_2854  | 378451030 | - | 2475407-2475529 | hypothetical protein                                          | 2447521-2447643 | - | 123 |
| 140285  | STM14_2855  | 378451031 | + | 2475538-2475645 | hypothetical protein                                          | 2447652-2447759 | + | 108 |
| 140285  | STM14_2856  | 378451032 | + | 2475654-2475836 | hypothetical protein                                          | 2447768-2447950 | + | 183 |
| 140285  | nuoK        | 378451036 | - | 2481051-2481353 | NADH dehydrogenase subunit K                                  | 2453165-2453467 | - | 303 |
| 140285  | STM14_2870  | 378451046 | + | 2491031-2491153 | hypothetical protein                                          | 2463145-2463267 | + | 133 |
| 140285  | STM14_2871  | 378451047 | - | 2491241-2491357 | hypothetical protein                                          | 2463355-2463471 | - | 117 |
| 140285  | STM14_2880  | 378451056 | - | 2499179-2499430 | hypothetical protein                                          | 2471293-2471544 | - | 252 |
| 140285  | STM14_2881  | 378451057 | + | 2499320-2499454 | hypothetical protein                                          | 2471434-2471568 | + | 135 |
| 140285  | STM14_2890  | 378451066 | + | 2508681-2508854 | hypothetical protein                                          | 2480795-2480968 | + | 174 |
| 140285  | STM14_2902  | 378451078 | + | 2517875-2518045 | hypothetical protein                                          | 2489989-2490159 | + | 171 |
| 140285  | STM14_2911  | 378451087 | - | 2527947-2528102 | hypothetical protein                                          | 2500061-2500216 | - | 156 |
| 140285  | STM14_2921  | 378451097 | + | 2537322-2537438 | hypothetical protein                                          | 2509436-2509552 | + | 117 |
| 140285  | STM14_2940  | 378451116 | + | 2553683-2553823 | hypothetical protein                                          | 2525797-2525937 | + | 141 |
| 140285  | STM14_2941  | 378451117 | - | 2553820-2553948 | hypothetical protein                                          | 2525934-2526062 | - | 129 |
| T000240 | STM14_2952  | 378984961 | + | 2507125-2507337 | hypothetical protein                                          | 2535248-2535460 | + | 213 |
| 140285  | STM14_2952  | 378451127 | - | 2565752-2565865 | hypothetical protein                                          | 2537866-2537979 | - | 114 |
| 140285  | STM14_2959  | 378451134 | + | 2575387-2575775 | hypothetical protein                                          | 2545701-2545889 | + | 189 |
| 140285  | STM14_2975  | 378451144 | - | 2584882-2585040 | hypothetical protein                                          | 2556996-2557154 | - | 159 |
| 140285  | STM14_2986  | 378451155 | + | 2595762-2595923 | hypothetical protein                                          | 2567876-2568037 | + | 162 |
| 140285  | STM14_2987  | 410023203 | - | 2595873-2595998 | hypothetical protein                                          | 2567987-2568112 | - | 126 |
| 140285  | STM14_2988  | 378451157 | + | 2595966-2596094 | hypothetical protein                                          | 2568080-2568208 | + | 129 |
| 140285  | STM14_3032  | 378451201 | + | 2633812-2634012 | hypothetical protein                                          | 2605926-2606126 | + | 201 |
| 140285  | STM14_3043  | 378451212 | - | 2645096-2645227 | hypothetical protein                                          | 2617212-2617343 | - | 132 |
| 140285  | STM14_3047  | 378451216 | + | 2650401-2650601 | hypothetical protein                                          | 2622517-2622717 | + | 201 |
| 140285  | STM14_3055  | 378451224 | - | 2657708-2658061 | putative glycerate kinase                                     | 2629824-2630177 | - | 354 |
| 140285  | STM14_3056  | 378451225 | - | 2657883-2658191 | hypothetical protein                                          | 2629999-2630307 | - | 309 |
| 140285  | STM14_3063  | 378451232 | - | 2664349-2664552 | hypothetical protein                                          | 2637176-2637379 | - | 204 |
| 140285  | STM14_3071  | 378451240 | + | 2672763-2672954 | putative inner membrane protein                               | 2645590-2645781 | + | 192 |
| T000240 | STM14_3079  | 378985065 | + | 2617191-2617382 | putative cytoplasmic protein                                  | 2646146-2646337 | + | 192 |
| 140285  | STM14_3079  | 378451248 | + | 2685671-2685784 | hypothetical protein                                          | 2658498-2658611 | + | 114 |
| 140285  | STM14_3080  | 378451249 | + | 2685675-2685857 | hypothetical protein                                          | 2658502-2658684 | + | 183 |
| 140285  | STM14_3081  | 378451250 | - | 2685854-2685967 | hypothetical protein                                          | 2658681-2658794 | - | 114 |
| ST474   | STM474_2618 | 379701745 | + | 2646222-2646344 | hypothetical protein                                          | 2672885-2673007 | + | 123 |
| 140285  | STM14_3086  | 378451254 | + | 2702354-2702470 | hypothetical protein                                          | 2675181-2675297 | + | 117 |
| 140285  | STM14_3087  | 378451255 | - | 2702529-2702684 | hypothetical protein                                          | 2675356-2675511 | - | 156 |
| 140285  | STM14_3090  | 378451258 | + | 2704480-2704581 | hypothetical protein                                          | 2677307-2677408 | + | 102 |
| 140285  | STM14_3096  | 378451264 | - | 2710094-2710216 | type IV pilus biogenesis/stability protein PilW               | 2682921-2683043 | - | 123 |
| 140285  | STM14_3099  | 378451267 | + | 2712052-2712147 | hypothetical protein                                          | 2684879-2684974 | + | 96  |
| 140285  | STM14_3107  | 378451275 | - | 2725280-2725504 | hypothetical protein                                          | 2698107-2698331 | - | 225 |
| ST474   | STM474_2636 | 379701763 | + | 2671480-2671593 | hypothetical protein                                          | 2698143-2698256 | + | 114 |
| 140285  | STM14_3109  | 378451277 | - | 2726253-2726387 | hypothetical protein                                          | 2699080-2699214 | - | 135 |
| 140285  | STM14_3119  | 378451287 | + | 2734356-2734475 | hypothetical protein                                          | 2707183-2707302 | + | 120 |
| 140285  | STM14_3122  | 378451290 | + | 2735856-2735978 | hypothetical protein                                          | 2708683-2708805 | + | 123 |
| 140285  | STM14_3123  | 378451291 | - | 2735883-2735993 | hypothetical protein                                          | 2708710-2708820 | - | 111 |
| 140285  | STM14_3134  | 378451302 | - | 2746625-2746771 | hypothetical protein                                          | 2719452-2719598 | - | 147 |
| 140285  | STM14_3144  | 378451312 | + | 2759420-2759548 | hypothetical protein                                          | 2732247-2732375 | + | 129 |
| 140285  | STM14_3146  | 378451314 | + | 2763716-2763949 | hypothetical protein                                          | 2736543-2736776 | + | 234 |
| 140285  | STM14_3165  | 378451333 | - | 2782226-2782354 | hypothetical protein                                          | 2755053-2755181 | - | 129 |
| ST474   | STM474_2692 | 379701819 | - | 2729509-2729628 | integrase, catalytic region                                   | 2756178-2756297 | - | 120 |
| SL1344  | SL1344_2548 | 378700486 | - | 2730253-2730318 | bacteriophage protein                                         | 2756922-2756987 | - | 66  |
| 140285  | STM14_1473  | 378449695 | - | 1321447-1322052 | hypothetical protein                                          | 2765905-2766510 | + | 606 |
| 140285  | STM14_3199  | 378451366 | - | 2812905-2813093 | hypothetical protein                                          | 2785727-2785915 | - | 189 |
| 140285  | STM14_3202  | 378451368 | - | 2814160-2814285 | hypothetical protein                                          | 2786982-2787107 | - | 126 |
| 140285  | STM14_3204  | 378451370 | - | 2815110-2815250 | hypothetical protein                                          | 2787932-2788072 | - | 141 |
| 140285  | STM14_3206  | 378451372 | - | 2815861-2816061 | hypothetical protein                                          | 2788683-2788883 | - | 201 |
| 140285  | STM14_3209  | 378451375 | + | 2816906-2817040 | prophage DinI                                                 | 2789728-2789862 | + | 135 |
| 140285  | STM14_3216  | 378451382 | - | 2820999-2821259 | hypothetical protein                                          | 2793821-2794081 | - | 261 |
| 140285  | STM14_3229  | 378451395 | + | 2830868-2831005 | hypothetical protein                                          | 2803690-2803827 | + | 138 |
| 140285  | STM14_3230  | 378451396 | - | 2831002-2831118 | hypothetical protein                                          | 2803824-2803940 | - | 117 |
| 140285  | STM14_3235  | 378451401 | - | 2833834-2833998 | hypothetical protein                                          | 2806656-2806820 | - | 165 |
| 140285  | STM14_3236  | 378451402 | - | 2833998-2834177 | hypothetical protein                                          | 2806820-2806999 | - | 180 |
| 140285  | STM14_3239  | 378451405 | - | 2836525-2836725 | putative methyltransferase                                    | 2809347-2809547 | - | 201 |
| 140285  | STM14_3249  | 378451415 | + | 2846371-2846505 | hypothetical protein                                          | 2819193-2819327 | + | 135 |
| 140285  | STM14_3259  | 378451420 | + | 2855709-2855837 | hypothetical protein                                          | 2828448-2828576 | + | 129 |
| 140285  | STM14_3260  | 378451421 | + | 2855915-2856031 | hypothetical protein                                          | 2828654-2828770 | + | 117 |
| 140285  | STM14_3267  | 378451427 | + | 2861933-2862097 | hypothetical protein                                          | 2834672-2834836 | + | 165 |
| 140285  | STM14_3272  | 378451432 | + | 2866577-2866735 | hypothetical protein                                          | 2839316-2839474 | + | 159 |
| 140285  | STM14_3273  | 378451433 | - | 2866637-2866750 | hypothetical protein                                          | 2839376-2839489 | - | 114 |
| 140285  | STM14_3280  | 378451440 | - | 2870862-2871008 | hypothetical protein                                          | 2843601-2843747 | - | 147 |
| 140285  | STM14_3282  | 378451442 | + | 2872506-2872700 | putative cytochrome c-type biogenesis protein (heme exporter) | 2845245-2845439 | + | 195 |
| UK1     | STMUK_2717  | 378990059 | - | 2824344-2824538 | putative cytoplasmic protein                                  | 2848831-2849025 | - | 195 |
| 140285  | STM14_3291  | 378451450 | - | 2879362-2879469 | hypothetical protein                                          | 2852102-2852209 | - | 108 |
| 140285  | STM14_3295  | 378451454 | + | 2881056-2881160 | hypothetical protein                                          | 2853796-2853900 | + | 105 |
| 140285  | STM14_3296  | 378451455 | - | 2881388-2881540 | hypothetical protein                                          | 2854128-2854280 | - | 153 |
| 140285  | STM14_3301  | 378451459 | - | 2898012-2898236 | hypothetical protein                                          | 2870752-2870976 | - | 225 |
| 140285  | STM14_3312  | 378451470 | - | 2908421-2908582 | hypothetical protein                                          | 2881161-2881322 | - | 162 |
| 140285  | STM14_3324  | 378451481 | - | 2917712-2917867 | hypothetical protein                                          | 2890452-2890607 | - | 156 |
| 140285  | STM14_3326  | 378451483 | - | 2919626-2919739 | hypothetical protein                                          | 2892366-2892479 | - | 114 |
| ST474   | STM474_2898 | 379702018 | - | 2927700-2927858 | hypothetical protein                                          | 2898099-2898257 | - | 159 |
| T000240 | STM14_3340  | 378985362 | - | 2935935-2936111 | hypothetical protein                                          | 2905354-2905530 | - | 177 |
| 140285  | STM14_3340  | 378451496 | + | 2935806-2935976 | hypothetical protein                                          | 2908556-2908726 | + | 171 |
| 140285  | STM14_3341  | 378451497 | - | 2936002-2936229 | hypothetical protein                                          | 2908752-2908979 | - | 228 |
| 140285  | STM14_3342  | 378451498 | - | 2936297-2936449 | hypothetical protein                                          | 2909047-2909199 | - | 153 |
| 140285  | STM14_3343  | 378451499 | + | 2936325-2936507 | hypothetical protein                                          | 2909075-2909257 | + | 183 |









|        |             |           |   |                 |                              |                 |   |     |
|--------|-------------|-----------|---|-----------------|------------------------------|-----------------|---|-----|
| 14028S | STM14_5413  | 378453480 | + | 4775969-4776121 | hypothetical protein         | 4785126-4785278 | + | 153 |
| 14028S | STM14_5415  | 378453482 | + | 4776954-4777076 | hypothetical protein         | 4786111-4786233 | + | 123 |
| 14028S | STM14_5416  | 378453483 | - | 4776976-4777107 | hypothetical protein         | 4786133-4786264 | - | 132 |
| 14028S | STM14_5426  | 378453493 | - | 4786173-4786316 | hypothetical protein         | 4795330-4795473 | - | 144 |
| 14028S | STM14_5427  | 378453494 | + | 4786386-4786523 | hypothetical protein         | 4795543-4795680 | + | 138 |
| 14028S | STM14_5429  | 378453496 | - | 4787107-4787220 | hypothetical protein         | 4796252-4796365 | - | 114 |
| ST474  | STM474_4722 | 379703761 | - | 4794952-4795101 | hypothetical protein         | 4796346-4796495 | - | 150 |
| 14028S | yjiS        | 378453499 | + | 4788866-4789030 | putative cytoplasmic protein | 4798011-4798175 | + | 165 |
| 14028S | STM14_5435  | 378453502 | - | 4790281-4790412 | hypothetical protein         | 4799426-4799557 | - | 132 |
| 14028S | STM14_5440  | 378453507 | + | 4798305-4798442 | hypothetical protein         | 4807450-4807587 | + | 138 |
| 14028S | STM14_5447  | 378453514 | - | 4804689-4804838 | hypothetical protein         | 4813834-4813983 | - | 150 |
| 14028S | STM14_5455  | 378453522 | + | 4812431-4812535 | hypothetical protein         | 4821576-4821680 | + | 105 |
| 14028S | STM14_5462  | 378453529 | - | 4818419-4818574 | hypothetical protein         | 4827564-4827719 | - | 156 |
| 14028S | STM14_5468  | 378453535 | + | 4823006-4823134 | hypothetical protein         | 4832151-4832279 | + | 129 |
| 14028S | STM14_5474  | 378453538 | + | 4824998-4825105 | hypothetical protein         | 4834143-4834250 | + | 108 |
| 14028S | STM14_5479  | 378453543 | + | 4828502-4828636 | hypothetical protein         | 4837647-4837781 | + | 135 |
| 14028S | STM14_5481  | 378453545 | + | 4829440-4829619 | hypothetical protein         | 4838575-4838754 | + | 180 |
| 14028S | STM14_5486  | 378453550 | + | 4833992-4834120 | hypothetical protein         | 4843127-4843255 | + | 129 |
| 14028S | STM14_5496  | 378453560 | + | 4843995-4844144 | hypothetical protein         | 4853130-4853279 | + | 150 |
| ST474  | smp         | 379703819 | + | 4853656-4853805 | phosphoserine phosphatase    | 4855043-4855192 | + | 150 |



| Genome name | Gene Name     | GI        | Reference details |               |                                          | Gene annotated in SL1344 |        |             |
|-------------|---------------|-----------|-------------------|---------------|------------------------------------------|--------------------------|--------|-------------|
|             |               |           | Strand            | CDS-region    | Product                                  | Coordinate               | Strand | Length (bp) |
| 140285      | STM14_0012    | 378448286 | +                 | 11257-11424   | hypothetical protein                     | 11257-11424              | +      | 168         |
| 140285      | STM14_0015    | 378448289 | +                 | 14845-14958   | hypothetical protein                     | 14845-14958              | +      | 114         |
| 140285      | STM14_0020    | 378448294 | +                 | 17613-17741   | hypothetical protein                     | 17613-17741              | -      | 129         |
| 140285      | STM14_0021    | 378448295 | +                 | 17665-17787   | hypothetical protein                     | 17665-17787              | +      | 123         |
| 140285      | STM14_0024    | 378448298 | +                 | 23091-23240   | hypothetical protein                     | 23091-23240              | +      | 150         |
| 140285      | STM14_0026    | 378448300 | +                 | 24094-24198   | hypothetical protein                     | 24094-24198              | -      | 105         |
| 140285      | STM14_0027    | 378448301 | +                 | 24315-24426   | hypothetical protein                     | 24315-24426              | +      | 111         |
| 140285      | STM14_0040    | 378448317 | +                 | 34828-34974   | hypothetical protein                     | 34828-34974              | +      | 147         |
| 140285      | STM14_0057    | 378448331 | +                 | 57203-57334   | hypothetical protein                     | 57203-57334              | +      | 132         |
| 140285      | STM14_0068    | 378448342 | +                 | 68513-68671   | hypothetical protein                     | 68513-68671              | -      | 159         |
| 140285      | STM14_0076    | 378448350 | +                 | 74964-75239   | hypothetical protein                     | 74967-75242              | -      | 276         |
| 140285      | STM14_0089    | 378448363 | +                 | 89119-89328   | hypothetical protein                     | 88410-88619              | +      | 210         |
| ST474       | STM474_0083   | 379699298 | +                 | 92031-92228   | hypothetical protein                     | 92031-92228              | -      | 198         |
| 140285      | STM14_0097    | 378448371 | +                 | 95263-95379   | hypothetical protein                     | 94554-94670              | -      | 117         |
| 140285      | STM14_0102    | 378448376 | +                 | 98738-99019   | hypothetical protein                     | 98029-98310              | +      | 282         |
| 140285      | STM14_0105    | 378448379 | -                 | 101349-101474 | hypothetical protein                     | 100640-100765            | -      | 126         |
| 140285      | STM14_0113    | 378448387 | +                 | 108892-109053 | hypothetical protein                     | 108183-108344            | -      | 162         |
| 140285      | STM14_0128    | 378448402 | -                 | 127427-127546 | putative lipoprotein                     | 126718-126837            | -      | 120         |
| 140285      | STM14_0130    | 378448404 | +                 | 129166-129492 | hypothetical protein                     | 128457-128783            | -      | 327         |
| ST474       | STM474_0114   | 379699329 | +                 | 128578-128724 | hypothetical protein                     | 128578-128724            | +      | 147         |
| ST474       | STM474_0115   | 379699330 | +                 | 128926-129039 | hypothetical protein                     | 128926-129039            | +      | 114         |
| 140285      | STM14_0136    | 378448410 | +                 | 134689-134793 | hypothetical protein                     | 133980-134084            | -      | 105         |
| 140285      | STM14_0137    | 378448411 | +                 | 135067-135210 | hypothetical protein                     | 134358-134501            | +      | 144         |
| 140285      | STM14_0141    | 378448415 | +                 | 138755-138877 | hypothetical protein                     | 138046-138168            | -      | 123         |
| LT2         | STM04630      | 409994397 | +                 | 139338-139487 | hypothetical protein                     | 139341-139490            | -      | 150         |
| 140285      | STM14_0143    | 378448417 | +                 | 140204-140338 | hypothetical protein                     | 139495-139629            | -      | 135         |
| 140285      | STM14_0144    | 378448418 | +                 | 140406-140633 | hypothetical protein                     | 139787-139924            | +      | 138         |
| 140285      | STM14_0165    | 378448438 | +                 | 162875-162929 | LysR family transcriptional regulator    | 162166-162270            | +      | 105         |
| 140285      | STM14_0173    | 378448446 | +                 | 168890-169072 | hypothetical protein                     | 168181-168363            | -      | 183         |
| 140285      | STM14_0179    | 378448452 | +                 | 173962-174090 | hypothetical protein                     | 173253-173381            | -      | 129         |
| 140285      | STM14_0181    | 378448454 | +                 | 175672-175794 | hypothetical protein                     | 174963-175085            | +      | 123         |
| 140285      | STM14_0186    | 378448459 | +                 | 183222-183350 | hypothetical protein                     | 182513-182641            | +      | 129         |
| 140285      | STM14_0215    | 378448487 | +                 | 213058-213171 | hypothetical protein                     | 212350-212463            | -      | 114         |
| 140285      | STM14_0224    | 378448496 | +                 | 221426-221587 | hypothetical protein                     | 220718-220879            | +      | 162         |
| 140285      | STM14_0225    | 378448497 | +                 | 221522-221629 | hypothetical protein                     | 220814-220921            | -      | 108         |
| 140285      | STM14_0227    | 378448499 | +                 | 224289-224429 | hypothetical protein                     | 223581-223721            | -      | 141         |
| 140285      | STM14_0232    | 378448504 | +                 | 230459-230665 | hypothetical protein                     | 229751-229957            | +      | 207         |
| 140285      | STM14_0233    | 378448505 | +                 | 231001-231144 | hypothetical protein                     | 230293-230436            | +      | 144         |
| 140285      | STM14_0242    | 378448514 | +                 | 239222-239365 | hypothetical protein                     | 238514-238657            | +      | 144         |
| 140285      | STM14_0256    | 378448527 | +                 | 254799-255083 | 30S ribosomal protein S2                 | 254090-254374            | +      | 285         |
| 140285      | STM14_0262    | 378448533 | +                 | 259830-260033 | hypothetical protein                     | 259121-259324            | +      | 204         |
| 140285      | STM14_0292    | 378448562 | +                 | 289616-289819 | hypothetical protein                     | 288907-289110            | -      | 204         |
| 140285      | STM14_0310    | 378448574 | +                 | 304859-304966 | hypothetical protein                     | 304150-304257            | -      | 108         |
| 140285      | STM14_0312    | 378448575 | +                 | 305167-305274 | hypothetical protein                     | 304458-304565            | +      | 108         |
| 140285      | STM14_0322    | 378448585 | +                 | 316755-316865 | invasol Sra                              | 316046-316156            | +      | 111         |
| 140285      | STM14_0337    | 378448600 | +                 | 330303-330512 | hypothetical protein                     | 329594-329803            | +      | 210         |
| 140285      | STM14_0343    | 378448606 | +                 | 339144-339275 | hypothetical protein                     | 337931-338068            | +      | 132         |
| 140285      | STM14_0344    | 378448607 | +                 | 339345-339485 | hypothetical protein                     | 338138-338278            | +      | 141         |
| 140285      | STM14_0346    | 378448609 | +                 | 340013-340288 | hypothetical protein                     | 338806-339081            | -      | 276         |
| LT2         | STM04655      | 409994398 | +                 | 339629-339871 | hypothetical protein                     | 339107-339349            | -      | 243         |
| ST474       | STM474_0312   | 379699516 | +                 | 341562-341681 | hypothetical protein                     | 341562-341681            | +      | 120         |
| 140285      | STM14_0357    | 378448617 | +                 | 348560-348820 | hypothetical protein                     | 347353-347613            | +      | 261         |
| D23580      | STMWW_03133   | 378443750 | +                 | 348247-348378 | putative transposase                     | 347754-347885            | +      | 132         |
| 140285      | STM14_0361    | 378448621 | -                 | 351322-351450 | hypothetical protein                     | 350115-350243            | -      | 129         |
| 140285      | STM14_0377    | 378448636 | +                 | 366783-366953 | hypothetical protein                     | 365576-365728            | +      | 153         |
| UK1         | STMUK_0331    | 378987726 | +                 | 361332-369353 | putative inner membrane protein          | 368636-368857            | +      | 222         |
| 140285      | STM14_0397    | 378448654 | +                 | 385733-385843 | hypothetical protein                     | 384526-384636            | -      | 111         |
| 140285      | STM14_0403    | 378448660 | -                 | 390802-390939 | hypothetical protein                     | 389595-389732            | -      | 138         |
| 140285      | STM14_0411    | 378448668 | +                 | 399120-399233 | hypothetical protein                     | 397913-398026            | +      | 114         |
| 140285      | STM14_0415    | 378448672 | +                 | 402243-402422 | putative metal-binding transport protein | 401036-401215            | +      | 180         |
| 140285      | STM14_0419    | 378448676 | +                 | 409084-409218 | hypothetical protein                     | 407877-408011            | +      | 135         |
| 140285      | STM14_0420    | 378448677 | +                 | 409118-409237 | hypothetical protein                     | 407911-408030            | -      | 120         |
| 140285      | STM14_0430    | 378448687 | +                 | 418467-418640 | hypothetical protein                     | 417260-417433            | +      | 174         |
| 140285      | STM14_0436    | 378448693 | +                 | 425565-425684 | hypothetical protein                     | 424358-424477            | +      | 120         |
| 140285      | STM14_0437    | 378448694 | +                 | 426755-425827 | hypothetical protein                     | 424468-424620            | -      | 153         |
| 140285      | STM14_0441    | 378448698 | +                 | 430751-430929 | hypothetical protein                     | 429544-429702            | -      | 159         |
| 140285      | STM14_0442    | 378448699 | +                 | 430925-431059 | hypothetical protein                     | 429718-429852            | +      | 135         |
| 140285      | STM14_0446    | 378448703 | +                 | 433714-433827 | hypothetical protein                     | 432507-432620            | +      | 114         |
| 140285      | STM14_0451    | 378448708 | +                 | 437620-437742 | hypothetical protein                     | 436413-436535            | +      | 123         |
| 140285      | STM14_0453    | 378448710 | +                 | 438082-438243 | hypothetical protein                     | 436875-437036            | -      | 162         |
| 140285      | STM14_0457    | 378448714 | +                 | 440792-440941 | hypothetical protein                     | 439585-439734            | +      | 150         |
| 140285      | STM14_0464    | 378448721 | +                 | 444556-444687 | hypothetical protein                     | 443349-443480            | -      | 132         |
| 000240      | STM012_C04560 | 378982997 | +                 | 482933-483049 | hypothetical protein                     | 444374-444490            | +      | 117         |
| 140285      | STM14_0469    | 378448726 | +                 | 451315-451446 | hypothetical protein                     | 450108-450239            | -      | 132         |
| 140285      | STM14_0472    | 378448729 | +                 | 453755-453904 | hypothetical protein                     | 452548-452697            | -      | 150         |
| 140285      | STM14_0479    | 378448736 | +                 | 461340-461450 | DNA metabolism protein                   | 460133-460243            | +      | 111         |
| 140285      | STM14_0487    | 378448744 | +                 | 467631-467846 | hypothetical protein                     | 466424-466639            | +      | 216         |
| D23580      | STMWW_04821   | 378443916 | +                 | 507659-507985 | hypothetical protein                     | 466642-466968            | -      | 327         |
| ST474       | STM474_0431   | 379699631 | +                 | 466787-466939 | hypothetical protein                     | 466787-466939            | +      | 153         |
| 140285      | STM14_0491    | 378448747 | +                 | 469965-470111 | hypothetical protein                     | 468758-468904            | +      | 147         |
| 140285      | STM14_0498    | 378448754 | +                 | 473976-474284 | hypothetical protein                     | 472769-473077            | +      | 309         |
| 140285      | STM14_0509    | 378448765 | +                 | 484792-484902 | hypothetical protein                     | 483585-483695            | -      | 111         |
| ST474       | STM474_0464   | 379699664 | +                 | 497880-498002 | hypothetical protein                     | 497880-498002            | -      | 123         |
| 140285      | STM14_0526    | 378448781 | +                 | 501468-501653 | hypothetical protein                     | 500261-500446            | +      | 186         |
| 140285      | STM14_0528    | 378448783 | +                 | 502053-502166 | hypothetical protein                     | 500846-500959            | +      | 114         |
| 140285      | STM14_0531    | 378448785 | +                 | 504670-504774 | hypothetical protein                     | 503463-503569            | +      | 105         |
| 140285      | STM14_0536    | 378448791 | +                 | 511028-511390 | hypothetical protein                     | 509821-510183            | -      | 363         |
| 140285      | STM14_0562    | 378448816 | +                 | 535085-535210 | hypothetical protein                     | 533879-534004            | -      | 126         |
| 140285      | ybaN          | 378448821 | +                 | 540406-540783 | hypothetical protein                     | 539200-539577            | +      | 378         |
| 140285      | STM14_0573    | 378448827 | +                 | 546597-546818 | hypothetical protein                     | 545391-545612            | -      | 222         |
| 140285      | STM14_0575    | 378448829 | +                 | 547392-547598 | hypothetical protein                     | 546186-546392            | +      | 207         |
| 140285      | STM14_0580    | 378448834 | +                 | 552798-552923 | hypothetical protein                     | 551592-551717            | +      | 126         |
| 140285      | STM14_0597    | 378448851 | +                 | 570227-570331 | hypothetical protein                     | 569021-569125            | +      | 105         |
| 140285      | STM14_0599    | 378448853 | +                 | 571546-571650 | hypothetical protein                     | 570340-570444            | -      | 105         |
| 140285      | STM14_0633    | 378448887 | +                 | 604316-604444 | hypothetical protein                     | 603110-603238            | -      | 129         |
| 140285      | STM14_0634    | 378448888 | +                 | 604400-604555 | hypothetical protein                     | 603194-603349            | +      | 156         |
| 140285      | STM14_0645    | 378448899 | +                 | 614019-614189 | hypothetical protein                     | 612813-612983            | +      | 171         |
| 140285      | STM14_0647    | 378448900 | +                 | 614287-614475 | integrase                                | 613081-613269            | -      | 189         |
| 140285      | STM14_0649    | 378448901 | +                 | 615283-615441 | hypothetical protein                     | 614077-614235            | +      | 159         |
| 140285      | STM14_0659    | 378448908 | +                 | 622266-622520 | hypothetical protein                     | 621060-621314            | -      | 255         |
| 140285      | STM14_0665    | 378448914 | +                 | 627603-627788 | hypothetical protein                     | 626397-626582            | +      | 186         |
| 140285      | STM14_0677    | 378448926 | +                 | 639577-639684 | hypothetical protein                     | 638371-638478            | +      | 108         |
| 140285      | STM14_0683    | 378448932 | +                 | 644504-644635 | hypothetical protein                     | 643298-643429            | -      | 132         |
| 140285      | STM14_0698    | 378448947 | +                 | 661861-661971 | hypothetical protein                     | 660655-660765            | +      | 111         |
| 140285      | STM14_0714    | 378448963 | +                 | 678228-678434 | hypothetical protein                     | 677220-677426            | +      | 207         |

|         |                 |           |   |                 |                                               |                 |   |     |
|---------|-----------------|-----------|---|-----------------|-----------------------------------------------|-----------------|---|-----|
| 14028S  | STM14_0715      | 378448964 | - | 678399-678539   | hypothetical protein                          | 677391-677531   | - | 141 |
| 14028S  | STM14_0726      | 378448975 | + | 688331-688513   | hypothetical protein                          | 687323-687505   | + | 183 |
| 14028S  | STM14_0730      | 378448979 | + | 692333-692443   | hypothetical protein                          | 691325-691435   | + | 111 |
| 14028S  | STM14_0735      | 378448984 | + | 694969-695076   | hypothetical protein                          | 693961-694068   | + | 108 |
| 14028S  | STM14_0738      | 378448987 | + | 696364-696498   | hypothetical protein                          | 695356-695490   | + | 135 |
| 14028S  | STM14_0740      | 378448989 | + | 697584-697727   | hypothetical protein                          | 696576-696719   | + | 144 |
| 14028S  | STM14_0742      | 378448991 | + | 698354-698719   | hypothetical protein                          | 697346-697711   | + | 366 |
| 14028S  | STM14_0745      | 378448994 | + | 700128-700277   | hypothetical protein                          | 699120-699269   | + | 150 |
| T000240 | STM00240_C07050 | 378489346 | + | 742985-743125   | hypothetical protein                          | 740342-740482   | + | 141 |
| 14028S  | STM14_0774      | 378449022 | + | 730309-730596   | hypothetical protein                          | 729223-729510   | + | 288 |
| 14028S  | STM14_0777      | 378449025 | + | 733102-733251   | hypothetical protein                          | 732016-732165   | + | 150 |
| 14028S  | STM14_0780      | 378449028 | + | 734838-734957   | hypothetical protein                          | 733752-733871   | + | 120 |
| 14028S  | STM14_0791      | 378449032 | + | 739310-739477   | hypothetical protein                          | 738224-738391   | + | 168 |
| 14028S  | STM14_0797      | 378449038 | + | 745470-745595   | hypothetical protein                          | 744384-744509   | + | 126 |
| 14028S  | STM14_0800      | 378449041 | + | 749621-749734   | hypothetical protein                          | 748535-748648   | + | 114 |
| 14028S  | STM14_0801      | 378449042 | + | 749864-750154   | hypothetical protein                          | 748778-749068   | + | 291 |
| 14028S  | STM14_0809      | 378449050 | + | 757442-757591   | hypothetical protein                          | 756356-756505   | + | 150 |
| 14028S  | STM14_0812      | 378449053 | + | 758607-758720   | hypothetical protein                          | 757521-757634   | + | 114 |
| 14028S  | STM14_0819      | 378449060 | + | 766193-766318   | hypothetical protein                          | 765107-765232   | + | 126 |
| 14028S  | STM14_0820      | 378449061 | + | 766472-766585   | hypothetical protein                          | 765386-765499   | + | 114 |
| 14028S  | STM14_0826      | 378449067 | + | 774532-774729   | K <sup>+</sup> -transporting ATPase subunit F | 773446-773643   | + | 198 |
| T000240 | STM00240_C07730 | 378983314 | - | 820062-820163   | hypothetical protein                          | 820643-780744   | - | 102 |
| 14028S  | STM14_0859      | 378449100 | + | 808472-808597   | hypothetical protein                          | 807386-807511   | + | 126 |
| ST474   | STM474_0763     | 379699951 | + | 807598-807723   | hypothetical protein                          | 807598-807723   | + | 126 |
| ST474   | STM474_0764     | 379699952 | + | 808597-808710   | hypothetical protein                          | 808597-808710   | + | 114 |
| 14028S  | STM14_0860      | 378449101 | - | 809819-809962   | hypothetical protein                          | 808733-808876   | - | 144 |
| 14028S  | STM14_0864      | 378449105 | + | 812877-813017   | hypothetical protein                          | 811791-811931   | + | 141 |
| 14028S  | STM14_0873      | 378449114 | + | 818715-819254   | hypothetical protein                          | 817629-818168   | + | 540 |
| 14028S  | STM14_0875      | 378449115 | + | 819027-820322   | hypothetical protein                          | 819341-819482   | + | 96  |
| 14028S  | STM14_0897      | 378449132 | + | 837473-837664   | hypothetical protein                          | 836389-836578   | + | 190 |
| 14028S  | STM14_0903      | 378449138 | + | 843123-843230   | hypothetical protein                          | 842037-842144   | + | 108 |
| ST474   | STM474_0818     | 379700001 | + | 857899-858006   | hypothetical protein                          | 857899-858006   | + | 114 |
| 14028S  | STM14_0924      | 378449158 | + | 864209-864493   | hypothetical protein                          | 863123-863407   | + | 285 |
| 14028S  | STM14_0925      | 378449159 | + | 864550-864777   | hypothetical protein                          | 863464-863691   | + | 228 |
| 14028S  | STM14_927       | 378449161 | + | 867104-867277   | putative cytoplasmic protein                  | 866018-866191   | + | 174 |
| 14028S  | STM14_946       | 378449180 | + | 881747-881884   | hypothetical protein                          | 879950-880087   | + | 138 |
| 14028S  | STM14_952       | 378449186 | + | 888006-888110   | hypothetical protein                          | 886209-886313   | + | 105 |
| 14028S  | STM14_956       | 378449190 | + | 891948-892067   | hypothetical protein                          | 890151-890270   | + | 120 |
| 14028S  | STM14_958       | 378449192 | + | 892325-892444   | hypothetical protein                          | 890528-890647   | + | 120 |
| 14028S  | STM14_961       | 378449195 | + | 895674-895811   | hypothetical protein                          | 893883-894020   | + | 138 |
| 14028S  | STM14_965       | 378449199 | + | 898059-898181   | hypothetical protein                          | 896268-896390   | + | 123 |
| 14028S  | STM14_967       | 378449201 | + | 899158-899316   | hypothetical protein                          | 897367-897525   | + | 159 |
| 14028S  | STM14_969       | 378449203 | + | 900254-900415   | hypothetical protein                          | 898463-898624   | + | 162 |
| 14028S  | STM14_970       | 378449204 | + | 900375-900506   | hypothetical protein                          | 898584-898715   | + | 132 |
| 14028S  | STM14_973       | 378449207 | + | 902910-903080   | hypothetical protein                          | 901119-901289   | + | 171 |
| 14028S  | STM14_974       | 378449208 | + | 903009-903137   | hypothetical protein                          | 901218-901346   | + | 129 |
| 14028S  | STM14_982       | 378449216 | + | 911396-911509   | hypothetical protein                          | 909605-909718   | + | 114 |
| 14028S  | STM14_986       | 378449220 | + | 915878-916033   | hypothetical protein                          | 914087-914242   | + | 156 |
| 14028S  | STM14_989       | 378449223 | + | 917997-918137   | hypothetical protein                          | 916206-916346   | + | 141 |
| 14028S  | STM14_995       | 378449232 | + | 924480-924599   | hypothetical protein                          | 922689-922808   | + | 120 |
| 14028S  | STM14_997       | 378449231 | + | 925933-926067   | hypothetical protein                          | 924142-924276   | + | 135 |
| 14028S  | STM14_999       | 378449233 | + | 926622-926762   | hypothetical protein                          | 924831-924971   | + | 141 |
| 14028S  | STM14_1000      | 378449234 | + | 926970-927134   | hypothetical protein                          | 925179-925343   | + | 165 |
| 14028S  | STM14_1006      | 378449239 | + | 931103-931243   | hypothetical protein                          | 929312-929452   | + | 141 |
| 14028S  | STM14_1010      | 378449243 | + | 934780-934917   | hypothetical protein                          | 932989-933126   | + | 138 |
| 14028S  | STM14_1019      | 378449251 | + | 942902-943027   | hypothetical protein                          | 941111-941236   | + | 126 |
| 14028S  | STM14_1034      | 378449266 | + | 955378-955569   | hypothetical protein                          | 953586-953777   | + | 192 |
| 14028S  | STM14_1038      | 378449270 | + | 958765-958965   | hypothetical protein                          | 956973-957173   | + | 201 |
| 14028S  | STM14_1053      | 378449285 | + | 972908-973111   | hypothetical protein                          | 971116-971319   | + | 204 |
| 14028S  | STM14_1055      | 378449287 | + | 973986-974153   | hypothetical protein                          | 972194-972361   | + | 168 |
| 14028S  | STM14_1060      | 378449292 | + | 980013-980138   | hypothetical protein                          | 978221-978346   | + | 126 |
| 14028S  | STM14_1061      | 378449293 | + | 980033-980176   | hypothetical protein                          | 978241-978384   | + | 144 |
| 14028S  | STM14_1067      | 378449299 | + | 984062-984343   | hypothetical protein                          | 982270-982551   | + | 282 |
| 14028S  | STM14_1069      | 378449301 | + | 985102-985260   | hypothetical protein                          | 983310-983468   | + | 159 |
| 14028S  | STM14_1081      | 378449312 | + | 994689-994946   | hypothetical protein                          | 992897-993154   | + | 258 |
| 14028S  | STM14_1082      | 378449313 | + | 994867-995142   | hypothetical protein                          | 993075-993350   | + | 276 |
| 14028S  | STM14_1087      | 378449318 | + | 1001941-1002111 | hypothetical protein                          | 1000149-1000319 | + | 171 |
| 14028S  | STM14_1092      | 378449323 | + | 1007647-1007754 | hypothetical protein                          | 1006295-1006592 | + | 108 |
| 14028S  | STM14_1093      | 378449324 | + | 1007837-1007968 | hypothetical protein                          | 1006045-1006392 | + | 108 |
| 14028S  | STM14_1102      | 378449333 | + | 1018831-1018959 | hypothetical protein                          | 1017039-1017167 | + | 119 |
| 14028S  | STM14_1104      | 378449335 | + | 1019641-1019754 | hypothetical protein                          | 1017849-1017962 | + | 124 |
| 14028S  | STM14_1108      | 378449339 | + | 1023127-1023381 | hypothetical protein                          | 1021335-1021589 | + | 255 |
| 14028S  | STM14_1118      | 378449349 | + | 1033792-1033944 | hypothetical protein                          | 1032000-1032152 | + | 153 |
| 14028S  | STM14_1129      | 378449360 | + | 1047995-1048126 | hypothetical protein                          | 1046203-1046334 | + | 132 |
| 14028S  | STM14_1131      | 378449362 | + | 1049521-1049673 | hypothetical protein                          | 1047729-1047881 | + | 153 |
| 14028S  | STM14_1133      | 378449364 | + | 1051307-1051426 | hypothetical protein                          | 1049515-1049634 | + | 120 |
| 14028S  | STM14_1135      | 378449366 | + | 1051897-1052118 | hypothetical protein                          | 1050105-1050326 | + | 222 |
| 14028S  | STM14_1137      | 378449368 | + | 1053504-1053662 | hypothetical protein                          | 1051712-1051870 | + | 159 |
| ST474   | STM474_0999     | 379700176 | + | 1061436-1061582 | hypothetical protein                          | 1061436-1061582 | + | 147 |
| ST474   | STM474_1001     | 379700178 | + | 1061983-1062096 | hypothetical protein                          | 1061983-1062096 | + | 114 |
| 14028S  | STM14_1149      | 378449380 | + | 1063939-1064178 | hypothetical protein                          | 1062147-1062386 | + | 240 |
| 14028S  | STM14_1157      | 378449388 | + | 1068009-1068230 | hypothetical protein                          | 1066217-1066438 | + | 222 |
| 14028S  | STM14_1159      | 378449390 | + | 1068921-1069121 | hypothetical protein                          | 1067129-1067329 | + | 201 |
| D23580  | STM00240_C1022  | 378444470 | + | 1114868-1115074 | prophage protein                              | 1075559-1075765 | + | 207 |
| 14028S  | STM14_1189      | 378449420 | + | 1094525-1094767 | hypothetical protein                          | 1092733-1092975 | + | 243 |
| ST474   | STM474_1045     | 379700222 | + | 1098631-1098666 | hypothetical protein                          | 1098511-1098666 | + | 126 |
| 14028S  | STM14_1201      | 378449431 | + | 1106320-1106445 | hypothetical protein                          | 1104297-1104422 | + | 156 |
| 14028S  | STM14_1209      | 378449439 | + | 1105818-1116021 | hypothetical protein                          | 1103796-1113999 | + | 204 |
| 14028S  | STM14_1216      | 378449446 | + | 1121248-1121352 | hypothetical protein                          | 1119226-1119330 | + | 105 |
| T000240 | STM00240_C11030 | 378983644 | + | 1169756-1169860 | hypothetical protein                          | 1128393-1128497 | + | 105 |
| 14028S  | STM14_1234      | 378449463 | + | 1135671-1135796 | hypothetical protein                          | 1133649-1133774 | + | 126 |
| 14028S  | STM14_1245      | 378449474 | + | 1143361-1143543 | hypothetical protein                          | 1141339-1141521 | + | 183 |
| 14028S  | STM14_1249      | 378449478 | + | 1146275-1146388 | hypothetical protein                          | 1144253-1144366 | + | 114 |
| 14028S  | STM14_1254      | 378449483 | + | 1150549-1150701 | hypothetical protein                          | 1148527-1148679 | + | 153 |
| 14028S  | STM14_1260      | 378449489 | + | 1155618-1155782 | hypothetical protein                          | 1153596-1153760 | + | 165 |
| 14028S  | STM14_1262      | 378449491 | + | 1156832-1156987 | hypothetical protein                          | 1154810-1154965 | + | 156 |
| 14028S  | STM14_1265      | 378449494 | + | 1158383-1158577 | hypothetical protein                          | 1156361-1156555 | + | 195 |
| 14028S  | STM14_1273      | 378449502 | + | 1164294-1164521 | hypothetical protein                          | 1162272-1162499 | + | 228 |
| 14028S  | STM14_1279      | 378449506 | + | 1170030-1170278 | hypothetical protein                          | 1168008-1168256 | + | 249 |
| 14028S  | STM14_1280      | 378449507 | + | 1170167-1170286 | hypothetical protein                          | 1168145-1168264 | + | 120 |
| 14028S  | STM14_1282      | 378449509 | + | 1172347-1172457 | hypothetical protein                          | 1170325-1170435 | + | 111 |
| 14028S  | STM14_1283      | 378449510 | + | 1172451-1172747 | hypothetical protein                          | 1170429-1170725 | + | 297 |
| 14028S  | STM14_1286      | 378449512 | + | 1174679-1174783 | hypothetical protein                          | 1172657-1172761 | + | 105 |
| 14028S  | STM14_1288      | 378449514 | + | 1176314-1176421 | hypothetical protein                          | 1174292-1174399 | + | 108 |
| 14028S  | STM14_1289      | 378449515 | + | 1176396-1176605 | hypothetical protein                          | 1174374-1174583 | + | 210 |
| 14028S  | STM14_1291      | 378449517 | + | 1177413-1177520 | hypothetical protein                          | 1175391-1175498 | + | 108 |
| 14028S  | STM14_1292      | 378449518 | + | 1177573-1177704 | hypothetical protein                          | 1175551-1175682 | + | 132 |

|         |                |           |   |                 |                                                       |                 |   |     |
|---------|----------------|-----------|---|-----------------|-------------------------------------------------------|-----------------|---|-----|
| 140285  | STM14_1298     | 378449523 | - | 1183064-1183228 | hypothetical protein                                  | 1181042-1181206 | - | 165 |
| 140285  | STM14_1307     | 378449532 | - | 1188559-1188696 | hypothetical protein                                  | 1186537-1186674 | - | 138 |
| 140285  | STM14_1308     | 378449533 | - | 1188894-1189040 | hypothetical protein                                  | 1186872-1187018 | - | 147 |
| 140285  | STM14_1316     | 378449541 | - | 1194339-1194509 | hypothetical protein                                  | 1192318-1192488 | - | 171 |
| 140285  | STM14_1322     | 378449547 | + | 1200601-1201062 | hypothetical protein                                  | 1198580-1199041 | + | 462 |
| 140285  | STM14_1327     | 378449552 | + | 1204177-1204380 | hypothetical protein                                  | 1202156-1202359 | + | 204 |
| 140285  | STM14_1339     | 378449564 | + | 1212983-1213159 | hypothetical protein                                  | 1210962-1211138 | - | 177 |
| 140285  | STM14_1344     | 378449569 | + | 1216241-1216396 | flagellin basal body P-ring biosynthesis protein FlaG | 1214420-1214373 | - | 156 |
| 140285  | STM14_1356     | 378449581 | - | 1226285-1226474 | hypothetical protein                                  | 1224259-1224403 | - | 185 |
| 140285  | STM14_1376     | 378449600 | - | 1244261-1244398 | hypothetical protein                                  | 1242240-1242377 | - | 138 |
| 140285  | STM14_1390     | 378449614 | - | 1256910-1257065 | hypothetical protein                                  | 1254889-1255044 | - | 156 |
| 140285  | STM14_1399     | 378449623 | - | 1267794-1267916 | hypothetical protein                                  | 1265773-1265895 | - | 123 |
| 140285  | STM14_1401     | 378449625 | - | 1269076-1269240 | hypothetical protein                                  | 1267055-1267219 | - | 165 |
| 140285  | STM14_1487     | 378449708 | - | 1337214-1337372 | hypothetical protein                                  | 1284092-1284250 | - | 159 |
| 140285  | STM14_1488     | 378449709 | + | 1337312-1337452 | hypothetical protein                                  | 1284190-1284330 | + | 141 |
| 140285  | STM14_1489     | 378449710 | + | 1337337-1337585 | hypothetical protein                                  | 1284215-1284463 | + | 249 |
| LT2     | STM05040       | 409994415 | - | 1327664-1327867 | hypothetical protein                                  | 1284517-1284720 | - | 204 |
| 140285  | STM14_1494     | 378449714 | - | 1340405-1340575 | hypothetical protein                                  | 1287283-1287453 | - | 171 |
| 140285  | STM14_1496     | 378449716 | - | 1341060-1341188 | hypothetical protein                                  | 1287938-1288066 | - | 129 |
| 140285  | STM14_1499     | 378449718 | + | 1341718-1341825 | hypothetical protein                                  | 1288596-1288703 | + | 108 |
| 140285  | STM14_1500     | 378449719 | - | 1342043-1342192 | hypothetical protein                                  | 1288921-1289070 | - | 150 |
| 140285  | STM14_1502     | 378449721 | - | 1342962-1343096 | hypothetical protein                                  | 1289840-1289974 | - | 135 |
| 140285  | STM14_1506     | 378449723 | - | 1344493-1344636 | hypothetical protein                                  | 1291371-1291514 | - | 144 |
| 140285  | STM14_1507     | 378449724 | + | 1344742-1344867 | putative lipoprotein                                  | 1291620-1291745 | + | 126 |
| ST474   | STM474_1249    | 379700419 | - | 1291877-1292050 | hypothetical protein                                  | 1291877-1292050 | - | 174 |
| 140285  | STM14_1510     | 378449727 | - | 1346067-1346216 | putative inner membrane protein                       | 1292945-1293094 | - | 150 |
| 140285  | STM14_1514     | 378449731 | - | 1348508-1348666 | hypothetical protein                                  | 1295386-1295544 | - | 159 |
| 140285  | STM14_1524     | 378449740 | - | 1356451-1356600 | hypothetical protein                                  | 1303329-1303478 | - | 150 |
| 140285  | STM14_1528     | 378449744 | + | 1362977-1362977 | hypothetical protein                                  | 1303585-1303607 | + | 225 |
| 140285  | STM14_1537     | 378449749 | - | 1361225-1361380 | hypothetical protein                                  | 1308103-1308258 | - | 156 |
| 140285  | STM14_1536     | 378449752 | - | 1362034-1362159 | hypothetical protein                                  | 1308911-1309036 | - | 126 |
| 140285  | STM14_1540     | 378449756 | - | 1363413-1363529 | hypothetical protein                                  | 1310290-1310406 | - | 117 |
| 140285  | STM14_1541     | 378449757 | - | 1363501-1363599 | hypothetical protein                                  | 1310378-1310476 | - | 99  |
| 140285  | STM14_1545     | 378449761 | - | 1364743-1364856 | hypothetical protein                                  | 1311620-1311733 | - | 114 |
| 140285  | STM14_1546     | 378449762 | + | 1364774-1364911 | hypothetical protein                                  | 1311651-1311788 | + | 138 |
| 140285  | STM14_1550     | 378449766 | + | 1367385-1367522 | hypothetical protein                                  | 1314262-1314399 | + | 138 |
| 140285  | STM14_1551     | 378449767 | + | 1367589-1367696 | putative inner membrane protein                       | 1314466-1314573 | + | 108 |
| 140285  | STM14_1554     | 378449770 | + | 1370048-1370245 | hypothetical protein                                  | 1316925-1317122 | + | 192 |
| 140285  | STM14_1555     | 378449771 | + | 1370136-1370267 | salivary secreted protein                             | 1317013-1317144 | + | 138 |
| 140285  | STM14_1557     | 378449773 | + | 1371682-1371801 | hypothetical protein                                  | 1318559-1318678 | + | 120 |
| ST474   | STM474_1289    | 379700457 | + | 1320526-1320669 | hypothetical protein                                  | 1320526-1320669 | + | 144 |
| 140285  | STM14_1559     | 378449775 | - | 1373854-1374027 | hypothetical protein                                  | 1320730-1320903 | - | 174 |
| 140285  | STM14_1566     | 378449782 | + | 1379655-1379795 | hypothetical protein                                  | 1326531-1326671 | + | 141 |
| 140285  | STM14_1569     | 378449785 | + | 1380898-1381002 | hypothetical protein                                  | 1327775-1327879 | + | 105 |
| 140285  | STM14_1572     | 378449788 | + | 1382785-1382889 | hypothetical protein                                  | 1329662-1329766 | + | 105 |
| 140285  | STM14_1581     | 378449797 | + | 1391859-1392038 | hypothetical protein                                  | 1338736-1338915 | + | 180 |
| 140285  | STM14_1587     | 378449803 | + | 1398234-1398449 | hypothetical protein                                  | 1345111-1345226 | + | 216 |
| ST474   | STM474_1315    | 379700483 | + | 1347752-1347886 | hypothetical protein                                  | 1347752-1347886 | + | 135 |
| 140285  | STM14_1591     | 378449807 | + | 1400923-1401129 | hypothetical protein                                  | 1347800-1348006 | + | 207 |
| 140285  | STM14_1593     | 378449809 | + | 1401610-1401732 | hypothetical protein                                  | 1348487-1348609 | + | 123 |
| 140285  | STM14_1601     | 378449817 | + | 1409372-1409509 | hypothetical protein                                  | 1356249-1356386 | + | 138 |
| 140285  | STM14_1602     | 378449818 | - | 1409399-1409647 | hypothetical protein                                  | 1356276-1356524 | - | 249 |
| 140285  | STM14_1617     | 378449833 | + | 1421769-1421954 | hypothetical protein                                  | 1368646-1368831 | + | 186 |
| 140285  | STM14_1618     | 378449834 | + | 1421956-1422090 | hypothetical protein                                  | 1368833-1368967 | + | 135 |
| 140285  | STM14_1623     | 378449839 | - | 1425398-1425562 | hypothetical protein                                  | 1372275-1372439 | - | 165 |
| 140285  | STM14_1631     | 378449847 | - | 1432577-1432696 | hypothetical protein                                  | 1379454-1379573 | - | 120 |
| 140285  | STM14_1636     | 378449852 | + | 1436467-1436571 | hypothetical protein                                  | 1383344-1383448 | + | 105 |
| ST474   | STM474_1353    | 379700521 | + | 1384122-1384307 | hypothetical protein                                  | 1384122-1384307 | + | 186 |
| 140285  | STM14_1638     | 378449854 | - | 1437586-1437699 | hypothetical protein                                  | 1384463-1384576 | - | 114 |
| 140285  | STM14_1645     | 378449861 | - | 1445506-1445658 | hypothetical protein                                  | 1392383-1392535 | - | 153 |
| 140285  | STM14_1652     | 378449868 | + | 1452598-1452744 | hypothetical protein                                  | 1399474-1399620 | + | 147 |
| 140285  | STM14_1653     | 378449869 | - | 1452728-1452838 | hypothetical protein                                  | 1399604-1399714 | - | 111 |
| 140285  | STM14_1658     | 378449873 | - | 1456308-1456475 | hypothetical protein                                  | 1403184-1403351 | - | 168 |
| ST474   | STM474_1383    | 379700550 | + | 1418471-1418587 | hypothetical protein                                  | 1418471-1418587 | + | 117 |
| ST474   | STM474_1395    | 379700562 | + | 1431868-1432002 | hypothetical protein                                  | 1431868-1432002 | + | 135 |
| 140285  | STM14_1685     | 378449900 | - | 1486016-1486129 | hypothetical protein                                  | 1432892-1433005 | - | 114 |
| 140285  | STM14_1692     | 378449907 | + | 1493140-1493517 | hypothetical protein                                  | 1440286-1440393 | + | 108 |
| 140285  | STM14_1719     | 378449934 | + | 1511477-1511603 | hypothetical protein                                  | 1548662-1548779 | + | 126 |
| 140285  | STM14_1728     | 378449943 | + | 1519191-1519352 | hypothetical protein                                  | 1466047-1466328 | + | 281 |
| 140285  | STM14_1751     | 378449964 | + | 1538110-1538277 | hypothetical protein                                  | 1484986-1485153 | + | 168 |
| 140285  | STM14_1761     | 410023179 | - | 1546024-1546179 | hypothetical protein                                  | 1492900-1493055 | - | 156 |
| 140285  | STM14_1764     | 378449977 | + | 1548438-1548683 | hypothetical protein                                  | 1495314-1495559 | + | 246 |
| 140285  | STM14_1771     | 378449982 | + | 1553745-1553906 | fumarase A                                            | 1500621-1500782 | + | 162 |
| 140285  | STM14_1776     | 378449987 | - | 1559385-1559690 | outer membrane protein                                | 1506261-1506566 | - | 306 |
| 140285  | STM14_1782     | 378449992 | - | 1563882-1564016 | putative amino acid permease                          | 1510758-1510892 | - | 135 |
| 140285  | STM14_1783     | 378449993 | - | 1563914-1564087 | hypothetical protein                                  | 1510790-1510963 | - | 174 |
| 140285  | STM14_1784     | 378449994 | + | 1564099-1564224 | hypothetical protein                                  | 1510975-1511100 | + | 126 |
| 140285  | STM14_1786     | 378449996 | + | 1565234-1565359 | hypothetical protein                                  | 1512110-1512235 | + | 126 |
| 140285  | STM14_1790     | 378450000 | + | 1569946-1570116 | hypothetical protein                                  | 1516822-1516992 | + | 171 |
| 140285  | STM14_1794     | 378450004 | - | 1571734-1572027 | hypothetical protein                                  | 1518610-1518903 | - | 294 |
| 140285  | STM14_1796     | 378450006 | - | 1572462-1572653 | hypothetical protein                                  | 1519338-1519529 | - | 192 |
| T000240 | STMDT12_C14990 | 378984040 | + | 1560231-1560323 | hypothetical protein                                  | 1519396-1519488 | + | 92  |
| 140285  | STM14_1810     | 378450020 | - | 1586812-1587033 | putative dimethyl sulfoxide reductase subunit A       | 1533688-1533909 | - | 223 |
| 140285  | STM14_1816     | 378450026 | - | 1591641-1591757 | hypothetical protein                                  | 1538517-1538633 | - | 117 |
| ST474   | STM474_1518    | 379700677 | - | 1542834-1542947 | hypothetical protein                                  | 1542834-1542947 | - | 114 |
| 140285  | STM14_1827     | 378450036 | - | 1601704-1601919 | hypothetical protein                                  | 1548580-1548795 | - | 218 |
| 140285  | STM14_1828     | 378450037 | + | 1601786-1601923 | peptidyl-dipeptidase dcp                              | 1548662-1548779 | + | 136 |
| 140285  | STM14_1831     | 378450040 | - | 1602670-1603068 | hypothetical protein                                  | 1549846-1549994 | - | 209 |
| 140285  | STM14_1833     | 378450042 | - | 1603865-1604014 | hypothetical protein                                  | 1550741-1550890 | - | 150 |
| T000240 | STMDT12_C15130 | 378984072 | - | 1591761-1591856 | hypothetical protein                                  | 1550924-1551019 | - | 96  |
| 140285  | STM14_1847     | 378450056 | - | 1615524-1615850 | putative inner membrane protein                       | 1562400-1562726 | + | 327 |
| 140285  | STM14_1858     | 378450067 | - | 1625009-1625161 | hypothetical protein                                  | 1571885-1572037 | - | 153 |
| 140285  | STM14_1867     | 378450076 | - | 1634718-1634879 | hypothetical protein                                  | 1581594-1581755 | - | 162 |
| 140285  | STM14_1872     | 378450081 | + | 1637216-1637431 | putative phage-related secreted protein               | 1584092-1584307 | + | 216 |
| UK1     | STMUK_1520     | 378988892 | + | 1587048-1587440 | hypothetical protein                                  | 1585733-1586125 | + | 393 |
| UK1     | STMUK_1521     | 378988893 | + | 1587577-1587705 | hypothetical protein                                  | 1586262-1586390 | + | 129 |
| 140285  | STM14_1876     | 378450084 | - | 1639903-1640112 | hypothetical protein                                  | 1586779-1586988 | - | 210 |
| ST474   | STM474_1578    | 379700736 | - | 1602385-1602519 | hypothetical protein                                  | 1602385-1602519 | - | 135 |
| 140285  | STM14_1890     | 378450098 | + | 1657503-1657634 | hypothetical protein                                  | 1604379-1604510 | + | 132 |
| 140285  | STM14_1895     | 378450103 | + | 1663489-1663641 | hypothetical protein                                  | 1610365-1610517 | + | 153 |
| 140285  | STM14_1897     | 378450105 | - | 1664885-1665067 | hypothetical protein                                  | 1611761-1611943 | - | 183 |
| 140285  | STM14_1902     | 378450110 | + | 1668962-1669093 | hypothetical protein                                  | 1615838-1615969 | + | 132 |
| 140285  | STM14_1904     | 378450112 | - | 1670559-1670702 | hypothetical protein                                  | 1617435-1617578 | - | 144 |
| 140285  | STM14_1911     | 378450119 | - | 1679194-1679457 | hypothetical protein                                  | 1626070-1626333 | - | 264 |
| 140285  | STM14_1913     | 378450121 | + | 1680178-1680390 | hypothetical protein                                  | 1627054-1627266 | + | 213 |
| 140285  | STM14_1914     | 378450122 | + | 1680335-1680472 | hypothetical protein                                  | 1627211-1627348 | + | 138 |
| 140285  | STM14_1915     | 378450123 | + | 1680342-1680476 | hypothetical protein                                  | 1627218-1627352 | + | 135 |

|         |                |           |   |                 |                                 |                 |   |     |
|---------|----------------|-----------|---|-----------------|---------------------------------|-----------------|---|-----|
| 140285  | STM14_1919     | 378450127 | - | 1683664-1683783 | hypothetical protein            | 1630540-1630659 | - | 120 |
| 140285  | STM14_1922     | 378450130 | + | 1686850-1686969 | hypothetical protein            | 1633726-1633845 | + | 120 |
| 140285  | STM14_1923     | 378450131 | + | 1686958-1687080 | hypothetical protein            | 1633834-1633956 | + | 123 |
| 140285  | STM14_1932     | 410023183 | + | 1696611-1696706 | hypothetical protein            | 1643487-1643582 | + | 96  |
| 140285  | STM14_1933     | 378450141 | + | 1696703-1696807 | hypothetical protein            | 1643579-1643683 | + | 105 |
| 140285  | STM14_1939     | 378450147 | + | 1701681-1701785 | hypothetical protein            | 1648557-1648661 | + | 105 |
| 140285  | STM14_1950     | 378450158 | + | 1711642-1711749 | hypothetical protein            | 1658518-1658625 | + | 108 |
| 140285  | STM14_1961     | 378450169 | + | 1719701-1719814 | hypothetical protein            | 1666577-1666690 | + | 114 |
| 140285  | STM14_1967     | 378450173 | + | 1721480-1721695 | hypothetical protein            | 1674356-1674571 | + | 216 |
| T000240 | STMDT12_C16480 | 378984189 | + | 1717552-1717677 | hypothetical protein            | 1676714-1676839 | + | 126 |
| ST474   | STM474_1641    | 379700799 | + | 1676859-1677014 | hypothetical protein            | 1676859-1677014 | + | 156 |
| 140285  | STM14_1972     | 378450180 | + | 1731028-1731132 | hypothetical protein            | 1677904-1678008 | + | 105 |
| 140285  | STM14_1973     | 378450181 | + | 1731115-1731225 | hypothetical protein            | 1677991-1678101 | + | 111 |
| 140285  | STM14_1976     | 378450184 | + | 1733662-1733814 | hypothetical protein            | 1680538-1680690 | + | 153 |
| T000240 | STMDT12_C16570 | 378984198 | + | 1726118-1726213 | hypothetical protein            | 1685280-1685375 | + | 96  |
| 140285  | STM14_1996     | 378450204 | + | 1755685-1755894 | hypothetical protein            | 1702561-1702770 | + | 210 |
| T000240 | STMDT12_C16740 | 378984215 | + | 1744637-1744789 | hypothetical protein            | 1703799-1703951 | + | 153 |
| 140285  | STM14_2004     | 378450212 | + | 1762419-1762580 | hypothetical protein            | 1709295-1709456 | + | 162 |
| 140285  | STM14_2024     | 378450229 | + | 1779789-1779902 | hypothetical protein            | 1726665-1726778 | + | 114 |
| 140285  | STM14_2048     | 378450253 | + | 1800491-1800637 | hypothetical protein            | 1746655-1746801 | + | 147 |
| 140285  | STM14_2049     | 378450254 | + | 1800647-1800769 | hypothetical protein            | 1746811-1746933 | + | 123 |
| 140285  | STM14_2054     | 378450259 | + | 1803682-1803798 | hypothetical protein            | 1749846-1749962 | + | 117 |
| 140285  | STM14_2057     | 378450262 | + | 1807079-1807216 | hypothetical protein            | 1753243-1753380 | + | 138 |
| 140285  | STM14_2061     | 378450266 | + | 1810467-1810628 | hypothetical protein            | 1756631-1756792 | + | 162 |
| 140285  | STM14_2065     | 378450270 | + | 1812029-1812142 | hypothetical protein            | 1758193-1758306 | + | 114 |
| 140285  | STM14_2071     | 378450276 | + | 1818504-1818674 | hypothetical protein            | 1764668-1764838 | + | 171 |
| ST474   | ymia           | 379700885 | + | 1764839-1764967 | hypothetical protein            | 1764839-1764967 | + | 129 |
| 140285  | STM14_2073     | 378450278 | + | 1820026-1820190 | hypothetical protein            | 1766190-1766354 | + | 165 |
| 140285  | STM14_2076     | 378450281 | + | 1823233-1823364 | hypothetical protein            | 1769397-1769528 | + | 132 |
| 140285  | STM14_2079     | 378450284 | + | 1824904-1825014 | hypothetical protein            | 1771068-1771178 | + | 111 |
| 140285  | trpI           | 378450289 | + | 1829100-1829144 | trp operon leader peptide       | 1775264-1775308 | + | 45  |
| 140285  | STM14_2102     | 378450306 | + | 1843241-1843414 | hypothetical protein            | 1789405-1789578 | + | 174 |
| 140285  | STM14_2117     | 378450320 | + | 1858398-1858580 | hypothetical protein            | 1804562-1804744 | + | 183 |
| 140285  | STM14_2123     | 378450326 | + | 1863160-1863279 | hypothetical protein            | 1809324-1809443 | + | 120 |
| 140285  | STM14_2128     | 378450328 | + | 1865980-1866144 | hypothetical protein            | 1812144-1812308 | + | 165 |
| 140285  | STM14_2133     | 378450333 | + | 1872924-1873043 | hypothetical protein            | 1819088-1819207 | + | 120 |
| 140285  | STM14_2135     | 378450335 | + | 1874718-1874903 | hypothetical protein            | 1820882-1821067 | + | 186 |
| 140285  | STM14_2148     | 378450348 | + | 1886567-1886695 | hypothetical protein            | 1832731-1832859 | + | 129 |
| 140285  | STM14_2151     | 378450351 | + | 1888181-1888351 | hypothetical protein            | 1834345-1834515 | + | 171 |
| 140285  | STM14_2152     | 378450352 | + | 1888329-1888433 | hypothetical protein            | 1834493-1834597 | + | 105 |
| 140285  | STM14_2158     | 378450358 | + | 1893588-1893701 | hypothetical protein            | 1839752-1839865 | + | 114 |
| 140285  | STM14_2160     | 378450360 | + | 1895293-1895421 | hypothetical protein            | 1841457-1841585 | + | 129 |
| 140285  | STM14_2171     | 378450371 | + | 1905555-1905662 | hypothetical protein            | 1851719-1851826 | + | 108 |
| 140285  | STM14_2180     | 378450380 | + | 1914824-1914934 | hypothetical protein            | 1860988-1861098 | + | 111 |
| 140285  | STM14_2187     | 378450387 | + | 1920441-1920557 | hypothetical protein            | 1866605-1866721 | + | 117 |
| 140285  | STM14_2189     | 378450389 | + | 1920801-1920899 | hypothetical protein            | 1866965-1867063 | + | 99  |
| 140285  | STM14_2200     | 378450400 | + | 1928329-1928535 | hypothetical protein            | 1874492-1874698 | + | 207 |
| 140285  | STM14_2211     | 378450411 | + | 1939453-1939788 | putative cytoplasmic protein    | 1885616-1885951 | + | 336 |
| 140285  | STM14_2219     | 378450419 | + | 1946749-1946859 | hypothetical protein            | 1892912-1893032 | + | 111 |
| 140285  | STM14_2222     | 378450422 | + | 1947434-1947541 | hypothetical protein            | 1893597-1893704 | + | 108 |
| 140285  | STM14_2223     | 378450423 | + | 1947556-1947696 | hypothetical protein            | 1893719-1893859 | + | 141 |
| 140285  | STM14_2224     | 378450424 | + | 1947624-1947740 | hypothetical protein            | 1893787-1893903 | + | 117 |
| T000240 | STMDT12_C18620 | 378984403 | + | 1934900-1935001 | hypothetical protein            | 1895123-1895224 | + | 102 |
| 140285  | STM14_2229     | 378450429 | + | 1949871-1949978 | hypothetical protein            | 1896034-1896141 | + | 108 |
| 140285  | STM14_2238     | 378450438 | + | 1961391-1961522 | hypothetical protein            | 1907554-1907685 | + | 132 |
| ST474   | STM474_1877    | 379701031 | + | 1908925-1909098 | hypothetical protein            | 1908925-1909098 | + | 174 |
| 140285  | STM14_2243     | 378450443 | + | 1963183-1963311 | hypothetical protein            | 1909346-1909474 | + | 129 |
| 140285  | STM14_2245     | 378450445 | + | 1964429-1964551 | hypothetical protein            | 1910592-1910714 | + | 123 |
| 140285  | STM14_2246     | 378450446 | + | 1964644-1964787 | hypothetical protein            | 1910807-1910950 | + | 144 |
| D23580  | STM14_18461    | 378445260 | + | 1947071-1947241 | hypothetical protein            | 1911409-1911579 | + | 171 |
| 140285  | STM14_2250     | 378450450 | + | 1966960-1967154 | hypothetical protein            | 1913123-1913317 | + | 195 |
| ST474   | STM474_1884    | 379701038 | + | 1913724-1913852 | hypothetical protein            | 1913724-1913852 | + | 129 |
| 140285  | STM14_2260     | 378450457 | + | 1973190-1973366 | hypothetical protein            | 1919353-1919529 | + | 177 |
| 140285  | STM14_2261     | 378450458 | + | 1973229-1973375 | hypothetical protein            | 1919392-1919538 | + | 147 |
| ST474   | STM474_1893    | 379701046 | + | 1920052-1920177 | arsenical pump membrane protein | 1920052-1920177 | + | 126 |
| 140285  | STM14_2263     | 378450459 | + | 1973981-1974151 | hypothetical protein            | 1920144-1920314 | + | 171 |
| 140285  | STM14_2264     | 378450460 | + | 1974277-1974393 | tail fiber assembly protein     | 1920404-1920556 | + | 117 |
| 140285  | STM14_2268     | 378450464 | + | 1976735-1976723 | hypothetical protein            | 1922386-1922586 | + | 189 |
| 140285  | STM14_2270     | 378450466 | + | 1976705-1976788 | hypothetical protein            | 1922868-1923041 | + | 178 |
| 140285  | STM14_2271     | 378450467 | + | 1976808-1976927 | hypothetical protein            | 1922971-1923090 | + | 120 |
| 140285  | STM14_2276     | 378450471 | + | 1979312-1979440 | hypothetical protein            | 1925475-1925603 | + | 129 |
| 140285  | STM14_2277     | 378450472 | + | 1979524-1979643 | putative cytoplasmic protein    | 1925687-1925806 | + | 120 |
| T000240 | STMDT12_C19080 | 378984449 | + | 1972383-1972478 | hypothetical protein            | 1934410-1934505 | + | 96  |
| 140285  | STM14_2291     | 378450486 | + | 1990827-1990885 | hypothetical protein            | 1936990-1937148 | + | 159 |
| 140285  | STM14_2293     | 378450488 | + | 1992662-1992787 | hypothetical protein            | 1938825-1938950 | + | 126 |
| 140285  | STM14_2294     | 378450489 | + | 1992755-1992874 | hypothetical protein            | 1938918-1939037 | + | 120 |
| 140285  | STM14_2298     | 378450493 | + | 1996367-1996594 | hypothetical protein            | 1942530-1942757 | + | 228 |
| 140285  | STM14_2305     | 378450500 | + | 2002147-2002269 | hypothetical protein            | 1948310-1948432 | + | 123 |
| 140285  | STM14_2306     | 378450501 | + | 2002264-2002389 | hypothetical protein            | 1948427-1948552 | + | 126 |
| 140285  | STM14_2313     | 378450507 | + | 2008446-2008562 | hypothetical protein            | 1954609-1954725 | + | 117 |
| 140285  | STM14_2321     | 378450515 | + | 2013869-2013985 | hypothetical protein            | 1960032-1960148 | + | 117 |
| 140285  | STM14_2323     | 378450517 | + | 2015793-2015897 | hypothetical protein            | 1961956-1962060 | + | 105 |
| 140285  | STM14_2329     | 378450523 | + | 2022930-2023187 | hypothetical protein            | 1969093-1969350 | + | 258 |
| 140285  | STM14_2339     | 378450533 | + | 2032400-2032531 | hypothetical protein            | 1978563-1978694 | + | 132 |
| 140285  | STM14_2342     | 378450536 | + | 2033684-2033827 | hypothetical protein            | 1979847-1979990 | + | 144 |
| 140285  | STM14_2343     | 378450537 | + | 2034145-2034261 | hypothetical protein            | 1980308-1980424 | + | 117 |
| 140285  | STM14_2349     | 378450542 | + | 2038156-2038305 | hypothetical protein            | 1984319-1984468 | + | 150 |
| T000240 | STMDT12_C19550 | 378984453 | + | 2022485-2022580 | hypothetical protein            | 1984512-1984657 | + | 96  |
| D23580  | STM14_19262    | 378445334 | + | 2022476-2022553 | hypothetical protein            | 1996534-1996611 | + | 78  |
| 140285  | STM14_2366     | 378450556 | + | 2050620-2050775 | putative inner membrane protein | 1996783-1996938 | + | 156 |
| 140285  | STM14_2379     | 378450569 | + | 2060568-2060705 | hypothetical protein            | 2006731-2006868 | + | 138 |
| 140285  | STM14_2389     | 378450579 | + | 2067774-2067902 | hypothetical protein            | 2013937-2014065 | + | 129 |
| 140285  | STM14_2411     | 378450600 | + | 2084253-2084468 | hypothetical protein            | 2030416-2030631 | + | 216 |
| ST474   | STM474_2026    | 379701174 | + | 2034563-2034694 | hypothetical protein            | 2034563-2034694 | + | 132 |
| 140285  | STM14_2417     | 378450606 | + | 2088483-2088962 | hypothetical protein            | 2035006-2035125 | + | 213 |
| 140285  | STM14_2419     | 378450608 | + | 2090431-2090643 | putative cold-shock protein     | 2036594-2036806 | + | 210 |
| 140285  | STM14_2421     | 378450610 | + | 2091089-2091208 | hypothetical protein            | 2037252-2037371 | + | 120 |
| 140285  | STM14_2429     | 378450617 | + | 2095348-2095497 | hypothetical protein            | 2041511-2041660 | + | 150 |
| 140285  | STM14_2442     | 378450629 | + | 2106970-2107134 | hypothetical protein            | 2053134-2053298 | + | 165 |
| 140285  | STM14_2451     | 378450638 | + | 2112246-2112428 | hypothetical protein            | 2058410-2058592 | + | 183 |
| 140285  | STM14_2456     | 378450643 | + | 2115612-2115710 | hypothetical protein            | 2061776-2061874 | + | 99  |
| 140285  | STM14_2461     | 378450648 | + | 2117839-2117967 | hypothetical protein            | 2064003-2064131 | + | 129 |
| D23580  | STM14_20121    | 378445417 | + | 2090064-2090498 | phage protein                   | 2064124-2064558 | + | 435 |
| 140285  | STM14_2466     | 378450653 | + | 2112122-2112161 | crossover junction protein      | 2067386-2067775 | + | 390 |
| 140285  | STM14_2470     | 378450657 | + | 2123800-2124024 | hypothetical protein            | 2069964-2070188 | + | 225 |
| 140285  | STM14_2478     | 378450665 | + | 2125952-2125923 | hypothetical protein            | 2075757-2075987 | + | 231 |
| T000240 | STMDT12_C20240 | 378984563 | + | 2079358-2079462 | hypothetical protein            | 2081532-2081636 | + | 105 |

|         |                |             |           |                 |                                                 |                      |                 |     |    |
|---------|----------------|-------------|-----------|-----------------|-------------------------------------------------|----------------------|-----------------|-----|----|
| ST474   | STM474_2085    | 379701227   | -         | 2082744-2082878 | hypothetical protein                            | 2082744-2082878      | -               | 135 |    |
| ST474   | STM474_2089    | 379701231   | +         | 2088148-2088282 | hypothetical protein                            | 2088148-2088282      | +               | 135 |    |
|         | 798            | UMN798_2172 | 383496723 | +               | 2087536-2087634                                 | hypothetical protein | 2088175-2088273 | -   | 99 |
| 140285  | STM14_2493     | 378450677   | +         | 2142163-2142336 | hypothetical protein                            | 2088327-2088500      | +               | 174 |    |
| T000240 | STMDT12_C20320 | 378984573   | +         | 2086418-2086567 | hypothetical protein                            | 2088592-2088841      | +               | 150 |    |
| ST474   | STM474_2091    | 379701233   | +         | 2088820-2088942 | hypothetical protein                            | 2088820-2088942      | +               | 123 |    |
| D23580  | STMWV_20421    | 378445447   | +         | 2116462-2116623 | hypothetical protein                            | 2090522-2090683      | +               | 162 |    |
| 140285  | STM14_2501     | 378450684   | +         | 2147387-2147539 | hypothetical protein                            | 2093551-2093703      | -               | 153 |    |
| 140285  | STM14_2524     | 378450706   | +         | 2165668-2165799 | hypothetical protein                            | 2111832-2111983      | +               | 132 |    |
| 140285  | STM14_2549     | 378450731   | +         | 2185570-2185701 | hypothetical protein                            | 2131733-2131884      | +               | 132 |    |
| 140285  | STM14_2556     | 378450738   | +         | 2192950-2193219 | hypothetical protein                            | 2139113-2139282      | -               | 270 |    |
| 140285  | STM14_2558     | 378450740   | +         | 2195674-2195796 | hypothetical protein                            | 2141837-2141959      | -               | 123 |    |
| 140285  | STM14_2561     | 378450743   | +         | 2198729-2198896 | hypothetical protein                            | 2144892-2145059      | +               | 168 |    |
| 140285  | STM14_2562     | 378450744   | +         | 2198740-2198937 | hypothetical protein                            | 2144903-2145100      | -               | 198 |    |
| 140285  | STM14_2599     | 378450781   | +         | 2239941-2240216 | hypothetical protein                            | 2186104-2186279      | +               | 276 |    |
| 140285  | STM14_2614     | 378450796   | +         | 2254277-2254522 | hypothetical protein                            | 2200440-2200685      | +               | 246 |    |
| 140285  | STM14_2619     | 378450801   | +         | 2259828-2259998 | hypothetical protein                            | 2205991-2206161      | -               | 171 |    |
| 140285  | STM14_2623     | 378450805   | +         | 2265633-2265749 | hypothetical protein                            | 2211796-2211912      | -               | 117 |    |
| 140285  | STM14_2635     | 378450816   | +         | 2282708-2282821 | hypothetical protein                            | 2228871-2228984      | -               | 114 |    |
| 140285  | STM14_2639     | 378450819   | +         | 2285114-2285233 | hypothetical protein                            | 2232177-2231396      | +               | 120 |    |
| 140285  | STM14_2649     | 378450829   | +         | 2293497-2293682 | hypothetical protein                            | 2239660-2239845      | -               | 186 |    |
| 140285  | STM14_2651     | 378450831   | -         | 2294185-2294343 | hypothetical protein                            | 2240348-2240506      | -               | 159 |    |
| ST474   | STM474_2254    | 379701393   | +         | 2258581-2258763 | hypothetical protein                            | 2258581-2258763      | +               | 183 |    |
| 140285  | STM14_2671     | 378450851   | +         | 2315124-2315237 | hypothetical protein                            | 2261287-2261400      | -               | 114 |    |
| 140285  | STM14_2674     | 378450854   | +         | 2317916-2318191 | hypothetical protein                            | 2264079-2264354      | -               | 276 |    |
| 140285  | STM14_2676     | 378450856   | +         | 2318810-2318917 | hypothetical protein                            | 2264973-2265080      | +               | 108 |    |
| 140285  | STM14_2680     | 378450860   | +         | 2322009-2322206 | hypothetical protein                            | 2268172-2268369      | +               | 198 |    |
| 140285  | STM14_2697     | 378450877   | +         | 2338065-2338184 | hypothetical protein                            | 2284228-2284347      | +               | 120 |    |
| 140285  | STM14_2704     | 378450881   | +         | 2343649-2343762 | hypothetical protein                            | 2286846-2286947      | +               | 165 |    |
| 140285  | STM14_2705     | 378450885   | +         | 2342720-2342848 | hypothetical protein                            | 2288812-2288925      | +               | 114 |    |
| 140285  | STM14_2706     | 378450886   | +         | 2342834-2343067 | hypothetical protein                            | 2288883-2289011      | -               | 120 |    |
| 140285  | STM14_2710     | 378450890   | +         | 2345635-2345787 | hypothetical protein                            | 2289997-2289230      | +               | 234 |    |
| 140285  | STM14_2714     | 378450894   | +         | 2349999-2350304 | hypothetical protein                            | 2291798-2291950      | -               | 153 |    |
| 140285  | STM14_2716     | 378450896   | +         | 2351963-2352097 | hypothetical protein                            | 2296162-2296467      | +               | 306 |    |
| 140285  | STM14_2718     | 378450898   | +         | 2352991-2353110 | hypothetical protein                            | 2298126-2298260      | -               | 135 |    |
| ST474   | STM474_2293    | 379701432   | +         | 2300273-2300395 | hypothetical protein                            | 2299154-2299273      | -               | 120 |    |
| 140285  | STM14_2724     | 378450904   | +         | 2358928-2359059 | hypothetical protein                            | 2300273-2300395      | -               | 123 |    |
| UK1     | STMUK_2237     | 378989594   | +         | 2307167-2307274 | hypothetical protein                            | 2305091-2305222      | +               | 132 |    |
| 140285  | STM14_2725     | 378450905   | +         | 2359144-2359266 | hypothetical protein                            | 2305138-2305245      | -               | 108 |    |
| 140285  | STM14_2726     | 378450906   | +         | 2359149-2359277 | hypothetical protein                            | 2305307-2305429      | +               | 123 |    |
| 140285  | STM14_2730     | 378450910   | +         | 2361472-2361576 | hypothetical protein                            | 2305312-2305440      | -               | 129 |    |
| 140285  | STM14_2736     | 378450915   | +         | 2364975-2365205 | hypothetical protein                            | 2307635-2307739      | -               | 105 |    |
| 140285  | STM14_2738     | 378450917   | +         | 2365897-2366040 | hypothetical protein                            | 2311138-2311368      | -               | 231 |    |
| 140285  | STM14_2750     | 378450929   | +         | 2378246-2378392 | hypothetical protein                            | 2312060-2312203      | +               | 144 |    |
| T000240 | STMDT12_C22520 | 378984793   | +         | 2327280-2327405 | hypothetical protein                            | 2324409-2324555      | -               | 147 |    |
| 140285  | STM14_2764     | 378450942   | +         | 2389094-2389207 | hypothetical protein                            | 2329453-2329578      | -               | 126 |    |
| 140285  | STM14_2774     | 378450952   | +         | 2397715-2397861 | hypothetical protein                            | 2332527-2335370      | -               | 114 |    |
| 140285  | STM14_2791     | 378450969   | +         | 2411310-2411441 | hypothetical protein                            | 2343878-2344024      | +               | 147 |    |
| 140285  | STM14_2798     | 378450976   | +         | 2418131-2418256 | hypothetical protein                            | 2357473-2357604      | +               | 132 |    |
| 140285  | STM14_2803     | 378450980   | +         | 2425164-2425280 | hypothetical protein                            | 2364294-2364419      | -               | 126 |    |
| 140285  | STM14_2805     | 378450982   | +         | 2427980-2428210 | hypothetical protein                            | 2371327-2371443      | -               | 117 |    |
| 140285  | STM14_2806     | 378450983   | +         | 2428153-2428293 | hypothetical protein                            | 2374143-2374373      | +               | 231 |    |
| 140285  | STM14_2811     | 378450988   | +         | 2432657-2432773 | hypothetical protein                            | 2374316-2374456      | +               | 141 |    |
| 140285  | STM14_2822     | 378450999   | +         | 2445948-2446052 | hypothetical protein                            | 2378820-2378936      | +               | 117 |    |
| 140285  | STM14_2823     | 378451000   | +         | 2446155-2446358 | hypothetical protein                            | 2392111-2392215      | +               | 105 |    |
| 140285  | STM14_2834     | 378451011   | +         | 2455277-2455405 | hypothetical protein                            | 2392318-2392521      | +               | 204 |    |
| ST474   | STM474_2412    | 379701547   | -         | 2421293-2421412 | hypothetical protein                            | 2401440-2401568      | +               | 129 |    |
| 140285  | STM14_2854     | 378451030   | +         | 2475407-2475529 | hypothetical protein                            | 2421293-2421412      | -               | 120 |    |
| 140285  | STM14_2855     | 378451031   | +         | 2475538-2475645 | hypothetical protein                            | 2421571-2421693      | -               | 123 |    |
| 140285  | STM14_2856     | 378451032   | +         | 2475654-2475836 | hypothetical protein                            | 2421702-2421809      | +               | 108 |    |
| 140285  | STM14_2870     | 378451046   | +         | 2491031-2491153 | hypothetical protein                            | 2421818-2422000      | +               | 183 |    |
| 140285  | STM14_2871     | 378451047   | +         | 2491241-2491357 | hypothetical protein                            | 2437195-2437317      | +               | 123 |    |
| 140285  | STM14_2880     | 378451056   | +         | 2499179-2499430 | hypothetical protein                            | 2437405-2437521      | -               | 117 |    |
| 140285  | STM14_2881     | 378451057   | +         | 2499320-2499454 | hypothetical protein                            | 2445343-2445594      | -               | 252 |    |
| 140285  | STM14_2890     | 378451066   | +         | 2508681-2508854 | hypothetical protein                            | 2445484-2445618      | +               | 135 |    |
| 140285  | STM14_2902     | 378451078   | +         | 2517875-2518045 | hypothetical protein                            | 2454845-2455018      | +               | 174 |    |
| 140285  | STM14_2911     | 378451087   | +         | 2527947-2528102 | hypothetical protein                            | 2464099-2464209      | +               | 171 |    |
| 140285  | STM14_2921     | 378451097   | +         | 2537322-2537438 | hypothetical protein                            | 2474111-2474282      | +               | 156 |    |
| 140285  | STM14_2940     | 378451116   | +         | 2553683-2553823 | hypothetical protein                            | 2483486-2483602      | +               | 117 |    |
| 140285  | STM14_2941     | 378451117   | +         | 2553820-2553948 | hypothetical protein                            | 2499847-2499987      | -               | 149 |    |
| T000240 | STMDT12_C24200 | 378984961   | +         | 2507125-2507337 | hypothetical protein                            | 2499884-2500112      | -               | 121 |    |
| 140285  | STM14_2952     | 378451127   | +         | 2565752-2565865 | hypothetical protein                            | 2509298-2509510      | +               | 213 |    |
| 140285  | STM14_2955     | 378451130   | +         | 2569137-2569283 | hypothetical protein                            | 2511916-2512029      | -               | 114 |    |
| 140285  | STM14_2959     | 378451134   | +         | 2573587-2573775 | hypothetical protein                            | 2515301-2515447      | -               | 147 |    |
| 140285  | STM14_2986     | 378451155   | +         | 2595762-2595923 | hypothetical protein                            | 2519751-2519939      | +               | 189 |    |
| 140285  | STM14_2987     | 410023203   | +         | 2595873-2595998 | hypothetical protein                            | 2541926-2542087      | +               | 162 |    |
| 140285  | STM14_2988     | 378451157   | +         | 2595966-2596094 | hypothetical protein                            | 2542037-2542162      | -               | 126 |    |
| 140285  | STM14_3032     | 378451201   | +         | 2633812-2634012 | hypothetical protein                            | 2542130-2542258      | +               | 129 |    |
| 140285  | STM14_3036     | 378451205   | +         | 2637342-2637476 | hypothetical protein                            | 2579976-2580176      | +               | 201 |    |
| 140285  | STM14_3043     | 378451212   | +         | 2645096-2645227 | hypothetical protein                            | 2583506-2583640      | -               | 135 |    |
| 140285  | STM14_3056     | 378451225   | +         | 2657883-2658191 | hypothetical protein                            | 2591260-2591391      | -               | 132 |    |
| 140285  | STM14_3063     | 378451232   | +         | 2664349-2664552 | hypothetical protein                            | 2604047-2604355      | -               | 309 |    |
| 140285  | STM14_3069     | 378451238   | +         | 2672447-2672584 | putative cytoplasmic protein                    | 2610513-2610716      | -               | 204 |    |
| 140285  | STM14_3072     | 378451241   | +         | 2673033-2673269 | putative inner membrane protein                 | 2618611-2618748      | -               | 138 |    |
| T000240 | STMDT12_C25240 | 378985065   | +         | 2617191-2617382 | putative cytoplasmic protein                    | 2619197-2619433      | -               | 237 |    |
| 140285  | STM14_3079     | 378451248   | +         | 2685671-2685784 | hypothetical protein                            | 2619483-2619674      | +               | 192 |    |
| 140285  | STM14_3080     | 378451249   | +         | 2685875-2685957 | hypothetical protein                            | 2631835-2631948      | +               | 114 |    |
| 140285  | STM14_3081     | 378451250   | +         | 2685854-2685967 | hypothetical protein                            | 2641839-2642023      | +               | 183 |    |
| ST474   | STM474_2618    | 379701765   | +         | 2646222-2646344 | hypothetical protein                            | 2632018-2632131      | -               | 114 |    |
| 140285  | STM14_3086     | 378451254   | +         | 2702354-2702470 | hypothetical protein                            | 2646222-2646344      | +               | 123 |    |
| 140285  | STM14_3087     | 378451255   | +         | 2702529-2702684 | hypothetical protein                            | 2648518-2648634      | +               | 117 |    |
| 140285  | STM14_3090     | 378451258   | +         | 2704480-2704581 | hypothetical protein                            | 2648693-2648848      | -               | 156 |    |
| 140285  | STM14_3096     | 378451264   | +         | 2710094-2710216 | type IV pilus biogenesis/stability protein PilW | 2650644-2650745      | +               | 102 |    |
| 140285  | STM14_3099     | 378451267   | +         | 2712052-2712147 | hypothetical protein                            | 2656258-2656380      | -               | 123 |    |
| 140285  | STM14_3107     | 378451275   | +         | 2725280-2725504 | hypothetical protein                            | 2658216-2658311      | +               | 96  |    |
| ST474   | STM474_2636    | 379701763   | +         | 2671480-2671593 | hypothetical protein                            | 2671444-2671668      | -               | 225 |    |
| 140285  | STM14_3109     | 378451277   | +         | 2726253-2726387 | hypothetical protein                            | 2671480-2671593      | +               | 114 |    |
| 140285  | STM14_3119     | 378451287   | +         | 2734356-2734475 | hypothetical protein                            | 2672417-2672551      | -               | 135 |    |
| 140285  | STM14_3122     | 378451290   | +         | 2735856-2735978 | hypothetical protein                            | 2680520-2680639      | +               | 120 |    |
| 140285  | STM14_3123     | 378451291   | +         | 2735883-2735993 | hypothetical protein                            | 2682020-2682142      | +               | 123 |    |
| 140285  | STM14_3134     | 378451302   | +         | 2746625-2746771 | hypothetical protein                            | 2682047-2682157      | -               | 111 |    |
| 140285  | STM14_3144     | 378451312   | +         | 2759420-2759548 | hypothetical protein                            | 2692789-2692935      | -               | 147 |    |
| 140285  | STM14_3146     | 378451314   | +         | 2763716-2763949 | hypothetical protein                            | 2705584-2705712      | +               | 129 |    |
| 140285  | STM14_3165     | 378451333   | +         | 2782226-2782354 | hypothetical protein                            | 2709880-2710113      | +               | 234 |    |
| ST474   | STM474_2692    | 379701819   | +         | 2729509-2729628 | integrase, catalytic region                     | 2728390-2728518      | -               | 129 |    |
| D23580  | STMWV_26031    | 378446002   | +         | 2757050-2757262 | putative prophage protein                       | 2729509-2729628      | -               | 120 |    |
|         |                |             |           |                 |                                                 | 2730381-2730593      | -               | 213 |    |

|        |                |           |   |                 |                                                               |                 |   |     |
|--------|----------------|-----------|---|-----------------|---------------------------------------------------------------|-----------------|---|-----|
| 140285 | STM14_1473     | 378449695 | - | 1321447-1322052 | hypothetical protein                                          | 2739236-2739841 | + | 606 |
| 140285 | STM14_1167     | 410023163 | + | 1073250-1073585 | hypothetical protein                                          | 2757552-2757887 | - | 336 |
| 140285 | STM14_3197     | 378451364 | + | 2811771-2811908 | hypothetical protein                                          | 2757924-2758061 | + | 138 |
| 140285 | STM14_3199     | 378451366 | - | 2812905-2813093 | hypothetical protein                                          | 2759058-2759246 | - | 189 |
| 140285 | STM14_3202     | 378451368 | - | 2814160-2814285 | hypothetical protein                                          | 2760313-2760438 | - | 126 |
| 140285 | STM14_3209     | 378451375 | + | 2816906-2817040 | prophage Dini                                                 | 2763059-2763193 | + | 135 |
| 140285 | STM14_1430     | 410023172 | + | 1293547-1293774 | hypothetical protein                                          | 2768125-2768352 | - | 228 |
| 140285 | STM14_1425     | 378449648 | - | 1290945-1291135 | hypothetical protein                                          | 2770784-2770954 | + | 171 |
| 140285 | STM14_3230     | 378451395 | + | 2830688-2831005 | hypothetical protein                                          | 2777447-2777584 | + | 138 |
| 140285 | STM14_3238     | 378451396 | + | 2831002-2831118 | hypothetical protein                                          | 2777581-2777607 | - | 117 |
| 140285 | STM14_3235     | 378451401 | - | 2832834-2833998 | hypothetical protein                                          | 2780413-2780577 | - | 165 |
| 140285 | STM14_3236     | 378451402 | - | 2833998-2834177 | hypothetical protein                                          | 2780577-2780756 | - | 180 |
| 140285 | STM14_3239     | 378451405 | - | 2836525-2836725 | putative methyltransferase                                    | 2783104-2783304 | - | 201 |
| 140285 | STM14_3249     | 378451415 | + | 2846371-2846505 | hypothetical protein                                          | 2792950-2793084 | + | 135 |
| 140285 | STM14_3259     | 378451420 | + | 2855709-2855837 | hypothetical protein                                          | 2802205-2802333 | + | 129 |
| 140285 | STM14_3260     | 378451421 | + | 2855915-2856031 | hypothetical protein                                          | 2802411-2802527 | + | 117 |
| 140285 | STM14_3267     | 378451427 | + | 2861933-2862097 | hypothetical protein                                          | 2808429-2808593 | + | 165 |
| 140285 | STM14_3272     | 378451432 | + | 2866577-2866735 | hypothetical protein                                          | 2813073-2813231 | + | 159 |
| 140285 | STM14_3273     | 378451433 | - | 2866637-2866750 | hypothetical protein                                          | 2813133-2813246 | - | 114 |
| 140285 | STM14_3280     | 378451440 | - | 2870862-2871008 | hypothetical protein                                          | 2828133-2828279 | - | 147 |
| 140285 | STM14_3282     | 378451442 | + | 2872506-2872700 | putative cytochrome c-type biogenesis protein (heme exporter) | 2829777-2829971 | + | 195 |
| UK1    | STMUK_2717     | 378990059 | - | 2824344-2824538 | putative cytoplasmic protein                                  | 2833362-2833556 | - | 195 |
| 140285 | STM14_3291     | 378451450 | - | 2879362-2879469 | hypothetical protein                                          | 2836633-2836740 | - | 108 |
| 140285 | STM14_3295     | 378451454 | + | 2881056-2881160 | hypothetical protein                                          | 2838327-2838431 | + | 105 |
| 140285 | STM14_3296     | 378451455 | - | 2881388-2881540 | hypothetical protein                                          | 2838659-2838811 | - | 153 |
| ST474  | STM474_2816    | 379701937 | + | 2855546-2855689 | hypothetical protein                                          | 2855546-2855689 | + | 144 |
| ST474  | STM474_2853    | 379701973 | + | 2881219-2881347 | hypothetical protein                                          | 2881219-2881347 | + | 129 |
| ST474  | STM474_2856    | 379701976 | + | 2884712-2884939 | hypothetical protein                                          | 2884712-2884939 | + | 228 |
| ST474  | STM474_2868    | 379701988 | + | 2885673-2885810 | hypothetical protein                                          | 2885673-2885810 | + | 180 |
| ST474  | STM474_2868    | 379701988 | + | 2895927-2896202 | hypothetical protein                                          | 2885927-2886202 | + | 276 |
| ST474  | STM474_2869    | 379701989 | + | 2896539-2896805 | phage DNA binding protein                                     | 2896539-2896805 | + | 267 |
| 140285 | STM14_3309     | 378451467 | + | 2905915-2906040 | hypothetical protein                                          | 2908255-2908380 | + | 126 |
| 140285 | STM14_3324     | 378451481 | - | 2917172-2917867 | hypothetical protein                                          | 2920053-2920208 | - | 156 |
| 140285 | STM14_3326     | 378451483 | - | 2919626-2919739 | hypothetical protein                                          | 2921967-2922080 | - | 114 |
| ST474  | STM474_2898    | 379702018 | - | 2927700-2927858 | hypothetical protein                                          | 2927700-2927858 | - | 159 |
| 000240 | STMDT12_C28220 | 378985362 | - | 2935935-2936111 | hypothetical protein                                          | 2934945-2935121 | - | 177 |
| 140285 | STM14_3340     | 378451496 | + | 2935806-2935976 | hypothetical protein                                          | 2938147-2938317 | + | 171 |
| 140285 | STM14_3341     | 378451497 | - | 2936002-2936229 | hypothetical protein                                          | 2938343-2938570 | - | 228 |
| 140285 | STM14_3342     | 378451498 | - | 2936297-2936449 | hypothetical protein                                          | 2938638-2938790 | - | 153 |
| 140285 | STM14_3343     | 378451499 | + | 2936325-2936507 | hypothetical protein                                          | 2938666-2938848 | + | 183 |
| D23580 | STMMW_27451    | 378446140 | - | 2919280-2919612 | putative inner membrane protein                               | 2948871-2949203 | - | 333 |
| 140285 | STM14_3351     | 378451506 | + | 2948161-2948499 | hypothetical protein                                          | 2950502-2950840 | + | 339 |
| 140285 | STM14_3353     | 378451508 | + | 2949636-2949833 | hypothetical protein                                          | 2951977-2952174 | + | 198 |
| 140285 | STM14_3355     | 378451510 | - | 2950805-2950957 | hypothetical protein                                          | 2953146-2953288 | - | 153 |
| 140285 | STM14_3356     | 378451511 | + | 2951059-2951226 | hypothetical protein                                          | 2953400-2953567 | + | 168 |
| 140285 | STM14_3357     | 378451512 | + | 2951242-2951355 | hypothetical protein                                          | 2953583-2953696 | + | 114 |
| 140285 | STM14_3364     | 378451519 | + | 2957937-2958050 | hypothetical protein                                          | 2960278-2960391 | + | 114 |
| 140285 | STM14_3372     | 378451527 | + | 2965822-2965938 | hypothetical protein                                          | 2968163-2968279 | + | 117 |
| 140285 | STM14_3376     | 378451531 | + | 2967191-2967370 | hypothetical protein                                          | 2969532-2969911 | + | 180 |
| 140285 | STM14_3378     | 378451533 | + | 2968220-2968345 | hypothetical protein                                          | 2970561-2970686 | + | 126 |
| 140285 | STM14_3379     | 378451534 | + | 2968355-2968534 | hypothetical protein                                          | 2970696-2970875 | + | 180 |
| 140285 | STM14_3382     | 378451537 | + | 2969378-2969494 | hypothetical protein                                          | 2971719-2971835 | + | 117 |
| 140285 | STM14_3394     | 378451549 | + | 2979522-2979632 | hypothetical protein                                          | 2981863-2981973 | + | 111 |
| 140285 | STM14_3396     | 378451551 | - | 2981060-2981167 | hypothetical protein                                          | 2983401-2983508 | - | 108 |
| 140285 | STM14_3398     | 378451553 | - | 2981900-2982022 | hypothetical protein                                          | 2984241-2984363 | - | 123 |
| 140285 | STM14_3411     | 378451561 | + | 2991063-2991173 | hypothetical protein                                          | 2993404-2993514 | + | 111 |
| 140285 | STM14_3414     | 378451564 | + | 2994186-2994350 | hypothetical protein                                          | 2996527-2996691 | + | 165 |
| 140285 | STM14_3415     | 378451565 | - | 2994269-2994475 | hypothetical protein                                          | 2996610-2996816 | - | 207 |
| 140285 | STM14_3419     | 378451569 | + | 2996927-2997172 | hypothetical protein                                          | 2999268-2999513 | + | 246 |
| 140285 | STM14_3421     | 378451571 | + | 2998326-2998466 | hypothetical protein                                          | 3000667-3000807 | + | 141 |
| 140285 | STM14_3427     | 378451577 | - | 3001727-3001867 | hypothetical protein                                          | 3004068-3004208 | - | 141 |
| 140285 | STM14_3433     | 378451583 | - | 3007751-3007963 | hydrogenase maturation protein                                | 3010092-3010304 | - | 213 |
| 140285 | STM14_3435     | 378451585 | - | 3010214-3010348 | hypothetical protein                                          | 3012555-3012689 | - | 135 |
| 140285 | STM14_3437     | 378451587 | - | 3010872-3011006 | hypothetical protein                                          | 3013213-3013347 | - | 135 |
| 140285 | STM14_3447     | 378451597 | - | 3019238-3019342 | hypothetical protein                                          | 3021579-3021683 | - | 105 |
| 140285 | STM14_3449     | 378451599 | + | 3019869-3020072 | hypothetical protein                                          | 3022210-3022413 | + | 204 |
| 140285 | STM14_3457     | 378451607 | + | 3026426-3026551 | hypothetical protein                                          | 3028767-3028892 | + | 126 |
| 140285 | STM14_3464     | 378451614 | + | 3032112-3032319 | hypothetical protein                                          | 3035514-3035938 | + | 108 |
| 140285 | STM14_3466     | 378451616 | + | 3033296-3033403 | hypothetical protein                                          | 3035535-3035742 | + | 261 |
| 140285 | STM14_3479     | 378451629 | + | 3044345-3044605 | putative cytoplasmic protein                                  | 3046684-3046944 | + | 261 |
| 140285 | STM14_3502     | 378451652 | + | 3066393-3066497 | hypothetical protein                                          | 3068732-3068836 | + | 105 |
| 140285 | STM14_3504     | 378451654 | + | 3067340-3067483 | hypothetical protein                                          | 3069679-3069822 | + | 144 |
| 140285 | STM14_3508     | 378451657 | + | 3068687-3068806 | hypothetical protein                                          | 3071026-3071145 | + | 120 |
| 140285 | STM14_3528     | 378451677 | + | 3087981-3088118 | hypothetical protein                                          | 3090305-3090442 | + | 138 |
| 140285 | STM14_3535     | 378451684 | - | 3092010-3092120 | hypothetical protein                                          | 3094334-3094444 | - | 111 |
| ST474  | STM474_3077    | 379702190 | + | 3100048-3100164 | hypothetical protein                                          | 3100048-3100164 | + | 117 |
| 140285 | STM14_3549     | 378451698 | - | 3106978-3107112 | hypothetical protein                                          | 3108814-3108948 | - | 135 |
| ST474  | STM474_3093    | 379702206 | + | 3116333-3116446 | hypothetical protein                                          | 3116333-3116446 | + | 114 |
| 000240 | STMDT12_C30020 | 378985542 | + | 3118836-3119024 | hypothetical protein                                          | 3117419-3117607 | + | 189 |
| ST474  | STM474_3094    | 379702207 | + | 3117516-3117629 | hypothetical protein                                          | 3117516-3117629 | + | 114 |
| 140285 | STM14_3560     | 378451709 | + | 3121321-3121458 | hypothetical protein                                          | 3122974-3123111 | + | 138 |
| 140285 | STM14_3571     | 378451720 | + | 3134509-3134736 | hypothetical protein                                          | 3136162-3136389 | + | 228 |
| 140285 | STM14_3579     | 378451727 | + | 3140022-3140165 | hypothetical protein                                          | 3141675-3141818 | + | 144 |
| 140285 | STM14_3580     | 378451728 | + | 3140255-3140359 | hypothetical protein                                          | 3141908-3142012 | + | 105 |
| 140285 | STM14_3583     | 378451731 | + | 3143293-3143478 | hypothetical protein                                          | 3144946-3145131 | + | 186 |
| 140285 | STM14_3585     | 378451733 | + | 3144205-3144342 | L-1,2-propanediol oxidoreductase                              | 3145858-3145995 | + | 138 |
| 140285 | STM14_3588     | 378451736 | + | 3146280-3146447 | hypothetical protein                                          | 3147933-3148100 | + | 168 |
| 140285 | STM14_3600     | 378451747 | + | 3152163-3152585 | hypothetical protein                                          | 3154916-3155338 | + | 123 |
| 140285 | STM14_3616     | 378451761 | + | 3177651-3177833 | hypothetical protein                                          | 3179304-3179486 | + | 183 |
| 140285 | STM14_3619     | 378451764 | + | 3179499-3179657 | hypothetical protein                                          | 3181152-3181310 | + | 159 |
| 140285 | STM14_3622     | 378451767 | + | 3182548-3182661 | hypothetical protein                                          | 3184201-3184314 | + | 114 |
| 140285 | STM14_3623     | 378451768 | + | 3182641-3182757 | hypothetical protein                                          | 3184294-3184410 | + | 117 |
| 140285 | STM14_3624     | 378451769 | + | 3182858-3183004 | hypothetical protein                                          | 3184511-3184657 | + | 147 |
| 140285 | STM14_3625     | 378451770 | + | 3183029-3183154 | hypothetical protein                                          | 3184682-3184807 | + | 126 |
| 140285 | STM14_3626     | 378451771 | + | 3183053-3183160 | hypothetical protein                                          | 3184706-3184813 | + | 108 |
| 140285 | STM14_3628     | 378451773 | + | 3183985-3184095 | hypothetical protein                                          | 3185638-3185748 | + | 111 |
| 140285 | STM14_3631     | 378451776 | + | 3185172-3185342 | hypothetical protein                                          | 3186825-3186995 | + | 171 |
| D23580 | STMMW_29721    | 378446366 | - | 3162322-3162468 | hypothetical protein                                          | 3191774-3191920 | - | 147 |
| 140285 | STM14_3635     | 378451780 | + | 3190309-3190434 | hypothetical protein                                          | 3191962-3192087 | + | 126 |
| 140285 | STM14_3642     | 378451787 | + | 3197131-3197247 | hypothetical protein                                          | 3198784-3198900 | + | 117 |
| 140285 | STM14_3645     | 378451790 | + | 3199028-3199198 | hypothetical protein                                          | 3200681-3200851 | + | 171 |
| 140285 | STM14_3649     | 378451794 | + | 3202193-3202315 | hypothetical protein                                          | 3203846-3203968 | + | 123 |
| 140285 | STM14_3658     | 378451803 | + | 3210549-3210968 | hypothetical protein                                          | 3212130-3212549 | + | 420 |
| 140285 | STM14_3662     | 378451807 | + | 3213534-3213719 | hypothetical protein                                          | 3215115-3215300 | + | 186 |
| 140285 | STM14_3666     | 378451810 | + | 3215425-3215670 | hypothetical protein                                          | 3217006-3217251 | + | 246 |
| 000240 | STMDT12_C30880 | 378985628 | + | 3219618-3219734 | hypothetical protein                                          | 3217075-3217191 | + | 117 |
| 140285 | STM14_3670     | 378451813 | + | 3217519-3217686 | hypothetical protein                                          | 3219100-3219267 | + | 168 |

|         |                |           |   |                 |                                  |                 |   |     |
|---------|----------------|-----------|---|-----------------|----------------------------------|-----------------|---|-----|
| 140285  | STM14_3680     | 378451823 | + | 3225806-3226042 | hypothetical protein             | 3227387-3227623 | + | 237 |
| 140285  | STM14_3686     | 378451829 | - | 3230904-3231050 | immunoglobulin VH domain protein | 3232485-3232631 | - | 147 |
| 140285  | STM14_3690     | 378451833 | + | 3235813-3235968 | hypothetical protein             | 3237394-3237549 | + | 156 |
| 140285  | STM14_3691     | 378451834 | + | 3236175-3236279 | hypothetical protein             | 3237756-3237860 | + | 105 |
| 140285  | STM14_3693     | 378451836 | + | 3237457-3237624 | hypothetical protein             | 3239038-3239205 | + | 168 |
| 140285  | STM14_3700     | 378451843 | + | 3243685-3243795 | hypothetical protein             | 3245266-3245376 | + | 111 |
| 140285  | STM14_3702     | 378451845 | + | 3244595-3244732 | hypothetical protein             | 3246176-3246313 | + | 138 |
| 140285  | STM14_3704     | 378451847 | + | 3245634-3245885 | hypothetical protein             | 3247215-3247466 | + | 252 |
| 140285  | STM14_3711     | 378451854 | + | 3251233-3252433 | hypothetical protein             | 3253814-3254014 | + | 201 |
| 140285  | STM14_3718     | 378451863 | + | 3257540-3257698 | hypothetical protein             | 3259921-3259979 | + | 159 |
| 140285  | STM14_3722     | 378451865 | + | 3260720-3260824 | hypothetical protein             | 3262301-3262405 | + | 105 |
| ST474   | STM474_3231    | 379702341 | + | 3267369-3267485 | putative racemase                | 3267369-3267485 | + | 117 |
| UK1     | STMUK_3076     | 378990408 | + | 3217903-3218067 | putative cytoplasmic protein     | 3271879-3272043 | + | 165 |
| 140285  | STM14_3734     | 378451876 | + | 3271996-3272121 | hypothetical protein             | 3273577-3273702 | - | 126 |
| 140285  | STM14_3751     | 378451893 | + | 3285668-3285820 | hypothetical protein             | 3287249-3287401 | - | 153 |
| 140285  | STM14_3757     | 378451899 | + | 3289138-3289263 | hypothetical protein             | 3290719-3290844 | - | 126 |
| 140285  | STM14_3759     | 378451901 | + | 3290425-3290550 | hypothetical protein             | 3292006-3292131 | - | 126 |
| 140285  | STM14_3762     | 378451903 | + | 3293235-3293459 | hypothetical protein             | 3295685-3295909 | - | 225 |
| 140285  | STM14_3763     | 378451904 | + | 3293413-3293547 | hypothetical protein             | 3295863-3295997 | + | 135 |
| 140285  | STM14_3773     | 378451913 | + | 3301831-3301965 | hypothetical protein             | 3304281-3304415 | - | 135 |
| 140285  | STM14_3774     | 378451914 | + | 3302110-3302214 | hypothetical protein             | 3304560-3304664 | + | 105 |
| 140285  | STM14_3778     | 378451918 | + | 3305157-3305300 | hypothetical protein             | 3307607-3307750 | - | 144 |
| 140285  | STM14_3779     | 378451919 | + | 3305240-3305395 | putative cytoplasmic protein     | 3307690-3307845 | - | 156 |
| 140285  | STM14_3783     | 378451923 | + | 3308724-3308864 | hypothetical protein             | 3311174-3311314 | + | 141 |
| T000240 | STMdT12_C31860 | 378985276 | + | 3314720-3314875 | hypothetical protein             | 3312159-3312314 | + | 156 |
| 140285  | STM14_3786     | 378451926 | + | 3310018-3310173 | hypothetical protein             | 3312468-3312623 | + | 156 |
| 140285  | STM14_3789     | 378451928 | + | 3312290-3312427 | hypothetical protein             | 3314742-3314879 | + | 138 |
| 140285  | STM14_3790     | 378451929 | + | 3312496-3312606 | hypothetical protein             | 3314948-3315058 | - | 111 |
| 140285  | STM14_3791     | 378451931 | + | 3314050-3314181 | hypothetical protein             | 3316502-3316633 | + | 182 |
| 140285  | STM14_3793     | 378451932 | + | 3314188-3314334 | hypothetical protein             | 3316640-3316786 | + | 147 |
| 140285  | STM14_3794     | 378451933 | + | 3314216-3314410 | hypothetical protein             | 3316668-3316862 | + | 192 |
| 140285  | STM14_3798     | 378451937 | + | 3318584-3318703 | hypothetical protein             | 3321036-3321155 | + | 120 |
| 140285  | STM14_3800     | 378451939 | + | 3319990-3320106 | hypothetical protein             | 3322442-3322558 | - | 117 |
| 140285  | STM14_3801     | 378451940 | + | 3320290-3320487 | hypothetical protein             | 3322742-3322939 | + | 198 |
| 140285  | STM14_3803     | 378451942 | + | 3322464-3322571 | hypothetical protein             | 3324916-3325023 | - | 108 |
| ST474   | STM474_3301    | 379702409 | + | 3334473-3334658 | hypothetical protein             | 3334473-3334658 | - | 186 |
| 140285  | STM14_3815     | 378451954 | + | 3332051-3332179 | hypothetical protein             | 3334503-3334631 | + | 129 |
| 140285  | STM14_0363     | 378448623 | + | 352120-352227   | hypothetical protein             | 3337626-3337733 | + | 108 |
| 140285  | STM14_3830     | 378451969 | + | 3342234-3342434 | hypothetical protein             | 3344686-3344886 | + | 201 |
| 140285  | STM14_3833     | 378451972 | + | 3344492-3344629 | hypothetical protein             | 3346944-3347081 | - | 138 |
| 140285  | STM14_3834     | 378451973 | + | 3344530-3344640 | hypothetical protein             | 3346982-3347092 | + | 111 |
| ST474   | STM474_3318    | 379702426 | + | 3348584-3348700 | hypothetical protein             | 3348584-3348700 | - | 117 |
| 140285  | STM14_3837     | 378451976 | + | 3346625-3346789 | hypothetical protein             | 3349077-3349241 | + | 165 |
| 140285  | STM14_3838     | 378451977 | + | 3346793-3346924 | hypothetical protein             | 3349245-3349376 | - | 132 |
| 140285  | STM14_3840     | 378451979 | + | 3349441-3349545 | hypothetical protein             | 3351893-3351997 | - | 105 |
| 140285  | STM14_3851     | 378451990 | + | 3361049-3361165 | hypothetical protein             | 3363501-3363617 | + | 117 |
| ST474   | STM474_3334    | 379702442 | + | 3364546-3364662 | hypothetical protein             | 3364546-3364662 | + | 117 |
| 140285  | STM14_3860     | 378451999 | + | 3368299-3368398 | hypothetical protein             | 3370743-3370850 | + | 108 |
| 140285  | STM14_3865     | 378452004 | + | 3371178-3372354 | hypothetical protein             | 3374630-3374806 | - | 177 |
| T000240 | STMdT12_C2520  | 378985792 | + | 3381047-3381148 | hypothetical protein             | 3378488-3378589 | + | 102 |
| 140285  | STM14_3872     | 378452011 | + | 3377873-3378022 | hypothetical protein             | 3380325-3380474 | - | 150 |
| 140285  | STM14_3875     | 378452014 | + | 3380454-3380651 | hypothetical protein             | 3382906-3383103 | + | 198 |
| 140285  | STM14_3884     | 378452023 | + | 3390891-3391163 | hypothetical protein             | 3393343-3393615 | + | 273 |
| 140285  | STM14_3895     | 378452033 | + | 3402540-3402695 | hypothetical protein             | 3404992-3405147 | + | 156 |
| 140285  | STM14_3901     | 378452039 | + | 3408358-3408459 | hypothetical protein             | 3410810-3410911 | - | 102 |
| 140285  | STM14_3904     | 378452042 | + | 3410298-3410435 | hypothetical protein             | 3412750-3412887 | + | 138 |
| 140285  | STM14_3907     | 378452045 | + | 3412994-3413194 | hypothetical protein             | 3415446-3415646 | + | 201 |
| 140285  | ymqD           | 378452049 | + | 3415051-3415356 | putative inner membrane protein  | 3417503-3417808 | + | 306 |
| ST474   | STM474_3403    | 379702507 | + | 3435178-3435297 | hypothetical protein             | 3435178-3435297 | + | 120 |
| D23580  | STMWV_32461    | 378446633 | + | 3437229-3437615 | hypothetical protein             | 3435510-3435896 | + | 387 |
| 140285  | STM14_3932     | 378452069 | + | 3436508-3436648 | hypothetical protein             | 3438960-3439100 | - | 141 |
| 140285  | STM14_3933     | 378452070 | + | 3436575-3436694 | hypothetical protein             | 3439027-3439146 | + | 120 |
| 140285  | STM14_3934     | 378452071 | + | 3436648-3436776 | hypothetical protein             | 3439100-3439228 | + | 129 |
| 140285  | STM14_3938     | 378452075 | + | 3440518-3440661 | hypothetical protein             | 3442970-3443113 | + | 144 |
| 140285  | yhbT           | 378452090 | + | 3452716-3453240 | putative lipid carrier protein   | 3460237-3460761 | - | 525 |
| 140285  | STM14_3965     | 378452100 | + | 3446611-3446718 | hypothetical protein             | 3472132-3472239 | + | 108 |
| 140285  | STM14_3985     | 378452118 | + | 3482355-3482456 | hypothetical protein             | 3489876-3489977 | - | 102 |
| 140285  | STM14_3987     | 378452120 | + | 3483883-3484117 | hypothetical protein             | 3493698-3493850 | + | 135 |
| 140285  | STM14_3996     | 378452128 | + | 3490436-3490546 | hypothetical protein             | 3497957-3498063 | + | 111 |
| 140285  | STM14_4018     | 378452150 | + | 3508092-3508241 | hypothetical protein             | 3515613-3515762 | + | 150 |
| 140285  | STM14_4019     | 378452151 | + | 3508281-3508475 | hypothetical protein             | 3515802-3515996 | - | 195 |
| 140285  | STM14_4023     | 378452155 | + | 3515633-3515794 | hypothetical protein             | 3523154-3523315 | + | 162 |
| 140285  | STM14_4034     | 378452166 | + | 3525086-3525205 | hypothetical protein             | 3532607-3532726 | + | 120 |
| 140285  | STM14_4051     | 378452183 | + | 3540466-3540597 | malate dehydrogenase             | 3547987-3548118 | - | 132 |
| 140285  | STM14_4053     | 378452185 | + | 3541795-3541923 | hypothetical protein             | 3549316-3549444 | + | 129 |
| T000240 | STMdT12_C34190 | 378985959 | + | 3551875-3551970 | hypothetical protein             | 3550031-3550126 | + | 96  |
| ST474   | STM474_3527    | 379702628 | + | 3554690-3554815 | hypothetical protein             | 3554690-3554815 | - | 126 |
| 140285  | STM14_4069     | 378452201 | + | 3558566-3558757 | hypothetical protein             | 3566087-3566278 | + | 192 |
| 140285  | STM14_4074     | 378452206 | + | 3563669-3563851 | hypothetical protein             | 3571190-3571372 | - | 183 |
| 140285  | STM14_4075     | 378452207 | + | 3563867-3563971 | hypothetical protein             | 3571388-3571492 | + | 105 |
| 140285  | STM14_4081     | 378452213 | + | 3568595-3568738 | hypothetical protein             | 3576116-3576259 | - | 144 |
| 140285  | STM14_4088     | 378452220 | + | 3574592-3574753 | hypothetical protein             | 3582113-3582274 | - | 162 |
| 140285  | STM14_4089     | 378452221 | + | 3574662-3574820 | hypothetical protein             | 3582183-3582341 | + | 159 |
| 140285  | STM14_4093     | 378452225 | + | 3579746-3579922 | hypothetical protein             | 3587267-3587443 | + | 177 |
| 140285  | STM14_4094     | 378452226 | + | 3580182-3580316 | hypothetical protein             | 3587703-3587837 | - | 135 |
| 140285  | STM14_4095     | 378452227 | + | 3580370-3580480 | hypothetical protein             | 3587891-3588001 | + | 111 |
| T000240 | STMdT12_C34250 | 378985992 | + | 3595480-3595632 | hypothetical protein             | 3593698-3593850 | + | 153 |
| 140285  | STM14_4215     | 378452273 | + | 3611988-3612179 | elongation factor Tu             | 3619612-3619803 | + | 192 |
| ST474   | STM474_3611    | 379702705 | + | 3620933-3621070 | hypothetical protein             | 3620933-3621070 | - | 138 |
| 140285  | STM14_4163     | 378452290 | + | 3623551-3623655 | hypothetical protein             | 3631175-3631279 | + | 105 |
| 140285  | STM14_4167     | 378452293 | + | 3623655-3623680 | hypothetical protein             | 3633979-3634104 | + | 126 |
| 140285  | STM14_4172     | 378452298 | + | 3629162-3629344 | hypothetical protein             | 3636786-3636968 | + | 183 |
| 140285  | STM14_4180     | 378452306 | + | 3635785-3635937 | hypothetical protein             | 3643409-3643561 | + | 153 |
| 140285  | STM14_4182     | 378452308 | + | 3637245-3637421 | hypothetical protein             | 3644869-3645045 | - | 177 |
| 140285  | STM14_4185     | 378452311 | + | 3640241-3640396 | hypothetical protein             | 3647865-3648020 | - | 156 |
| 140285  | STM14_4192     | 378452318 | + | 3649991-3650131 | hypothetical protein             | 3657615-3657755 | - | 141 |
| 140285  | STM14_4207     | 378452333 | + | 3663870-3663983 | hypothetical protein             | 3671494-3671607 | - | 114 |
| 140285  | STM14_4213     | 378452339 | + | 3670273-3670407 | hypothetical protein             | 3677897-3678031 | - | 135 |
| 140285  | STM14_4214     | 378452340 | + | 3670242-3670449 | hypothetical protein             | 3677966-3678073 | + | 108 |
| 140285  | STM14_4220     | 378452346 | + | 3677538-3677768 | hypothetical protein             | 3685162-3685392 | + | 231 |
| 140285  | STM14_4224     | 378452350 | + | 3680653-3680766 | hypothetical protein             | 3688277-3688990 | + | 114 |
| 140285  | STM14_4229     | 378452355 | + | 3684140-3684289 | hypothetical protein             | 3691764-3691913 | - | 150 |
| 140285  | STM14_4233     | 378452359 | + | 3690393-3690500 | hypothetical protein             | 3698017-3698214 | - | 108 |
| 140285  | STM14_4240     | 378452366 | + | 3698369-3698491 | hypothetical protein             | 3705993-3706115 | + | 123 |
| 140285  | STM14_4243     | 378452369 | + | 3700901-3701017 | hypothetical protein             | 3708524-3708640 | - | 117 |
| 140285  | STM14_4259     | 378452384 | + | 3722125-3722298 | hypothetical protein             | 3729748-3729921 | - | 174 |
| 140285  | STM14_4261     | 378452386 | + | 3723463-3723627 | hypothetical protein             | 3731086-3731250 | + | 165 |

|         |              |           |   |                 |                                      |                 |   |     |
|---------|--------------|-----------|---|-----------------|--------------------------------------|-----------------|---|-----|
| 14028S  | STM14_4263   | 378452387 | + | 3723698-3723940 | putative inner membrane protein      | 3731321-3731563 | + | 243 |
| 14028S  | STM14_4269   | 378452393 | + | 3728906-3729031 | hypothetical protein                 | 3736529-3736654 | + | 126 |
| 14028S  | STM14_4270   | 378452394 | + | 3729191-3729319 | hypothetical protein                 | 3736814-3736942 | + | 129 |
| ST474   | STM474_3713  | 379702806 | - | 3737509-3737628 | hypothetical protein                 | 3737508-3737627 | - | 120 |
| 14028S  | STM14_4277   | 378452401 | + | 3735927-3736031 | hypothetical protein                 | 3743551-3743655 | + | 105 |
| 14028S  | STM14_4291   | 378452415 | + | 3747318-3747434 | hypothetical protein                 | 3754942-3755058 | + | 117 |
| 14028S  | STM14_4293   | 378452417 | + | 3747983-3748117 | putative cytoplasmic protein         | 3755607-3755741 | + | 135 |
| 14028S  | STM14_4296   | 378452420 | + | 3750462-3750605 | hypothetical protein                 | 3758086-3758229 | + | 144 |
| 14028S  | STM14_4316   | 378452440 | + | 3770533-3770684 | hypothetical protein                 | 3778117-3778308 | + | 132 |
| 14028S  | STM14_4325   | 378452449 | + | 3781138-3781305 | hypothetical protein                 | 3788762-3788929 | + | 168 |
| 14028S  | STM14_4333   | 378452457 | + | 3789092-3789217 | hypothetical protein                 | 3796716-3796841 | + | 126 |
| 14028S  | STM14_4336   | 378452460 | + | 3792675-3792815 | hypothetical protein                 | 3800299-3800439 | + | 141 |
| 14028S  | STM14_4339   | 378452463 | + | 3794036-3794179 | hypothetical protein                 | 3801660-3801803 | + | 144 |
| 14028S  | STM14_4340   | 378452464 | + | 3794140-3794265 | hypothetical protein                 | 3801764-3801889 | + | 126 |
| 14028S  | STM14_4343   | 378452467 | + | 3796527-3796667 | hypothetical protein                 | 3804151-3804291 | + | 141 |
| 14028S  | STM14_4347   | 378452471 | + | 3801111-3801227 | hypothetical protein                 | 3808735-3808851 | + | 117 |
| 14028S  | STM14_4350   | 378452474 | + | 3803739-3803876 | hypothetical protein                 | 3811363-3811500 | + | 138 |
| 14028S  | STM14_4352   | 378452476 | + | 3805315-3805461 | hypothetical protein                 | 3812939-3813085 | + | 147 |
| 14028S  | STM14_4354   | 378452478 | + | 3807400-3807591 | hypothetical protein                 | 3815024-3815215 | + | 192 |
| 14028S  | STM14_4361   | 378452485 | + | 3818231-3818344 | hypothetical protein                 | 3825855-3825968 | + | 114 |
| ST474   | ldrd         | 379702886 | - | 3829507-3829632 | Small toxic polypeptide ldrD         | 3829506-3829631 | - | 126 |
| 14028S  | STM14_4366   | 378452489 | - | 3822083-3822277 | hypothetical protein                 | 3829707-3829901 | - | 195 |
| 14028S  | STM14_4374   | 378452497 | - | 3827982-3828201 | hypothetical protein                 | 3835606-3835725 | - | 120 |
| 14028S  | STM14_4378   | 378452501 | - | 3832781-3832954 | hypothetical protein                 | 3840405-3840578 | - | 174 |
| 14028S  | STM14_4379   | 378452502 | + | 3832815-3832976 | hypothetical protein                 | 3840439-3840600 | + | 162 |
| 14028S  | STM14_4388   | 378452509 | + | 3842019-3842180 | hypothetical protein                 | 3849643-3849804 | + | 162 |
| 14028S  | STM14_4393   | 378452514 | + | 3846344-3846445 | hypothetical protein                 | 3853968-3854069 | + | 102 |
| 14028S  | STM14_4395   | 378452516 | + | 3847245-3847379 | hypothetical protein                 | 3854869-3855003 | + | 135 |
| 14028S  | STM14_4400   | 378452524 | + | 3852193-3852324 | hypothetical protein                 | 3859817-3859953 | + | 132 |
| 14028S  | STM14_4408   | 378452530 | + | 3856473-3856610 | hypothetical protein                 | 3864097-3864234 | + | 138 |
| 14028S  | STM14_4410   | 378452530 | + | 3856798-3857019 | hypothetical protein                 | 3864422-3864643 | + | 222 |
| 14028S  | STM14_4415   | 378452535 | + | 3861460-3861693 | hypothetical protein                 | 3869084-3869317 | + | 234 |
| 14028S  | STM14_4416   | 378452536 | + | 3861562-3861738 | hypothetical protein                 | 3869186-3869362 | + | 177 |
| 14028S  | STM14_4419   | 378452539 | + | 3863890-3864222 | hypothetical protein                 | 3871514-3871846 | + | 333 |
| 14028S  | STM14_4424   | 378452544 | + | 3869165-3869311 | hypothetical protein                 | 3876789-3876935 | + | 147 |
| 14028S  | STM14_4437   | 378452557 | + | 3881551-3881694 | hypothetical protein                 | 3889175-3889318 | + | 144 |
| 14028S  | STM14_4448   | 378452568 | + | 3893735-3893932 | hypothetical protein                 | 3901359-3901556 | + | 198 |
| ST474   | STM474_3868  | 379702957 | - | 3911348-3911467 | hypothetical protein                 | 3911347-3911466 | - | 120 |
| 14028S  | STM14_4456   | 378452576 | + | 3904878-3905129 | hypothetical protein                 | 3912501-3912752 | + | 252 |
| 14028S  | STM14_4485   | 378452605 | - | 3932731-3932850 | hypothetical protein                 | 3940353-3940472 | - | 120 |
| 14028S  | STM14_4497   | 378452617 | + | 3941019-3941198 | hypothetical protein                 | 3948641-3948820 | + | 180 |
| 14028S  | STM14_4501   | 378452621 | + | 3943928-3944110 | hypothetical protein                 | 3951550-3951732 | + | 183 |
| 14028S  | STM14_4504   | 378452624 | + | 3946552-3946725 | hypothetical protein                 | 3954174-3954347 | + | 174 |
| 14028S  | STM14_4512   | 378452632 | + | 3954806-3954916 | hypothetical protein                 | 3962428-3962538 | + | 111 |
| 14028S  | STM14_4518   | 378452637 | + | 3962472-3962597 | hypothetical protein                 | 3970094-3970219 | + | 126 |
| 14028S  | STM14_4520   | 378452639 | + | 3963213-3963356 | hypothetical protein                 | 3970835-3970978 | + | 144 |
| 14028S  | STM14_4521   | 378452640 | + | 3963387-3963497 | hypothetical protein                 | 3971009-3971119 | + | 111 |
| D23580  | STM14_37441  | 378447121 | - | 3975758-3975931 | ISaC3 transposase                    | 3974196-3974369 | - | 174 |
| D23580  | STM14_37491  | 378447125 | - | 3981984-3982097 | putative product                     | 3980422-3980535 | - | 114 |
| 14028S  | STM14_4531   | 378452648 | + | 3973251-3973476 | hypothetical protein                 | 3980973-3981098 | + | 126 |
| 14028S  | STM14_3040   | 378451209 | + | 2640806-2640913 | hypothetical protein                 | 2981874-2981981 | + | 108 |
| 14028S  | STM14_4535   | 378452652 | + | 3974935-3975075 | hypothetical protein                 | 3982557-3982697 | + | 141 |
| T000240 | STM14_C38190 | 378986359 | - | 3984324-3984416 | hypothetical protein                 | 3982742-3982834 | - | 93  |
| 14028S  | STM14_4537   | 378452654 | + | 3978059-3978172 | hypothetical protein                 | 3985681-3985794 | + | 114 |
| 14028S  | STM14_4539   | 378452656 | + | 3979055-3979171 | hypothetical protein                 | 3986677-3986793 | + | 117 |
| 14028S  | STM14_4540   | 378452657 | + | 3979172-3979297 | hypothetical protein                 | 3986794-3986919 | + | 126 |
| 14028S  | STM14_4549   | 378452666 | + | 3986024-3986146 | hypothetical protein                 | 3993646-3993768 | + | 123 |
| 14028S  | STM14_4551   | 378452668 | + | 3989051-3989164 | hypothetical protein                 | 3996673-3996786 | + | 114 |
| 14028S  | STM14_4553   | 378452670 | + | 3989514-3989657 | hypothetical protein                 | 3997136-3997279 | + | 144 |
| 14028S  | STM14_4565   | 378452682 | + | 3999123-3999230 | hypothetical protein                 | 4006744-4006851 | + | 108 |
| 14028S  | STM14_4578   | 378452695 | + | 4011296-4011472 | hypothetical protein                 | 4018916-4019092 | + | 177 |
| 14028S  | STM14_4580   | 378452697 | + | 4011519-4011680 | hypothetical protein                 | 4019139-4019300 | + | 162 |
| 14028S  | STM14_4581   | 378452698 | + | 4011613-4011768 | hypothetical protein                 | 4019233-4019388 | + | 156 |
| 14028S  | STM14_4582   | 378452699 | + | 4011777-4011950 | hypothetical protein                 | 4019397-4019570 | + | 174 |
| D23580  | STM14_37861  | 378447163 | + | 4021208-4021303 | hypothetical protein                 | 4019645-4019740 | + | 96  |
| D23580  | STM14_37871  | 378447164 | + | 4021319-4021408 | putative LexA-regulated protein Tis8 | 4019756-4019845 | + | 90  |
| 14028S  | STM14_4589   | 378452704 | + | 4016572-4016697 | hypothetical protein                 | 4024193-4024318 | + | 126 |
| 14028S  | STM14_4596   | 378452710 | + | 4020774-4020987 | hypothetical protein                 | 4028395-4028508 | + | 114 |
| ST474   | STM474_3981  | 379703066 | - | 4028417-4028551 | hypothetical protein                 | 4028416-4028550 | - | 135 |
| 14028S  | STM14_4598   | 378452712 | + | 4022921-4023073 | hypothetical protein                 | 4030542-4030694 | + | 153 |
| 14028S  | STM14_4601   | 378452715 | + | 4024130-4024306 | hypothetical protein                 | 4031751-4031927 | + | 177 |
| ST474   | STM474_3986  | 379703070 | - | 4031907-4032026 | hypothetical protein                 | 4031906-4032025 | - | 120 |
| 14028S  | STM14_4630   | 378452743 | + | 4056093-4056239 | hypothetical protein                 | 4063714-4063860 | + | 147 |
| 14028S  | STM14_4633   | 378452746 | + | 4059079-4059237 | hypothetical protein                 | 4066700-4066858 | + | 159 |
| ST474   | STM474_4022  | 379703106 | - | 4071364-4071624 | hypothetical protein                 | 4071363-4071623 | - | 261 |
| T000240 | STM14_C40060 | 378986546 | - | 4156200-4156427 | hypothetical protein                 | 4072399-4072626 | - | 228 |
| 14028S  | STM14_4658   | 378452770 | + | 4086316-4086504 | hypothetical protein                 | 4093934-4094122 | + | 189 |
| 14028S  | STM14_4669   | 378452781 | + | 4094364-4094507 | hypothetical protein                 | 4101982-4102125 | + | 144 |
| 14028S  | STM14_4696   | 378452801 | + | 4122161-4122346 | hypothetical protein                 | 4130015-4130200 | + | 186 |
| 14028S  | ilvL         | 378452802 | + | 4122426-4122524 | ilvG operon leader peptide           | 4130280-4130378 | + | 99  |
| 14028S  | STM14_4733   | 378452833 | + | 4155257-4155382 | hypothetical protein                 | 4163111-4163236 | + | 126 |
| 14028S  | STM14_4738   | 378452838 | + | 4159908-4160012 | hypothetical protein                 | 4167762-4167866 | + | 105 |
| 14028S  | STM14_4740   | 378452840 | + | 4162570-4162710 | hypothetical protein                 | 4170424-4170564 | + | 141 |
| 14028S  | STM14_4753   | 378452852 | + | 4171444-4171629 | hypothetical protein                 | 4179298-4179483 | + | 186 |
| 14028S  | STM14_4759   | 378452858 | + | 4175211-4175348 | hypothetical protein                 | 4183065-4183202 | + | 138 |
| 14028S  | STM14_4768   | 378452867 | + | 4183187-4183360 | hypothetical protein                 | 4191041-4191214 | + | 174 |
| ST474   | STM474_4144  | 379703214 | + | 4193636-4193764 | hypothetical protein                 | 4193635-4193763 | + | 129 |
| 14028S  | STM14_4770   | 378452869 | + | 4185870-4186004 | hypothetical protein                 | 4193724-4193858 | + | 135 |
| 14028S  | STM14_4771   | 378452870 | + | 4185906-4186052 | hypothetical protein                 | 4193760-4193906 | + | 147 |
| 14028S  | STM14_4784   | 378452883 | + | 4197098-4197223 | hypothetical protein                 | 4204952-4205077 | + | 126 |
| 14028S  | STM14_4800   | 378452894 | + | 4215049-4215231 | hypothetical protein                 | 4222903-4223085 | + | 183 |
| 14028S  | STM14_4801   | 378452895 | + | 4215077-4215433 | hypothetical protein                 | 4222931-4223287 | + | 357 |
| 14028S  | STM14_4808   | 378452902 | + | 4219525-4219656 | hypothetical protein                 | 4227379-4227510 | + | 132 |
| 14028S  | STM14_4811   | 378452904 | + | 4222708-4222851 | hypothetical protein                 | 4230562-4230705 | + | 144 |
| 14028S  | STM14_4813   | 378452906 | + | 4223708-4223932 | putative cytoplasmic protein         | 4231562-4231786 | + | 225 |
| 14028S  | STM14_4816   | 378452909 | + | 4226121-4226246 | hypothetical protein                 | 4233975-4234100 | + | 126 |
| 14028S  | STM14_4819   | 378452912 | + | 4228860-4229039 | hypothetical protein                 | 4236714-4236893 | + | 180 |
| 14028S  | STM14_4821   | 378452914 | + | 4230571-4230990 | putative cytoplasmic protein         | 4238425-4238844 | + | 420 |
| 14028S  | STM14_4837   | 378452930 | + | 4248232-4248351 | hypothetical protein                 | 4256086-4256205 | + | 120 |
| ST474   | STM474_4210  | 379703274 | - | 4263051-4263284 | hypothetical protein                 | 4263050-4263283 | - | 234 |
| 14028S  | STM14_4854   | 378452947 | + | 4262409-4262564 | hypothetical protein                 | 4270263-4270418 | + | 156 |
| 14028S  | STM14_4856   | 378452949 | + | 4263770-4263904 | hypothetical protein                 | 4271624-4271758 | + | 135 |
| 14028S  | STM14_4858   | 378452951 | + | 4265002-4265130 | hypothetical protein                 | 4272856-4272984 | + | 129 |
| 14028S  | STM14_4867   | 378452960 | + | 4272347-4272496 | hypothetical protein                 | 4280201-4280350 | + | 150 |
| 14028S  | STM14_4868   | 378452961 | + | 4272426-4272560 | hypothetical protein                 | 4280280-4280414 | + | 135 |
| 14028S  | STM14_4872   | 378452965 | + | 4275521-4275652 | hypothetical protein                 | 4283375-4283506 | + | 132 |
| ST474   | STM474_4231  | 379703293 | + | 4283542-4283655 | hypothetical protein                 | 4283541-4283654 | + | 114 |





|        |            |           |   |                 |                           |                 |   |     |
|--------|------------|-----------|---|-----------------|---------------------------|-----------------|---|-----|
| 140285 | STM14_5481 | 378453545 | + | 4829440-4829619 | hypothetical protein      | 4837190-4837369 | + | 180 |
| 140285 | STM14_5486 | 378453550 | + | 4833992-4834120 | hypothetical protein      | 4841739-4841867 | + | 129 |
| 140285 | STM14_5496 | 378453560 | + | 4843995-4844144 | hypothetical protein      | 4851742-4851891 | + | 150 |
| ST474  | smp        | 379703819 | + | 4853656-4853805 | phosphoserine phosphatase | 4853655-4853804 | + | 150 |



|         |                |           |   |                 |                                               |                 |   |     |
|---------|----------------|-----------|---|-----------------|-----------------------------------------------|-----------------|---|-----|
| T000240 | STMDT12_C07050 | 378983246 | - | 742985-743125   | hypothetical protein                          | 704342-704482   | - | 141 |
| 140285  | STM14_0774     | 378449022 | + | 730309-730596   | hypothetical protein                          | 729223-729510   | + | 288 |
| 140285  | STM14_0777     | 378449025 | - | 733102-733251   | hypothetical protein                          | 732016-732165   | - | 150 |
| 140285  | STM14_0780     | 378449028 | - | 734838-734957   | hypothetical protein                          | 733752-733871   | - | 120 |
| 140285  | STM14_0791     | 378449032 | + | 739310-739477   | hypothetical protein                          | 738224-738391   | + | 168 |
| 140285  | STM14_0797     | 378449038 | - | 745470-745595   | hypothetical protein                          | 744384-744509   | - | 126 |
| 140285  | STM14_0800     | 378449041 | + | 749621-749734   | hypothetical protein                          | 748535-748648   | + | 114 |
| 140285  | STM14_0801     | 378449042 | + | 749864-750154   | hypothetical protein                          | 748778-749068   | + | 291 |
| 140285  | STM14_0809     | 378449050 | + | 757442-757591   | hypothetical protein                          | 756356-756505   | + | 150 |
| 140285  | STM14_0812     | 378449053 | + | 758607-758720   | hypothetical protein                          | 757521-757634   | + | 114 |
| 140285  | STM14_0819     | 378449060 | - | 766193-766318   | hypothetical protein                          | 765107-765232   | - | 126 |
| 140285  | STM14_0826     | 378449067 | - | 774532-774729   | K <sup>+</sup> -transporting ATPase subunit F | 773446-773643   | - | 198 |
| T000240 | STMDT12_C07730 | 378983314 | - | 820062-820163   | hypothetical protein                          | 780643-780744   | - | 102 |
| 140285  | STM14_0859     | 378449100 | + | 808472-808597   | hypothetical protein                          | 807386-807511   | + | 126 |
| 140285  | STM14_0860     | 378449101 | - | 809819-809962   | hypothetical protein                          | 808733-808876   | - | 144 |
| 140285  | STM14_0864     | 378449105 | + | 812877-813017   | hypothetical protein                          | 811791-811931   | + | 141 |
| 140285  | STM14_0873     | 378449114 | - | 818715-819254   | hypothetical protein                          | 817629-818168   | - | 540 |
| 140285  | STM14_0879     | 378449115 | - | 820227-820322   | hypothetical protein                          | 819141-819236   | - | 96  |
| 140285  | STM14_0897     | 378449132 | - | 837473-837664   | hypothetical protein                          | 836387-836578   | - | 192 |
| 140285  | STM14_0903     | 378449138 | + | 843123-843230   | hypothetical protein                          | 842037-842144   | + | 108 |
| 140285  | STM14_0924     | 378449158 | + | 864209-864493   | hypothetical protein                          | 863123-863407   | + | 285 |
| 140285  | STM14_0925     | 378449159 | + | 864550-864777   | hypothetical protein                          | 863464-863691   | + | 228 |
| 140285  | STM14_927      | 378449161 | + | 867104-867277   | putative cytoplasmic protein                  | 866018-866191   | + | 174 |
| 140285  | STM14_946      | 378449180 | - | 881747-881884   | hypothetical protein                          | 879950-880087   | - | 138 |
| 140285  | STM14_952      | 378449186 | - | 888006-888110   | hypothetical protein                          | 886209-886313   | - | 105 |
| 140285  | STM14_956      | 378449190 | + | 891948-892067   | hypothetical protein                          | 890151-890270   | + | 120 |
| 140285  | STM14_958      | 378449192 | - | 892325-892444   | hypothetical protein                          | 890528-890647   | - | 120 |
| 140285  | STM14_961      | 378449195 | + | 895674-895811   | hypothetical protein                          | 893883-894020   | + | 138 |
| 140285  | STM14_965      | 378449199 | - | 898059-898181   | hypothetical protein                          | 896268-896390   | - | 123 |
| 140285  | STM14_967      | 378449201 | - | 899158-899316   | hypothetical protein                          | 897367-897525   | - | 159 |
| 140285  | STM14_969      | 378449203 | - | 900254-900415   | hypothetical protein                          | 898463-898624   | - | 162 |
| 140285  | STM14_970      | 378449204 | - | 900375-900506   | hypothetical protein                          | 898584-898715   | - | 132 |
| 140285  | STM14_973      | 378449207 | + | 902910-903080   | hypothetical protein                          | 901119-901289   | + | 171 |
| 140285  | STM14_974      | 378449208 | - | 903009-903137   | hypothetical protein                          | 901218-901346   | - | 129 |
| 140285  | STM14_982      | 378449216 | + | 911396-911509   | hypothetical protein                          | 909605-909718   | + | 114 |
| 140285  | STM14_986      | 378449220 | - | 915878-916033   | hypothetical protein                          | 914087-914242   | - | 156 |
| 140285  | STM14_989      | 378449223 | + | 917997-918137   | hypothetical protein                          | 916206-916346   | + | 141 |
| 140285  | STM14_995      | 378449229 | - | 924480-924599   | hypothetical protein                          | 922689-922808   | - | 120 |
| 140285  | STM14_999      | 378449233 | + | 926622-926762   | hypothetical protein                          | 924831-924971   | + | 141 |
| 140285  | STM14_1000     | 378449234 | + | 926970-927134   | hypothetical protein                          | 925179-925343   | + | 165 |
| 140285  | STM14_1006     | 378449239 | - | 931103-931243   | hypothetical protein                          | 929312-929452   | - | 141 |
| 140285  | STM14_1010     | 378449243 | + | 934780-934917   | hypothetical protein                          | 932989-933126   | + | 138 |
| 140285  | STM14_1019     | 378449251 | + | 942902-943027   | hypothetical protein                          | 941111-941236   | + | 126 |
| 140285  | ybjC           | 378449256 | + | 946559-946849   | hypothetical protein                          | 944768-945058   | + | 291 |
| 140285  | STM14_1034     | 378449266 | + | 955378-955569   | hypothetical protein                          | 953586-953777   | + | 192 |
| 140285  | STM14_1038     | 378449270 | - | 958765-958965   | hypothetical protein                          | 956973-957173   | - | 201 |
| 140285  | STM14_1053     | 378449285 | + | 972908-973111   | hypothetical protein                          | 971116-971319   | + | 204 |
| 140285  | STM14_1055     | 378449287 | + | 973986-974153   | hypothetical protein                          | 972194-972361   | + | 168 |
| 140285  | STM14_1060     | 378449292 | - | 980013-980138   | hypothetical protein                          | 978221-978346   | - | 126 |
| 140285  | STM14_1061     | 378449293 | + | 980033-980176   | hypothetical protein                          | 978241-978384   | + | 144 |
| 140285  | STM14_1067     | 378449299 | - | 984062-984343   | hypothetical protein                          | 982270-982551   | - | 282 |
| 140285  | STM14_1069     | 378449301 | - | 985102-985260   | hypothetical protein                          | 983310-983468   | - | 159 |
| 140285  | STM14_1081     | 378449312 | - | 994689-994946   | hypothetical protein                          | 992897-993154   | - | 258 |
| 140285  | STM14_1082     | 378449313 | - | 994867-995142   | hypothetical protein                          | 993075-993350   | - | 276 |
| 140285  | STM14_1087     | 378449318 | + | 1001941-1002111 | hypothetical protein                          | 1000149-1000319 | + | 171 |
| 140285  | STM14_1092     | 378449323 | + | 1007647-1007754 | hypothetical protein                          | 1005855-1005962 | + | 108 |
| 140285  | STM14_1093     | 378449324 | - | 1007837-1007968 | hypothetical protein                          | 1006045-1006176 | - | 132 |
| 140285  | STM14_1102     | 378449333 | + | 1018831-1018959 | hypothetical protein                          | 1017039-1017167 | + | 129 |
| 140285  | STM14_1104     | 378449335 | + | 1019641-1019754 | hypothetical protein                          | 1017849-1017962 | + | 114 |
| 140285  | STM14_1108     | 378449339 | - | 1023127-1023381 | hypothetical protein                          | 1021335-1021589 | - | 255 |
| 140285  | STM14_1118     | 378449349 | - | 1033792-1033944 | hypothetical protein                          | 1032000-1032152 | - | 153 |
| 140285  | STM14_1129     | 378449360 | - | 1047995-1048126 | hypothetical protein                          | 1046203-1046334 | - | 132 |
| 140285  | STM14_1133     | 378449364 | - | 1051307-1051426 | hypothetical protein                          | 1049515-1049634 | - | 120 |
| 140285  | STM14_1135     | 378449366 | - | 1051897-1052118 | hypothetical protein                          | 1050105-1050326 | - | 222 |
| 140285  | STM14_1137     | 378449368 | + | 1053504-1053662 | hypothetical protein                          | 1051712-1051870 | + | 159 |
| 140285  | STM14_1146     | 378449377 | - | 1062948-1063106 | hypothetical protein                          | 1061156-1061314 | - | 159 |
| 140285  | STM14_1149     | 378449380 | + | 1063939-1064178 | hypothetical protein                          | 1062147-1062386 | + | 240 |
| 140285  | STM14_1157     | 378449388 | + | 1068009-1068230 | hypothetical protein                          | 1066217-1066438 | + | 222 |
| D23580  | STMMW_10422    | 378444470 | + | 1114868-1115074 | prophage protein                              | 1075559-1075765 | + | 207 |
| 140285  | STM14_1201     | 378449431 | - | 1106320-1106445 | hypothetical protein                          | 1104297-1104422 | - | 126 |
| 140285  | STM14_1209     | 378449439 | - | 1115818-1116021 | hypothetical protein                          | 1113796-1113999 | - | 204 |
| 140285  | STM14_1216     | 378449446 | - | 1121248-1121352 | hypothetical protein                          | 1119226-1119330 | - | 105 |
| T000240 | STMDT12_C11030 | 378983644 | + | 1169756-1169860 | hypothetical protein                          | 1128393-1128497 | + | 105 |
| 140285  | STM14_1234     | 378449463 | + | 1135671-1135796 | hypothetical protein                          | 1133649-1133774 | + | 126 |
| 140285  | STM14_1245     | 378449474 | + | 1143361-1143543 | hypothetical protein                          | 1141339-1141521 | + | 183 |
| 140285  | STM14_1249     | 378449478 | - | 1146275-1146388 | hypothetical protein                          | 1144253-1144366 | - | 114 |
| 140285  | STM14_1254     | 378449483 | - | 1150549-1150701 | hypothetical protein                          | 1148527-1148679 | - | 153 |
| 140285  | STM14_1260     | 378449489 | - | 1155618-1155782 | hypothetical protein                          | 1153596-1153760 | - | 165 |
| 140285  | STM14_1265     | 378449494 | - | 1158383-1158577 | hypothetical protein                          | 1156361-1156555 | - | 195 |
| 140285  | STM14_1279     | 378449506 | - | 1170030-1170278 | hypothetical protein                          | 1168008-1168256 | - | 249 |
| 140285  | STM14_1280     | 378449507 | - | 1170167-1170286 | hypothetical protein                          | 1168145-1168264 | - | 120 |
| 140285  | STM14_1282     | 378449509 | + | 1172347-1172457 | hypothetical protein                          | 1170325-1170435 | + | 111 |
| 140285  | STM14_1283     | 378449510 | + | 1172451-1172747 | hypothetical protein                          | 1170429-1170725 | + | 297 |
| 140285  | STM14_1286     | 378449512 | + | 1174679-1174783 | hypothetical protein                          | 1172657-1172761 | + | 105 |
| 140285  | STM14_1288     | 378449514 | + | 1176314-1176421 | hypothetical protein                          | 1174292-1174399 | + | 108 |
| 140285  | STM14_1289     | 378449515 | - | 1176396-1176605 | hypothetical protein                          | 1174374-1174583 | - | 210 |
| 140285  | STM14_1291     | 378449517 | - | 1177413-1177520 | hypothetical protein                          | 1175391-1175498 | - | 108 |
| 140285  | STM14_1292     | 378449518 | + | 1177573-1177704 | hypothetical protein                          | 1175551-1175682 | + | 132 |
| 140285  | STM14_1307     | 378449532 | - | 1188559-1188696 | hypothetical protein                          | 1186537-1186674 | - | 138 |
| 140285  | STM14_1308     | 378449533 | - | 1188894-1189040 | hypothetical protein                          | 1186872-1187018 | - | 147 |
| 140285  | STM14_1316     | 378449541 | - | 1194339-1194509 | hypothetical protein                          | 1192318-1192488 | - | 171 |
| 140285  | STM14_1322     | 378449547 | + | 1200601-1201062 | hypothetical protein                          | 1198580-1199041 | + | 462 |
| 140285  | STM14_1339     | 378449564 | - | 1212983-1213159 | hypothetical protein                          | 1210962-1211138 | - | 177 |

|         |                |           |   |                 |                                                       |                 |   |     |
|---------|----------------|-----------|---|-----------------|-------------------------------------------------------|-----------------|---|-----|
| 14028S  | STM14_1344     | 378449569 | - | 1216241-1216396 | flagellar basal body P-ring biosynthesis protein FlgA | 1214220-1214375 | - | 156 |
| 14028S  | STM14_1356     | 378449581 | - | 1226280-1226474 | hypothetical protein                                  | 1224259-1224453 | - | 195 |
| 14028S  | STM14_1361     | 378449585 | + | 1232358-1232582 | hypothetical protein                                  | 1230337-1230561 | + | 225 |
| 14028S  | STM14_1376     | 378449600 | - | 1244261-1244398 | hypothetical protein                                  | 1242240-1242377 | - | 138 |
| 14028S  | STM14_1390     | 378449614 | - | 1256910-1257065 | hypothetical protein                                  | 1254889-1255044 | - | 156 |
| 14028S  | STM14_1399     | 378449623 | - | 1267794-1267916 | hypothetical protein                                  | 1265773-1265895 | - | 123 |
| 14028S  | STM14_1401     | 378449625 | - | 1269076-1269240 | hypothetical protein                                  | 1267055-1267219 | - | 165 |
| 14028S  | STM14_1487     | 378449708 | - | 1337214-1337372 | hypothetical protein                                  | 1284092-1284250 | - | 159 |
| 14028S  | STM14_1488     | 378449709 | + | 1337312-1337452 | hypothetical protein                                  | 1284190-1284330 | + | 141 |
| 14028S  | STM14_1489     | 378449710 | + | 1337337-1337585 | hypothetical protein                                  | 1284215-1284463 | + | 249 |
| LT2     | STM05040       | 409994415 | - | 1327664-1327867 | hypothetical protein                                  | 1284517-1284720 | - | 204 |
| 14028S  | STM14_1494     | 378449714 | - | 1340405-1340575 | hypothetical protein                                  | 1287283-1287453 | - | 171 |
| 14028S  | STM14_1496     | 378449716 | - | 1341060-1341188 | hypothetical protein                                  | 1287938-1288066 | - | 129 |
| 14028S  | STM14_1499     | 378449718 | + | 1341718-1341825 | hypothetical protein                                  | 1288596-1288703 | + | 108 |
| 14028S  | STM14_1500     | 378449719 | - | 1342043-1342192 | hypothetical protein                                  | 1288921-1289070 | - | 150 |
| 14028S  | STM14_1502     | 378449721 | - | 1342962-1343096 | hypothetical protein                                  | 1289840-1289974 | - | 135 |
| 14028S  | STM14_1506     | 378449723 | - | 1344493-1344636 | hypothetical protein                                  | 1291371-1291514 | - | 144 |
| 14028S  | STM14_1510     | 378449727 | - | 1346067-1346216 | putative inner membrane protein                       | 1292945-1293094 | - | 150 |
| 14028S  | STM14_1514     | 378449731 | - | 1348508-1348666 | hypothetical protein                                  | 1295386-1295544 | - | 159 |
| 14028S  | STM14_1524     | 378449740 | - | 1356451-1356600 | hypothetical protein                                  | 1303329-1303478 | - | 150 |
| 14028S  | STM14_1528     | 378449744 | + | 1358977-1359201 | hypothetical protein                                  | 1305855-1306079 | + | 225 |
| 14028S  | STM14_1533     | 378449749 | - | 1361225-1361380 | hypothetical protein                                  | 1308103-1308258 | - | 156 |
| 14028S  | STM14_1536     | 378449752 | - | 1362034-1362159 | hypothetical protein                                  | 1308911-1309036 | - | 126 |
| 14028S  | STM14_1541     | 378449757 | - | 1363501-1363599 | hypothetical protein                                  | 1310378-1310476 | - | 99  |
| 14028S  | STM14_1545     | 378449761 | - | 1364743-1364856 | hypothetical protein                                  | 1311620-1311733 | - | 114 |
| 14028S  | STM14_1546     | 378449762 | + | 1364774-1364911 | hypothetical protein                                  | 1311651-1311788 | + | 138 |
| 14028S  | STM14_1550     | 378449766 | + | 1367385-1367522 | hypothetical protein                                  | 1314262-1314399 | + | 138 |
| 14028S  | STM14_1554     | 378449770 | + | 1370048-1370245 | hypothetical protein                                  | 1316925-1317122 | + | 198 |
| 14028S  | STM14_1555     | 378449771 | + | 1370136-1370267 | salivary secreted protein                             | 1317013-1317144 | + | 132 |
| 14028S  | STM14_1557     | 378449773 | + | 1371682-1371801 | hypothetical protein                                  | 1318559-1318678 | + | 120 |
| 14028S  | STM14_1559     | 378449775 | - | 1373854-1374027 | hypothetical protein                                  | 1320730-1320903 | - | 174 |
| 14028S  | STM14_1564     | 378449780 | - | 1378335-1378511 | hypothetical protein                                  | 1325211-1325387 | - | 177 |
| 14028S  | STM14_1566     | 378449782 | + | 1379655-1379795 | hypothetical protein                                  | 1326531-1326671 | + | 141 |
| 14028S  | STM14_1569     | 378449785 | + | 1380898-1381002 | hypothetical protein                                  | 1327775-1327879 | + | 105 |
| 14028S  | STM14_1572     | 378449788 | + | 1382785-1382889 | hypothetical protein                                  | 1329662-1329766 | + | 105 |
| 14028S  | STM14_1581     | 378449797 | + | 1391859-1392038 | hypothetical protein                                  | 1338736-1338915 | + | 180 |
| 14028S  | STM14_1587     | 378449803 | + | 1398234-1398449 | hypothetical protein                                  | 1345111-1345326 | + | 216 |
| 14028S  | STM14_1591     | 378449807 | - | 1400923-1401129 | hypothetical protein                                  | 1347800-1348006 | - | 207 |
| 14028S  | STM14_1593     | 378449809 | + | 1401610-1401732 | hypothetical protein                                  | 1348487-1348609 | + | 123 |
| 14028S  | STM14_1601     | 378449817 | + | 1409372-1409509 | hypothetical protein                                  | 1356249-1356386 | + | 138 |
| 14028S  | STM14_1602     | 378449818 | - | 1409399-1409647 | hypothetical protein                                  | 1356276-1356524 | - | 249 |
| 14028S  | STM14_1615     | 378449831 | + | 1419534-1419740 | hypothetical protein                                  | 1366411-1366617 | + | 207 |
| 14028S  | STM14_1617     | 378449833 | + | 1421769-1421954 | hypothetical protein                                  | 1368646-1368831 | + | 186 |
| 14028S  | STM14_1618     | 378449834 | + | 1421956-1422090 | hypothetical protein                                  | 1368833-1368967 | + | 135 |
| 14028S  | STM14_1623     | 378449839 | - | 1425398-1425562 | hypothetical protein                                  | 1372275-1372439 | - | 165 |
| 14028S  | STM14_1631     | 378449847 | - | 1432577-1432696 | hypothetical protein                                  | 1379454-1379573 | - | 120 |
| 14028S  | STM14_1636     | 378449852 | + | 1436467-1436571 | hypothetical protein                                  | 1383344-1383448 | + | 105 |
| 14028S  | STM14_1638     | 378449854 | - | 1437586-1437699 | hypothetical protein                                  | 1384463-1384576 | - | 114 |
| 14028S  | STM14_1645     | 378449861 | - | 1445506-1445658 | hypothetical protein                                  | 1392383-1392535 | - | 153 |
| 14028S  | STM14_1652     | 378449868 | + | 1452598-1452744 | hypothetical protein                                  | 1399474-1399620 | + | 147 |
| 14028S  | STM14_1653     | 378449869 | - | 1452728-1452838 | hypothetical protein                                  | 1399604-1399714 | - | 111 |
| 14028S  | STM14_1658     | 378449873 | - | 1456308-1456475 | hypothetical protein                                  | 1403184-1403351 | - | 168 |
| 14028S  | STM14_1685     | 378449900 | - | 1486016-1486129 | hypothetical protein                                  | 1432892-1433005 | - | 114 |
| 14028S  | STM14_1692     | 378449907 | + | 1493410-1493517 | hypothetical protein                                  | 1440286-1440393 | + | 108 |
| 14028S  | STM14_1719     | 378449934 | + | 1511477-1511602 | hypothetical protein                                  | 1458353-1458478 | + | 126 |
| 14028S  | STM14_1728     | 378449941 | + | 1519171-1519452 | hypothetical protein                                  | 1466047-1466328 | + | 282 |
| 14028S  | STM14_1751     | 378449964 | + | 1538110-1538277 | hypothetical protein                                  | 1484986-1485153 | + | 168 |
| 14028S  | STM14_1761     | 410023179 | - | 1546024-1546179 | hypothetical protein                                  | 1492900-1493055 | - | 156 |
| 14028S  | STM14_1764     | 378449977 | + | 1548438-1548683 | hypothetical protein                                  | 1495314-1495559 | + | 246 |
| 14028S  | STM14_1771     | 378449982 | + | 1553745-1553906 | fumarase A                                            | 1500621-1500782 | + | 162 |
| 14028S  | STM14_1776     | 378449987 | - | 1559385-1559690 | outer membrane protein                                | 1506261-1506566 | - | 306 |
| 14028S  | STM14_1782     | 378449992 | - | 1563882-1564016 | putative amino acid permease                          | 1510758-1510892 | - | 135 |
| 14028S  | STM14_1783     | 378449993 | - | 1563914-1564087 | hypothetical protein                                  | 1510790-1510963 | - | 174 |
| 14028S  | STM14_1784     | 378449994 | + | 1564099-1564224 | hypothetical protein                                  | 1510975-1511100 | + | 126 |
| 14028S  | STM14_1786     | 378449996 | + | 1565234-1565359 | hypothetical protein                                  | 1512110-1512235 | + | 126 |
| 14028S  | STM14_1794     | 378450004 | - | 1571734-1572027 | hypothetical protein                                  | 1518610-1518903 | - | 294 |
| 14028S  | STM14_1796     | 378450006 | - | 1572462-1572653 | hypothetical protein                                  | 1519338-1519529 | - | 192 |
| T000240 | STMDT12_C14990 | 378984040 | + | 1560231-1560323 | hypothetical protein                                  | 1519396-1519488 | + | 93  |
| 14028S  | STM14_1810     | 378450020 | - | 1586812-1587033 | putative dimethyl sulfoxide reductase subunit A       | 1533688-1533909 | - | 222 |
| 14028S  | STM14_1816     | 378450026 | - | 1591641-1591757 | hypothetical protein                                  | 1538517-1538633 | - | 117 |
| 14028S  | STM14_1827     | 378450036 | - | 1601704-1601919 | hypothetical protein                                  | 1548580-1548795 | - | 216 |
| 14028S  | STM14_1828     | 378450037 | + | 1601786-1601923 | peptidyl-diipeptidase dcp                             | 1548662-1548799 | + | 138 |
| 14028S  | STM14_1831     | 378450040 | - | 1602970-1603068 | hypothetical protein                                  | 1549846-1549944 | - | 99  |
| 14028S  | STM14_1833     | 378450042 | - | 1603865-1604014 | hypothetical protein                                  | 1550741-1550890 | - | 150 |
| T000240 | STMDT12_C15310 | 378984072 | - | 1591761-1591856 | hypothetical protein                                  | 1550924-1551019 | - | 96  |
| 14028S  | STM14_1847     | 378450056 | + | 1615524-1615850 | putative inner membrane protein                       | 1562400-1562726 | + | 327 |
| 14028S  | STM14_1867     | 378450076 | - | 1634718-1634879 | hypothetical protein                                  | 1581594-1581755 | - | 162 |
| 14028S  | STM14_1872     | 378450081 | + | 1637216-1637431 | putative phage-related secreted protein               | 1584092-1584307 | + | 216 |
| UK1     | STMUK_1520     | 378988892 | + | 1587048-1587440 | hypothetical protein                                  | 1585733-1586125 | + | 393 |
| UK1     | STMUK_1521     | 378988893 | + | 1587577-1587705 | hypothetical protein                                  | 1586262-1586390 | + | 129 |
| 14028S  | STM14_1876     | 378450084 | - | 1639903-1640112 | hypothetical protein                                  | 1586779-1586988 | - | 210 |
| 14028S  | STM14_1890     | 378450098 | + | 1657503-1657634 | hypothetical protein                                  | 1604379-1604510 | + | 132 |
| 14028S  | STM14_1895     | 378450103 | + | 1663489-1663641 | hypothetical protein                                  | 1610365-1610517 | + | 153 |
| 14028S  | STM14_1897     | 378450105 | - | 1664885-1665067 | hypothetical protein                                  | 1611761-1611943 | - | 183 |
| 14028S  | STM14_1902     | 378450110 | + | 1668962-1669093 | hypothetical protein                                  | 1615838-1615969 | + | 132 |
| 14028S  | STM14_1904     | 378450112 | - | 1670559-1670702 | hypothetical protein                                  | 1617435-1617578 | - | 144 |
| 14028S  | STM14_1911     | 378450119 | - | 1679194-1679457 | hypothetical protein                                  | 1626070-1626333 | - | 264 |
| 14028S  | STM14_1913     | 378450121 | + | 1680178-1680390 | hypothetical protein                                  | 1627054-1627266 | + | 213 |
| 14028S  | STM14_1914     | 378450122 | - | 1680335-1680472 | hypothetical protein                                  | 1627211-1627348 | - | 138 |
| 14028S  | STM14_1915     | 378450123 | + | 1680342-1680476 | hypothetical protein                                  | 1627218-1627352 | + | 135 |
| 14028S  | STM14_1919     | 378450127 | - | 1683664-1683783 | hypothetical protein                                  | 1630540-1630659 | - | 120 |
| 14028S  | STM14_1922     | 378450130 | + | 1686850-1686969 | hypothetical protein                                  | 1633726-1633845 | + | 120 |
| 14028S  | STM14_1923     | 378450131 | - | 1686958-1687080 | hypothetical protein                                  | 1633834-1633956 | - | 123 |

|         |                |           |   |                 |                                    |                 |   |     |
|---------|----------------|-----------|---|-----------------|------------------------------------|-----------------|---|-----|
| 140285  | STM14_1932     | 410023183 | + | 1696611-1696706 | hypothetical protein               | 1643487-1643582 | + | 96  |
| 140285  | STM14_1933     | 378450141 | + | 1696703-1696807 | hypothetical protein               | 1643579-1643683 | + | 105 |
| 140285  | STM14_1937     | 378450145 | + | 1700960-1701190 | putative inner membrane protein    | 1647836-1648066 | - | 231 |
| 140285  | STM14_1939     | 378450147 | - | 1701681-1701785 | hypothetical protein               | 1648557-1648661 | - | 105 |
| 140285  | STM14_1950     | 378450158 | + | 1711642-1711749 | hypothetical protein               | 1658518-1658625 | + | 108 |
| 140285  | STM14_1961     | 378450169 | + | 1719701-1719814 | hypothetical protein               | 1666577-1666690 | + | 114 |
| 140285  | STM14_1967     | 378450175 | + | 1727480-1727695 | hypothetical protein               | 1674356-1674571 | + | 216 |
| 140285  | STM14_1970     | 378450178 | + | 1729598-1729999 | putative dipicolinate reductase    | 1676474-1676875 | + | 402 |
| T000240 | STMDT12_C16480 | 378984189 | - | 1717552-1717677 | hypothetical protein               | 1676714-1676839 | - | 126 |
| 140285  | STM14_1972     | 378450180 | - | 1731028-1731132 | hypothetical protein               | 1677904-1678008 | - | 105 |
| 140285  | STM14_1973     | 378450181 | + | 1731115-1731225 | hypothetical protein               | 1677991-1678101 | + | 111 |
| 140285  | STM14_1976     | 378450184 | - | 1733662-1733814 | hypothetical protein               | 1680538-1680690 | - | 153 |
| T000240 | STMDT12_C16570 | 378984198 | - | 1726118-1726213 | hypothetical protein               | 1685280-1685375 | - | 96  |
| 140285  | STM14_1996     | 378450204 | - | 1755685-1755894 | hypothetical protein               | 1702561-1702770 | - | 210 |
| T000240 | STMDT12_C16740 | 378984215 | - | 1744637-1744789 | hypothetical protein               | 1703799-1703951 | - | 153 |
| 140285  | STM14_2004     | 378450212 | - | 1762419-1762580 | hypothetical protein               | 1709295-1709456 | - | 162 |
| 140285  | STM14_2024     | 378450229 | - | 1779789-1779902 | hypothetical protein               | 1726665-1726778 | - | 114 |
| 140285  | STM14_2048     | 378450253 | - | 1800491-1800637 | hypothetical protein               | 1746655-1746801 | - | 147 |
| 140285  | STM14_2049     | 378450254 | + | 1800647-1800769 | hypothetical protein               | 1746811-1746933 | + | 123 |
| 140285  | STM14_2054     | 378450259 | - | 1803682-1803798 | hypothetical protein               | 1749846-1749962 | - | 117 |
| 140285  | STM14_2057     | 378450262 | + | 1807079-1807216 | hypothetical protein               | 1753243-1753380 | + | 138 |
| 140285  | STM14_2061     | 378450266 | - | 1810467-1810628 | hypothetical protein               | 1756631-1756792 | - | 162 |
| 140285  | STM14_2065     | 378450270 | + | 1812029-1812142 | hypothetical protein               | 1758193-1758306 | + | 114 |
| 140285  | STM14_2073     | 378450278 | + | 1820026-1820190 | hypothetical protein               | 1766190-1766354 | + | 165 |
| 140285  | STM14_2076     | 378450281 | - | 1823233-1823364 | hypothetical protein               | 1769397-1769528 | - | 132 |
| 140285  | STM14_2079     | 378450284 | + | 1824904-1825014 | hypothetical protein               | 1771068-1771178 | + | 111 |
| 140285  | STM14_2111     | 378450314 | + | 1851996-1852310 | putative inner membrane protein    | 1798160-1798474 | + | 315 |
| 140285  | STM14_2117     | 378450320 | + | 1858398-1858580 | hypothetical protein               | 1804562-1804744 | + | 183 |
| 140285  | STM14_2123     | 378450326 | - | 1863160-1863279 | hypothetical protein               | 1809324-1809443 | - | 120 |
| 140285  | STM14_2133     | 378450333 | + | 1872924-1873043 | hypothetical protein               | 1819088-1819207 | + | 120 |
| 140285  | STM14_2135     | 378450335 | - | 1874718-1874903 | hypothetical protein               | 1820882-1821067 | - | 186 |
| 140285  | STM14_2152     | 378450352 | - | 1888329-1888433 | hypothetical protein               | 1834493-1834597 | - | 105 |
| 140285  | STM14_2160     | 378450360 | - | 1895293-1895421 | hypothetical protein               | 1841457-1841585 | - | 129 |
| 140285  | STM14_2180     | 378450380 | - | 1914824-1914934 | hypothetical protein               | 1860988-1861098 | - | 111 |
| 140285  | STM14_2187     | 378450387 | + | 1920441-1920557 | hypothetical protein               | 1866605-1866721 | + | 117 |
| 140285  | STM14_2189     | 378450389 | - | 1920801-1920899 | hypothetical protein               | 1866965-1867063 | - | 99  |
| 140285  | STM14_2200     | 378450400 | + | 1928329-1928535 | hypothetical protein               | 1874492-1874698 | + | 207 |
| 140285  | STM14_2219     | 378450419 | - | 1946749-1946859 | hypothetical protein               | 1892912-1893022 | - | 111 |
| 140285  | STM14_2222     | 378450422 | + | 1947434-1947541 | hypothetical protein               | 1893597-1893704 | + | 108 |
| 140285  | STM14_2224     | 378450424 | - | 1947624-1947740 | hypothetical protein               | 1893787-1893903 | - | 117 |
| T000240 | STMDT12_C18620 | 378984403 | - | 1934900-1935001 | hypothetical protein               | 1895123-1895244 | - | 102 |
| 140285  | STM14_2229     | 378450429 | - | 1949871-1949978 | hypothetical protein               | 1896034-1896141 | - | 108 |
| 140285  | STM14_2238     | 378450438 | + | 1961391-1961522 | hypothetical protein               | 1907554-1907685 | + | 132 |
| 140285  | STM14_2243     | 378450443 | + | 1963183-1963311 | hypothetical protein               | 1909346-1909474 | + | 129 |
| 140285  | STM14_2245     | 378450445 | + | 1964429-1964551 | hypothetical protein               | 1910592-1910714 | + | 123 |
| 140285  | STM14_2246     | 378450446 | - | 1964644-1964781 | hypothetical protein               | 1910807-1910950 | - | 144 |
| D23580  | STM14_18461    | 378445260 | + | 1947071-1947241 | hypothetical protein               | 1911409-1911579 | + | 171 |
| 140285  | STM14_2250     | 378450450 | - | 1966960-1967154 | hypothetical protein               | 1913123-1913317 | - | 195 |
| 140285  | STM14_2255     | 378450453 | - | 1970094-1970294 | hypothetical protein               | 1916257-1916457 | - | 201 |
| 140285  | STM14_2260     | 378450457 | - | 1973190-1973366 | hypothetical protein               | 1919353-1919529 | - | 177 |
| 140285  | STM14_2263     | 378450459 | - | 1973981-1974151 | hypothetical protein               | 1920144-1920314 | - | 171 |
| 140285  | STM14_2264     | 378450460 | + | 1974277-1974393 | tail fiber assembly protein        | 1920440-1920556 | + | 117 |
| 140285  | STM14_2270     | 378450466 | + | 1976705-1976878 | hypothetical protein               | 1922868-1923041 | + | 174 |
| 140285  | STM14_2276     | 378450471 | - | 1979312-1979440 | hypothetical protein               | 1925475-1925603 | - | 129 |
| T000240 | STMDT12_C19080 | 378984449 | + | 1972383-1972478 | hypothetical protein               | 1934410-1934505 | + | 96  |
| 140285  | STM14_2291     | 378450486 | - | 1990827-1990985 | hypothetical protein               | 1936990-1937148 | - | 159 |
| 140285  | STM14_2293     | 378450488 | + | 1992662-1992787 | hypothetical protein               | 1938825-1938950 | + | 126 |
| 140285  | STM14_2294     | 378450489 | - | 1992755-1992874 | hypothetical protein               | 1938918-1939037 | - | 120 |
| 140285  | STM14_2298     | 378450493 | + | 1996367-1996594 | hypothetical protein               | 1942530-1942757 | + | 228 |
| 140285  | STM14_2305     | 378450500 | + | 2002147-2002269 | hypothetical protein               | 1948310-1948432 | + | 123 |
| 140285  | STM14_2313     | 378450507 | + | 2008446-2008562 | hypothetical protein               | 1954609-1954725 | + | 117 |
| 140285  | STM14_2321     | 378450515 | + | 2013869-2013985 | hypothetical protein               | 1960032-1960148 | + | 117 |
| 140285  | STM14_2323     | 378450517 | + | 2015793-2015897 | hypothetical protein               | 1961956-1962060 | + | 105 |
| 140285  | STM14_2329     | 378450523 | + | 2022930-2023187 | hypothetical protein               | 1969093-1969350 | + | 258 |
| 140285  | STM14_2339     | 378450533 | - | 2032400-2032531 | hypothetical protein               | 1978563-1978694 | - | 132 |
| 140285  | STM14_2342     | 378450536 | - | 2033684-2033827 | hypothetical protein               | 1979847-1979990 | - | 144 |
| 140285  | STM14_2343     | 378450537 | + | 2034145-2034261 | hypothetical protein               | 1980308-1980424 | + | 117 |
| 140285  | STM14_2349     | 378450542 | + | 2038156-2038305 | hypothetical protein               | 1984319-1984468 | + | 150 |
| T000240 | STMDT12_C19550 | 378984496 | - | 2022485-2022580 | hypothetical protein               | 1984512-1984607 | - | 96  |
| D23580  | STM14_19262    | 378445334 | - | 2022476-2022553 | hypothetical protein               | 1996534-1996611 | - | 78  |
| 140285  | STM14_2366     | 378450556 | + | 2050620-2050775 | putative inner membrane protein    | 1996783-1996938 | + | 156 |
| 140285  | STM14_2379     | 378450569 | - | 2060568-2060705 | hypothetical protein               | 2006731-2006868 | - | 138 |
| 140285  | STM14_2387     | 378450577 | + | 2066907-2067293 | putative 50S ribosomal protein     | 2013070-2013456 | + | 387 |
| 140285  | STM14_2411     | 378450600 | + | 2084253-2084468 | hypothetical protein               | 2030416-2030631 | + | 216 |
| 140285  | STM14_2417     | 378450606 | + | 2088843-2088962 | hypothetical protein               | 2035006-2035125 | + | 120 |
| 140285  | STM14_2419     | 378450608 | - | 2090431-2090643 | putative cold-shock protein        | 2036594-2036806 | - | 213 |
| 140285  | STM14_2421     | 378450610 | - | 2091089-2091208 | hypothetical protein               | 2037252-2037371 | - | 120 |
| 140285  | STM14_2425     | 378450614 | - | 2093253-2093495 | hypothetical protein               | 2039416-2039658 | - | 243 |
| 140285  | STM14_2429     | 378450617 | - | 2095348-2095497 | hypothetical protein               | 2041511-2041660 | - | 150 |
| 140285  | STM14_2442     | 378450629 | - | 2106970-2107134 | hypothetical protein               | 2053134-2053298 | - | 165 |
| 140285  | STM14_2455     | 378450642 | - | 2115201-2115503 | hypothetical protein               | 2061365-2061667 | - | 303 |
| 140285  | STM14_2456     | 378450643 | - | 2115612-2115710 | hypothetical protein               | 2061776-2061874 | - | 99  |
| 140285  | STM14_2462     | 378450649 | - | 2118324-2118683 | hypothetical protein               | 2064488-2064847 | - | 360 |
| 140285  | STM14_2466     | 378450653 | - | 2121222-2121611 | crossover junction protein         | 2067386-2067775 | - | 390 |
| 140285  | STM14_2468     | 378450655 | - | 2122501-2123025 | putative transcriptional activator | 2068665-2069189 | - | 525 |
| 140285  | STM14_2470     | 378450657 | - | 2123800-2124024 | hypothetical protein               | 2069964-2070188 | - | 225 |
| 140285  | STM14_2473     | 378450660 | - | 2125758-2125982 | DNA binding protein                | 2071922-2072146 | - | 225 |
| 140285  | STM14_2478     | 378450665 | + | 2129593-2129823 | hypothetical protein               | 2075757-2075987 | + | 231 |
| 140285  | STM14_2479     | 378450666 | + | 2129820-2130335 | hypothetical protein               | 2075984-2076499 | + | 516 |
| 140285  | STM14_2483     | 378450670 | + | 2132377-2132619 | hypothetical protein               | 2078541-2078783 | + | 243 |
| T000240 | STMDT12_C20240 | 378984565 | - | 2079358-2079462 | hypothetical protein               | 2081532-2081636 | - | 105 |
| SL1344  | SL1344_1980    | 378699918 | + | 2082737-2083009 | hypothetical protein               | 2082737-2083009 | + | 273 |
| 798     | UMN798_2172    | 383496723 | - | 2087536-2087634 | hypothetical protein               | 2088175-2088273 | - | 99  |

|         |                |           |   |                 |                                                 |                 |   |     |
|---------|----------------|-----------|---|-----------------|-------------------------------------------------|-----------------|---|-----|
| T000240 | STMDT12_C20320 | 378984573 | + | 2086418-2086567 | hypothetical protein                            | 2088592-2088741 | + | 150 |
| 140285  | STM14_2494     | 378450678 | - | 2142487-2142741 | hypothetical protein                            | 2088651-2088905 | - | 255 |
| 140285  | STM14_2497     | 378450681 | - | 2144828-2145214 | hypothetical protein                            | 2090992-2091378 | - | 387 |
| 140285  | STM14_2501     | 378450684 | - | 2147387-2147539 | hypothetical protein                            | 2093551-2093703 | - | 153 |
| 140285  | STM14_2524     | 378450706 | - | 2165668-2165799 | hypothetical protein                            | 2111832-2111963 | - | 132 |
| 140285  | STM14_2549     | 378450731 | - | 2185570-2185701 | hypothetical protein                            | 2131733-2131864 | - | 132 |
| 140285  | STM14_2556     | 378450738 | - | 2192950-2193219 | hypothetical protein                            | 2139113-2139382 | - | 270 |
| 140285  | STM14_2558     | 378450740 | - | 2195674-2195796 | hypothetical protein                            | 2141837-2141959 | - | 123 |
| 140285  | STM14_2561     | 378450743 | + | 2198729-2198896 | hypothetical protein                            | 2144892-2145059 | + | 168 |
| 140285  | STM14_2562     | 378450744 | - | 2198740-2198937 | hypothetical protein                            | 2144903-2145100 | - | 198 |
| 140285  | STM14_2599     | 378450781 | + | 2239941-2240216 | hypothetical protein                            | 2186104-2186379 | + | 276 |
| 140285  | STM14_2614     | 378450796 | + | 2254277-2254522 | hypothetical protein                            | 2200440-2200685 | + | 246 |
| 140285  | STM14_2635     | 378450816 | - | 2282708-2282821 | hypothetical protein                            | 2228871-2228984 | - | 114 |
| 140285  | STM14_2639     | 378450819 | + | 2285114-2285233 | hypothetical protein                            | 2231277-2231396 | + | 120 |
| 140285  | STM14_2649     | 378450829 | - | 2293497-2293682 | hypothetical protein                            | 2239660-2239845 | - | 186 |
| 140285  | STM14_2651     | 378450831 | - | 2294185-2294343 | hypothetical protein                            | 2240348-2240506 | - | 159 |
| 140285  | STM14_2671     | 378450851 | - | 2315124-2315237 | hypothetical protein                            | 2261287-2261400 | - | 114 |
| 140285  | STM14_2674     | 378450854 | - | 2317916-2318191 | hypothetical protein                            | 2264079-2264354 | - | 276 |
| 140285  | STM14_2676     | 378450856 | + | 2318810-2318917 | hypothetical protein                            | 2264973-2265080 | + | 108 |
| 140285  | STM14_2697     | 378450877 | + | 2338065-2338184 | hypothetical protein                            | 2284228-2284347 | + | 120 |
| 140285  | STM14_2701     | 378450881 | + | 2340683-2340847 | hypothetical protein                            | 2286846-2287010 | + | 165 |
| 140285  | STM14_2704     | 378450884 | - | 2342649-2342762 | hypothetical protein                            | 2288812-2288925 | - | 114 |
| 140285  | STM14_2705     | 378450885 | - | 2342720-2342848 | hypothetical protein                            | 2288883-2288911 | - | 129 |
| 140285  | STM14_2706     | 378450886 | + | 2342834-2343067 | hypothetical protein                            | 2288997-2289230 | + | 234 |
| 140285  | STM14_2710     | 378450890 | - | 2345635-2345787 | hypothetical protein                            | 2291798-2291950 | - | 153 |
| 140285  | STM14_2714     | 378450894 | + | 2349999-2350304 | hypothetical protein                            | 2296162-2296467 | + | 306 |
| 140285  | STM14_2716     | 378450896 | - | 2351963-2352097 | hypothetical protein                            | 2298126-2298260 | - | 135 |
| 140285  | STM14_2724     | 378450904 | + | 2358928-2359059 | hypothetical protein                            | 2305091-2305222 | + | 132 |
| UK1     | STMUK_2237     | 378989594 | - | 2307167-2307274 | hypothetical protein                            | 2305138-2305245 | - | 108 |
| 140285  | STM14_2726     | 378450906 | - | 2359149-2359277 | hypothetical protein                            | 2305312-2305440 | - | 129 |
| 140285  | STM14_2730     | 378450910 | - | 2361472-2361576 | hypothetical protein                            | 2307635-2307739 | - | 105 |
| 140285  | STM14_2736     | 378450915 | - | 2364975-2365205 | hypothetical protein                            | 2311138-2311368 | - | 231 |
| 140285  | STM14_2738     | 378450917 | + | 2365897-2366040 | hypothetical protein                            | 2312060-2312203 | + | 144 |
| 140285  | STM14_2750     | 378450929 | - | 2378246-2378392 | hypothetical protein                            | 2324409-2324555 | - | 147 |
| T000240 | STMDT12_C22520 | 378984793 | - | 2327280-2327405 | hypothetical protein                            | 2329453-2329578 | - | 126 |
| 140285  | STM14_2764     | 378450942 | - | 2389094-2389207 | hypothetical protein                            | 2335257-2335370 | - | 114 |
| 140285  | STM14_2774     | 378450952 | + | 2397715-2397861 | hypothetical protein                            | 2343878-2344024 | + | 147 |
| 140285  | STM14_2791     | 378450969 | + | 2411310-2411441 | hypothetical protein                            | 2357473-2357604 | + | 132 |
| 140285  | STM14_2798     | 378450976 | + | 2418131-2418256 | hypothetical protein                            | 2364294-2364419 | + | 126 |
| 140285  | STM14_2803     | 378450980 | - | 2425164-2425280 | hypothetical protein                            | 2371327-2371443 | - | 117 |
| 140285  | STM14_2805     | 378450982 | + | 2427980-2428210 | hypothetical protein                            | 2374143-2374373 | + | 231 |
| 140285  | STM14_2806     | 378450983 | + | 2428153-2428293 | hypothetical protein                            | 2374316-2374456 | + | 141 |
| 140285  | STM14_2811     | 378450988 | + | 2432657-2432773 | hypothetical protein                            | 2378820-2378936 | + | 117 |
| 140285  | STM14_2822     | 378450999 | + | 2445948-2446052 | hypothetical protein                            | 2392111-2392215 | + | 105 |
| 140285  | STM14_2823     | 378451000 | + | 2446155-2446358 | hypothetical protein                            | 2392318-2392521 | + | 204 |
| 140285  | STM14_2834     | 378451011 | + | 2455277-2455405 | hypothetical protein                            | 2401440-2401568 | + | 129 |
| 140285  | STM14_2854     | 378451030 | - | 2475407-2475529 | hypothetical protein                            | 2421571-2421693 | - | 123 |
| 140285  | STM14_2855     | 378451031 | + | 2475538-2475645 | hypothetical protein                            | 2421702-2421809 | + | 108 |
| 140285  | STM14_2856     | 378451032 | + | 2475654-2475836 | hypothetical protein                            | 2421818-2422000 | + | 183 |
| 140285  | STM14_2870     | 378451046 | + | 2491031-2491153 | hypothetical protein                            | 2437195-2437317 | + | 123 |
| 140285  | STM14_2871     | 378451047 | - | 2491241-2491357 | hypothetical protein                            | 2437405-2437521 | - | 117 |
| 140285  | STM14_2880     | 378451056 | - | 2499179-2499430 | hypothetical protein                            | 2445343-2445594 | - | 252 |
| 140285  | STM14_2881     | 378451057 | + | 2499320-2499454 | hypothetical protein                            | 2445484-2445618 | + | 135 |
| 140285  | STM14_2890     | 378451066 | + | 2508681-2508854 | hypothetical protein                            | 2454845-2455018 | + | 174 |
| 140285  | STM14_2921     | 378451097 | + | 2537322-2537438 | hypothetical protein                            | 2483486-2483602 | + | 117 |
| 140285  | STM14_2940     | 378451116 | + | 2553683-2553823 | hypothetical protein                            | 2499847-2499987 | + | 141 |
| 140285  | STM14_2941     | 378451117 | - | 2553820-2553948 | hypothetical protein                            | 2499984-2500112 | - | 129 |
| T000240 | STMDT12_C24200 | 378984961 | + | 2507125-2507337 | hypothetical protein                            | 2509298-2509510 | + | 213 |
| 140285  | STM14_2959     | 378451134 | + | 2573587-2573775 | hypothetical protein                            | 2519751-2519939 | + | 189 |
| 140285  | STM14_2986     | 378451155 | + | 2595762-2595923 | hypothetical protein                            | 2541926-2542087 | + | 162 |
| 140285  | STM14_2988     | 378451157 | + | 2595966-2596094 | hypothetical protein                            | 2542130-2542258 | + | 129 |
| 140285  | STM14_3032     | 378451201 | + | 2633812-2634012 | hypothetical protein                            | 2579976-2580176 | + | 201 |
| 140285  | STM14_3036     | 378451205 | - | 2637342-2637476 | hypothetical protein                            | 2583506-2583640 | - | 135 |
| 140285  | STM14_3043     | 378451212 | - | 2645096-2645227 | hypothetical protein                            | 2591260-2591391 | - | 132 |
| 140285  | STM14_3063     | 378451232 | - | 2664349-2664552 | hypothetical protein                            | 2610513-2610716 | - | 204 |
| 140285  | STM14_3069     | 378451238 | - | 2672447-2672584 | putative cytoplasmic protein                    | 2618611-2618748 | - | 138 |
| 140285  | STM14_3072     | 378451241 | - | 2673033-2673269 | putative inner membrane protein                 | 2619197-2619433 | - | 237 |
| T000240 | STMDT12_C25240 | 378985065 | + | 2617191-2617382 | putative cytoplasmic protein                    | 2619483-2619674 | + | 192 |
| 140285  | STM14_3079     | 378451248 | + | 2685671-2685784 | hypothetical protein                            | 2631835-2631948 | + | 114 |
| 140285  | STM14_3080     | 378451249 | + | 2685675-2685857 | hypothetical protein                            | 2631839-2632021 | + | 183 |
| 140285  | STM14_3081     | 378451250 | - | 2685854-2685967 | hypothetical protein                            | 2632018-2632131 | - | 114 |
| 140285  | STM14_3086     | 378451254 | + | 2702354-2702470 | hypothetical protein                            | 2648518-2648634 | + | 117 |
| 140285  | STM14_3087     | 378451255 | - | 2702529-2702684 | hypothetical protein                            | 2648693-2648848 | - | 156 |
| 140285  | STM14_3090     | 378451258 | + | 2704480-2704581 | hypothetical protein                            | 2650644-2650745 | + | 102 |
| 140285  | STM14_3096     | 378451264 | - | 2710094-2710216 | type IV pilus biogenesis/stability protein PilW | 2656258-2656380 | - | 123 |
| 140285  | STM14_3099     | 378451267 | + | 2712052-2712147 | hypothetical protein                            | 2658216-2658311 | + | 96  |
| 140285  | STM14_3107     | 378451275 | - | 2725280-2725504 | hypothetical protein                            | 2671444-2671668 | - | 225 |
| 140285  | STM14_3109     | 378451277 | - | 2726253-2726387 | hypothetical protein                            | 2672417-2672551 | - | 135 |
| 140285  | STM14_3119     | 378451287 | + | 2734356-2734475 | hypothetical protein                            | 2680520-2680639 | + | 120 |
| 140285  | STM14_3122     | 378451290 | + | 2735856-2735978 | hypothetical protein                            | 2682020-2682142 | + | 123 |
| 140285  | STM14_3123     | 378451291 | - | 2735883-2735993 | hypothetical protein                            | 2682047-2682157 | - | 111 |
| 140285  | STM14_3144     | 378451312 | + | 2759420-2759548 | hypothetical protein                            | 2705584-2705712 | + | 129 |
| SL1344  | SL1344_2548    | 378700486 | - | 2730253-2730318 | bacteriophage protein                           | 2730253-2730318 | - | 66  |
| D23580  | STMMW_26031    | 378446002 | - | 2757050-2757262 | putative prophage protein                       | 2730381-2730593 | - | 213 |
| 140285  | STM14_1473     | 378449695 | - | 1321447-1322058 | hypothetical protein                            | 2739236-2739841 | + | 606 |
| 140285  | STM14_3197     | 378451364 | + | 2811771-2811908 | hypothetical protein                            | 2757924-2758061 | + | 138 |
| 140285  | STM14_3202     | 378451368 | - | 2814160-2814285 | hypothetical protein                            | 2760313-2760438 | - | 126 |
| 140285  | STM14_1440     | 378449663 | + | 1298794-1299042 | putative bacteriophage protein                  | 2762857-2763105 | - | 249 |
| 140285  | STM14_3209     | 378451375 | + | 2816906-2817040 | prophage DinI                                   | 2763059-2763193 | + | 135 |
| 140285  | STM14_1438     | 378449661 | + | 1297994-1298185 | hypothetical protein                            | 2763714-2763905 | - | 192 |
| 140285  | STM14_1430     | 410023172 | + | 1293547-1293774 | hypothetical protein                            | 2768125-2768352 | - | 228 |
| 140285  | STM14_1427     | 378449650 | + | 1291515-1291721 | hypothetical protein                            | 2770178-2770384 | - | 207 |
| 140285  | STM14_3229     | 378451395 | + | 2830868-2831005 | hypothetical protein                            | 2777447-2777584 | + | 138 |





|        |                |           |   |                 |                                 |                 |   |     |
|--------|----------------|-----------|---|-----------------|---------------------------------|-----------------|---|-----|
| 14028S | STM14_3693     | 378451836 | + | 3237457-3237624 | hypothetical protein            | 3239038-3239205 | + | 168 |
| 14028S | STM14_3700     | 378451843 | + | 3243685-3243795 | hypothetical protein            | 3245266-3245376 | + | 111 |
| 14028S | STM14_3702     | 378451845 | + | 3244595-3244732 | hypothetical protein            | 3246176-3246313 | + | 138 |
| 14028S | STM14_3704     | 378451847 | + | 3245634-3245885 | hypothetical protein            | 3247215-3247466 | + | 252 |
| 14028S | STM14_3711     | 378451854 | + | 3252233-3252433 | hypothetical protein            | 3253814-3254014 | + | 201 |
| 14028S | STM14_3718     | 378451861 | + | 3257540-3257698 | hypothetical protein            | 3259121-3259279 | + | 159 |
| 14028S | STM14_3722     | 378451865 | + | 3260720-3260824 | hypothetical protein            | 3262301-3262405 | + | 105 |
| UK1    | STMUK_3076     | 378990408 | + | 3217903-3218067 | putative cytoplasmic protein    | 3271879-3272043 | + | 165 |
| 14028S | STM14_3734     | 378451876 | - | 3271996-3272121 | hypothetical protein            | 3273577-3273702 | - | 126 |
| 14028S | STM14_3751     | 378451893 | - | 3285668-3285820 | hypothetical protein            | 3287249-3287401 | - | 153 |
| 14028S | STM14_3757     | 378451899 | - | 3289138-3289263 | hypothetical protein            | 3290719-3290844 | - | 126 |
| 14028S | STM14_3759     | 378451901 | - | 3290425-3290550 | hypothetical protein            | 3292006-3292131 | - | 126 |
| 14028S | STM14_3762     | 378451903 | - | 3293235-3293459 | hypothetical protein            | 3295685-3295909 | - | 225 |
| 14028S | STM14_3773     | 378451913 | - | 3301831-3301965 | hypothetical protein            | 3304281-3304415 | - | 135 |
| 14028S | STM14_3774     | 378451914 | + | 3302110-3302214 | hypothetical protein            | 3304560-3304664 | + | 105 |
| 14028S | STM14_3778     | 378451918 | - | 3305157-3305300 | hypothetical protein            | 3307607-3307750 | - | 144 |
| 14028S | STM14_3779     | 378451919 | - | 3305240-3305395 | putative cytoplasmic protein    | 3307690-3307845 | - | 156 |
| 14028S | STM14_3783     | 378451923 | + | 3308724-3308864 | hypothetical protein            | 3311174-3311314 | + | 141 |
| T00240 | STMDT12_C31860 | 378985726 | + | 3314720-3314875 | hypothetical protein            | 3312159-3312314 | + | 156 |
| 14028S | STM14_3789     | 378451928 | + | 3312290-3312427 | hypothetical protein            | 3314742-3314879 | + | 138 |
| 14028S | STM14_3790     | 378451929 | + | 3312496-3312606 | hypothetical protein            | 3314948-3315058 | - | 111 |
| 14028S | STM14_3792     | 378451931 | + | 3314050-3314181 | hypothetical protein            | 3316502-3316633 | + | 132 |
| 14028S | STM14_3793     | 378451932 | - | 3314188-3314334 | hypothetical protein            | 3316640-3316786 | - | 147 |
| 14028S | STM14_3794     | 378451933 | + | 3314216-3314410 | hypothetical protein            | 3316668-3316862 | + | 195 |
| 14028S | STM14_3798     | 378451937 | + | 3318584-3318703 | hypothetical protein            | 3321036-3321155 | + | 120 |
| 14028S | STM14_3800     | 378451939 | + | 3319990-3320106 | hypothetical protein            | 3322442-3322558 | - | 117 |
| 14028S | STM14_3801     | 378451940 | + | 3320290-3320487 | hypothetical protein            | 3322742-3322939 | + | 198 |
| 14028S | STM14_3803     | 378451942 | - | 3322464-3322571 | hypothetical protein            | 3324916-3325203 | - | 108 |
| 14028S | STM14_3815     | 378451954 | + | 3332051-3332179 | hypothetical protein            | 3334503-3334631 | + | 129 |
| 14028S | STM14_0363     | 378448623 | - | 352120-352227   | hypothetical protein            | 3337626-3337733 | + | 108 |
| 14028S | STM14_3830     | 378451969 | + | 3342234-3342434 | hypothetical protein            | 3344686-3344886 | + | 201 |
| 14028S | STM14_3833     | 378451972 | - | 3344492-3344629 | hypothetical protein            | 3346944-3347081 | - | 138 |
| 14028S | STM14_3834     | 378451973 | + | 3344530-3344640 | hypothetical protein            | 3346982-3347092 | + | 111 |
| 14028S | STM14_3837     | 378451976 | + | 3346625-3346789 | hypothetical protein            | 3349077-3349241 | + | 165 |
| 14028S | STM14_3840     | 378451979 | - | 3349441-3349545 | hypothetical protein            | 3351893-3351997 | - | 105 |
| 14028S | STM14_3851     | 378451990 | + | 3361049-3361165 | hypothetical protein            | 3363501-3363617 | + | 117 |
| 14028S | STM14_3860     | 378451999 | + | 3368291-3368398 | hypothetical protein            | 3370743-3370850 | + | 108 |
| T00240 | STMDT12_C32520 | 378985792 | + | 3381047-3381148 | hypothetical protein            | 3378488-3378589 | + | 102 |
| 14028S | STM14_3872     | 378452011 | - | 3377873-3378022 | hypothetical protein            | 3380325-3380474 | - | 150 |
| 14028S | STM14_3875     | 378452014 | + | 3380454-3380651 | hypothetical protein            | 3382906-3383103 | + | 198 |
| 14028S | STM14_3884     | 378452023 | + | 3390891-3391163 | hypothetical protein            | 3393343-3393615 | + | 273 |
| 14028S | STM14_3895     | 378452033 | + | 3402540-3402695 | hypothetical protein            | 3404992-3405147 | + | 156 |
| 14028S | STM14_3901     | 378452039 | - | 3408358-3408459 | hypothetical protein            | 3410810-3410911 | - | 102 |
| 14028S | STM14_3904     | 378452042 | + | 3410298-3410435 | hypothetical protein            | 3412750-3412887 | + | 138 |
| 14028S | STM14_3907     | 378452045 | - | 3412994-3413194 | hypothetical protein            | 3415446-3415646 | - | 201 |
| D23580 | STMMW_32461    | 378446633 | + | 3437229-3437615 | hypothetical protein            | 3435510-3435896 | + | 387 |
| 14028S | STM14_3932     | 378452069 | - | 3436508-3436648 | hypothetical protein            | 3438960-3439100 | - | 141 |
| 14028S | STM14_3933     | 378452070 | + | 3436575-3436694 | hypothetical protein            | 3439027-3439146 | + | 120 |
| 14028S | STM14_3934     | 378452071 | + | 3436648-3436776 | hypothetical protein            | 3439100-3439228 | + | 129 |
| 14028S | STM14_3938     | 378452075 | + | 3440518-3440661 | hypothetical protein            | 3442970-3443113 | + | 144 |
| 14028S | STM14_3965     | 378452100 | - | 3464611-3464718 | hypothetical protein            | 3472132-3472239 | - | 108 |
| 14028S | STM14_3985     | 378452118 | - | 3482355-3482456 | hypothetical protein            | 3489876-3489977 | - | 102 |
| 14028S | STM14_3996     | 378452128 | - | 3490436-3490546 | hypothetical protein            | 3497957-3498067 | - | 111 |
| 14028S | STM14_4018     | 378452150 | - | 3508092-3508241 | hypothetical protein            | 3515613-3515762 | - | 150 |
| 14028S | STM14_4019     | 378452151 | - | 3508281-3508475 | hypothetical protein            | 3515802-3515996 | - | 195 |
| 14028S | STM14_4023     | 378452155 | + | 3515633-3515794 | hypothetical protein            | 3523154-3523315 | + | 162 |
| 14028S | STM14_4034     | 378452166 | + | 3525086-3525205 | hypothetical protein            | 3532607-3532726 | + | 120 |
| 14028S | STM14_4051     | 378452183 | - | 3540466-3540597 | malate dehydrogenase            | 3547987-3548118 | - | 132 |
| 14028S | STM14_4053     | 378452185 | + | 3541795-3541923 | hypothetical protein            | 3549316-3549444 | + | 129 |
| T00240 | STMDT12_C34190 | 378985959 | + | 3551875-3551970 | hypothetical protein            | 3550031-3550126 | + | 96  |
| 14028S | STM14_4074     | 378452206 | - | 3563669-3563851 | hypothetical protein            | 3571190-3571372 | - | 183 |
| 14028S | STM14_4075     | 378452207 | + | 3563867-3563971 | hypothetical protein            | 3571388-3571492 | + | 105 |
| 14028S | STM14_4081     | 378452213 | - | 3568595-3568738 | hypothetical protein            | 3576116-3576259 | - | 144 |
| 14028S | STM14_4089     | 378452221 | + | 3574662-3574820 | hypothetical protein            | 3582183-3582341 | + | 159 |
| 14028S | STM14_4093     | 378452225 | + | 3579746-3579922 | hypothetical protein            | 3587267-3587443 | + | 177 |
| 14028S | STM14_4094     | 378452226 | - | 3580182-3580316 | hypothetical protein            | 3587703-3587837 | - | 135 |
| 14028S | STM14_4095     | 378452227 | + | 3580370-3580480 | hypothetical protein            | 3587891-3588001 | + | 111 |
| T00240 | STMDT12_C34520 | 378985992 | - | 3595480-3595632 | hypothetical protein            | 3593698-3593850 | - | 153 |
| 14028S | STM14_4148     | 378452275 | - | 3611988-3612179 | elongation factor Tu            | 3619612-3619803 | - | 192 |
| 14028S | STM14_4163     | 378452290 | + | 3623551-3623655 | hypothetical protein            | 3631175-3631279 | + | 105 |
| 14028S | STM14_4167     | 378452293 | + | 3626355-3626480 | hypothetical protein            | 3633979-3634104 | + | 126 |
| 14028S | STM14_4172     | 378452298 | + | 3629162-3629344 | hypothetical protein            | 3636786-3636968 | + | 183 |
| 14028S | STM14_4180     | 378452306 | + | 3635785-3635937 | hypothetical protein            | 3643409-3643561 | + | 153 |
| 14028S | STM14_4182     | 378452308 | - | 3637245-3637421 | hypothetical protein            | 3644869-3645045 | - | 177 |
| 14028S | STM14_4185     | 378452311 | - | 3640241-3640396 | hypothetical protein            | 3647865-3648020 | - | 156 |
| 14028S | STM14_4192     | 378452318 | - | 3649991-3650131 | hypothetical protein            | 3657615-3657755 | - | 141 |
| 14028S | STM14_4207     | 378452333 | - | 3663870-3663983 | hypothetical protein            | 3671494-3671607 | - | 114 |
| 14028S | STM14_4213     | 378452339 | - | 3670273-3670407 | hypothetical protein            | 3677897-3678031 | - | 135 |
| 14028S | STM14_4214     | 378452340 | + | 3670342-3670449 | hypothetical protein            | 3677966-3678073 | + | 108 |
| 14028S | STM14_4220     | 378452346 | + | 3677538-3677768 | hypothetical protein            | 3685162-3685392 | + | 231 |
| 14028S | STM14_4229     | 378452355 | - | 3684140-3684289 | hypothetical protein            | 3691764-3691913 | - | 150 |
| 14028S | STM14_4233     | 378452359 | - | 3690393-3690500 | hypothetical protein            | 3698017-3698124 | - | 108 |
| 14028S | STM14_4240     | 378452366 | - | 3698369-3698491 | hypothetical protein            | 3705993-3706115 | - | 123 |
| 14028S | STM14_4243     | 378452369 | - | 3700901-3701017 | hypothetical protein            | 3708525-3708641 | - | 117 |
| 14028S | STM14_4259     | 378452384 | - | 3722125-3722298 | hypothetical protein            | 3729749-3729922 | - | 174 |
| 14028S | STM14_4261     | 378452386 | + | 3723463-3723627 | hypothetical protein            | 3731087-3731251 | + | 165 |
| 14028S | STM14_4263     | 378452387 | + | 3723698-3723940 | putative inner membrane protein | 3731322-3731564 | + | 243 |
| 14028S | STM14_4269     | 378452393 | + | 3728906-3729031 | hypothetical protein            | 3736530-3736655 | + | 126 |
| 14028S | STM14_4270     | 378452394 | + | 3729191-3729319 | hypothetical protein            | 3736815-3736943 | + | 129 |
| 14028S | STM14_4277     | 378452401 | + | 3735927-3736031 | hypothetical protein            | 3743552-3743656 | + | 105 |
| 14028S | STM14_4291     | 378452415 | - | 3747318-3747434 | hypothetical protein            | 3754943-3755059 | - | 117 |
| 14028S | STM14_4296     | 378452420 | + | 3750462-3750605 | hypothetical protein            | 3758087-3758230 | + | 144 |
| 14028S | STM14_4325     | 378452449 | + | 3781138-3781305 | hypothetical protein            | 3788763-3788930 | + | 168 |

|         |              |           |   |                 |                                      |                 |   |     |
|---------|--------------|-----------|---|-----------------|--------------------------------------|-----------------|---|-----|
| 140285  | STM14_4333   | 378452457 | + | 3789092-3789217 | hypothetical protein                 | 3796717-3796842 | + | 126 |
| 140285  | STM14_4336   | 378452460 | - | 3792675-3792815 | hypothetical protein                 | 3800300-3800440 | - | 141 |
| 140285  | STM14_4339   | 378452463 | - | 3794036-3794179 | hypothetical protein                 | 3801661-3801804 | - | 144 |
| 140285  | STM14_4340   | 378452464 | + | 3794140-3794265 | hypothetical protein                 | 3801765-3801890 | + | 126 |
| 140285  | STM14_4343   | 378452467 | + | 3796527-3796667 | hypothetical protein                 | 3804152-3804292 | + | 141 |
| 140285  | STM14_4347   | 378452471 | - | 3801111-3801227 | hypothetical protein                 | 3808736-3808852 | - | 117 |
| 140285  | STM14_4350   | 378452474 | + | 3803739-3803876 | hypothetical protein                 | 3811364-3811501 | + | 138 |
| 140285  | STM14_4352   | 378452476 | - | 3805315-3805461 | hypothetical protein                 | 3812940-3813086 | - | 147 |
| 140285  | STM14_4354   | 378452478 | - | 3807400-3807591 | hypothetical protein                 | 3815025-3815216 | - | 192 |
| 140285  | STM14_4361   | 378452485 | + | 3818231-3818344 | hypothetical protein                 | 3825856-3825969 | + | 114 |
| 140285  | STM14_4366   | 378452489 | - | 3822083-3822277 | hypothetical protein                 | 3829708-3829902 | - | 195 |
| 140285  | STM14_4374   | 378452497 | - | 3827982-3828101 | hypothetical protein                 | 3835607-3835726 | - | 120 |
| 140285  | STM14_4378   | 378452501 | - | 3832781-3832954 | hypothetical protein                 | 3840406-3840579 | - | 174 |
| 140285  | STM14_4379   | 378452502 | + | 3832815-3832976 | hypothetical protein                 | 3840440-3840601 | + | 162 |
| 140285  | STM14_4388   | 378452509 | + | 3842019-3842180 | hypothetical protein                 | 3849644-3849805 | + | 162 |
| 140285  | STM14_4393   | 378452514 | + | 3846344-3846445 | hypothetical protein                 | 3853969-3854070 | + | 102 |
| 140285  | STM14_4395   | 378452516 | - | 3847245-3847379 | hypothetical protein                 | 3854870-3855004 | - | 135 |
| 140285  | STM14_4403   | 378452524 | - | 3852193-3852324 | hypothetical protein                 | 3859818-3859949 | - | 132 |
| 140285  | STM14_4408   | 378452528 | + | 3856473-3856610 | hypothetical protein                 | 3864098-3864235 | + | 138 |
| 140285  | STM14_4410   | 378452530 | - | 3856798-3857019 | hypothetical protein                 | 3864423-3864644 | - | 222 |
| 140285  | STM14_4415   | 378452535 | + | 3861460-3861693 | hypothetical protein                 | 3869085-3869318 | + | 234 |
| 140285  | STM14_4416   | 378452536 | - | 3861562-3861738 | hypothetical protein                 | 3869187-3869363 | - | 177 |
| 140285  | STM14_4419   | 378452539 | + | 3863890-3864222 | hypothetical protein                 | 3871515-3871847 | + | 333 |
| 140285  | STM14_4424   | 378452544 | - | 3869165-3869311 | hypothetical protein                 | 3876790-3876936 | - | 147 |
| 140285  | STM14_4437   | 378452557 | + | 3881551-3881694 | hypothetical protein                 | 3889176-3889319 | + | 144 |
| 140285  | STM14_4448   | 378452568 | + | 3893735-3893932 | hypothetical protein                 | 3901360-3901557 | + | 198 |
| 140285  | STM14_4456   | 378452576 | + | 3904878-3905129 | hypothetical protein                 | 3912502-3912753 | + | 252 |
| 140285  | STM14_4485   | 378452605 | - | 3932731-3932850 | hypothetical protein                 | 3940354-3940473 | - | 120 |
| 140285  | STM14_4501   | 378452621 | + | 3943928-3944110 | hypothetical protein                 | 3951551-3951733 | + | 183 |
| 140285  | STM14_4504   | 378452624 | + | 3946552-3946725 | hypothetical protein                 | 3954175-3954348 | + | 174 |
| 140285  | STM14_4512   | 378452632 | - | 3954806-3954916 | hypothetical protein                 | 3962429-3962539 | - | 111 |
| 140285  | STM14_4520   | 378452639 | + | 3963213-3963356 | hypothetical protein                 | 3970836-3970979 | + | 144 |
| 140285  | STM14_4521   | 378452640 | - | 3963387-3963497 | hypothetical protein                 | 3971010-3971120 | - | 111 |
| D23580  | STM14_37441  | 378447121 | - | 3975758-3975931 | iXac3 transposase                    | 3974197-3974370 | - | 174 |
| D23580  | STM14_37491  | 378447126 | - | 3981984-3982097 | putative product                     | 3980423-3980536 | - | 114 |
| 140285  | STM14_3040   | 378451209 | + | 2640806-2640913 | hypothetical protein                 | 3981875-3981982 | - | 108 |
| 140285  | STM14_4535   | 378452652 | + | 3974935-3975075 | hypothetical protein                 | 3982558-3982698 | + | 141 |
| T000240 | STM14_C38190 | 378986359 | - | 3984324-3984416 | hypothetical protein                 | 3982743-3982835 | - | 93  |
| 140285  | STM14_4537   | 378452654 | + | 3978059-3978172 | hypothetical protein                 | 3985682-3985795 | + | 114 |
| 140285  | STM14_4539   | 378452656 | + | 3979055-3979171 | hypothetical protein                 | 3986678-3986794 | + | 117 |
| 140285  | STM14_4540   | 378452657 | - | 3979172-3979297 | hypothetical protein                 | 3986795-3986920 | - | 126 |
| 140285  | STM14_4549   | 378452666 | + | 3986024-3986146 | hypothetical protein                 | 3993647-3993769 | + | 123 |
| 140285  | STM14_4551   | 378452668 | - | 3989051-3989164 | hypothetical protein                 | 3996674-3996787 | - | 114 |
| 140285  | STM14_4553   | 378452670 | + | 3989514-3989657 | hypothetical protein                 | 3997137-3997280 | + | 144 |
| 140285  | STM14_4565   | 378452682 | - | 3999123-3999230 | hypothetical protein                 | 4006745-4006852 | - | 108 |
| 140285  | STM14_4578   | 378452695 | + | 4011296-4011472 | hypothetical protein                 | 4018917-4019093 | + | 177 |
| 140285  | STM14_4580   | 378452697 | + | 4011519-4011680 | hypothetical protein                 | 4019140-4019301 | + | 162 |
| 140285  | STM14_4581   | 378452698 | - | 4011613-4011768 | hypothetical protein                 | 4019234-4019389 | - | 156 |
| 140285  | STM14_4582   | 378452699 | + | 4011777-4011950 | hypothetical protein                 | 4019398-4019571 | + | 174 |
| D23580  | STM14_37861  | 378447163 | + | 4021208-4021303 | hypothetical protein                 | 4019646-4019741 | + | 96  |
| D23580  | STM14_37871  | 378447164 | + | 4021319-4021408 | putative LexA-regulated protein TisB | 4019757-4019846 | + | 90  |
| 140285  | STM14_4589   | 378452704 | - | 4016572-4016697 | hypothetical protein                 | 4024194-4024319 | - | 126 |
| 140285  | STM14_4595   | 378452710 | + | 4020774-4020887 | hypothetical protein                 | 4028396-4028509 | + | 114 |
| 140285  | STM14_4598   | 378452712 | + | 4022921-4023073 | hypothetical protein                 | 4030543-4030695 | + | 153 |
| 140285  | STM14_4601   | 378452715 | + | 4024130-4024306 | hypothetical protein                 | 4031752-4031928 | + | 177 |
| 140285  | STM14_4630   | 378452743 | + | 4056093-4056239 | hypothetical protein                 | 4063715-4063861 | + | 147 |
| 140285  | STM14_4633   | 378452746 | + | 4059079-4059237 | hypothetical protein                 | 4066701-4066859 | + | 159 |
| T000240 | STM14_C40060 | 378986546 | - | 4156200-4156427 | hypothetical protein                 | 4072400-4072627 | - | 228 |
| 140285  | STM14_4658   | 378452770 | + | 4086316-4086504 | hypothetical protein                 | 4093935-4094123 | + | 189 |
| 140285  | STM14_4669   | 378452781 | - | 4094364-4094507 | hypothetical protein                 | 4101983-4102126 | - | 144 |
| 140285  | STM14_4696   | 378452801 | + | 4122161-4122346 | hypothetical protein                 | 4130016-4130201 | + | 186 |
| 140285  | STM14_4733   | 378452833 | + | 4155257-4155382 | hypothetical protein                 | 4163112-4163237 | + | 126 |
| 140285  | STM14_4738   | 378452838 | - | 4159908-4160012 | hypothetical protein                 | 4167763-4167867 | - | 105 |
| 140285  | STM14_4740   | 378452840 | + | 4162570-4162710 | hypothetical protein                 | 4170425-4170565 | + | 141 |
| 140285  | STM14_4753   | 378452852 | - | 4171444-4171629 | hypothetical protein                 | 4179299-4179484 | - | 186 |
| 140285  | STM14_4759   | 378452858 | - | 4175211-4175348 | hypothetical protein                 | 4183066-4183203 | - | 138 |
| 140285  | STM14_4768   | 378452867 | + | 4183187-4183360 | hypothetical protein                 | 4191042-4191215 | + | 174 |
| 140285  | STM14_4770   | 378452869 | - | 4185870-4186004 | hypothetical protein                 | 4193725-4193859 | - | 135 |
| 140285  | STM14_4771   | 378452870 | + | 4185906-4186052 | hypothetical protein                 | 4193761-4193907 | + | 147 |
| 140285  | STM14_4784   | 378452883 | + | 4197098-4197223 | hypothetical protein                 | 4204953-4205078 | + | 126 |
| 140285  | STM14_4800   | 378452894 | - | 4215049-4215231 | hypothetical protein                 | 4222904-4223086 | - | 183 |
| 140285  | STM14_4801   | 378452895 | + | 4215077-4215433 | hypothetical protein                 | 4222932-4223288 | + | 357 |
| 140285  | STM14_4808   | 378452902 | - | 4219525-4219656 | hypothetical protein                 | 4227380-4227511 | - | 132 |
| 140285  | STM14_4811   | 378452904 | + | 4222708-4222851 | hypothetical protein                 | 4230563-4230706 | + | 144 |
| 140285  | STM14_4816   | 378452909 | - | 4226121-4226246 | hypothetical protein                 | 4233976-4234101 | - | 126 |
| 140285  | STM14_4819   | 378452912 | - | 4228860-4229039 | hypothetical protein                 | 4236715-4236894 | - | 180 |
| 140285  | STM14_4821   | 378452914 | - | 4230571-4230990 | putative cytoplasmic protein         | 4238426-4238845 | - | 420 |
| 140285  | STM14_4837   | 378452930 | - | 4248232-4248351 | hypothetical protein                 | 4256087-4256206 | - | 120 |
| 140285  | STM14_4854   | 378452947 | - | 4262409-4262564 | hypothetical protein                 | 4270264-4270419 | - | 156 |
| 140285  | STM14_4856   | 378452949 | + | 4263770-4263904 | hypothetical protein                 | 4271625-4271759 | + | 135 |
| 140285  | STM14_4858   | 378452951 | + | 4265002-4265130 | hypothetical protein                 | 4272857-4272985 | + | 129 |
| 140285  | STM14_4867   | 378452960 | + | 4272347-4272496 | hypothetical protein                 | 4280202-4280351 | + | 150 |
| 140285  | STM14_4868   | 378452961 | - | 4272426-4272560 | hypothetical protein                 | 4280281-4280415 | - | 135 |
| 140285  | STM14_4872   | 378452965 | + | 4275521-4275652 | hypothetical protein                 | 4283376-4283507 | + | 132 |
| 140285  | STM14_4886   | 378452979 | - | 4286951-4287055 | hypothetical protein                 | 4294806-4294910 | - | 105 |
| 140285  | STM14_4898   | 378452991 | - | 4296957-4297091 | hypothetical protein                 | 4304811-4304945 | - | 135 |
| 140285  | STM14_4909   | 378453002 | - | 4305795-4305962 | hypothetical protein                 | 4313649-4313816 | - | 168 |
| 140285  | STM14_4914   | 378453007 | + | 4310547-4310666 | hypothetical protein                 | 4318401-4318520 | + | 120 |
| 140285  | STM14_4934   | 378453027 | - | 4332008-4332127 | hypothetical protein                 | 4339862-4339981 | - | 120 |
| 140285  | STM14_4938   | 378453031 | + | 4336017-4336178 | hypothetical protein                 | 4343871-4344032 | + | 162 |
| 140285  | STM14_4943   | 378453035 | - | 4340772-4340927 | hypothetical protein                 | 4348626-4348781 | - | 156 |
| 140285  | STM14_4950   | 378453042 | + | 4346732-4346872 | hypothetical protein                 | 4354586-4354726 | + | 141 |
| 140285  | STM14_4951   | 378453043 | + | 4346784-4346900 | hypothetical protein                 | 4354638-4354754 | + | 117 |

|         |                |           |   |                 |                                         |                 |   |     |
|---------|----------------|-----------|---|-----------------|-----------------------------------------|-----------------|---|-----|
| 14028S  | STM14_4953     | 378453045 | + | 4348703-4348810 | hypothetical protein                    | 4356557-4356664 | + | 108 |
| 14028S  | STM14_4961     | 378453053 | - | 4358974-4359162 | hypothetical protein                    | 4366828-4367016 | - | 189 |
| 14028S  | STM14_0296     | 378448563 | + | 291760-291876   | hypothetical protein                    | 4374452-4374568 | + | 117 |
| 14028S  | STM14_4983     | 378453065 | + | 4375382-4375510 | hypothetical protein                    | 4383133-4383261 | + | 129 |
| 14028S  | STM14_4995     | 378453077 | + | 4388644-4388847 | hypothetical protein                    | 4396395-4396598 | + | 204 |
| 14028S  | STM14_4997     | 378453079 | + | 4389931-4390140 | hypothetical protein                    | 4397682-4397891 | + | 210 |
| 14028S  | STM14_5018     | 378453099 | + | 4407683-4407805 | hypothetical protein                    | 4415434-4415556 | + | 123 |
| 14028S  | STM14_5019     | 378453100 | - | 4407796-4407918 | hypothetical protein                    | 4415547-4415669 | - | 123 |
| 14028S  | STM14_5020     | 378453101 | + | 4407851-4407991 | hypothetical protein                    | 4415602-4415742 | + | 141 |
| 14028S  | STM14_5025     | 378453102 | - | 4413499-4413630 | hypothetical protein                    | 4421250-4421381 | - | 132 |
| 14028S  | STM14_5057     | 378453133 | - | 4441014-4441139 | hypothetical protein                    | 4448765-4448890 | - | 126 |
| 14028S  | STM14_5072     | 378453147 | + | 4451435-4451575 | hypothetical protein                    | 4459186-4459326 | + | 141 |
| 14028S  | STM14_5083     | 378453158 | - | 4462681-4462857 | hypothetical protein                    | 4470432-4470608 | - | 177 |
| 14028S  | STM14_5084     | 378453159 | + | 4462737-4462877 | hypothetical protein                    | 4470488-4470628 | + | 141 |
| 14028S  | STM14_5088     | 378453163 | + | 4466972-4467136 | hypothetical protein                    | 4474723-4474887 | + | 165 |
| T000240 | STMDT12_C43680 | 378986908 | + | 4559620-4559715 | hypothetical protein                    | 4475824-4475919 | + | 96  |
| 14028S  | STM14_5101     | 378453176 | + | 4478537-4478704 | hypothetical protein                    | 4486288-4486455 | + | 168 |
| 14028S  | STM14_5115     | 378453190 | - | 4490374-4490565 | hypothetical protein                    | 4498125-4498316 | - | 192 |
| 14028S  | STM14_5116     | 378453191 | + | 4490568-4490723 | hypothetical protein                    | 4498319-4498474 | + | 156 |
| 14028S  | STM14_5124     | 378453199 | + | 4515420-4515557 | hypothetical protein                    | 4523171-4523308 | + | 138 |
| 14028S  | STM14_5125     | 378453200 | - | 4515741-4515845 | hypothetical protein                    | 4523492-4523596 | - | 105 |
| 14028S  | STM14_5129     | 378453204 | - | 4518503-4518631 | hypothetical protein                    | 4526254-4526382 | - | 129 |
| 14028S  | STM14_5131     | 378453206 | - | 4519322-4519456 | hypothetical protein                    | 4527073-4527207 | - | 135 |
| 14028S  | STM14_5134     | 378453209 | - | 4521030-4521188 | hypothetical protein                    | 4528781-4528939 | - | 159 |
| 14028S  | STM14_5149     | 378453224 | - | 4536353-4536481 | hypothetical protein                    | 4544104-4544232 | - | 129 |
| 14028S  | STM14_5150     | 378453225 | + | 4536377-4536649 | hypothetical protein                    | 4544128-4544400 | + | 273 |
| 14028S  | STM14_5152     | 378453227 | + | 4537849-4538022 | hypothetical protein                    | 4545600-4545773 | + | 174 |
| 14028S  | STM14_5154     | 378453229 | - | 4538728-4538883 | hypothetical protein                    | 4546479-4546634 | - | 156 |
| 14028S  | STM14_5160     | 378453235 | + | 4544189-4544284 | hypothetical protein                    | 4551940-4552035 | + | 96  |
| 14028S  | STM14_5162     | 378453237 | + | 4546069-4546173 | hypothetical protein                    | 4553820-4553924 | + | 105 |
| 14028S  | STM14_5168     | 378453243 | + | 4552110-4552238 | hypothetical protein                    | 4559861-4559989 | + | 129 |
| 14028S  | STM14_5183     | 378453258 | + | 4571436-4571549 | hypothetical protein                    | 4579187-4579300 | + | 114 |
| 14028S  | STM14_5189     | 378453264 | + | 4574725-4574850 | hypothetical protein                    | 4582476-4582601 | + | 126 |
| SL1344  | SL1344_4256    | 378702162 | - | 4584964-4585098 | hypothetical protein                    | 4584965-4585099 | - | 135 |
| 14028S  | STM14_5194     | 378453269 | - | 4578381-4578758 | ethyl tert-butyl ether degradation EthD | 4586132-4586509 | - | 378 |
| 14028S  | STM14_5196     | 378453271 | - | 4579152-4579388 | hypothetical protein                    | 4586903-4587139 | - | 237 |
| 14028S  | STM14_5203     | 378453277 | - | 4585245-4585367 | hypothetical protein                    | 4592996-4593118 | - | 123 |
| 14028S  | STM14_5208     | 378453282 | - | 4589666-4589833 | hypothetical protein                    | 4597417-4597584 | - | 168 |
| 14028S  | STM14_5211     | 378453285 | + | 4591089-4591223 | hypothetical protein                    | 4598840-4598974 | + | 135 |
| 14028S  | STM14_5212     | 378453286 | - | 4591232-4591378 | hypothetical protein                    | 4598983-4599129 | - | 147 |
| 14028S  | STM14_5225     | 378453299 | + | 4599983-4600087 | hypothetical protein                    | 4607734-4607838 | + | 105 |
| 14028S  | STM14_5272     | 378453343 | - | 4642797-4642994 | hypothetical protein                    | 4650548-4650745 | - | 198 |
| 14028S  | STM14_5273     | 378453344 | + | 4642921-4643028 | hypothetical protein                    | 4650672-4650779 | + | 108 |
| 14028S  | STM14_5288     | 378453359 | - | 4654346-4654567 | hypothetical protein                    | 4662097-4662318 | - | 222 |
| 14028S  | STM14_5291     | 378453362 | - | 4655902-4656081 | hypothetical protein                    | 4663653-4663832 | - | 180 |
| 14028S  | STM14_5295     | 378453366 | + | 4658725-4658841 | hypothetical protein                    | 4666476-4666592 | + | 117 |
| 14028S  | STM14_5303     | 378453374 | - | 4669323-4669508 | hypothetical protein                    | 4677075-4677260 | - | 186 |
| 14028S  | STM14_5305     | 378453376 | - | 4670877-4671137 | hypothetical protein                    | 4678629-4678889 | - | 261 |
| 14028S  | STM14_5306     | 378453377 | + | 4671075-4671302 | hypothetical protein                    | 4678827-4679054 | + | 228 |
| 14028S  | STM14_5309     | 378453380 | - | 4673931-4674110 | hypothetical protein                    | 4681683-4681862 | - | 180 |
| 14028S  | STM14_5313     | 378453384 | - | 4678291-4678593 | putative cytoplasmic protein            | 4686043-4686345 | - | 303 |
| 14028S  | STM14_5315     | 378453386 | + | 4679544-4679654 | hypothetical protein                    | 4687295-4687405 | + | 111 |
| 14028S  | STM14_5323     | 378453393 | + | 4689572-4689691 | hypothetical protein                    | 4697323-4697442 | + | 120 |
| 14028S  | STM14_5347     | 378453416 | + | 4711078-4711185 | hypothetical protein                    | 4718829-4718936 | + | 108 |
| UK1     | STMUK_4448     | 378991724 | + | 4665460-4665600 | putative cytoplasmic protein            | 4725606-4725746 | + | 141 |
| 14028S  | STM14_5356     | 378453425 | - | 4718450-4718566 | hypothetical protein                    | 4726201-4726317 | - | 117 |
| T000240 | STMDT12_C45910 | 378987131 | + | 4803005-4803103 | hypothetical protein                    | 4726207-4726305 | + | 99  |
| 14028S  | STM14_5359     | 378453428 | - | 4721103-4721225 | hypothetical protein                    | 4728854-4728976 | - | 123 |
| 14028S  | STM14_5362     | 378453431 | + | 4723479-4723670 | hypothetical protein                    | 4731230-4731421 | + | 192 |
| T000240 | STMDT12_C46080 | 378987148 | + | 4822036-4822131 | hypothetical protein                    | 4745238-4745333 | + | 96  |
| 14028S  | STM14_5381     | 378453450 | + | 4741810-4741944 | hypothetical protein                    | 4749561-4749695 | + | 135 |
| 14028S  | STM14_5399     | 378453466 | + | 4766523-4766714 | hypothetical protein                    | 4774274-4774465 | + | 192 |
| 14028S  | STM14_5402     | 378453469 | - | 4768806-4769102 | hypothetical protein                    | 4776557-4776853 | - | 297 |
| 14028S  | STM14_5407     | 378453474 | - | 4772241-4772357 | hypothetical protein                    | 4779992-4780108 | - | 117 |
| 14028S  | STM14_5410     | 378453477 | + | 4773638-4773850 | hypothetical protein                    | 4781389-4781601 | + | 213 |
| 14028S  | STM14_5415     | 378453482 | + | 4776954-4777076 | hypothetical protein                    | 4784705-4784827 | + | 123 |
| 14028S  | STM14_5416     | 378453483 | - | 4776976-4777107 | hypothetical protein                    | 4784727-4784858 | - | 132 |
| 14028S  | STM14_5426     | 378453493 | - | 4786173-4786316 | hypothetical protein                    | 4793924-4794067 | - | 144 |
| 14028S  | STM14_5427     | 378453494 | + | 4786386-4786523 | hypothetical protein                    | 4794137-4794274 | + | 138 |
| 14028S  | STM14_5435     | 378453502 | - | 4790281-4790412 | hypothetical protein                    | 4798032-4798163 | - | 132 |
| 14028S  | STM14_5440     | 378453507 | + | 4798305-4798442 | hypothetical protein                    | 4806056-4806193 | + | 138 |
| 14028S  | STM14_5447     | 378453514 | - | 4804689-4804838 | hypothetical protein                    | 4812440-4812589 | - | 150 |
| 14028S  | STM14_5455     | 378453522 | + | 4812431-4812535 | hypothetical protein                    | 4820182-4820286 | + | 105 |
| 14028S  | STM14_5462     | 378453529 | - | 4818419-4818574 | hypothetical protein                    | 4826170-4826325 | - | 156 |
| 14028S  | STM14_5468     | 378453535 | + | 4823006-4823134 | hypothetical protein                    | 4830757-4830885 | + | 129 |
| 14028S  | STM14_5474     | 378453538 | + | 4824998-4825105 | hypothetical protein                    | 4832749-4832856 | + | 108 |
| 14028S  | STM14_5486     | 378453550 | + | 4833992-4834120 | hypothetical protein                    | 4841740-4841868 | + | 129 |
| 14028S  | STM14_5496     | 378453560 | + | 4843995-4844144 | hypothetical protein                    | 4851743-4851892 | + | 150 |

| Genome name | Gene Name   | Reference details |        |               |                                          |               | Gene annotated in 798 |             |  |
|-------------|-------------|-------------------|--------|---------------|------------------------------------------|---------------|-----------------------|-------------|--|
|             |             | GI                | Strand | CDS-region    | Product                                  | Coordinate    | Strand                | Length (bp) |  |
| 14028S      | thrL        | 378448275         | +      | 190-255       | thr operon leader peptide                | 190-255       | +                     | 66          |  |
| 14028S      | STM14_0012  | 378448286         | +      | 11257-11424   | hypothetical protein                     | 11257-11424   | +                     | 168         |  |
| 14028S      | STM14_0015  | 378448289         | +      | 14845-14958   | hypothetical protein                     | 14845-14958   | +                     | 114         |  |
| 14028S      | STM14_0020  | 378448294         | +      | 17613-17741   | hypothetical protein                     | 17613-17741   | -                     | 129         |  |
| 14028S      | STM14_0021  | 378448295         | +      | 17665-17787   | hypothetical protein                     | 17665-17787   | +                     | 123         |  |
| 14028S      | STM14_0024  | 378448298         | +      | 23091-23240   | hypothetical protein                     | 23091-23240   | +                     | 150         |  |
| 14028S      | STM14_0026  | 378448300         | -      | 24094-24198   | hypothetical protein                     | 24094-24198   | -                     | 105         |  |
| 14028S      | STM14_0027  | 378448301         | +      | 24316-24426   | hypothetical protein                     | 24316-24426   | +                     | 111         |  |
| 14028S      | STM14_0040  | 378448314         | +      | 34828-34974   | hypothetical protein                     | 34828-34974   | +                     | 147         |  |
| 14028S      | yaaY        | 378448327         | +      | 52649-52864   | putative cytoplasmic protein             | 52650-52865   | +                     | 216         |  |
| 14028S      | STM14_0057  | 378448331         | +      | 57203-57334   | hypothetical protein                     | 57204-57335   | +                     | 132         |  |
| 14028S      | STM14_0068  | 378448342         | -      | 68513-68671   | hypothetical protein                     | 68513-68671   | -                     | 159         |  |
| 14028S      | STM14_0076  | 378448350         | -      | 74964-75239   | hypothetical protein                     | 74967-75242   | -                     | 276         |  |
| ST474       | STM474_0083 | 379699298         | -      | 92031-92228   | hypothetical protein                     | 92030-92227   | -                     | 198         |  |
| 14028S      | STM14_0097  | 378448371         | -      | 95263-95379   | hypothetical protein                     | 94553-94669   | -                     | 117         |  |
| 14028S      | STM14_0102  | 378448376         | +      | 98738-99019   | hypothetical protein                     | 98028-98309   | +                     | 282         |  |
| 14028S      | STM14_0105  | 378448379         | -      | 101349-101474 | hypothetical protein                     | 100639-100764 | -                     | 126         |  |
| 14028S      | STM14_0113  | 378448387         | -      | 108892-109053 | hypothetical protein                     | 108182-108343 | -                     | 162         |  |
| 14028S      | STM14_0128  | 378448402         | -      | 127427-127546 | putative lipoprotein                     | 126717-126836 | -                     | 120         |  |
| 14028S      | STM14_0130  | 378448404         | -      | 129166-129492 | hypothetical protein                     | 128456-128782 | -                     | 327         |  |
| ST474       | STM474_0114 | 379699329         | +      | 128578-128724 | hypothetical protein                     | 128577-128723 | +                     | 147         |  |
| ST474       | STM474_0115 | 379699330         | +      | 128926-129039 | hypothetical protein                     | 128925-129038 | +                     | 114         |  |
| 14028S      | leuL        | 378448409         | +      | 134538-134624 | leu operon leader peptide                | 133828-133914 | -                     | 87          |  |
| 14028S      | STM14_0136  | 378448410         | -      | 134689-134793 | hypothetical protein                     | 133979-134083 | -                     | 105         |  |
| 14028S      | STM14_0137  | 378448411         | +      | 135067-135210 | hypothetical protein                     | 134357-134500 | +                     | 144         |  |
| 14028S      | STM14_0141  | 378448415         | -      | 138755-138877 | hypothetical protein                     | 138045-138167 | -                     | 123         |  |
| LT2         | STM04630    | 409994397         | -      | 139338-139487 | hypothetical protein                     | 139340-139489 | -                     | 150         |  |
| 14028S      | STM14_0143  | 378448417         | -      | 140204-140338 | hypothetical protein                     | 139494-139628 | -                     | 135         |  |
| 14028S      | STM14_0144  | 378448418         | +      | 140496-140633 | hypothetical protein                     | 139786-139923 | +                     | 138         |  |
| 14028S      | STM14_0165  | 378448438         | +      | 162875-162979 | LysR family transcriptional regulator    | 162165-162269 | +                     | 105         |  |
| 14028S      | STM14_0173  | 378448446         | -      | 168890-169072 | hypothetical protein                     | 168180-168362 | -                     | 183         |  |
| 14028S      | STM14_0179  | 378448452         | -      | 173962-174090 | hypothetical protein                     | 173252-173380 | -                     | 129         |  |
| 14028S      | STM14_0181  | 378448454         | +      | 175672-175794 | hypothetical protein                     | 174962-175084 | +                     | 123         |  |
| 14028S      | STM14_0186  | 378448459         | +      | 183222-183350 | hypothetical protein                     | 182512-182640 | +                     | 129         |  |
| 14028S      | STM14_0210  | 378448482         | -      | 209796-209966 | hypothetical protein                     | 209086-209256 | -                     | 171         |  |
| 14028S      | STM14_0215  | 378448487         | -      | 213058-213171 | hypothetical protein                     | 212348-212461 | -                     | 114         |  |
| 14028S      | STM14_0224  | 378448496         | +      | 221426-221587 | hypothetical protein                     | 220716-220877 | +                     | 162         |  |
| 14028S      | STM14_0225  | 378448497         | -      | 221522-221629 | hypothetical protein                     | 220812-220919 | -                     | 108         |  |
| 14028S      | STM14_0227  | 378448499         | -      | 224289-224429 | hypothetical protein                     | 223579-223719 | -                     | 141         |  |
| 14028S      | STM14_0232  | 378448504         | +      | 230459-230665 | hypothetical protein                     | 229749-229955 | +                     | 207         |  |
| 14028S      | STM14_0233  | 378448505         | +      | 231001-231144 | hypothetical protein                     | 230290-230433 | +                     | 144         |  |
| 14028S      | STM14_0242  | 378448514         | +      | 239222-239365 | hypothetical protein                     | 238511-238654 | +                     | 144         |  |
| 14028S      | STM14_0256  | 378448527         | +      | 254799-255083 | 30S ribosomal protein S2                 | 254087-254371 | +                     | 285         |  |
| 14028S      | STM14_0262  | 378448533         | +      | 259830-260033 | hypothetical protein                     | 259118-259321 | +                     | 204         |  |
| 14028S      | rcsF        | 378448556         | +      | 285700-286104 | outer membrane lipoprotein               | 284989-285393 | +                     | 405         |  |
| 14028S      | STM14_0291  | 378448561         | -      | 289581-289703 | hypothetical protein                     | 288870-288992 | -                     | 123         |  |
| 14028S      | STM14_0292  | 378448562         | -      | 289616-289819 | hypothetical protein                     | 288905-289108 | -                     | 204         |  |
| 14028S      | STM14_0296  | 378448563         | +      | 291760-291876 | hypothetical protein                     | 291049-291165 | +                     | 117         |  |
| 14028S      | STM14_0310  | 378448574         | -      | 304859-304966 | hypothetical protein                     | 304148-304255 | -                     | 108         |  |
| 14028S      | STM14_0312  | 378448575         | +      | 305167-305274 | hypothetical protein                     | 304456-304563 | +                     | 108         |  |
| 14028S      | STM14_0322  | 378448585         | +      | 316755-316865 | invasol SirA                             | 316044-316154 | +                     | 111         |  |
| 14028S      | STM14_0323  | 378448586         | +      | 316878-317324 | putative cytoplasmic protein             | 316167-316613 | +                     | 447         |  |
| 14028S      | STM14_0337  | 378448600         | +      | 330303-330512 | hypothetical protein                     | 329592-329801 | +                     | 210         |  |
| 14028S      | STM14_0343  | 378448606         | +      | 339144-339275 | hypothetical protein                     | 337935-338066 | +                     | 132         |  |
| 14028S      | STM14_0344  | 378448607         | +      | 339345-339485 | hypothetical protein                     | 338136-338276 | +                     | 141         |  |
| 14028S      | STM14_0346  | 378448609         | -      | 340013-340288 | hypothetical protein                     | 338804-339079 | -                     | 276         |  |
| LT2         | STM04655    | 409994398         | -      | 339629-339871 | hypothetical protein                     | 339105-339347 | -                     | 243         |  |
| ST474       | STM474_0312 | 379699516         | +      | 341562-341681 | hypothetical protein                     | 341560-341679 | +                     | 120         |  |
| 14028S      | safA        | 378448612         | +      | 342894-343406 | putative outer membrane protein          | 341685-342197 | +                     | 513         |  |
| 14028S      | STM14_0357  | 378448617         | +      | 348560-348820 | hypothetical protein                     | 347351-347611 | +                     | 261         |  |
| D23580      | STM14_03133 | 378443750         | +      | 348247-348378 | putative transposase                     | 347752-347883 | +                     | 132         |  |
| 14028S      | STM14_0359  | 378448619         | +      | 350359-350574 | putative cytoplasmic protein             | 349150-349365 | +                     | 216         |  |
| 14028S      | STM14_0361  | 378448621         | -      | 351322-351450 | hypothetical protein                     | 350113-350241 | -                     | 129         |  |
| 14028S      | STM14_0377  | 378448636         | -      | 366783-366935 | hypothetical protein                     | 365573-365725 | -                     | 153         |  |
| UK1         | STMUK_0331  | 378987726         | +      | 369132-369353 | putative inner membrane protein          | 368633-368854 | +                     | 222         |  |
| 14028S      | STM14_0390  | 378448647         | +      | 378258-378530 | putative cytoplasmic protein             | 377048-377320 | +                     | 273         |  |
| 14028S      | STM14_0391  | 378448648         | +      | 379221-379619 | putative outer membrane protein          | 378011-378409 | +                     | 399         |  |
| 14028S      | STM14_0397  | 378448654         | -      | 385733-385843 | hypothetical protein                     | 384523-384633 | -                     | 111         |  |
| 14028S      | STM14_0403  | 378448660         | -      | 390802-390939 | hypothetical protein                     | 389592-389729 | -                     | 138         |  |
| 14028S      | STM14_0406  | 378448663         | +      | 392401-392625 | putative inner membrane protein          | 391191-391415 | +                     | 225         |  |
| 14028S      | STM14_0411  | 378448668         | +      | 399120-399233 | hypothetical protein                     | 397910-398023 | +                     | 114         |  |
| 14028S      | STM14_0415  | 378448672         | +      | 402243-402422 | putative metal-binding transport protein | 401033-401212 | +                     | 180         |  |
| 14028S      | STM14_0419  | 378448676         | +      | 409084-409218 | hypothetical protein                     | 407874-408008 | +                     | 135         |  |
| 14028S      | STM14_0420  | 378448677         | -      | 409118-409237 | hypothetical protein                     | 407908-408027 | -                     | 120         |  |
| 14028S      | STM14_0424  | 378448681         | +      | 411886-412110 | putative cytoplasmic protein             | 410676-410900 | +                     | 225         |  |
| 14028S      | STM14_0430  | 378448687         | +      | 418467-418640 | hypothetical protein                     | 417257-417430 | +                     | 174         |  |
| 14028S      | STM14_0436  | 378448693         | +      | 425565-425684 | hypothetical protein                     | 424355-424474 | +                     | 120         |  |
| 14028S      | STM14_0437  | 378448694         | -      | 425675-425827 | hypothetical protein                     | 424465-424617 | -                     | 153         |  |
| 14028S      | STM14_0441  | 378448698         | -      | 430751-430909 | hypothetical protein                     | 429541-429699 | -                     | 159         |  |
| 14028S      | STM14_0442  | 378448699         | +      | 430925-431059 | hypothetical protein                     | 429715-429849 | +                     | 135         |  |
| 14028S      | STM14_0446  | 378448703         | +      | 433714-433827 | hypothetical protein                     | 432504-432617 | +                     | 114         |  |
| 14028S      | STM14_0451  | 378448708         | +      | 437620-437742 | hypothetical protein                     | 436410-436532 | +                     | 123         |  |
| 14028S      | STM14_0453  | 378448710         | -      | 438082-438243 | hypothetical protein                     | 436872-437033 | -                     | 162         |  |
| 14028S      | STM14_0457  | 378448714         | +      | 440792-440941 | hypothetical protein                     | 439582-439731 | +                     | 150         |  |
| 14028S      | STM14_0464  | 378448721         | -      | 444556-444687 | hypothetical protein                     | 443346-443477 | -                     | 132         |  |
| T000240     | STM04560    | 378982997         | +      | 482933-483049 | hypothetical protein                     | 444371-444487 | +                     | 117         |  |
| 14028S      | STM14_0469  | 378448726         | -      | 451315-451446 | hypothetical protein                     | 450105-450236 | -                     | 132         |  |
| 14028S      | STM14_0472  | 378448729         | -      | 453755-453904 | hypothetical protein                     | 452545-452694 | -                     | 150         |  |
| 14028S      | STM14_0479  | 378448736         | +      | 461340-461450 | DNA metabolism protein                   | 460130-460240 | +                     | 111         |  |
| 14028S      | STM14_0487  | 378448744         | +      | 467631-467846 | hypothetical protein                     | 466421-466636 | +                     | 216         |  |
| D23580      | STM14_04821 | 378443916         | -      | 507659-507985 | hypothetical protein                     | 466639-466965 | -                     | 327         |  |

|         |                 |           |   |               |                                               |               |   |      |
|---------|-----------------|-----------|---|---------------|-----------------------------------------------|---------------|---|------|
| ST474   | STM474_0431     | 379699631 | + | 466787-466939 | hypothetical protein                          | 466784-466936 | + | 153  |
| 140285  | STM14_0491      | 378448747 | + | 469965-470111 | hypothetical protein                          | 468755-468901 | + | 147  |
| 140285  | STM14_0498      | 378448754 | - | 473976-474284 | hypothetical protein                          | 472766-473074 | - | 309  |
| 140285  | STM14_0509      | 378448765 | - | 484792-484902 | hypothetical protein                          | 483582-483692 | - | 111  |
| ST474   | STM474_0464     | 379699664 | - | 497880-498002 | hypothetical protein                          | 497877-497999 | - | 123  |
| 140285  | STM14_0526      | 378448781 | + | 501468-501653 | hypothetical protein                          | 500258-500443 | + | 186  |
| 140285  | STM14_0528      | 378448783 | - | 502053-502166 | hypothetical protein                          | 500843-500956 | - | 114  |
| 140285  | STM14_0531      | 378448786 | + | 504670-504774 | hypothetical protein                          | 503460-503564 | + | 105  |
| 140285  | STM14_0536      | 378448791 | - | 511028-511390 | hypothetical protein                          | 509818-510180 | - | 363  |
| 140285  | STM14_0562      | 378448816 | - | 535085-535210 | hypothetical protein                          | 533877-534002 | - | 126  |
| 140285  | ybaN            | 378448821 | + | 540406-540783 | hypothetical protein                          | 539198-539575 | + | 378  |
| 140285  | STM14_0573      | 378448827 | - | 546597-546818 | hypothetical protein                          | 545389-545610 | - | 222  |
| 140285  | STM14_0575      | 378448829 | + | 547392-547598 | hypothetical protein                          | 546184-546390 | + | 207  |
| 140285  | STM14_0580      | 378448834 | + | 552798-552923 | hypothetical protein                          | 551590-551715 | + | 126  |
| 140285  | STM14_0597      | 378448851 | + | 570227-570331 | hypothetical protein                          | 569018-569122 | + | 105  |
| 140285  | STM14_0599      | 378448853 | - | 571546-571650 | hypothetical protein                          | 570337-570441 | - | 105  |
| 140285  | STM14_0633      | 378448887 | - | 604316-604444 | hypothetical protein                          | 603107-603235 | - | 129  |
| 140285  | STM14_0634      | 378448888 | + | 604400-604555 | hypothetical protein                          | 603191-603346 | + | 156  |
| 140285  | STM14_0645      | 378448899 | + | 614019-614189 | hypothetical protein                          | 612810-612980 | + | 171  |
| 140285  | STM14_0647      | 378448900 | - | 614287-614475 | integrase                                     | 613078-613266 | - | 189  |
| 140285  | STM14_0649      | 378448901 | + | 615283-615441 | hypothetical protein                          | 614074-614232 | + | 159  |
| 140285  | STM14_0659      | 378448908 | - | 622266-622520 | hypothetical protein                          | 621057-621311 | - | 255  |
| 140285  | STM14_0665      | 378448914 | + | 627603-627788 | hypothetical protein                          | 626394-626579 | + | 186  |
| 140285  | STM14_0677      | 378448926 | + | 639577-639684 | hypothetical protein                          | 638368-638475 | + | 108  |
| 140285  | STM14_0683      | 378448932 | - | 644504-644635 | hypothetical protein                          | 643295-643426 | - | 132  |
| 140285  | STM14_0698      | 378448947 | + | 661861-661971 | hypothetical protein                          | 660652-660762 | + | 111  |
| 140285  | STM14_0714      | 378448963 | + | 678228-678434 | hypothetical protein                          | 677205-677411 | + | 207  |
| 140285  | STM14_0715      | 378448964 | - | 678399-678539 | hypothetical protein                          | 677376-677516 | - | 141  |
| 140285  | STM14_0726      | 378448975 | + | 688331-688513 | hypothetical protein                          | 687308-687490 | + | 183  |
| 140285  | STM14_0730      | 378448979 | + | 692333-692443 | hypothetical protein                          | 691310-691420 | + | 111  |
| 140285  | STM14_0735      | 378448984 | + | 694969-695076 | hypothetical protein                          | 693946-694053 | + | 108  |
| 140285  | STM14_0738      | 378448987 | - | 696364-696498 | hypothetical protein                          | 695341-695475 | - | 135  |
| 140285  | STM14_0740      | 378448989 | - | 697584-697727 | hypothetical protein                          | 696561-696704 | - | 144  |
| 140285  | STM14_0742      | 378448991 | + | 698354-698719 | hypothetical protein                          | 697331-697696 | + | 366  |
| 140285  | STM14_0745      | 378448994 | + | 700128-700277 | hypothetical protein                          | 699105-699254 | + | 150  |
| T000240 | STMDT12_C077050 | 378983246 | - | 742985-743125 | hypothetical protein                          | 704327-704667 | - | 141  |
| 140285  | ybeV            | 378449014 | + | 721536-723008 | putative molecular chaperone                  | 720435-721907 | + | 1473 |
| 140285  | STM14_0774      | 378449022 | + | 730309-730596 | hypothetical protein                          | 729208-729495 | + | 288  |
| 140285  | STM14_0777      | 378449025 | - | 733102-733251 | hypothetical protein                          | 732001-732150 | - | 150  |
| 140285  | STM14_0780      | 378449028 | - | 734838-734957 | hypothetical protein                          | 733737-733856 | - | 120  |
| 140285  | STM14_0791      | 378449032 | + | 739310-739477 | hypothetical protein                          | 738211-738378 | + | 168  |
| 140285  | STM14_0797      | 378449038 | - | 745470-745595 | hypothetical protein                          | 744371-744496 | - | 126  |
| 140285  | STM14_0800      | 378449041 | + | 749621-749734 | hypothetical protein                          | 748522-748635 | + | 114  |
| 140285  | STM14_0801      | 378449042 | + | 749864-750154 | hypothetical protein                          | 748765-749055 | + | 291  |
| 140285  | STM14_0809      | 378449050 | + | 757442-757591 | hypothetical protein                          | 756343-756492 | + | 150  |
| 140285  | STM14_0812      | 378449053 | + | 758607-758720 | hypothetical protein                          | 757508-757621 | + | 114  |
| 140285  | STM14_0819      | 378449060 | - | 766193-766318 | hypothetical protein                          | 765094-765219 | - | 126  |
| 140285  | STM14_0820      | 378449061 | + | 766472-766585 | hypothetical protein                          | 765373-765486 | + | 114  |
| 140285  | STM14_0826      | 378449067 | - | 774532-774729 | K <sup>+</sup> -transporting ATPase subunit F | 773433-773630 | - | 198  |
| T000240 | STMDT12_C07730  | 378983314 | - | 820062-820163 | hypothetical protein                          | 780630-780731 | - | 102  |
| 140285  | STM14_0836      | 378449077 | + | 783151-783486 | putative inner membrane protein               | 782052-782387 | + | 336  |
| 140285  | STM14_0850      | 378449091 | + | 797694-798080 | putative inner membrane protein               | 796594-796980 | + | 387  |
| 140285  | STM14_0859      | 378449100 | + | 808472-808597 | hypothetical protein                          | 807372-807497 | + | 126  |
| ST474   | STM474_0763     | 379699951 | + | 807598-807723 | hypothetical protein                          | 807584-807709 | + | 126  |
| ST474   | STM474_0764     | 379699952 | - | 808597-808710 | hypothetical protein                          | 808583-808696 | - | 114  |
| 140285  | STM14_0860      | 378449101 | - | 809819-809962 | hypothetical protein                          | 808719-808862 | - | 144  |
| 140285  | STM14_0864      | 378449105 | + | 812877-813017 | hypothetical protein                          | 811777-811917 | + | 141  |
| 140285  | STM14_0873      | 378449114 | - | 818715-819254 | hypothetical protein                          | 817614-818153 | - | 540  |
| 140285  | STM14_0879      | 378449115 | - | 820227-820322 | hypothetical protein                          | 819126-819221 | - | 96   |
| 140285  | STM14_0897      | 378449132 | - | 837473-837664 | hypothetical protein                          | 836375-836566 | - | 192  |
| 140285  | STM14_0903      | 378449138 | + | 843123-843230 | hypothetical protein                          | 842026-842133 | + | 108  |
| ST474   | STM474_0818     | 379700001 | + | 857893-858006 | hypothetical protein                          | 857882-857995 | + | 114  |
| 140285  | STM14_0924      | 378449158 | + | 864209-864493 | hypothetical protein                          | 863112-863396 | + | 285  |
| 140285  | STM14_0925      | 378449159 | + | 864550-864777 | hypothetical protein                          | 863453-863680 | + | 228  |
| 140285  | STM14_0927      | 378449161 | + | 867104-867277 | putative cytoplasmic protein                  | 866007-866180 | + | 174  |
| 140285  | STM14_0946      | 378449180 | - | 881747-881884 | hypothetical protein                          | 879939-880076 | - | 138  |
| 140285  | STM14_0952      | 378449186 | - | 888006-888110 | hypothetical protein                          | 886198-886302 | - | 105  |
| 140285  | STM14_0956      | 378449190 | + | 891948-892067 | hypothetical protein                          | 890140-890259 | + | 120  |
| 140285  | STM14_0958      | 378449192 | - | 892325-892444 | hypothetical protein                          | 890517-890636 | - | 120  |
| 140285  | STM14_0961      | 378449195 | + | 895674-895811 | hypothetical protein                          | 893866-894003 | + | 138  |
| 140285  | STM14_0965      | 378449199 | - | 898059-898181 | hypothetical protein                          | 896251-896373 | - | 123  |
| 140285  | STM14_0967      | 378449201 | - | 899158-899316 | hypothetical protein                          | 897350-897508 | - | 159  |
| 140285  | STM14_0969      | 378449203 | - | 900254-900415 | hypothetical protein                          | 898446-898607 | - | 162  |
| 140285  | STM14_0970      | 378449204 | - | 900375-900506 | hypothetical protein                          | 898567-898698 | - | 132  |
| 140285  | STM14_0973      | 378449207 | + | 902910-903080 | hypothetical protein                          | 901102-901272 | + | 171  |
| 140285  | STM14_0974      | 378449208 | - | 903009-903137 | hypothetical protein                          | 901201-901329 | - | 129  |
| 140285  | STM14_0982      | 378449216 | + | 911396-911509 | hypothetical protein                          | 909588-909701 | + | 114  |
| 140285  | STM14_0986      | 378449220 | - | 915878-916033 | hypothetical protein                          | 914070-914225 | - | 156  |
| 140285  | STM14_0989      | 378449223 | + | 917997-918137 | hypothetical protein                          | 916189-916329 | + | 141  |
| 140285  | STM14_0995      | 378449229 | - | 924480-924599 | hypothetical protein                          | 922672-922791 | - | 120  |
| 140285  | STM14_0997      | 378449231 | + | 925933-926067 | hypothetical protein                          | 924125-924259 | + | 135  |
| 140285  | STM14_0999      | 378449233 | + | 926622-926762 | hypothetical protein                          | 924814-924954 | + | 141  |
| 140285  | STM14_1000      | 378449234 | + | 926970-927134 | hypothetical protein                          | 925162-925326 | + | 165  |
| 140285  | STM14_1006      | 378449239 | - | 931103-931243 | hypothetical protein                          | 929295-929435 | - | 141  |
| 140285  | STM14_1010      | 378449243 | + | 934780-934917 | hypothetical protein                          | 932973-933110 | + | 138  |
| 140285  | STM14_1019      | 378449251 | + | 942902-943027 | hypothetical protein                          | 941093-941218 | + | 126  |
| 140285  | STM14_1034      | 378449266 | + | 955378-955569 | hypothetical protein                          | 953569-953760 | + | 192  |
| 140285  | STM14_1038      | 378449270 | - | 958765-958965 | hypothetical protein                          | 956956-957156 | - | 201  |
| 140285  | STM14_1053      | 378449285 | + | 972908-973111 | hypothetical protein                          | 971099-971302 | + | 204  |
| 140285  | STM14_1055      | 378449287 | - | 973986-974153 | hypothetical protein                          | 972177-972344 | + | 168  |
| 140285  | STM14_1060      | 378449292 | - | 980013-980138 | hypothetical protein                          | 978204-978329 | - | 126  |
| 140285  | STM14_1061      | 378449293 | + | 980033-980176 | hypothetical protein                          | 978224-978367 | + | 144  |
| 140285  | STM14_1067      | 378449299 | - | 984062-984343 | hypothetical protein                          | 982253-982534 | - | 282  |

|         |              |           |   |                 |                                                       |                 |   |     |
|---------|--------------|-----------|---|-----------------|-------------------------------------------------------|-----------------|---|-----|
| 140285  | STM14_1069   | 378449301 | - | 985102-985260   | hypothetical protein                                  | 983293-983451   | - | 159 |
| 140285  | STM14_1076   | 378449307 | - | 988822-989205   | putative inner membrane protein                       | 987013-987396   | - | 384 |
| 140285  | STM14_1081   | 378449312 | - | 994689-994946   | hypothetical protein                                  | 992880-993137   | - | 258 |
| 140285  | STM14_1082   | 378449313 | - | 994867-995142   | hypothetical protein                                  | 993058-993333   | - | 276 |
| 140285  | STM14_1087   | 378449318 | + | 1001941-1002111 | hypothetical protein                                  | 1000132-1000302 | + | 171 |
| 140285  | STM14_1092   | 378449323 | + | 1007647-1007754 | hypothetical protein                                  | 1005838-1005945 | + | 108 |
| 140285  | STM14_1093   | 378449324 | - | 1007837-1007968 | hypothetical protein                                  | 1006028-1006159 | - | 132 |
| 140285  | STM14_1097   | 378449328 | - | 1011963-1012289 | putative cytoplasmic protein                          | 1010154-1010480 | - | 327 |
| 140285  | STM14_1102   | 378449333 | + | 1018831-1018959 | hypothetical protein                                  | 1017022-1017150 | + | 129 |
| 140285  | STM14_1104   | 378449335 | + | 1019641-1019754 | hypothetical protein                                  | 1017832-1017945 | + | 114 |
| 140285  | STM14_1108   | 378449339 | - | 1023127-1023381 | hypothetical protein                                  | 1021318-1021572 | - | 255 |
| 140285  | STM14_1118   | 378449349 | - | 1033792-1033944 | hypothetical protein                                  | 1031983-1032135 | - | 153 |
| 140285  | STM14_1129   | 378449360 | - | 1047995-1048126 | hypothetical protein                                  | 1046186-1046317 | - | 132 |
| 140285  | STM14_1131   | 378449362 | + | 1049521-1049673 | hypothetical protein                                  | 1047712-1047864 | + | 153 |
| 140285  | STM14_1133   | 378449364 | - | 1051307-1051426 | hypothetical protein                                  | 1049498-1049617 | - | 120 |
| 140285  | STM14_1135   | 378449366 | - | 1051897-1052118 | hypothetical protein                                  | 1050088-1050309 | - | 222 |
| 140285  | STM14_1137   | 378449368 | + | 1053504-1053662 | hypothetical protein                                  | 1051694-1051852 | + | 159 |
| 140285  | STM14_1142   | 378449373 | - | 1058213-1058452 | hypothetical protein                                  | 1056403-1056642 | - | 240 |
| 140285  | STM14_1145   | 378449376 | - | 1062627-1062926 | hypothetical protein                                  | 1060859-1061158 | - | 300 |
| ST474   | STM474_0999  | 379700176 | + | 1061436-1061582 | hypothetical protein                                  | 1061460-1061606 | + | 147 |
| 140285  | STM14_1148   | 378449379 | - | 1063409-1063819 | regulatory protein                                    | 1061641-1062051 | - | 411 |
| ST474   | STM474_1001  | 379700178 | + | 1061983-1062096 | hypothetical protein                                  | 1062007-1062120 | + | 114 |
| 140285  | STM14_1149   | 378449380 | + | 1063939-1064178 | hypothetical protein                                  | 1062171-1062410 | + | 240 |
| 140285  | STM14_1157   | 378449388 | + | 1068009-1068230 | hypothetical protein                                  | 1066241-1066462 | + | 222 |
| 140285  | STM14_1159   | 378449390 | + | 1068921-1069121 | hypothetical protein                                  | 1067153-1067353 | + | 201 |
| 140285  | STM14_1161   | 378449392 | + | 1069732-1069878 | hypothetical protein                                  | 1067964-1068110 | + | 147 |
| 140285  | STM14_1164   | 378449395 | + | 1071223-1071348 | hypothetical protein                                  | 1069455-1069580 | + | 126 |
| 140285  | STM14_1165   | 378449396 | - | 1071484-1071933 | hypothetical protein                                  | 1067916-1070165 | - | 450 |
| 140285  | STM14_3197   | 378451364 | + | 2811771-2811908 | hypothetical protein                                  | 1071308-1071445 | - | 138 |
| D23580  | STM14_10422  | 378444470 | + | 1114868-1115074 | prophage protein                                      | 1075583-1075789 | + | 207 |
| ST474   | STM474_1045  | 379700222 | + | 1098511-1098666 | hypothetical protein                                  | 1098767-1098922 | + | 156 |
| 140285  | STM14_1196   | 378449426 | - | 1100627-1100926 | hypothetical protein                                  | 1098860-1099159 | - | 300 |
| 140285  | STM14_1201   | 378449431 | - | 1106320-1106445 | hypothetical protein                                  | 1104553-1104678 | - | 126 |
| 140285  | STM14_1209   | 378449439 | - | 1115818-1116021 | hypothetical protein                                  | 1114053-1114256 | - | 204 |
| 140285  | rmf          | 378449440 | + | 1115985-1116152 | ribosome modulation factor                            | 1114220-1114387 | + | 168 |
| 140285  | STM14_1216   | 378449446 | - | 1121248-1121352 | hypothetical protein                                  | 1119483-1119587 | - | 105 |
| T000240 | STM14_C11030 | 378983644 | + | 1169756-1169860 | hypothetical protein                                  | 1128650-1128754 | + | 105 |
| 140285  | STM14_1234   | 378449463 | + | 1135671-1135796 | hypothetical protein                                  | 1133906-1134031 | + | 126 |
| 140285  | STM14_1235   | 378449464 | + | 1135887-1136207 | putative inner membrane protein                       | 1134122-1134442 | + | 321 |
| 140285  | orfX         | 378449467 | + | 1138592-1138762 | putative cytoplasmic protein                          | 1136827-1136997 | + | 171 |
| 140285  | STM14_1239   | 378449468 | - | 1138763-1138873 | putative cytoplasmic protein                          | 1136998-1137108 | - | 111 |
| 140285  | STM14_1245   | 378449474 | + | 1143361-1143543 | hypothetical protein                                  | 1141596-1141778 | + | 183 |
| 140285  | STM14_1249   | 378449478 | - | 1146275-1146388 | hypothetical protein                                  | 1144510-1144623 | - | 114 |
| 140285  | STM14_1254   | 378449483 | - | 1150549-1150701 | hypothetical protein                                  | 1148784-1148936 | - | 153 |
| 140285  | STM14_1260   | 378449489 | - | 1155618-1155782 | hypothetical protein                                  | 1153853-1154017 | - | 165 |
| 140285  | STM14_1261   | 378449490 | - | 1156022-1156384 | hypothetical protein                                  | 1154257-1154619 | - | 363 |
| 140285  | STM14_1262   | 378449491 | + | 1156832-1156987 | hypothetical protein                                  | 1155067-1155222 | + | 156 |
| 140285  | STM14_1265   | 378449494 | - | 1158383-1158577 | hypothetical protein                                  | 1156618-1156812 | - | 195 |
| 140285  | STM14_1273   | 378449502 | + | 1164294-1164521 | hypothetical protein                                  | 1162529-1162756 | + | 228 |
| 140285  | STM14_1279   | 378449506 | - | 1170030-1170278 | hypothetical protein                                  | 1168265-1168513 | - | 249 |
| 140285  | STM14_1280   | 378449507 | - | 1170167-1170286 | hypothetical protein                                  | 1168402-1168521 | - | 120 |
| 140285  | STM14_1282   | 378449509 | + | 1172347-1172457 | hypothetical protein                                  | 1170582-1170692 | + | 111 |
| 140285  | STM14_1283   | 378449510 | + | 1172451-1172747 | hypothetical protein                                  | 1170686-1170982 | + | 297 |
| 140285  | STM14_1286   | 378449512 | + | 1174679-1174783 | hypothetical protein                                  | 1172914-1173018 | + | 105 |
| 140285  | STM14_1288   | 378449514 | + | 1176314-1176421 | hypothetical protein                                  | 1174549-1174656 | + | 108 |
| 140285  | STM14_1289   | 378449515 | - | 1176396-1176605 | hypothetical protein                                  | 1174631-1174840 | - | 210 |
| 140285  | STM14_1291   | 378449517 | - | 1177413-1177520 | hypothetical protein                                  | 1175648-1175755 | - | 108 |
| 140285  | STM14_1292   | 378449518 | + | 1177573-1177704 | hypothetical protein                                  | 1175808-1175939 | + | 132 |
| 140285  | STM14_1298   | 378449523 | - | 1183064-1183228 | hypothetical protein                                  | 1181115-1181279 | - | 165 |
| 140285  | STM14_1307   | 378449532 | - | 1188559-1188696 | hypothetical protein                                  | 1186610-1186747 | - | 138 |
| 140285  | STM14_1308   | 378449533 | - | 1188894-1189040 | hypothetical protein                                  | 1186945-1187091 | - | 147 |
| 140285  | STM14_1316   | 378449541 | - | 1194339-1194509 | hypothetical protein                                  | 1192391-1192561 | - | 171 |
| 140285  | STM14_1322   | 378449547 | + | 1200601-1201062 | hypothetical protein                                  | 1198653-1199114 | + | 462 |
| 140285  | STM14_1327   | 378449552 | + | 1204177-1204380 | hypothetical protein                                  | 1202229-1202432 | + | 204 |
| 140285  | STM14_1339   | 378449564 | - | 1212983-1213159 | hypothetical protein                                  | 1211035-1211211 | - | 177 |
| 140285  | STM14_1344   | 378449569 | - | 1216241-1216396 | flagellar basal body P-ring biosynthesis protein FlgA | 1214293-1214448 | - | 156 |
| 140285  | STM14_1356   | 378449581 | - | 1226280-1226474 | hypothetical protein                                  | 1224332-1224526 | - | 195 |
| 140285  | rpmF         | 378449588 | + | 1234009-1234182 | 50S ribosomal protein L32                             | 1232061-1232234 | + | 174 |
| 140285  | STM14_1376   | 378449600 | - | 1244261-1244398 | hypothetical protein                                  | 1242313-1242450 | - | 138 |
| 140285  | STM14_1390   | 378449614 | - | 1256910-1257065 | hypothetical protein                                  | 1254962-1255117 | - | 156 |
| 140285  | STM14_1399   | 378449623 | - | 1267794-1267916 | hypothetical protein                                  | 1265846-1265968 | - | 123 |
| 140285  | STM14_1401   | 378449625 | - | 1269076-1269240 | hypothetical protein                                  | 1267128-1267292 | - | 165 |
| 140285  | STM14_1487   | 378449708 | - | 1337214-1337372 | hypothetical protein                                  | 1284165-1284323 | - | 159 |
| 140285  | STM14_1488   | 378449709 | + | 1337312-1337452 | hypothetical protein                                  | 1284263-1284403 | + | 141 |
| 140285  | STM14_1489   | 378449710 | + | 1337337-1337585 | hypothetical protein                                  | 1284288-1284536 | + | 249 |
| LT2     | STM05040     | 409994415 | - | 1327664-1327867 | hypothetical protein                                  | 1284590-1284793 | - | 204 |
| 140285  | envE         | 378449713 | - | 1339871-1340392 | putative envelope protein                             | 1286822-1287343 | - | 522 |
| 140285  | STM14_1494   | 378449714 | - | 1340405-1340575 | hypothetical protein                                  | 1287356-1287526 | - | 171 |
| 140285  | STM14_1495   | 378449715 | - | 1340807-1341019 | cold shock-like protein                               | 1287758-1287970 | - | 213 |
| 140285  | STM14_1496   | 378449716 | - | 1341060-1341188 | hypothetical protein                                  | 1288011-1288139 | - | 129 |
| 140285  | pagD         | 378449717 | - | 1341151-1341414 | virulence protein PAGD precursor                      | 1288102-1288365 | - | 264 |
| 140285  | STM14_1499   | 378449718 | + | 1341718-1341825 | hypothetical protein                                  | 1288669-1288776 | + | 108 |
| 140285  | STM14_1500   | 378449719 | - | 1342043-1342192 | hypothetical protein                                  | 1288994-1289143 | - | 150 |
| 140285  | STM14_1502   | 378449721 | - | 1342962-1343096 | hypothetical protein                                  | 1289913-1290047 | - | 135 |
| 140285  | STM14_1506   | 378449723 | - | 1344493-1344636 | hypothetical protein                                  | 1291444-1291587 | - | 144 |
| 140285  | STM14_1507   | 378449724 | + | 1344742-1344867 | putative lipoprotein                                  | 1291693-1291818 | + | 126 |
| ST474   | STM474_1249  | 379700419 | - | 1291877-1292050 | hypothetical protein                                  | 1291950-1292123 | - | 174 |
| 140285  | STM14_1508   | 378449725 | + | 1345067-1345339 | putative cytoplasmic protein                          | 1292018-1292290 | + | 273 |
| 140285  | STM14_1510   | 378449727 | - | 1346067-1346216 | putative inner membrane protein                       | 1293018-1293167 | - | 150 |
| 140285  | STM14_1513   | 378449730 | - | 1348102-1348416 | putative outer membrane lipoprotein                   | 1295053-1295367 | - | 315 |
| 140285  | STM14_1514   | 378449731 | - | 1348508-1348666 | hypothetical protein                                  | 1295459-1295617 | - | 159 |
| 140285  | STM14_1524   | 378449740 | - | 1356451-1356600 | hypothetical protein                                  | 1303402-1303551 | - | 150 |
| 140285  | STM14_1528   | 378449744 | + | 1358977-1359201 | hypothetical protein                                  | 1305928-1306152 | + | 225 |

|         |                |           |   |                 |                                                 |                 |   |     |
|---------|----------------|-----------|---|-----------------|-------------------------------------------------|-----------------|---|-----|
| 14028S  | STM14_1533     | 378449749 | - | 1361225-1361380 | hypothetical protein                            | 1308177-1308332 | - | 156 |
| 14028S  | STM14_1536     | 378449752 | - | 1362034-1362159 | hypothetical protein                            | 1308985-1309110 | - | 126 |
| 14028S  | STM14_1540     | 378449756 | - | 1363413-1363529 | hypothetical protein                            | 1310364-1310480 | - | 117 |
| 14028S  | STM14_1541     | 378449757 | - | 1363501-1363599 | hypothetical protein                            | 1310452-1310550 | - | 99  |
| 14028S  | STM14_1545     | 378449761 | - | 1364743-1364856 | hypothetical protein                            | 1311694-1311807 | - | 114 |
| 14028S  | STM14_1546     | 378449762 | + | 1364774-1364911 | hypothetical protein                            | 1311725-1311862 | + | 138 |
| 14028S  | STM14_1550     | 378449766 | + | 1367385-1367522 | hypothetical protein                            | 1314336-1314473 | + | 138 |
| 14028S  | STM14_1551     | 378449767 | + | 1367589-1367696 | putative inner membrane protein                 | 1314540-1314647 | + | 108 |
| 14028S  | STM14_1557     | 378449773 | + | 1371682-1371801 | hypothetical protein                            | 1318635-1318754 | + | 120 |
| ST474   | STM474_1289    | 379700457 | + | 1320526-1320669 | hypothetical protein                            | 1320602-1320745 | + | 144 |
| 14028S  | STM14_1559     | 378449775 | - | 1373854-1374027 | hypothetical protein                            | 1320805-1320978 | - | 174 |
| 14028S  | STM14_1564     | 378449780 | - | 1378335-1378511 | hypothetical protein                            | 1325286-1325462 | - | 177 |
| 14028S  | STM14_1566     | 378449782 | + | 1379655-1379795 | hypothetical protein                            | 1326606-1326746 | + | 141 |
| 14028S  | STM14_1569     | 378449785 | + | 1380898-1381002 | hypothetical protein                            | 1327850-1327954 | + | 105 |
| 14028S  | STM14_1572     | 378449788 | + | 1382785-1382889 | hypothetical protein                            | 1329737-1329841 | + | 105 |
| 14028S  | STM14_1581     | 378449797 | + | 1391859-1392038 | hypothetical protein                            | 1338811-1338990 | + | 180 |
| 14028S  | STM14_1587     | 378449803 | + | 1398234-1398449 | hypothetical protein                            | 1345186-1345401 | + | 216 |
| ST474   | STM474_1315    | 379700483 | + | 1347752-1347886 | hypothetical protein                            | 1347827-1347961 | + | 135 |
| 14028S  | STM14_1591     | 378449807 | - | 1400923-1401129 | hypothetical protein                            | 1347875-1348081 | - | 207 |
| 14028S  | STM14_1593     | 378449809 | + | 1401610-1401732 | hypothetical protein                            | 1348562-1348684 | + | 123 |
| 14028S  | STM14_1601     | 378449817 | + | 1409372-1409509 | hypothetical protein                            | 1356324-1356461 | + | 138 |
| 14028S  | STM14_1602     | 378449818 | - | 1409399-1409647 | hypothetical protein                            | 1356351-1356599 | - | 249 |
| 14028S  | STM14_1615     | 378449831 | + | 1419534-1419740 | hypothetical protein                            | 1366486-1366692 | + | 207 |
| 14028S  | STM14_1617     | 378449833 | + | 1421769-1421954 | hypothetical protein                            | 1368721-1368906 | + | 186 |
| 14028S  | STM14_1618     | 378449834 | + | 1421956-1422090 | hypothetical protein                            | 1368908-1369042 | + | 135 |
| 14028S  | STM14_1623     | 378449839 | - | 1425398-1425562 | hypothetical protein                            | 1372350-1372514 | - | 165 |
| 14028S  | STM14_1631     | 378449847 | - | 1432577-1432696 | hypothetical protein                            | 1379529-1379648 | - | 120 |
| 14028S  | STM14_1636     | 378449852 | + | 1436467-1436571 | hypothetical protein                            | 1383419-1383523 | + | 105 |
| ST474   | STM474_1353    | 379700521 | + | 1384122-1384307 | hypothetical protein                            | 1384197-1384382 | + | 186 |
| 14028S  | STM14_1638     | 378449854 | - | 1437586-1437699 | hypothetical protein                            | 1384538-1384651 | - | 114 |
| 14028S  | STM14_1645     | 378449861 | - | 1445506-1445658 | hypothetical protein                            | 1392458-1392610 | - | 153 |
| 14028S  | STM14_1652     | 378449868 | + | 1452598-1452744 | hypothetical protein                            | 1399549-1399695 | + | 147 |
| 14028S  | STM14_1653     | 378449869 | - | 1452728-1452838 | hypothetical protein                            | 1399679-1399789 | - | 111 |
| 14028S  | STM14_1658     | 378449873 | - | 1456308-1456475 | hypothetical protein                            | 1403256-1403423 | - | 168 |
| ST474   | STM474_1383    | 379700550 | - | 1418471-1418587 | hypothetical protein                            | 1418542-1418658 | - | 117 |
| ST474   | STM474_1395    | 379700562 | + | 1431868-1432002 | hypothetical protein                            | 1431939-1432073 | + | 135 |
| 14028S  | STM14_1685     | 378449900 | - | 1486016-1486129 | hypothetical protein                            | 1432963-1433076 | - | 114 |
| 14028S  | ssaB           | 378449903 | + | 1489975-1490376 | secreted effector protein                       | 1436922-1437323 | + | 402 |
| 14028S  | STM14_1692     | 378449907 | + | 1493410-1493517 | hypothetical protein                            | 1440357-1440464 | + | 108 |
| 14028S  | STM14_1693     | 378449908 | + | 1493577-1493903 | secretion system chaperone protein              | 1440524-1440850 | + | 327 |
| 14028S  | sseE           | 378449913 | + | 1497033-1497449 | secreted effector protein                       | 1443980-1444396 | + | 417 |
| 14028S  | sseG           | 378449916 | + | 1498730-1499419 | secreted effector protein                       | 1445677-1446366 | + | 690 |
| 14028S  | ssaM           | 378449924 | + | 1503279-1503647 | type III secretion system apparatus protein     | 1450226-1450594 | + | 369 |
| 14028S  | ssaS           | 378449931 | + | 1509364-1509630 | type III secretion system apparatus protein     | 1456311-1456577 | + | 267 |
| 14028S  | STM14_1719     | 378449934 | + | 1511477-1511602 | hypothetical protein                            | 1458424-1458549 | + | 126 |
| 14028S  | STM14_1728     | 378449941 | + | 1519171-1519452 | hypothetical protein                            | 1466118-1466399 | + | 282 |
| 14028S  | ydH            | 378449954 | - | 1529425-1529661 | putative inner membrane protein                 | 1476373-1476609 | - | 237 |
| 14028S  | STM14_1751     | 378449964 | + | 1538110-1538277 | hypothetical protein                            | 1485058-1485225 | + | 168 |
| 14028S  | STM14_1761     | 410023179 | - | 1546024-1546179 | hypothetical protein                            | 1492785-1492940 | - | 156 |
| 14028S  | STM14_1764     | 378449977 | + | 1548438-1548683 | hypothetical protein                            | 1495199-1495444 | + | 246 |
| 14028S  | STM14_1771     | 378449982 | + | 1553745-1553906 | fumarase A                                      | 1500506-1500667 | + | 162 |
| 14028S  | STM14_1776     | 378449987 | - | 1559385-1559690 | outer membrane protein                          | 1506146-1506451 | - | 306 |
| 14028S  | STM14_1782     | 378449992 | - | 1563882-1564016 | putative amino acid permease                    | 1510643-1510777 | - | 135 |
| 14028S  | STM14_1783     | 378449993 | - | 1563914-1564087 | hypothetical protein                            | 1510675-1510848 | - | 174 |
| 14028S  | STM14_1784     | 378449994 | + | 1564099-1564224 | hypothetical protein                            | 1510860-1510985 | + | 126 |
| 14028S  | STM14_1786     | 378449996 | + | 1565234-1565359 | hypothetical protein                            | 1511995-1512120 | + | 126 |
| 14028S  | STM14_1790     | 378450000 | + | 1569946-1570116 | hypothetical protein                            | 1516707-1516877 | + | 171 |
| 14028S  | STM14_1794     | 378450004 | - | 1571734-1572027 | hypothetical protein                            | 1518495-1518788 | - | 294 |
| 14028S  | STM14_1795     | 378450005 | - | 1572036-1572284 | acid shock protein                              | 1518797-1519045 | - | 249 |
| 14028S  | STM14_1796     | 378450006 | - | 1572462-1572653 | hypothetical protein                            | 1519223-1519414 | - | 192 |
| T000240 | STMDT12_C14990 | 378984040 | + | 1560231-1560323 | hypothetical protein                            | 1519281-1519373 | + | 93  |
| 14028S  | STM14_1810     | 378450020 | - | 1586812-1587033 | putative dimethyl sulfoxide reductase subunit A | 1533573-1533794 | - | 222 |
| 14028S  | STM14_1816     | 378450026 | - | 1591641-1591757 | hypothetical protein                            | 1538402-1538518 | - | 117 |
| ST474   | STM474_1518    | 379700677 | - | 1542834-1542947 | hypothetical protein                            | 1542719-1542832 | - | 114 |
| 14028S  | STM14_1827     | 378450036 | - | 1601704-1601919 | hypothetical protein                            | 1548465-1548680 | - | 216 |
| 14028S  | STM14_1828     | 378450037 | + | 1601786-1601923 | peptidyl-di-peptidase dcp                       | 1548547-1548684 | + | 138 |
| 14028S  | STM14_1831     | 378450040 | - | 1602970-1603068 | hypothetical protein                            | 1549731-1549829 | - | 99  |
| 14028S  | STM14_1833     | 378450042 | - | 1603865-1604014 | hypothetical protein                            | 1550626-1550775 | - | 150 |
| T000240 | STMDT12_C15310 | 378984072 | - | 1591761-1591856 | hypothetical protein                            | 1550809-1550904 | - | 96  |
| 14028S  | STM14_1847     | 378450056 | + | 1615524-1615850 | putative inner membrane protein                 | 1562284-1562610 | + | 327 |
| 14028S  | STM14_1858     | 378450067 | - | 1625009-1625161 | hypothetical protein                            | 1571769-1571921 | - | 153 |
| 14028S  | STM14_1867     | 378450076 | - | 1634718-1634879 | hypothetical protein                            | 1581478-1581639 | - | 162 |
| 14028S  | STM14_1871     | 378450080 | - | 1636816-1637064 | putative cytoplasmic protein                    | 1583576-1583824 | - | 249 |
| 14028S  | STM14_1872     | 378450081 | + | 1637216-1637431 | putative phage-related secreted protein         | 1583976-1584191 | + | 216 |
| UK1     | STMUK_1520     | 378988892 | + | 1587048-1587440 | hypothetical protein                            | 1585617-1586009 | + | 393 |
| UK1     | STMUK_1521     | 378988893 | + | 1587577-1587705 | hypothetical protein                            | 1586146-1586274 | + | 129 |
| 14028S  | STM14_1876     | 378450084 | - | 1639903-1640112 | hypothetical protein                            | 1586663-1586872 | - | 210 |
| 14028S  | rpsV           | 378450096 | + | 1655468-1655611 | 30S ribosomal subunit S22                       | 1602227-1602370 | + | 144 |
| ST474   | STM474_1578    | 379700736 | - | 1602385-1602519 | hypothetical protein                            | 1602268-1602402 | - | 135 |
| 14028S  | STM14_1890     | 378450098 | + | 1657503-1657634 | hypothetical protein                            | 1604262-1604393 | + | 132 |
| 14028S  | STM14_1895     | 378450103 | + | 1663489-1663641 | hypothetical protein                            | 1610248-1610400 | + | 153 |
| 14028S  | STM14_1897     | 378450105 | - | 1664885-1665067 | hypothetical protein                            | 1611644-1611826 | - | 183 |
| 14028S  | STM14_1902     | 378450110 | + | 1668962-1669093 | hypothetical protein                            | 1615721-1615852 | + | 132 |
| 14028S  | STM14_1904     | 378450112 | - | 1670559-1670702 | hypothetical protein                            | 1617318-1617461 | - | 144 |
| 14028S  | STM14_1911     | 378450119 | - | 1679194-1679457 | hypothetical protein                            | 1625953-1626216 | - | 264 |
| 14028S  | STM14_1913     | 378450121 | + | 1680178-1680390 | hypothetical protein                            | 1626937-1627149 | + | 213 |
| 14028S  | STM14_1914     | 378450122 | - | 1680335-1680472 | hypothetical protein                            | 1627094-1627231 | - | 138 |
| 14028S  | STM14_1915     | 378450123 | + | 1680342-1680476 | hypothetical protein                            | 1627101-1627235 | + | 135 |
| 14028S  | STM14_1919     | 378450127 | - | 1683664-1683783 | hypothetical protein                            | 1630423-1630542 | - | 120 |
| 14028S  | STM14_1922     | 378450130 | + | 1686850-1686699 | hypothetical protein                            | 1633609-1633728 | + | 120 |
| 14028S  | STM14_1923     | 378450131 | - | 1686958-1687080 | hypothetical protein                            | 1633717-1633839 | - | 123 |
| 14028S  | STM14_1932     | 410023183 | + | 1696611-1696706 | hypothetical protein                            | 1643370-1643465 | + | 96  |
| 14028S  | STM14_1933     | 378450141 | + | 1696703-1696807 | hypothetical protein                            | 1643462-1643566 | + | 105 |

|         |                |           |   |                 |                                 |                 |   |     |
|---------|----------------|-----------|---|-----------------|---------------------------------|-----------------|---|-----|
| 14028S  | STM14_1937     | 378450145 | - | 1700960-1701190 | putative inner membrane protein | 1647719-1647949 | - | 231 |
| 14028S  | ugtL           | 378450146 | - | 1701223-1701621 | hypothetical protein            | 1647982-1648380 | - | 399 |
| 14028S  | STM14_1939     | 378450147 | - | 1701681-1701785 | hypothetical protein            | 1648440-1648544 | - | 105 |
| 14028S  | STM14_1950     | 378450158 | + | 1711642-1711749 | hypothetical protein            | 1658401-1658508 | + | 108 |
| 14028S  | STM14_1961     | 378450169 | + | 1719701-1719814 | hypothetical protein            | 1666460-1666573 | + | 114 |
| 14028S  | STM14_1967     | 378450175 | + | 1727480-1727695 | hypothetical protein            | 1674239-1674454 | + | 216 |
| 14028S  | STM14_1970     | 378450178 | + | 1729598-1729999 | putative dipicolinate reductase | 1676357-1676758 | + | 402 |
| T000240 | STMDT12_C16480 | 378984189 | - | 1717552-1717677 | hypothetical protein            | 1676597-1676722 | - | 126 |
| ST474   | STM474_1641    | 379700799 | + | 1676859-1677014 | hypothetical protein            | 1676742-1676897 | + | 156 |
| 14028S  | STM14_1972     | 378450180 | - | 1731028-1731132 | hypothetical protein            | 1677787-1677891 | - | 105 |
| 14028S  | STM14_1973     | 378450181 | + | 1731115-1731225 | hypothetical protein            | 1677874-1677984 | + | 111 |
| 14028S  | STM14_1976     | 378450184 | - | 1733662-1733814 | hypothetical protein            | 1680421-1680573 | - | 153 |
| T000240 | STMDT12_C16570 | 378984198 | - | 1726118-1726213 | hypothetical protein            | 1685163-1685258 | - | 96  |
| 14028S  | STM14_1994     | 378450202 | + | 1751742-1752041 | hypothetical protein            | 1698501-1698800 | + | 300 |
| 14028S  | STM14_1996     | 378450204 | - | 1755685-1755894 | hypothetical protein            | 1702444-1702653 | - | 210 |
| T000240 | STMDT12_C16740 | 378984215 | - | 1744637-1744789 | hypothetical protein            | 1703682-1703834 | - | 153 |
| 14028S  | STM14_2004     | 378450212 | - | 1762419-1762580 | hypothetical protein            | 1709178-1709339 | - | 162 |
| 14028S  | STM14_2024     | 378450229 | - | 1779789-1779902 | hypothetical protein            | 1726548-1726661 | - | 114 |
| 14028S  | STM14_2048     | 378450253 | - | 1800491-1800673 | hypothetical protein            | 1746538-1746684 | - | 147 |
| 14028S  | STM14_2049     | 378450254 | + | 1800647-1800769 | hypothetical protein            | 1746694-1746816 | + | 123 |
| 14028S  | STM14_2051     | 378450256 | + | 1802254-1802433 | hypothetical protein            | 1748301-1748480 | + | 180 |
| 14028S  | ycjE           | 378450257 | + | 1802408-1802707 | putative cytoplasmic protein    | 1748455-1748754 | + | 300 |
| 14028S  | STM14_2054     | 378450259 | - | 1803682-1803798 | hypothetical protein            | 1749729-1749845 | - | 117 |
| 14028S  | STM14_2057     | 378450262 | + | 1807079-1807216 | hypothetical protein            | 1753126-1753263 | + | 138 |
| 14028S  | STM14_2061     | 378450266 | - | 1810467-1810628 | hypothetical protein            | 1756514-1756675 | - | 162 |
| 14028S  | STM14_2065     | 378450270 | + | 1812029-1812142 | hypothetical protein            | 1758076-1758189 | + | 114 |
| 14028S  | STM14_2071     | 378450276 | - | 1818504-1818674 | hypothetical protein            | 1764551-1764721 | - | 171 |
| ST474   | ymia           | 379700885 | - | 1764839-1764967 | hypothetical protein            | 1764722-1764850 | - | 129 |
| 14028S  | STM14_2073     | 378450278 | + | 1820026-1820190 | hypothetical protein            | 1766073-1766237 | + | 165 |
| 14028S  | STM14_2076     | 378450281 | - | 1823233-1823364 | hypothetical protein            | 1769280-1769411 | - | 132 |
| 14028S  | STM14_2079     | 378450284 | + | 1824904-1825014 | hypothetical protein            | 1770951-1771061 | + | 111 |
| 14028S  | trpL           | 378450289 | + | 1829100-1829144 | trp operon leader peptide       | 1775147-1775191 | + | 45  |
| 14028S  | STM14_2102     | 378450306 | - | 1843241-1843414 | hypothetical protein            | 1789288-1789461 | - | 174 |
| 14028S  | STM14_2111     | 378450314 | + | 1851996-1852310 | putative inner membrane protein | 1798043-1798357 | + | 315 |
| 14028S  | STM14_2117     | 378450320 | + | 1858398-1858580 | hypothetical protein            | 1804445-1804627 | + | 183 |
| 14028S  | STM14_2123     | 378450326 | - | 1863160-1863279 | hypothetical protein            | 1809207-1809326 | - | 120 |
| 14028S  | STM14_2128     | 378450328 | + | 1865980-1866144 | hypothetical protein            | 1811505-1811669 | + | 165 |
| 14028S  | STM14_2133     | 378450333 | + | 1872924-1873043 | hypothetical protein            | 1818449-1818568 | + | 120 |
| 14028S  | STM14_2135     | 378450335 | - | 1874718-1874903 | hypothetical protein            | 1820243-1820428 | - | 186 |
| 14028S  | STM14_2148     | 378450348 | - | 1886567-1886695 | hypothetical protein            | 1832092-1832220 | - | 129 |
| 14028S  | STM14_2151     | 378450351 | - | 1888181-1888351 | hypothetical protein            | 1833706-1833876 | - | 171 |
| 14028S  | STM14_2152     | 378450352 | - | 1888329-1888433 | hypothetical protein            | 1833854-1833958 | - | 105 |
| 14028S  | STM14_2158     | 378450358 | - | 1893588-1893701 | hypothetical protein            | 1839113-1839226 | - | 114 |
| 14028S  | STM14_2160     | 378450360 | - | 1895293-1895421 | hypothetical protein            | 1840818-1840946 | - | 129 |
| 14028S  | STM14_2169     | 378450369 | + | 1903787-1903876 | hypothetical protein            | 1849312-1849401 | + | 90  |
| 14028S  | STM14_2171     | 378450371 | - | 1905555-1905662 | hypothetical protein            | 1851080-1851187 | - | 108 |
| 14028S  | STM14_2180     | 378450380 | - | 1914824-1914934 | hypothetical protein            | 1860349-1860459 | - | 111 |
| 14028S  | STM14_2187     | 378450387 | + | 1920441-1920557 | hypothetical protein            | 1865966-1866082 | + | 117 |
| 14028S  | STM14_2188     | 378450388 | - | 1920620-1920757 | putative cytoplasmic protein    | 1866145-1866282 | - | 138 |
| 14028S  | STM14_2189     | 378450389 | - | 1920801-1920899 | hypothetical protein            | 1866326-1866424 | - | 99  |
| 14028S  | STM14_2200     | 378450400 | + | 1928329-1928355 | hypothetical protein            | 1873853-1874059 | + | 207 |
| 14028S  | STM14_2211     | 378450411 | - | 1939453-1939788 | putative cytoplasmic protein    | 1884977-1885312 | - | 336 |
| 14028S  | STM14_2219     | 378450419 | - | 1946749-1946859 | hypothetical protein            | 1892273-1892383 | - | 111 |
| 14028S  | yobF           | 378450421 | - | 1947174-1947317 | putative cytoplasmic protein    | 1892698-1892841 | - | 144 |
| 14028S  | STM14_2222     | 378450422 | + | 1947434-1947541 | hypothetical protein            | 1892958-1893065 | + | 108 |
| 14028S  | STM14_2223     | 378450423 | + | 1947556-1947696 | hypothetical protein            | 1893080-1893220 | + | 141 |
| 14028S  | STM14_2224     | 378450424 | - | 1947624-1947740 | hypothetical protein            | 1893148-1893264 | - | 117 |
| 14028S  | STM14_2229     | 378450429 | - | 1949871-1949978 | hypothetical protein            | 1895396-1895503 | - | 108 |
| 14028S  | STM14_2238     | 378450438 | + | 1961391-1961522 | hypothetical protein            | 1906916-1907047 | + | 132 |
| ST474   | STM474_1877    | 379701031 | - | 1908925-1909098 | hypothetical protein            | 1908287-1908460 | - | 174 |
| 14028S  | STM14_2243     | 378450443 | + | 1963183-1963311 | hypothetical protein            | 1908708-1908836 | + | 129 |
| 14028S  | STM14_2245     | 378450445 | + | 1964429-1964551 | hypothetical protein            | 1909954-1910076 | + | 123 |
| 14028S  | STM14_2246     | 378450446 | - | 1964644-1964787 | hypothetical protein            | 1910169-1910312 | - | 144 |
| D23580  | STMMW_18461    | 378445260 | + | 1947071-1947241 | hypothetical protein            | 1910771-1910941 | + | 171 |
| 14028S  | STM14_2249     | 378450449 | - | 1966412-1966831 | putative acetyltransferase      | 1911937-1912356 | - | 420 |
| 14028S  | STM14_2250     | 378450450 | - | 1966960-1967154 | hypothetical protein            | 1912485-1912679 | - | 195 |
| ST474   | STM474_1884    | 379701038 | - | 1913724-1913852 | hypothetical protein            | 1913086-1913214 | - | 129 |
| 14028S  | STM14_2255     | 378450453 | - | 1970094-1970294 | hypothetical protein            | 1915619-1915819 | - | 201 |
| 14028S  | STM14_2260     | 378450457 | - | 1973190-1973366 | hypothetical protein            | 1918716-1918892 | - | 177 |
| 14028S  | STM14_2261     | 378450458 | + | 1973229-1973375 | hypothetical protein            | 1918755-1918901 | + | 147 |
| ST474   | STM474_1893    | 379701046 | - | 1920052-1920177 | arsenical pump membrane protein | 1919415-1919540 | - | 126 |
| 14028S  | STM14_2263     | 378450459 | - | 1973981-1974151 | hypothetical protein            | 1919507-1919677 | - | 171 |
| 14028S  | STM14_2264     | 378450460 | + | 1974277-1974393 | tail fiber assembly protein     | 1919803-1919919 | + | 117 |
| 14028S  | pagK           | 378450461 | + | 1974584-1974784 | PagK                            | 1920110-1920310 | + | 201 |
| 14028S  | STM14_2268     | 378450464 | + | 1976235-1976423 | hypothetical protein            | 1921761-1921949 | + | 189 |
| 14028S  | STM14_2270     | 378450466 | + | 1976705-1976878 | hypothetical protein            | 1922231-1922404 | + | 174 |
| 14028S  | STM14_2271     | 378450467 | + | 1976808-1976927 | hypothetical protein            | 1922334-1922453 | + | 120 |
| 14028S  | STM14_2276     | 378450471 | - | 1979312-1979440 | hypothetical protein            | 1924838-1924966 | - | 129 |
| 14028S  | STM14_2277     | 378450472 | - | 1979524-1979643 | putative cytoplasmic protein    | 1925050-1925169 | - | 120 |
| T000240 | STMDT12_C19080 | 378984449 | + | 1972383-1972478 | hypothetical protein            | 1933773-1933868 | + | 96  |
| 14028S  | STM14_2291     | 378450486 | - | 1990827-1990985 | hypothetical protein            | 1936353-1936511 | - | 159 |
| 14028S  | STM14_2293     | 378450488 | + | 1992662-1992778 | hypothetical protein            | 1938188-1938313 | + | 126 |
| 14028S  | STM14_2294     | 378450489 | - | 1992755-1992874 | hypothetical protein            | 1938281-1938400 | - | 120 |
| 14028S  | STM14_2298     | 378450493 | + | 1996367-1996594 | hypothetical protein            | 1941893-1942120 | + | 228 |
| 14028S  | STM14_2305     | 378450500 | + | 2002147-2002269 | hypothetical protein            | 1947673-1947795 | + | 123 |
| 14028S  | STM14_2306     | 378450501 | - | 2002264-2002389 | hypothetical protein            | 1947790-1947915 | - | 126 |
| 14028S  | STM14_2313     | 378450507 | + | 2008446-2008562 | hypothetical protein            | 1953972-1954088 | + | 117 |
| 14028S  | STM14_2321     | 378450515 | + | 2013869-2013985 | hypothetical protein            | 1959395-1959511 | + | 117 |
| 14028S  | STM14_2323     | 378450517 | + | 2015793-2015897 | hypothetical protein            | 1961319-1961423 | + | 105 |
| 14028S  | STM14_2329     | 378450523 | + | 2022930-2023187 | hypothetical protein            | 1968456-1968713 | + | 258 |
| 14028S  | STM14_2339     | 378450533 | - | 2032400-2032531 | hypothetical protein            | 1977926-1978057 | - | 132 |
| 14028S  | STM14_2342     | 378450536 | - | 2033684-2033827 | hypothetical protein            | 1979210-1979353 | - | 144 |
| 14028S  | STM14_2343     | 378450537 | + | 2034145-2034261 | hypothetical protein            | 1979671-1979787 | + | 117 |



|         |                |           |   |                 |                                     |                 |   |     |
|---------|----------------|-----------|---|-----------------|-------------------------------------|-----------------|---|-----|
| 140285  | STM14_2349     | 378450542 | + | 2038156-2038305 | hypothetical protein                | 1983682-1983831 | + | 150 |
| T000240 | STMDT12_C19550 | 378984496 | - | 2022485-2022580 | hypothetical protein                | 1983875-1983970 | - | 96  |
| D23580  | STM14_19262    | 378445334 | - | 2022476-2022533 | hypothetical protein                | 1995896-1995973 | - | 78  |
| 140285  | STM14_2366     | 378450556 | + | 2050620-2050775 | putative inner membrane protein     | 1996145-1996300 | + | 156 |
| 140285  | STM14_2379     | 378450569 | - | 2060568-2060705 | hypothetical protein                | 2006092-2006229 | - | 138 |
| 140285  | STM14_2387     | 378450577 | + | 2066907-2067293 | putative S05 ribosomal protein      | 2012431-2012817 | + | 387 |
| 140285  | STM14_2389     | 378450579 | - | 2067774-2067902 | hypothetical protein                | 2013298-2013426 | - | 129 |
| 140285  | STM14_2409     | 410023192 | - | 2083025-2083210 | putative cytoplasmic protein        | 2028549-2028734 | - | 186 |
| 140285  | STM14_2411     | 378450600 | + | 2084253-2084468 | hypothetical protein                | 2029777-2029992 | + | 216 |
| ST474   | STM474_2026    | 379701174 | + | 2034563-2034694 | hypothetical protein                | 2033924-2034055 | + | 132 |
| 140285  | STM14_2417     | 378450606 | + | 2088843-2088962 | hypothetical protein                | 2034367-2034486 | + | 120 |
| 140285  | STM14_2419     | 378450608 | - | 2090431-2090643 | putative cold-shock protein         | 2035955-2036167 | - | 213 |
| 140285  | STM14_2421     | 378450610 | - | 2091089-2091208 | hypothetical protein                | 2036613-2036732 | - | 120 |
| 140285  | STM14_2425     | 378450614 | - | 2093253-2093495 | hypothetical protein                | 2038777-2039019 | - | 243 |
| 140285  | STM14_2429     | 378450617 | - | 2095348-2095497 | hypothetical protein                | 2040872-2041021 | - | 150 |
| 140285  | STM14_2442     | 378450629 | - | 2106970-2107134 | hypothetical protein                | 2052495-2052659 | - | 165 |
| 140285  | STM14_2451     | 378450638 | - | 2112246-2112428 | hypothetical protein                | 2057771-2057953 | - | 183 |
| 140285  | STM14_2454     | 378450641 | - | 2114790-2115140 | hypothetical protein                | 2060315-2060665 | - | 351 |
| 140285  | STM14_2455     | 378450642 | - | 2115201-2115503 | hypothetical protein                | 2060726-2061028 | - | 303 |
| 140285  | STM14_2456     | 378450643 | - | 2115612-2115710 | hypothetical protein                | 2061137-2061235 | - | 99  |
| 140285  | STM14_2457     | 378450644 | - | 2115723-2116142 | hypothetical protein                | 2061248-2061667 | - | 420 |
| 140285  | STM14_2461     | 378450648 | + | 2117839-2117967 | hypothetical protein                | 2063364-2063492 | + | 129 |
| D23580  | STM14_20121    | 378445417 | + | 2090064-2090498 | phage protein                       | 2063485-2063919 | + | 435 |
| 140285  | STM14_2466     | 378450653 | - | 2121222-2121611 | crossover junction protein          | 2066747-2067136 | - | 390 |
| 140285  | STM14_2468     | 378450655 | - | 2122501-2123025 | putative transcriptional activator  | 2068026-2068550 | - | 525 |
| 140285  | STM14_2470     | 378450657 | - | 2123800-2124024 | hypothetical protein                | 2069325-2069549 | - | 225 |
| 140285  | STM14_2473     | 378450660 | - | 2125758-2125982 | DNA binding protein                 | 2071283-2071507 | - | 225 |
| 140285  | STM14_2478     | 378450665 | + | 2129593-2129823 | hypothetical protein                | 2075118-2075348 | + | 231 |
| 140285  | STM14_2483     | 378450670 | + | 2132377-2132619 | hypothetical protein                | 2077902-2078144 | + | 243 |
| T000240 | STMDT12_C20240 | 378984565 | - | 2079358-2079462 | hypothetical protein                | 2080893-2080997 | - | 105 |
| SL1344  | SL1344_1980    | 378699918 | + | 2082737-2083009 | hypothetical protein                | 2082098-2082370 | + | 273 |
| ST474   | STM474_2085    | 379701227 | + | 2082744-2082878 | hypothetical protein                | 2082105-2082239 | - | 135 |
| ST474   | STM474_2089    | 379701231 | + | 2088148-2088282 | hypothetical protein                | 2087509-2087643 | + | 135 |
| 140285  | STM14_2493     | 378450677 | + | 2142163-2142336 | hypothetical protein                | 2087688-2087861 | + | 174 |
| T000240 | STMDT12_C20320 | 378984573 | + | 2086418-2086567 | hypothetical protein                | 2087953-2088102 | + | 150 |
| 140285  | STM14_2494     | 378450678 | - | 2142487-2142741 | hypothetical protein                | 2088012-2088266 | - | 255 |
| ST474   | STM474_2091    | 379701233 | + | 2088820-2088942 | hypothetical protein                | 2088181-2088303 | + | 123 |
| D23580  | STM14_20421    | 378445447 | + | 2116462-2116623 | hypothetical protein                | 2089883-2090044 | + | 162 |
| 140285  | STM14_2496     | 378450680 | - | 2144508-2144834 | putative cytoplasmic protein        | 2090033-2090359 | - | 327 |
| 140285  | STM14_2497     | 378450681 | - | 2144828-2145214 | hypothetical protein                | 2090353-2090739 | - | 387 |
| 140285  | STM14_2498     | 378450682 | + | 2145540-2145707 | hypothetical protein                | 2091065-2091232 | + | 168 |
| 140285  | STM14_2501     | 378450684 | - | 2147387-2147539 | hypothetical protein                | 2092912-2093064 | - | 153 |
| 140285  | STM14_2524     | 378450706 | - | 2165668-2165799 | hypothetical protein                | 2111193-2111324 | - | 132 |
| 140285  | STM14_2549     | 378450731 | - | 2185570-2185701 | hypothetical protein                | 2131096-2131227 | - | 132 |
| 140285  | STM14_2556     | 378450738 | - | 2192950-2193219 | hypothetical protein                | 2138476-2138745 | - | 270 |
| 140285  | STM14_2558     | 378450740 | - | 2195674-2195796 | hypothetical protein                | 2141200-2141322 | - | 123 |
| 140285  | STM14_2561     | 378450743 | + | 2198729-2198896 | hypothetical protein                | 2144255-2144422 | + | 168 |
| 140285  | STM14_2562     | 378450744 | - | 2198740-2198937 | hypothetical protein                | 2144266-2144463 | - | 198 |
| 140285  | rfbC           | 378450770 | - | 2226670-2227221 | dTDP-4-deoxyrihamnose 3,5 epimerase | 2172196-2172747 | - | 552 |
| 140285  | STM14_2599     | 378450781 | + | 2239941-2240216 | hypothetical protein                | 2185467-2185742 | + | 276 |
| 140285  | STM14_2614     | 378450796 | + | 2254277-2254522 | hypothetical protein                | 2199803-2200048 | + | 246 |
| 140285  | STM14_2619     | 378450801 | - | 2259828-2259998 | hypothetical protein                | 2205354-2205524 | - | 171 |
| 140285  | STM14_2623     | 378450805 | - | 2265633-2265749 | hypothetical protein                | 2211159-2211275 | - | 117 |
| 140285  | STM14_2635     | 378450816 | - | 2282708-2282821 | hypothetical protein                | 2228234-2228347 | - | 114 |
| 140285  | STM14_2638     | 378450818 | - | 2284669-2285004 | putative inner membrane protein     | 2230195-2230530 | - | 336 |
| 140285  | STM14_2639     | 378450819 | + | 2285114-2285233 | hypothetical protein                | 2230640-2230759 | + | 120 |
| 140285  | STM14_2649     | 378450829 | - | 2293497-2293682 | hypothetical protein                | 2239023-2239208 | - | 186 |
| 140285  | STM14_2651     | 378450831 | - | 2294185-2294343 | hypothetical protein                | 2239711-2239869 | - | 159 |
| ST474   | STM474_2254    | 379701393 | + | 2258581-2258763 | hypothetical protein                | 2257944-2258126 | + | 183 |
| 140285  | STM14_2671     | 378450851 | - | 2315124-2315237 | hypothetical protein                | 2260650-2260763 | - | 114 |
| 140285  | STM14_2674     | 378450854 | - | 2317916-2318191 | hypothetical protein                | 2263442-2263717 | - | 276 |
| 140285  | STM14_2676     | 378450856 | + | 2318810-2318917 | hypothetical protein                | 2264336-2264443 | + | 108 |
| 140285  | STM14_2680     | 378450860 | + | 2322009-2322206 | hypothetical protein                | 2267535-2267732 | + | 198 |
| 140285  | STM14_2697     | 378450877 | + | 2338065-2338184 | hypothetical protein                | 2283591-2283710 | + | 120 |
| 140285  | STM14_2701     | 378450881 | + | 2340683-2340847 | hypothetical protein                | 2286209-2286373 | + | 165 |
| 140285  | STM14_2704     | 378450884 | - | 2342649-2342762 | hypothetical protein                | 2288175-2288288 | - | 114 |
| 140285  | STM14_2705     | 378450885 | - | 2342720-2342848 | hypothetical protein                | 2288246-2288374 | - | 129 |
| 140285  | STM14_2706     | 378450886 | + | 2342834-2343067 | hypothetical protein                | 2288360-2288593 | + | 234 |
| 140285  | STM14_2710     | 378450890 | - | 2345635-2345787 | hypothetical protein                | 2291161-2291313 | - | 153 |
| 140285  | STM14_2714     | 378450894 | + | 2349999-2350304 | hypothetical protein                | 2295525-2295830 | + | 306 |
| 140285  | STM14_2716     | 378450896 | - | 2351963-2352097 | hypothetical protein                | 2297489-2297623 | - | 135 |
| 140285  | STM14_2718     | 378450898 | - | 2352991-2353110 | hypothetical protein                | 2298517-2298636 | - | 120 |
| ST474   | STM474_2293    | 379701432 | - | 2300273-2300395 | hypothetical protein                | 2299636-2299758 | - | 123 |
| 140285  | STM14_2724     | 378450904 | + | 2358928-2359059 | hypothetical protein                | 2304454-2304585 | + | 132 |
| UK1     | STMUK_2237     | 378989594 | - | 2307167-2307274 | hypothetical protein                | 2304501-2304608 | - | 108 |
| 140285  | STM14_2725     | 378450905 | + | 2359144-2359266 | hypothetical protein                | 2304670-2304792 | + | 123 |
| 140285  | STM14_2726     | 378450906 | - | 2359149-2359277 | hypothetical protein                | 2304675-2304803 | - | 129 |
| 140285  | STM14_2730     | 378450910 | - | 2361472-2361576 | hypothetical protein                | 2306998-2307102 | - | 105 |
| 140285  | STM14_2731     | 378450911 | - | 2361699-2361953 | hypothetical protein                | 2307225-2307479 | - | 255 |
| 140285  | STM14_2736     | 378450915 | - | 2364975-2365205 | hypothetical protein                | 2310501-2310731 | - | 231 |
| 140285  | STM14_2738     | 378450917 | + | 2365897-2366040 | hypothetical protein                | 2311423-2311566 | + | 144 |
| 140285  | STM14_2750     | 378450929 | - | 2378246-2378392 | hypothetical protein                | 2323773-2323919 | - | 147 |
| 140285  | STM14_2756     | 378450934 | - | 2382514-2382984 | DNA polymerase V subunit            | 2328041-2328511 | - | 471 |
| 140285  | STM14_2757     | 378450935 | + | 2383045-2383335 | virulence protein                   | 2328572-2328862 | + | 291 |
| T000240 | STMDT12_C22520 | 378984793 | - | 2327280-2327405 | hypothetical protein                | 2328817-2328942 | - | 126 |
| 140285  | STM14_2764     | 378450942 | - | 2389094-2389207 | hypothetical protein                | 2334621-2334734 | - | 114 |
| 140285  | STM14_2766     | 410023200 | - | 2390737-2391102 | putative phage antiterminator       | 2336264-2336629 | - | 366 |
| 140285  | STM14_2770     | 378450948 | - | 2394973-2395176 | putative phage tail fiber protein   | 2340500-2340703 | - | 204 |
| 140285  | STM14_2774     | 378450952 | + | 2397715-2397861 | hypothetical protein                | 2343242-2343388 | + | 147 |
| 140285  | napF           | 378450968 | - | 2410707-2411198 | ferredoxin-type protein             | 2356234-2356725 | - | 492 |
| 140285  | STM14_2791     | 378450969 | + | 2411310-2411441 | hypothetical protein                | 2356837-2356968 | + | 132 |
| 140285  | STM14_2798     | 378450976 | + | 2418131-2418256 | hypothetical protein                | 2363658-2363783 | + | 126 |
| 140285  | STM14_2803     | 378450980 | - | 2425164-2425280 | hypothetical protein                | 2370691-2370807 | - | 117 |

|        |                |           |   |                 |                                                 |                 |   |     |
|--------|----------------|-----------|---|-----------------|-------------------------------------------------|-----------------|---|-----|
| 140285 | STM14_2805     | 378450982 | + | 2427980-2428210 | hypothetical protein                            | 2373507-2373737 | + | 231 |
| 140285 | STM14_2806     | 378450983 | + | 2428153-2428293 | hypothetical protein                            | 2373680-2373820 | + | 141 |
| 140285 | STM14_2811     | 378450988 | + | 2432657-2432773 | hypothetical protein                            | 2378184-2378300 | + | 117 |
| 140285 | STM14_2822     | 378450999 | + | 2445948-2446052 | hypothetical protein                            | 2391475-2391579 | + | 105 |
| 140285 | STM14_2823     | 378451000 | + | 2446155-2446358 | hypothetical protein                            | 2391682-2391885 | + | 204 |
| 140285 | STM14_2834     | 378451011 | + | 2455277-2455405 | hypothetical protein                            | 2400804-2400932 | + | 129 |
| ST474  | STM474_2412    | 379701547 | - | 2421293-2421412 | hypothetical protein                            | 2420657-2420776 | - | 120 |
| 140285 | STM14_2854     | 378451030 | - | 2475407-2475529 | hypothetical protein                            | 2420935-2421057 | - | 123 |
| 140285 | STM14_2855     | 378451031 | + | 2475538-2475645 | hypothetical protein                            | 2421066-2421173 | + | 108 |
| 140285 | STM14_2856     | 378451032 | + | 2475654-2475836 | hypothetical protein                            | 2421182-2421364 | + | 183 |
| 140285 | STM14_2870     | 378451046 | + | 2491031-2491153 | hypothetical protein                            | 2436559-2436681 | + | 123 |
| 140285 | STM14_2871     | 378451047 | - | 2491241-2491357 | hypothetical protein                            | 2436769-2436885 | - | 117 |
| 140285 | STM14_2880     | 378451056 | - | 2499179-2499430 | hypothetical protein                            | 2444707-2444958 | - | 252 |
| 140285 | STM14_2881     | 378451057 | + | 2499320-2499454 | hypothetical protein                            | 2444848-2444982 | + | 135 |
| 140285 | STM14_2890     | 378451066 | + | 2508681-2508854 | hypothetical protein                            | 2454209-2454382 | + | 174 |
| 140285 | STM14_2902     | 378451078 | + | 2517875-2518045 | hypothetical protein                            | 2463403-2463573 | + | 171 |
| 140285 | STM14_2911     | 378451087 | - | 2527947-2528102 | hypothetical protein                            | 2473475-2473630 | - | 156 |
| 140285 | STM14_2921     | 378451097 | + | 2537322-2537438 | hypothetical protein                            | 2482850-2482966 | + | 117 |
| 140285 | STM14_2924     | 378451100 | + | 2538467-2538835 | putative cytoplasmic protein                    | 2483995-2484363 | + | 369 |
| 140285 | STM14_2940     | 378451116 | + | 2553683-2553823 | hypothetical protein                            | 2499211-2499351 | + | 141 |
| 140285 | STM14_2941     | 378451117 | - | 2553820-2553948 | hypothetical protein                            | 2499348-2499476 | - | 129 |
| T00240 | STMDT12_C24200 | 378984961 | + | 2507125-2507337 | hypothetical protein                            | 2508662-2508874 | + | 213 |
| 140285 | STM14_2952     | 378451127 | - | 2565752-2565865 | hypothetical protein                            | 2511280-2511393 | - | 114 |
| 140285 | STM14_2955     | 378451130 | - | 2569137-2569283 | hypothetical protein                            | 2514665-2514811 | - | 147 |
| 140285 | STM14_2959     | 378451134 | + | 2573587-2573775 | hypothetical protein                            | 2519115-2519303 | + | 189 |
| 140285 | STM14_2986     | 378451155 | + | 2595762-2595923 | hypothetical protein                            | 2541291-2541452 | + | 162 |
| 140285 | STM14_2987     | 410023203 | - | 2595873-2595998 | hypothetical protein                            | 2541402-2541527 | - | 126 |
| 140285 | STM14_2988     | 378451157 | + | 2595966-2596094 | hypothetical protein                            | 2541495-2541623 | + | 129 |
| 140285 | STM14_3032     | 378451201 | + | 2633812-2634012 | hypothetical protein                            | 2579341-2579541 | + | 201 |
| 140285 | STM14_3036     | 378451205 | - | 2637342-2637476 | hypothetical protein                            | 2582871-2583005 | - | 135 |
| 140285 | STM14_3043     | 378451212 | - | 2645096-2645227 | hypothetical protein                            | 2590625-2590756 | - | 132 |
| 140285 | STM14_3063     | 378451232 | - | 2664349-2664552 | hypothetical protein                            | 2609878-2610081 | - | 204 |
| 140285 | STM14_3069     | 378451238 | - | 2672447-2672584 | putative cytoplasmic protein                    | 2617975-2618112 | - | 138 |
| 140285 | STM14_3070     | 378451239 | - | 2672655-2672915 | putative inner membrane protein                 | 2618183-2618443 | - | 261 |
| 140285 | STM14_3072     | 378451241 | - | 2673033-2673269 | putative inner membrane protein                 | 2618561-2618797 | - | 237 |
| T00240 | STMDT12_C25240 | 378985065 | + | 2617191-2617382 | putative cytoplasmic protein                    | 2618847-2619038 | + | 192 |
| 140285 | STM14_3073     | 410023207 | + | 2673510-2673824 | putative cytoplasmic protein                    | 2619038-2619352 | + | 315 |
| 140285 | STM14_3074     | 378451243 | - | 2673844-2674200 | putative transposase                            | 2619372-2619728 | - | 357 |
| 140285 | STM14_3079     | 378451248 | + | 2685671-2685784 | hypothetical protein                            | 2631199-2631312 | + | 114 |
| 140285 | STM14_3080     | 378451249 | + | 2685675-2685857 | hypothetical protein                            | 2631203-2631385 | + | 183 |
| 140285 | STM14_3081     | 378451250 | - | 2685854-2685967 | hypothetical protein                            | 2631382-2631495 | - | 114 |
| ST474  | STM474_2618    | 379701745 | + | 2646222-2646344 | hypothetical protein                            | 2645586-2645708 | + | 123 |
| 140285 | STM14_3086     | 378451254 | + | 2702354-2702470 | hypothetical protein                            | 2647882-2647998 | + | 117 |
| 140285 | STM14_3087     | 378451255 | - | 2702529-2702864 | hypothetical protein                            | 2648057-2648212 | - | 156 |
| 140285 | ylfJ           | 378451256 | - | 2702699-2702920 | putative cytoplasmic protein                    | 2648227-2648448 | - | 222 |
| 140285 | STM14_3090     | 378451258 | + | 2704480-2704581 | hypothetical protein                            | 2650008-2650109 | + | 102 |
| 140285 | STM14_3096     | 378451264 | - | 2710094-2710216 | type IV pilus biogenesis/stability protein PilW | 2655622-2655744 | - | 123 |
| 140285 | STM14_3099     | 378451267 | + | 2712052-2712147 | hypothetical protein                            | 2657580-2657675 | + | 96  |
| 140285 | STM14_3107     | 378451275 | - | 2725280-2725504 | hypothetical protein                            | 2670808-2671032 | - | 225 |
| ST474  | STM474_2636    | 379701763 | + | 2671480-2671593 | hypothetical protein                            | 2670844-2670957 | + | 114 |
| 140285 | STM14_3119     | 378451287 | + | 2734356-2734475 | hypothetical protein                            | 2679886-2680005 | + | 120 |
| 140285 | STM14_3122     | 378451290 | + | 2735856-2735978 | hypothetical protein                            | 2681386-2681508 | + | 123 |
| 140285 | STM14_3123     | 378451291 | - | 2735883-2735993 | hypothetical protein                            | 2681413-2681523 | - | 111 |
| 140285 | STM14_3134     | 378451302 | - | 2746625-2746771 | hypothetical protein                            | 2692155-2692301 | - | 147 |
| 140285 | STM14_3144     | 378451312 | + | 2759420-2759548 | hypothetical protein                            | 2704950-2705078 | + | 129 |
| 140285 | STM14_3146     | 378451314 | + | 2763716-2763949 | hypothetical protein                            | 2709246-2709479 | + | 234 |
| 140285 | STM14_3165     | 378451333 | - | 2782226-2782354 | hypothetical protein                            | 2727757-2727885 | - | 129 |
| T00240 | STMDT12_C26070 | 378985147 | + | 2726268-2726375 | hypothetical protein                            | 2727926-2728033 | + | 108 |
| 140285 | STM14_3166     | 378451334 | + | 2782885-2783430 | transposase-like protein                        | 2728422-2728967 | + | 546 |
| ST474  | STM474_2692    | 379701819 | - | 2729509-2729628 | integrase, catalytic region                     | 2728888-2729007 | - | 120 |
| SL1344 | SL1344_2548    | 378700486 | - | 2730253-2730318 | bacteriophage protein                           | 2729632-2729697 | - | 66  |
| D23580 | STM14_26031    | 378446002 | - | 2757050-2757262 | putative prophage protein                       | 2729760-2729972 | - | 213 |
| 140285 | STM14_3167     | 378451335 | + | 2784542-2784769 | PhaK-like protein                               | 2730079-2730306 | + | 228 |
| 140285 | STM14_3171     | 410023208 | - | 2788681-2788923 | hypothetical protein                            | 2734218-2734460 | - | 243 |
| 140285 | STM14_1473     | 378449695 | - | 1321447-1322052 | hypothetical protein                            | 2738615-2739220 | + | 606 |
| 140285 | STM14_1471     | 378449693 | + | 1320418-1320747 | phage tail component M-like protein             | 2739920-2740249 | + | 330 |
| 140285 | STM14_1466     | 378449688 | + | 1315412-1315813 | phage minor tail protein U                      | 2744854-2745255 | + | 402 |
| 140285 | STM14_1463     | 410023174 | + | 1313135-1313518 | minor capsid protein Fil                        | 2747149-2747532 | - | 384 |
| 140285 | STM14_3199     | 378451366 | - | 2812905-2813093 | hypothetical protein                            | 2758436-2758624 | - | 189 |
| 140285 | STM14_3202     | 378451368 | - | 2814160-2814285 | hypothetical protein                            | 2759691-2759816 | - | 126 |
| 140285 | STM14_3204     | 378451370 | - | 2815110-2815250 | hypothetical protein                            | 2760641-2760781 | - | 141 |
| 140285 | STM14_3206     | 378451372 | - | 2815861-2816061 | hypothetical protein                            | 2761392-2761592 | - | 201 |
| 140285 | STM14_1440     | 378449663 | + | 1298794-1299042 | putative bacteriophage protein                  | 2762235-2762483 | - | 249 |
| 140285 | STM14_3209     | 378451375 | + | 2816906-2817040 | prophage Dint                                   | 2762437-2762571 | + | 135 |
| 140285 | STM14_3211     | 378451377 | - | 2817545-2818177 | hypothetical protein                            | 2763076-2763708 | - | 633 |
| 140285 | STM14_3213     | 378451379 | - | 2818997-2819692 | phage replication protein P                     | 2764528-2765223 | - | 696 |
| 140285 | STM14_3215     | 378451381 | - | 2820665-2821039 | prophage ci protein                             | 2766196-2766570 | - | 375 |
| 140285 | STM14_3216     | 378451382 | - | 2820999-2821259 | hypothetical protein                            | 2766530-2766790 | - | 261 |
| 140285 | STM14_3217     | 410023211 | + | 2821341-2821736 | putative regulator                              | 2766872-2767267 | + | 396 |
| 140285 | STM14_3219     | 410023212 | + | 2822627-2823013 | hypothetical protein                            | 2768158-2768544 | + | 387 |
| 140285 | STM14_3220     | 378451386 | + | 2823013-2823675 | hypothetical protein                            | 2768544-2769206 | + | 663 |
| 140285 | STM14_3223     | 378451389 | + | 2824312-2824662 | hypothetical protein                            | 2769844-2770194 | + | 351 |
| 140285 | STM14_3226     | 378451392 | + | 2828879-2829118 | putative cytoplasmic protein                    | 2774411-2774650 | + | 240 |
| 140285 | STM14_3227     | 378451393 | + | 2829159-2829443 | excisionase-like protein                        | 2774691-2774975 | + | 285 |
| 140285 | STM14_3229     | 378451395 | + | 2830868-2831005 | hypothetical protein                            | 2776400-2776537 | + | 138 |
| 140285 | STM14_3230     | 378451396 | - | 2831002-2831118 | hypothetical protein                            | 2776534-2776650 | + | 117 |
| 140285 | STM14_3235     | 378451401 | - | 2833834-2833998 | hypothetical protein                            | 2779366-2779530 | - | 165 |
| 140285 | STM14_3236     | 378451402 | - | 2833998-2834177 | hypothetical protein                            | 2779530-2779709 | - | 180 |
| 140285 | STM14_3239     | 378451405 | - | 2836525-2836725 | putative methyltransferase                      | 2782057-2782257 | - | 201 |
| 140285 | STM14_3249     | 378451415 | + | 2846371-2846505 | hypothetical protein                            | 2791903-2792037 | + | 135 |
| 140285 | STM14_3259     | 378451420 | + | 2855709-2855837 | hypothetical protein                            | 2801158-2801286 | + | 129 |
| 140285 | STM14_3260     | 378451421 | + | 2855915-2856031 | hypothetical protein                            | 2801364-2801480 | + | 117 |
| 140285 | STM14_3267     | 378451427 | + | 2861933-2862097 | hypothetical protein                            | 2807382-2807546 | + | 165 |

|         |                |           |   |                 |                                                               |                 |   |     |
|---------|----------------|-----------|---|-----------------|---------------------------------------------------------------|-----------------|---|-----|
| 140285  | STM14_3272     | 378451432 | + | 2866577-2866735 | hypothetical protein                                          | 2812026-2812184 | + | 159 |
| 140285  | STM14_3273     | 378451433 | - | 2866637-2866750 | hypothetical protein                                          | 2812086-2812199 | - | 114 |
| SL1344  | SL1344_2632    | 378700571 | - | 2816456-2816794 | hypothetical protein                                          | 2815409-2815747 | - | 339 |
| SL1344  | SL1344_2640    | 378700579 | + | 2819701-2820222 | bacteriophage-like protein                                    | 2818654-2819175 | + | 522 |
| SL1344  | gpb            | 378700584 | + | 2825697-2825915 | bacteriophage late control gene                               | 2824650-2824868 | + | 219 |
| 140285  | STM14_3280     | 378451440 | - | 2870862-2871008 | hypothetical protein                                          | 2827086-2827232 | - | 147 |
| 140285  | STM14_3282     | 378451442 | + | 2872506-2872700 | putative cytochrome c-type biogenesis protein (heme exporter) | 2828730-2828924 | + | 195 |
| UK1     | STMUK_2717     | 378990059 | - | 2824344-2824538 | putative cytoplasmic protein                                  | 2832314-2832508 | - | 195 |
| 140285  | STM14_3291     | 378451450 | - | 2879362-2879469 | hypothetical protein                                          | 2835585-2835692 | - | 108 |
| 140285  | STM14_3295     | 378451454 | + | 2881056-2881160 | hypothetical protein                                          | 2837279-2837383 | + | 105 |
| 140285  | STM14_3296     | 378451455 | - | 2881388-2881540 | hypothetical protein                                          | 2837611-2837763 | - | 153 |
| ST474   | STM474_2816    | 379701937 | + | 2855546-2855689 | hypothetical protein                                          | 2854498-2854641 | + | 144 |
| LT2     | STM2694        | 16766007  | - | 2844427-2844645 | late control-like protein                                     | 2854568-2854786 | - | 219 |
| SL1344  | SL1344_2697    | 378700636 | - | 2879070-2879447 | bacteriophage protein                                         | 2877812-2878189 | - | 378 |
| SL1344  | SL1344_2700    | 378700639 | - | 2880885-2881073 | bacteriophage protein                                         | 2879627-2879815 | - | 189 |
| ST474   | STM474_2853    | 379701973 | - | 2881219-2881347 | hypothetical protein                                          | 2879961-2880089 | - | 129 |
| SL1344  | SL1344_2703    | 378700642 | - | 2884485-2884712 | bacteriophage protein                                         | 2883227-2883454 | - | 228 |
| SL1344  | SL1344_2705    | 378700644 | - | 2885312-2885608 | bacteriophage protein                                         | 2884054-2884350 | - | 297 |
| ST474   | STM474_2858    | 379701978 | + | 2885673-2885810 | hypothetical protein                                          | 2884415-2884552 | + | 138 |
| SL1344  | cl             | 378700647 | + | 2886920-2887495 | bacteriophage repressor protein cl                            | 2885662-2886237 | + | 576 |
| SL1344  | SL1344_2714    | 378700652 | - | 2892957-2893190 | hypothetical protein                                          | 2891699-2891932 | - | 234 |
| SL1344  | SL1344_2717    | 378700655 | - | 2895025-2895267 | bacteriophage gene regulatory protein                         | 2893767-2894009 | - | 243 |
| ST474   | STM474_2868    | 379701988 | + | 2895927-2896202 | hypothetical protein                                          | 2894669-2894944 | + | 276 |
| ST474   | STM474_2869    | 379701989 | + | 2896539-2896805 | phage DNA binding protein                                     | 2895281-2895547 | + | 267 |
| SL1344  | SL1344_2719    | 378700657 | + | 2896802-2897353 | bacteriophage protein                                         | 2895544-2896095 | + | 552 |
| 140285  | STM14_3309     | 378451467 | + | 2905915-2906040 | hypothetical protein                                          | 2906997-2907122 | + | 126 |
| 140285  | STM14_3313     | 378451471 | - | 2908598-2908954 | putative transcriptional regulator                            | 2909680-2910036 | - | 357 |
| 140285  | STM14_3324     | 378451481 | - | 2917712-2917867 | hypothetical protein                                          | 2918794-2918949 | - | 156 |
| 140285  | STM14_3326     | 378451483 | - | 2919626-2919739 | hypothetical protein                                          | 2920708-2920821 | - | 114 |
| ST474   | STM474_2898    | 379702018 | - | 2927700-2927858 | hypothetical protein                                          | 2926441-2926599 | - | 159 |
| 140285  | STM14_3333     | 378451489 | - | 2928020-2928658 | putative cytoplasmic protein                                  | 2929102-2929740 | - | 639 |
| T000240 | STMDT12_C28220 | 378985362 | - | 2935935-2936111 | hypothetical protein                                          | 2933686-2933862 | - | 177 |
| 140285  | STM14_3340     | 378451496 | + | 2935806-2935976 | hypothetical protein                                          | 2936888-2937058 | + | 171 |
| 140285  | STM14_3341     | 378451497 | - | 2936002-2936229 | hypothetical protein                                          | 2937084-2937311 | - | 228 |
| 140285  | STM14_3342     | 378451498 | - | 2936297-2936449 | hypothetical protein                                          | 2937379-2937531 | - | 153 |
| 140285  | STM14_3343     | 378451499 | + | 2936325-2936507 | hypothetical protein                                          | 2937407-2937589 | + | 183 |
| D23580  | STM14_27451    | 378446140 | + | 2919280-2919612 | putative inner membrane protein                               | 2947612-2947944 | + | 333 |
| 140285  | STM14_3351     | 378451506 | + | 2948161-2948499 | hypothetical protein                                          | 2949243-2949581 | + | 339 |
| 140285  | STM14_3353     | 378451508 | + | 2949636-2949833 | hypothetical protein                                          | 2950717-2950914 | + | 198 |
| 140285  | STM14_3355     | 378451510 | + | 2950805-2950957 | hypothetical protein                                          | 2951886-2952038 | - | 153 |
| 140285  | STM14_3356     | 378451511 | + | 2951059-2951226 | hypothetical protein                                          | 2952140-2952307 | + | 168 |
| 140285  | STM14_3357     | 378451512 | + | 2951242-2951355 | hypothetical protein                                          | 2952323-2952436 | + | 114 |
| 140285  | STM14_3364     | 378451519 | + | 2957937-2958050 | hypothetical protein                                          | 2959018-2959131 | + | 114 |
| 140285  | STM14_3372     | 378451527 | + | 2965822-2965938 | hypothetical protein                                          | 2966903-2967019 | + | 117 |
| 140285  | STM14_3376     | 378451531 | + | 2967191-2967370 | hypothetical protein                                          | 2968272-2968451 | + | 180 |
| 140285  | STM14_3378     | 378451533 | + | 2968220-2968345 | hypothetical protein                                          | 2969301-2969426 | + | 126 |
| 140285  | STM14_3379     | 378451534 | + | 2968355-2968534 | hypothetical protein                                          | 2969436-2969615 | + | 180 |
| 140285  | STM14_3382     | 378451537 | - | 2969378-2969494 | hypothetical protein                                          | 2970459-2970575 | - | 117 |
| 140285  | STM14_3386     | 378451541 | + | 2971817-2971993 | hypothetical protein                                          | 2972898-2973073 | + | 177 |
| 140285  | STM14_3394     | 378451549 | + | 2979522-2979632 | hypothetical protein                                          | 2980603-2980713 | + | 111 |
| 140285  | STM14_3396     | 378451551 | - | 2981060-2981167 | hypothetical protein                                          | 2982141-2982248 | - | 108 |
| 140285  | STM14_3398     | 378451553 | - | 2981900-2982022 | hypothetical protein                                          | 2982981-2983103 | - | 123 |
| 140285  | STM14_3411     | 378451561 | + | 2991063-2991173 | hypothetical protein                                          | 2992144-2992254 | + | 111 |
| 140285  | STM14_3414     | 378451564 | + | 2994186-2994350 | hypothetical protein                                          | 2995267-2995431 | + | 165 |
| 140285  | STM14_3415     | 378451565 | - | 2994269-2994475 | hypothetical protein                                          | 2995350-2995556 | - | 207 |
| 140285  | STM14_3419     | 378451569 | + | 2996927-2997172 | hypothetical protein                                          | 2998008-2998253 | + | 246 |
| 140285  | STM14_3421     | 378451571 | + | 2998326-2998466 | hypothetical protein                                          | 2999407-2999547 | + | 141 |
| 140285  | STM14_3427     | 378451577 | - | 3001727-3001867 | hypothetical protein                                          | 3002808-3002948 | - | 141 |
| 140285  | STM14_3433     | 378451583 | - | 3007751-3007963 | hydrogenase maturation protein                                | 3008832-3009044 | - | 213 |
| 140285  | STM14_3435     | 378451585 | - | 3010214-3010348 | hypothetical protein                                          | 3011295-3011429 | - | 135 |
| 140285  | STM14_3447     | 378451597 | - | 3019238-3019342 | hypothetical protein                                          | 3020319-3020423 | - | 105 |
| 140285  | STM14_3449     | 378451599 | + | 3019869-3020072 | hypothetical protein                                          | 3020950-3021153 | + | 204 |
| 140285  | STM14_3457     | 378451607 | + | 3026426-3026551 | hypothetical protein                                          | 3027507-3027632 | + | 126 |
| 140285  | STM14_3464     | 378451614 | + | 3032212-3032319 | hypothetical protein                                          | 3033291-3033398 | + | 108 |
| 140285  | STM14_3466     | 378451616 | - | 3033296-3033403 | hypothetical protein                                          | 3034375-3034482 | - | 108 |
| 140285  | STM14_3479     | 378451629 | - | 3044345-3044605 | putative cytoplasmic protein                                  | 3045424-3045684 | - | 261 |
| 140285  | STM14_3500     | 378451650 | + | 3065500-3065949 | putative cytoplasmic protein                                  | 3066579-3067028 | + | 450 |
| 140285  | STM14_3501     | 378451651 | + | 3065934-3066281 | putative cytoplasmic protein                                  | 3067013-3067360 | + | 348 |
| 140285  | STM14_3502     | 378451652 | - | 3066393-3066497 | hypothetical protein                                          | 3067472-3067576 | - | 105 |
| D23580  | STM14_28661    | 378446261 | + | 3039872-3039979 | pathogenicity island 1 protein                                | 3068200-3068307 | + | 108 |
| 140285  | STM14_3504     | 378451654 | + | 3067340-3067483 | hypothetical protein                                          | 3068419-3068562 | + | 144 |
| 140285  | STM14_3508     | 378451657 | + | 3068687-3068806 | hypothetical protein                                          | 3069766-3069885 | + | 120 |
| 140285  | STM14_3510     | 378451659 | - | 3069836-3070357 | putative cytoplasmic protein                                  | 3070915-3071436 | - | 522 |
| 140285  | STM14_3528     | 378451677 | + | 3087981-3088118 | hypothetical protein                                          | 3089060-3089197 | + | 138 |
| 140285  | STM14_3535     | 378451684 | - | 3092010-3092120 | hypothetical protein                                          | 3093089-3093199 | - | 111 |
| ST474   | STM474_3077    | 379702190 | + | 3100048-3100164 | hypothetical protein                                          | 3099213-3099329 | + | 117 |
| 140285  | STM14_3549     | 378451698 | - | 3106978-3107112 | hypothetical protein                                          | 3107979-3108113 | - | 135 |
| 140285  | STM14_3555     | 378451704 | - | 3113560-3114357 | putative metal-dependent hydrolase                            | 3114561-3115358 | - | 798 |
| ST474   | STM474_3093    | 379702206 | + | 3116333-3116446 | hypothetical protein                                          | 3115498-3115611 | + | 114 |
| 140285  | STM14_3560     | 378451709 | + | 3121321-3121458 | hypothetical protein                                          | 3122078-3122215 | + | 138 |
| 140285  | STM14_3561     | 378451710 | + | 3121826-3121978 | putative fimbrial subunit                                     | 3122582-3122734 | + | 153 |
| 140285  | STM14_3571     | 378451720 | + | 3134509-3134736 | hypothetical protein                                          | 3135265-3135492 | + | 228 |
| 140285  | STM14_3579     | 378451727 | + | 3140022-3140165 | hypothetical protein                                          | 3140777-3140920 | + | 144 |
| 140285  | STM14_3580     | 378451728 | + | 3140255-3140359 | hypothetical protein                                          | 3141010-3141114 | + | 105 |
| 140285  | STM14_3583     | 378451731 | - | 3143293-3143478 | hypothetical protein                                          | 3144048-3144233 | - | 186 |
| 140285  | STM14_3585     | 378451733 | - | 3144205-3144342 | L-1,2-propanediol oxidoreductase                              | 3144960-3145097 | - | 138 |
| 140285  | STM14_3588     | 378451736 | - | 3146280-3146447 | hypothetical protein                                          | 3147035-3147202 | - | 168 |
| 140285  | STM14_3600     | 378451747 | + | 3157563-3157685 | hypothetical protein                                          | 3158318-3158440 | + | 123 |
| 140285  | STM14_3616     | 378451761 | + | 3177651-3177833 | hypothetical protein                                          | 3178406-3178588 | + | 183 |
| 140285  | STM14_3619     | 378451764 | - | 3179499-3179657 | hypothetical protein                                          | 3180254-3180412 | - | 159 |
| 140285  | STM14_3622     | 378451767 | - | 3182548-3182661 | hypothetical protein                                          | 3183303-3183416 | - | 114 |
| 140285  | STM14_3623     | 378451768 | + | 3182641-3182757 | hypothetical protein                                          | 3183396-3183512 | + | 117 |
| 140285  | STM14_3624     | 378451769 | - | 3182858-3183004 | hypothetical protein                                          | 3183613-3183759 | - | 147 |

|        |                |           |   |                 |                                       |                 |   |     |
|--------|----------------|-----------|---|-----------------|---------------------------------------|-----------------|---|-----|
| 140285 | STM14_3625     | 378451770 | + | 3183029-3183154 | hypothetical protein                  | 3183784-3183909 | + | 126 |
| 140285 | STM14_3626     | 378451771 | - | 3183053-3183160 | hypothetical protein                  | 3183808-3183915 | - | 108 |
| 140285 | STM14_3628     | 378451773 | + | 3183985-3184095 | hypothetical protein                  | 3184740-3184850 | + | 111 |
| 140285 | STM14_3631     | 378451776 | + | 3185172-3185342 | hypothetical protein                  | 3185927-3186097 | + | 171 |
| D23580 | STMMW_29721    | 378446366 | - | 3162322-3162468 | hypothetical protein                  | 3190876-3191022 | - | 147 |
| 140285 | STM14_3635     | 378451780 | - | 3190309-3190434 | hypothetical protein                  | 3191064-3191189 | - | 126 |
| 140285 | STM14_3642     | 378451787 | - | 3197131-3197247 | hypothetical protein                  | 3197886-3198002 | - | 117 |
| 140285 | STM14_3645     | 378451790 | - | 3199028-3199198 | hypothetical protein                  | 3199783-3199953 | - | 171 |
| 140285 | STM14_3649     | 378451794 | + | 3202193-3202315 | hypothetical protein                  | 3202948-3203070 | + | 123 |
| 140285 | STM14_3658     | 378451803 | + | 3210549-3210968 | hypothetical protein                  | 3211232-3211651 | + | 420 |
| 140285 | STM14_3661     | 378451806 | - | 3212953-3213489 | Ail/OmpX-like protein                 | 3213636-3214172 | - | 537 |
| 140285 | STM14_3662     | 378451807 | - | 3213534-3213719 | hypothetical protein                  | 3214217-3214402 | - | 186 |
| 140285 | STM14_3664     | 378451809 | - | 3214693-3215070 | putative virulence-associated protein | 3215376-3215753 | - | 378 |
| 140285 | STM14_3666     | 378451810 | - | 3215425-3215670 | hypothetical protein                  | 3216108-3216353 | - | 246 |
| T00240 | STMDT12_C30880 | 378985628 | + | 3219618-3219734 | hypothetical protein                  | 3216177-3216293 | + | 117 |
| 140285 | STM14_3670     | 378451813 | + | 3217519-3217686 | hypothetical protein                  | 3218202-3218369 | + | 168 |
| 140285 | STM14_3680     | 378451823 | + | 3225806-3226042 | hypothetical protein                  | 3226489-3226725 | + | 237 |
| 140285 | STM14_3685     | 378451828 | - | 3229927-3230280 | putative outer membrane protein       | 3230610-3231503 | - | 894 |
| 140285 | STM14_3686     | 378451829 | - | 3230904-3231050 | immunoglobulin VH domain protein      | 3231587-3231733 | - | 147 |
| 140285 | STM14_3690     | 378451833 | + | 3235813-3235968 | hypothetical protein                  | 3236496-3236651 | + | 156 |
| 140285 | STM14_3691     | 378451834 | + | 3236175-3236279 | hypothetical protein                  | 3236858-3236962 | + | 105 |
| 140285 | STM14_3693     | 378451836 | + | 3237457-3237624 | hypothetical protein                  | 3238140-3238307 | + | 168 |
| 140285 | STM14_3700     | 378451843 | + | 3243685-3243795 | hypothetical protein                  | 3244368-3244478 | + | 111 |
| 140285 | STM14_3702     | 378451845 | + | 3244595-3244732 | hypothetical protein                  | 3245278-3245415 | + | 138 |
| 140285 | STM14_3704     | 378451847 | + | 3245634-3245885 | hypothetical protein                  | 3246317-3246568 | + | 252 |
| 140285 | STM14_3711     | 378451854 | + | 3252233-3252433 | hypothetical protein                  | 3252916-3253116 | + | 201 |
| 140285 | STM14_3718     | 378451861 | + | 3257540-3257698 | hypothetical protein                  | 3258223-3258381 | + | 159 |
| 140285 | STM14_3722     | 378451865 | + | 3260720-3260824 | hypothetical protein                  | 3261403-3261507 | + | 105 |
| ST474  | STM474_3231    | 379702341 | + | 3267369-3267485 | putative racemase                     | 3266671-3266587 | + | 117 |
| UK1    | STMUK_3076     | 378990408 | + | 3217903-3218067 | putative cytoplasmic protein          | 3270981-3271145 | + | 165 |
| 140285 | yggD           | 378451874 | - | 3270459-3270758 | putative inner membrane protein       | 3271142-3271441 | - | 300 |
| 140285 | STM14_3734     | 378451876 | - | 3271996-3272124 | hypothetical protein                  | 3272679-3272804 | - | 126 |
| 140285 | STM14_3751     | 378451893 | - | 3285668-3285820 | hypothetical protein                  | 3286351-3286503 | - | 153 |
| 140285 | STM14_3757     | 378451899 | - | 3289138-3289263 | hypothetical protein                  | 3289821-3289946 | - | 126 |
| 140285 | STM14_3759     | 378451901 | - | 3290425-3290550 | hypothetical protein                  | 3291108-3291233 | - | 126 |
| 140285 | STM14_3762     | 378451903 | - | 3293235-3293459 | hypothetical protein                  | 3294787-3295011 | - | 225 |
| 140285 | STM14_3763     | 378451904 | + | 3293413-3293547 | hypothetical protein                  | 3294965-3295099 | + | 135 |
| 140285 | STM14_3766     | 378451906 | - | 3294633-3295067 | putative lactoylglutathione lyase     | 3296185-3296619 | - | 435 |
| 140285 | STM14_3773     | 378451913 | - | 3301831-3301965 | hypothetical protein                  | 3303383-3303517 | - | 135 |
| 140285 | STM14_3774     | 378451914 | + | 3302110-3302214 | hypothetical protein                  | 3303662-3303766 | + | 105 |
| 140285 | STM14_3778     | 378451918 | - | 3305157-3305300 | hypothetical protein                  | 3306709-3306852 | - | 144 |
| 140285 | STM14_3779     | 378451919 | - | 3305240-3305395 | putative cytoplasmic protein          | 3306792-3306947 | - | 156 |
| 140285 | STM14_3783     | 378451923 | + | 3308724-3308864 | hypothetical protein                  | 3310276-3310416 | + | 141 |
| T00240 | STMDT12_C31860 | 378985726 | + | 3314720-3314875 | hypothetical protein                  | 3311261-3311416 | + | 156 |
| 140285 | STM14_3786     | 378451926 | + | 3310018-3310173 | hypothetical protein                  | 3311570-3311725 | + | 156 |
| 140285 | STM14_3789     | 378451928 | + | 3312290-3312427 | hypothetical protein                  | 3313844-3313981 | + | 138 |
| 140285 | STM14_3790     | 378451929 | - | 3312496-3312606 | hypothetical protein                  | 3314050-3314160 | - | 111 |
| 140285 | STM14_3792     | 378451931 | + | 3314050-3314181 | hypothetical protein                  | 3315604-3315735 | + | 132 |
| 140285 | STM14_3793     | 378451932 | + | 3314188-3314334 | hypothetical protein                  | 3315742-3315888 | - | 147 |
| 140285 | STM14_3794     | 378451933 | + | 3314216-3314410 | hypothetical protein                  | 3315770-3315964 | + | 195 |
| 140285 | STM14_3798     | 378451937 | + | 3318584-3318703 | hypothetical protein                  | 3320138-3320257 | + | 120 |
| 140285 | STM14_3800     | 378451939 | - | 3319990-3320106 | hypothetical protein                  | 3321544-3321660 | - | 117 |
| 140285 | STM14_3801     | 378451940 | + | 3320290-3320487 | hypothetical protein                  | 3321844-3322041 | + | 198 |
| 140285 | STM14_3803     | 378451942 | - | 3322464-3322571 | hypothetical protein                  | 3324018-3324125 | - | 108 |
| ST474  | STM474_3301    | 379702409 | - | 3334473-3334658 | hypothetical protein                  | 3333575-3333760 | - | 186 |
| 140285 | STM14_3815     | 378451954 | + | 3332051-3332179 | hypothetical protein                  | 3333605-3333733 | + | 129 |
| 140285 | STM14_3826     | 378451965 | - | 3338987-3339136 | putative inner membrane protein       | 3340541-3340690 | - | 150 |
| 140285 | STM14_3830     | 378451969 | + | 3342234-3342434 | hypothetical protein                  | 3343788-3343988 | + | 201 |
| 140285 | STM14_3833     | 378451972 | - | 3344492-3344629 | hypothetical protein                  | 3346046-3346183 | - | 138 |
| 140285 | STM14_3834     | 378451973 | + | 3344530-3344640 | hypothetical protein                  | 3346084-3346194 | + | 111 |
| ST474  | STM474_3318    | 379702426 | - | 3348584-3348700 | hypothetical protein                  | 3347686-3347802 | - | 117 |
| 140285 | STM14_3837     | 378451976 | + | 3346625-3346789 | hypothetical protein                  | 3348179-3348343 | + | 165 |
| 140285 | STM14_3838     | 378451977 | - | 3346793-3346924 | hypothetical protein                  | 3348347-3348478 | - | 132 |
| 140285 | STM14_3840     | 378451979 | - | 3349441-3349545 | hypothetical protein                  | 3350995-3351099 | - | 105 |
| 140285 | STM14_3851     | 378451990 | + | 3361049-3361165 | hypothetical protein                  | 3362603-3362719 | + | 117 |
| ST474  | STM474_3334    | 379702442 | - | 3364546-3364662 | hypothetical protein                  | 3363648-3363764 | - | 117 |
| 140285 | STM14_3860     | 378451999 | + | 3368291-3368398 | hypothetical protein                  | 3369845-3369952 | + | 108 |
| 140285 | STM14_3865     | 378452004 | - | 3372178-3372354 | hypothetical protein                  | 3373732-3373908 | - | 177 |
| T00240 | STMDT12_C32520 | 378985792 | + | 3381047-3381148 | hypothetical protein                  | 3377590-3377691 | + | 102 |
| 140285 | STM14_3872     | 378452011 | - | 3377873-3378022 | hypothetical protein                  | 3379427-3379576 | - | 150 |
| 140285 | STM14_3875     | 378452014 | + | 3380454-3380651 | hypothetical protein                  | 3382008-3382205 | + | 198 |
| 140285 | STM14_3884     | 378452023 | + | 3390891-3391163 | hypothetical protein                  | 3392444-3392716 | + | 273 |
| 140285 | STM14_3895     | 378452033 | + | 3402540-3402695 | hypothetical protein                  | 3404093-3404248 | + | 156 |
| 140285 | STM14_3901     | 378452039 | - | 3408358-3408459 | hypothetical protein                  | 3409911-3410012 | - | 102 |
| 140285 | STM14_3904     | 378452042 | + | 3410298-3410435 | hypothetical protein                  | 3411851-3411988 | + | 138 |
| 140285 | STM14_3907     | 378452045 | - | 3412994-3413194 | hypothetical protein                  | 3414546-3414746 | - | 201 |
| 140285 | yqjD           | 378452049 | + | 3415051-3415356 | putative inner membrane protein       | 3416603-3416908 | + | 306 |
| 140285 | yhaL           | 378452057 | + | 3419991-3420155 | putative cytoplasmic protein          | 3421543-3421707 | + | 165 |
| ST474  | STM474_3403    | 379702507 | + | 3435178-3435297 | hypothetical protein                  | 3434278-3434397 | + | 120 |
| D23580 | STMMW_32461    | 378446633 | + | 3437229-3437615 | hypothetical protein                  | 3434610-3434996 | + | 387 |
| 140285 | STM14_3932     | 378452069 | - | 3436508-3436648 | hypothetical protein                  | 3438060-3438200 | - | 141 |
| 140285 | STM14_3933     | 378452070 | + | 3436575-3436694 | hypothetical protein                  | 3438127-3438246 | + | 120 |
| 140285 | STM14_3934     | 378452071 | + | 3436648-3436776 | hypothetical protein                  | 3438200-3438328 | + | 129 |
| 140285 | STM14_3938     | 378452075 | + | 3440518-3440661 | hypothetical protein                  | 3442070-3442213 | + | 144 |
| 140285 | STM14_3965     | 378452100 | - | 3464611-3464718 | hypothetical protein                  | 3471232-3471339 | - | 108 |
| 140285 | STM14_3985     | 378452118 | - | 3482355-3482456 | hypothetical protein                  | 3488978-3489079 | - | 102 |
| 140285 | STM14_3987     | 378452120 | + | 3483983-3484117 | hypothetical protein                  | 3490606-3490740 | + | 135 |
| 140285 | STM14_3996     | 378452128 | - | 3490436-3490546 | hypothetical protein                  | 3497059-3497169 | - | 111 |
| 140285 | STM14_4018     | 378452150 | - | 3508092-3508241 | hypothetical protein                  | 3514715-3514864 | - | 150 |
| 140285 | STM14_4019     | 378452151 | - | 3508281-3508475 | hypothetical protein                  | 3514904-3515098 | - | 195 |
| 140285 | STM14_4023     | 378452155 | + | 3515633-3515794 | hypothetical protein                  | 3522256-3522417 | + | 162 |
| 140285 | STM14_4034     | 378452166 | + | 3525086-3525205 | hypothetical protein                  | 3531709-3531828 | + | 120 |
| 140285 | STM14_4051     | 378452183 | - | 3540466-3540597 | malate dehydrogenase                  | 3547088-3547219 | - | 132 |

|         |                |           |   |                 |                                     |                 |   |     |
|---------|----------------|-----------|---|-----------------|-------------------------------------|-----------------|---|-----|
| 140285  | STM14_4053     | 378452185 | + | 3541795-3541923 | hypothetical protein                | 3548417-3548545 | + | 129 |
| T000240 | STMDT12_C34190 | 378985959 | + | 3551875-3551970 | hypothetical protein                | 3549132-3549227 | + | 96  |
| ST474   | STM474_3527    | 379702628 | - | 3554690-3554815 | hypothetical protein                | 3553791-3553916 | - | 126 |
| 140285  | STM14_4069     | 378452201 | + | 3558566-3558757 | hypothetical protein                | 3565188-3565379 | + | 192 |
| 140285  | STM14_4074     | 378452206 | - | 3563669-3563851 | hypothetical protein                | 3570291-3570473 | - | 183 |
| 140285  | STM14_4075     | 378452207 | + | 3563867-3563971 | hypothetical protein                | 3570489-3570593 | + | 105 |
| 140285  | STM14_4081     | 378452213 | - | 3568595-3568738 | hypothetical protein                | 3575217-3575360 | - | 144 |
| 140285  | STM14_4088     | 378452220 | - | 3574592-3574753 | hypothetical protein                | 3581214-3581375 | - | 162 |
| 140285  | STM14_4089     | 378452221 | + | 3574662-3574820 | hypothetical protein                | 3581284-3581442 | + | 159 |
| 140285  | yhvD           | 378452224 | + | 3579521-3579742 | putative outer membrane lipoprotein | 3586143-3586364 | + | 222 |
| 140285  | STM14_4093     | 378452225 | + | 3579746-3579922 | hypothetical protein                | 3586268-3586544 | + | 177 |
| 140285  | STM14_4094     | 378452226 | - | 3580182-3580316 | hypothetical protein                | 3586804-3586938 | - | 135 |
| 140285  | STM14_4095     | 378452227 | + | 3580370-3580480 | hypothetical protein                | 3586992-3587102 | + | 111 |
| T000240 | STMDT12_C34520 | 378985992 | - | 3595480-3595632 | hypothetical protein                | 3592696-3592848 | - | 153 |
| 140285  | STM14_4114     | 378452241 | - | 3595496-3595765 | putative cytoplasmic protein        | 3602118-3602387 | - | 270 |
| 140285  | rpmJ_2         | 378452249 | - | 3599737-3599853 | SOS ribosomal protein L36           | 3606359-3606475 | - | 117 |
| 140285  | STM14_4148     | 378452275 | - | 3611988-3612179 | elongation factor Tu                | 3618610-3618801 | - | 192 |
| ST474   | STM474_3611    | 379702705 | + | 3620933-3621070 | hypothetical protein                | 3619931-3620068 | + | 138 |
| 140285  | STM14_4163     | 378452290 | + | 3623551-3623655 | hypothetical protein                | 3630172-3630276 | + | 105 |
| 140285  | STM14_4167     | 378452293 | + | 3626355-3626480 | hypothetical protein                | 3632976-3633101 | + | 126 |
| 140285  | STM14_4172     | 378452298 | + | 3629162-3629344 | hypothetical protein                | 3635783-3635965 | + | 183 |
| 140285  | yhfg           | 378452304 | - | 3634805-3634972 | hypothetical protein                | 3641426-3641593 | - | 168 |
| 140285  | STM14_4180     | 378452306 | + | 3635785-3635937 | hypothetical protein                | 3642406-3642558 | + | 153 |
| 140285  | STM14_4182     | 378452308 | - | 3637245-3637421 | hypothetical protein                | 3643866-3644402 | - | 177 |
| 140285  | STM14_4185     | 378452311 | - | 3640241-3640396 | hypothetical protein                | 3646862-3647017 | - | 156 |
| 140285  | STM14_4192     | 378452318 | - | 3649991-3650131 | hypothetical protein                | 3656444-3656584 | - | 141 |
| 140285  | STM14_4207     | 378452333 | - | 3663870-3663983 | hypothetical protein                | 3670323-3670436 | - | 114 |
| 140285  | STM14_4213     | 378452339 | - | 3670273-3670407 | hypothetical protein                | 3676726-3676860 | - | 135 |
| 140285  | STM14_4214     | 378452340 | + | 3670342-3670449 | hypothetical protein                | 3676795-3676902 | + | 108 |
| 140285  | STM14_4220     | 378452346 | + | 3677538-3677768 | hypothetical protein                | 3683991-3684221 | + | 231 |
| 140285  | STM14_4224     | 378452350 | + | 3680653-3680766 | hypothetical protein                | 3687106-3687219 | + | 114 |
| 140285  | STM14_4229     | 378452355 | - | 3684140-3684289 | hypothetical protein                | 3690593-3690742 | - | 150 |
| 140285  | STM14_4233     | 378452359 | - | 3690393-3690500 | hypothetical protein                | 3696846-3696953 | - | 108 |
| 140285  | STM14_4235     | 378452361 | - | 3693591-3693866 | putative cytoplasmic protein        | 3700044-3700319 | - | 276 |
| 140285  | STM14_4240     | 378452366 | - | 3698369-3698491 | hypothetical protein                | 3704822-3704944 | - | 123 |
| 140285  | STM14_4243     | 378452369 | - | 3700901-3701017 | hypothetical protein                | 3707354-3707470 | - | 117 |
| 140285  | STM14_4259     | 378452384 | - | 3722125-3722298 | hypothetical protein                | 3728578-3728751 | - | 174 |
| 140285  | STM14_4261     | 378452386 | + | 3723463-3723627 | hypothetical protein                | 3729916-3730080 | + | 165 |
| 140285  | STM14_4263     | 378452387 | + | 3723698-3723940 | putative inner membrane protein     | 3730151-3730393 | + | 243 |
| 140285  | STM14_4269     | 378452393 | + | 3728906-3729031 | hypothetical protein                | 3735359-3735484 | + | 126 |
| 140285  | STM14_4270     | 378452394 | + | 3729191-3729319 | hypothetical protein                | 3735644-3735772 | + | 129 |
| ST474   | STM474_3713    | 379702806 | - | 3737509-3737628 | hypothetical protein                | 3736338-3736457 | - | 120 |
| 140285  | STM14_4277     | 378452401 | + | 3735927-3736031 | hypothetical protein                | 3742381-3742485 | + | 105 |
| 140285  | STM14_4293     | 378452417 | + | 3747983-3748117 | putative cytoplasmic protein        | 3754436-3754570 | + | 135 |
| 140285  | STM14_4296     | 378452420 | + | 3750462-3750605 | hypothetical protein                | 3756915-3757058 | + | 144 |
| 140285  | STM14_4316     | 378452440 | + | 3770553-3770684 | hypothetical protein                | 3777006-3777137 | + | 132 |
| 140285  | STM14_4325     | 378452449 | + | 3781138-3781305 | hypothetical protein                | 3787591-3787758 | + | 168 |
| 140285  | STM14_4333     | 378452457 | + | 3789092-3789217 | hypothetical protein                | 3795545-3795670 | + | 126 |
| 140285  | STM14_4336     | 378452460 | - | 3792675-3792815 | hypothetical protein                | 3799128-3799268 | - | 141 |
| 140285  | STM14_4339     | 378452463 | - | 3794036-3794179 | hypothetical protein                | 3800489-3800632 | - | 144 |
| 140285  | STM14_4340     | 378452464 | + | 3794140-3794265 | hypothetical protein                | 3800593-3800718 | + | 126 |
| 140285  | STM14_4343     | 378452467 | + | 3796527-3796667 | hypothetical protein                | 3802980-3803120 | + | 141 |
| 140285  | STM14_4347     | 378452471 | - | 3801111-3801227 | hypothetical protein                | 3807564-3807680 | - | 117 |
| 140285  | STM14_4350     | 378452474 | + | 3803739-3803876 | hypothetical protein                | 3810192-3810329 | + | 138 |
| 140285  | STM14_4352     | 378452476 | - | 3805315-3805461 | hypothetical protein                | 3811768-3811914 | - | 147 |
| 140285  | STM14_4354     | 378452478 | - | 3807400-3807591 | hypothetical protein                | 3813853-3814044 | - | 192 |
| 140285  | STM14_4361     | 378452485 | + | 3818231-3818344 | hypothetical protein                | 3824684-3824797 | + | 114 |
| ST474   | ldrD           | 379702886 | - | 3829507-3829632 | Small toxic polypeptide ldrD        | 3828335-3828460 | - | 126 |
| 140285  | STM14_4366     | 378452489 | - | 3822083-3822277 | hypothetical protein                | 3828536-3828730 | - | 195 |
| 140285  | STM14_4374     | 378452497 | - | 3827982-3828101 | hypothetical protein                | 3834435-3834554 | - | 120 |
| 140285  | STM14_4378     | 378452501 | - | 3832781-3832954 | hypothetical protein                | 3839234-3839407 | - | 174 |
| 140285  | STM14_4379     | 378452502 | + | 3832815-3832976 | hypothetical protein                | 3839268-3839429 | + | 162 |
| 140285  | STM14_4388     | 378452509 | + | 3842019-3842180 | hypothetical protein                | 3848471-3848632 | + | 162 |
| 140285  | STM14_4393     | 378452514 | + | 3846344-3846445 | hypothetical protein                | 3852796-3852897 | + | 102 |
| 140285  | STM14_4395     | 378452516 | - | 3847245-3847379 | hypothetical protein                | 3853697-3853831 | - | 135 |
| 140285  | STM14_4401     | 378452522 | - | 3851427-3851912 | putative acetyltransferase          | 3857879-3858364 | - | 486 |
| 140285  | STM14_4403     | 378452524 | - | 3852193-3852324 | hypothetical protein                | 3858645-3858776 | - | 132 |
| 140285  | STM14_4404     | 378452525 | - | 3852365-3852832 | putative acetyltransferase          | 3858817-3859284 | - | 468 |
| 140285  | STM14_4408     | 378452528 | + | 3856473-3856610 | hypothetical protein                | 3862925-3863062 | + | 138 |
| 140285  | STM14_4410     | 378452530 | - | 3856798-3857019 | hypothetical protein                | 3863250-3863471 | - | 222 |
| 140285  | STM14_4415     | 378452535 | + | 3861460-3861693 | hypothetical protein                | 3867912-3868145 | + | 234 |
| 140285  | STM14_4416     | 378452536 | - | 3861562-3861738 | hypothetical protein                | 3868014-3868190 | - | 177 |
| 140285  | STM14_4419     | 378452539 | + | 3863890-3864222 | hypothetical protein                | 3870342-3870674 | + | 333 |
| 140285  | STM14_4424     | 378452544 | - | 3869165-3869311 | hypothetical protein                | 3875617-3875763 | - | 147 |
| 140285  | STM14_4437     | 378452557 | + | 3881551-3881694 | hypothetical protein                | 3888002-3888145 | + | 144 |
| 140285  | STM14_4448     | 378452568 | + | 3893735-3893932 | hypothetical protein                | 3900186-3900383 | + | 198 |
| ST474   | STM474_3868    | 379702957 | - | 3911348-3911467 | hypothetical protein                | 3910174-3910293 | - | 120 |
| 140285  | STM14_4456     | 378452576 | + | 3904878-3905129 | hypothetical protein                | 3911328-3911579 | + | 252 |
| 140285  | yjvR           | 378452601 | - | 3929375-3929608 | putative inner membrane protein     | 3935824-3936057 | - | 234 |
| 140285  | STM14_4485     | 378452605 | - | 3932731-3932850 | hypothetical protein                | 3939180-3939299 | - | 120 |
| 140285  | STM14_4497     | 378452617 | + | 3941019-3941198 | hypothetical protein                | 3947468-3947647 | + | 180 |
| 140285  | STM14_4501     | 378452621 | + | 3943928-3944110 | hypothetical protein                | 3950377-3950559 | + | 183 |
| 140285  | STM14_4504     | 378452624 | + | 3946552-3946725 | hypothetical protein                | 3953001-3953174 | + | 174 |
| 140285  | STM14_4512     | 378452632 | - | 3954806-3954916 | hypothetical protein                | 3961256-3961366 | - | 111 |
| 140285  | STM14_4518     | 378452637 | + | 3962472-3962597 | hypothetical protein                | 3968922-3969047 | + | 126 |
| 140285  | STM14_4520     | 378452639 | + | 3963213-3963556 | hypothetical protein                | 3969663-3969806 | + | 144 |
| 140285  | STM14_4521     | 378452640 | - | 3963387-3963497 | hypothetical protein                | 3969837-3969947 | - | 111 |
| D23580  | STMMW_37441    | 378447121 | - | 3975758-3975931 | ISxAc3 transposase                  | 3973024-3973197 | - | 174 |
| D23580  | STMMW_37491    | 378447126 | - | 3981984-3982097 | putative product                    | 3979250-3979363 | - | 114 |
| 140285  | STM14_4531     | 378452648 | + | 3973351-3973476 | hypothetical protein                | 3979801-3979926 | + | 126 |
| 140285  | STM14_0363     | 378448623 | - | 352120-352227   | hypothetical protein                | 3980702-3980809 | - | 108 |
| 140285  | STM14_4535     | 378452652 | + | 3974935-3975075 | hypothetical protein                | 3981385-3981525 | + | 141 |
| T000240 | STMDT12_C38190 | 378986359 | - | 3984324-3984416 | hypothetical protein                | 3981570-3981662 | - | 93  |

|        |               |           |   |                 |                                      |                 |   |      |
|--------|---------------|-----------|---|-----------------|--------------------------------------|-----------------|---|------|
| 14028S | STM14_4537    | 378452654 | + | 3978059-3978172 | hypothetical protein                 | 3984509-3984622 | + | 114  |
| 14028S | STM14_4539    | 378452656 | + | 3979055-3979171 | hypothetical protein                 | 3985505-3985621 | + | 117  |
| 14028S | STM14_4540    | 378452657 | + | 3979172-3979297 | hypothetical protein                 | 3985622-3985747 | - | 126  |
| 14028S | STM14_4549    | 378452666 | + | 3986024-3986146 | hypothetical protein                 | 3992474-3992596 | + | 123  |
| 14028S | STM14_4551    | 378452668 | - | 3989051-3989164 | hypothetical protein                 | 3995501-3995614 | - | 114  |
| 14028S | STM14_4553    | 378452670 | + | 3989514-3989657 | hypothetical protein                 | 3995964-3996107 | + | 144  |
| 14028S | STM14_4557    | 378452674 | + | 3992829-3993152 | putative DNA-binding protein         | 3999278-3999601 | + | 324  |
| 14028S | STM14_4565    | 378452682 | - | 3999123-3999230 | hypothetical protein                 | 4005572-4005679 | - | 108  |
| 14028S | STM14_4578    | 378452695 | + | 4011296-4011472 | hypothetical protein                 | 4017744-4017920 | + | 177  |
| 14028S | ivbL          | 378452696 | - | 4011404-4011502 | ivb operon leader peptide            | 4017852-4017950 | - | 99   |
| 14028S | STM14_4580    | 378452697 | + | 4011519-4011680 | hypothetical protein                 | 4017967-4018128 | + | 162  |
| 14028S | STM14_4581    | 378452698 | - | 4011613-4011768 | hypothetical protein                 | 4018061-4018216 | - | 156  |
| 14028S | STM14_4582    | 378452699 | + | 4011777-4011950 | hypothetical protein                 | 4018225-4018398 | + | 174  |
| D23580 | STMMW_37861   | 378447163 | + | 4021208-4021303 | hypothetical protein                 | 4018473-4018568 | + | 96   |
| D23580 | STMMW_37871   | 378447164 | + | 4021319-4021408 | putative LexA-regulated protein TisB | 4018584-4018673 | + | 90   |
| 14028S | STM14_4587    | 378452702 | - | 4014492-4015577 | hypothetical protein                 | 4020941-4022026 | - | 1086 |
| 14028S | STM14_4589    | 378452704 | - | 4016572-4016697 | hypothetical protein                 | 4023021-4023146 | - | 126  |
| 14028S | STM14_4595    | 378452710 | + | 4020774-4020887 | hypothetical protein                 | 4027223-4027336 | + | 114  |
| ST474  | STM474_3981   | 379703066 | - | 4028417-4028551 | hypothetical protein                 | 4027244-4027378 | - | 135  |
| 14028S | STM14_4598    | 378452712 | + | 4022921-4023073 | hypothetical protein                 | 4029370-4029522 | + | 153  |
| 14028S | STM14_4601    | 378452715 | + | 4024130-4024306 | hypothetical protein                 | 4030579-4030755 | + | 177  |
| ST474  | STM474_3986   | 379703070 | - | 4031907-4032026 | hypothetical protein                 | 4030734-4030853 | - | 120  |
| 14028S | STM14_4630    | 378452743 | + | 4056093-4056239 | hypothetical protein                 | 4062550-4062696 | + | 147  |
| 14028S | STM14_4633    | 378452746 | + | 4059079-4059237 | hypothetical protein                 | 4065536-4065694 | + | 159  |
| 14028S | STM14_4636    | 378452749 | + | 4059858-4060115 | hypothetical protein                 | 4066315-4066572 | + | 258  |
| ST474  | STM474_4022   | 379703106 | - | 4071364-4071624 | hypothetical protein                 | 4070199-4070459 | - | 261  |
| T00240 | STMD12_C40060 | 378986546 | - | 4156200-4156427 | hypothetical protein                 | 4071235-4071462 | - | 228  |
| 14028S | STM14_4658    | 378452770 | + | 4086316-4086504 | hypothetical protein                 | 4092770-4092958 | + | 189  |
| 14028S | STM14_4669    | 378452781 | - | 4094364-4094507 | hypothetical protein                 | 4100818-4100961 | - | 144  |
| 14028S | STM14_4696    | 378452801 | + | 4122161-4122346 | hypothetical protein                 | 4128612-4128797 | + | 186  |
| 14028S | ivL           | 378452802 | + | 4122426-4122524 | ivG operon leader peptide            | 4128877-4128975 | + | 99   |
| 14028S | STM14_4733    | 378452833 | + | 4155257-4155382 | hypothetical protein                 | 4161708-4161833 | + | 126  |
| 14028S | STM14_4738    | 378452838 | - | 4159908-4160012 | hypothetical protein                 | 4166359-4166463 | - | 105  |
| 14028S | STM14_4740    | 378452840 | + | 4162570-4162710 | hypothetical protein                 | 4169021-4169161 | + | 141  |
| 14028S | STM14_4743    | 378452843 | + | 4163805-4164167 | putative cytoplasmic protein         | 4170256-4170618 | + | 363  |
| 14028S | STM14_4753    | 378452852 | - | 4171444-4171629 | hypothetical protein                 | 4177895-4178080 | - | 186  |
| 14028S | yigG          | 378452855 | - | 4173261-4173719 | hypothetical protein                 | 4179712-4180170 | - | 459  |
| 14028S | STM14_4759    | 378452858 | - | 4175211-4175348 | hypothetical protein                 | 4181662-4181799 | - | 138  |
| 14028S | yigM          | 378452865 | + | 4181464-4182363 | putative transport protein           | 4187915-4188814 | + | 900  |
| 14028S | STM14_4768    | 378452867 | + | 4183187-4183360 | hypothetical protein                 | 4189638-4189811 | + | 174  |
| ST474  | STM474_4144   | 379703214 | + | 4193636-4193764 | hypothetical protein                 | 4192232-4192360 | + | 129  |
| 14028S | STM14_4770    | 378452869 | - | 4185870-4186004 | hypothetical protein                 | 4192321-4192455 | - | 135  |
| 14028S | STM14_4771    | 378452870 | + | 4185906-4186052 | hypothetical protein                 | 4192357-4192503 | + | 147  |
| 14028S | STM14_4784    | 378452883 | + | 4197098-4197223 | hypothetical protein                 | 4203549-4203674 | + | 126  |
| 14028S | STM14_4800    | 378452894 | - | 4215049-4215231 | hypothetical protein                 | 4221500-4221682 | - | 183  |
| 14028S | STM14_4801    | 378452895 | + | 4215077-4215433 | hypothetical protein                 | 4221528-4221884 | + | 357  |
| 14028S | STM14_4808    | 378452902 | - | 4219525-4219656 | hypothetical protein                 | 4225976-4226107 | - | 132  |
| 14028S | STM14_4811    | 378452904 | + | 4222708-4222851 | hypothetical protein                 | 4229159-4229302 | + | 144  |
| 14028S | STM14_4813    | 378452906 | + | 4223708-4223932 | putative cytoplasmic protein         | 4230159-4230383 | + | 225  |
| 14028S | STM14_4816    | 378452909 | - | 4226121-4226246 | hypothetical protein                 | 4232572-4232697 | - | 126  |
| 14028S | STM14_4819    | 378452912 | - | 4228860-4229039 | hypothetical protein                 | 4235311-4235490 | - | 180  |
| 14028S | STM14_4821    | 378452914 | - | 4230571-4230990 | putative cytoplasmic protein         | 4237022-4237441 | - | 420  |
| 14028S | STM14_4837    | 378452930 | - | 4248232-4248351 | hypothetical protein                 | 4254683-4254802 | - | 120  |
| 14028S | STM14_4844    | 378452937 | - | 4253233-4253661 | putative cytoplasmic protein         | 4259684-4260112 | - | 429  |
| ST474  | STM474_4210   | 379703274 | - | 4263051-4263284 | hypothetical protein                 | 4261647-4261880 | - | 234  |
| 14028S | STM14_4847    | 378452940 | + | 4255220-4255531 | hypothetical protein                 | 4261671-4261982 | + | 312  |
| 14028S | STM14_4854    | 378452947 | - | 4262409-4262564 | hypothetical protein                 | 4268859-4269014 | - | 156  |
| 14028S | STM14_4856    | 378452949 | + | 4263770-4263904 | hypothetical protein                 | 4270220-4270354 | + | 135  |
| 14028S | STM14_4858    | 378452951 | + | 4265002-4265130 | hypothetical protein                 | 4271452-4271580 | + | 129  |
| 14028S | STM14_4867    | 378452960 | + | 4272347-4272496 | hypothetical protein                 | 4278797-4278946 | + | 150  |
| 14028S | STM14_4868    | 378452961 | - | 4272426-4272560 | hypothetical protein                 | 4278876-4279010 | - | 135  |
| 14028S | STM14_4872    | 378452965 | + | 4275521-4275652 | hypothetical protein                 | 4281971-4282102 | + | 132  |
| ST474  | STM474_4231   | 379703295 | + | 4283542-4283655 | hypothetical protein                 | 4282137-4282250 | + | 114  |
| 14028S | STM14_4873    | 378452966 | + | 4275986-4276111 | hypothetical protein                 | 4282436-4282561 | + | 126  |
| 14028S | STM14_4886    | 378452979 | - | 4286951-4287055 | hypothetical protein                 | 4293358-4293462 | - | 105  |
| 14028S | STM14_4893    | 378452986 | + | 4293425-4293589 | hypothetical protein                 | 4299832-4299996 | + | 165  |
| 14028S | STM14_4898    | 378452991 | - | 4296957-4297091 | hypothetical protein                 | 4303363-4303497 | - | 135  |
| 14028S | STM14_4909    | 378453002 | - | 4305795-4305962 | hypothetical protein                 | 4312200-4312367 | - | 168  |
| 14028S | STM14_4914    | 378453007 | + | 4310547-4310666 | hypothetical protein                 | 4316952-4317071 | + | 120  |
| 14028S | STM14_4916    | 378453009 | - | 4311024-4311164 | hypothetical protein                 | 4317429-4317569 | - | 141  |
| ST474  | STM474_4282   | 379703346 | + | 4329998-4330159 | hypothetical protein                 | 4328549-4328710 | + | 162  |
| 14028S | STM14_4934    | 378453027 | - | 4332008-4332127 | hypothetical protein                 | 4338413-4338532 | - | 120  |
| 14028S | STM14_4938    | 378453031 | + | 4336017-4336178 | hypothetical protein                 | 4342422-4342583 | + | 162  |
| 14028S | STM14_4943    | 378453035 | - | 4340772-4340927 | hypothetical protein                 | 4347177-4347332 | - | 156  |
| 14028S | STM14_4950    | 378453042 | + | 4346732-4346872 | hypothetical protein                 | 4353137-4353277 | + | 141  |
| 14028S | STM14_4951    | 378453043 | + | 4346784-4346900 | hypothetical protein                 | 4353189-4353305 | + | 117  |
| 14028S | STM14_4953    | 378453045 | + | 4348703-4348810 | hypothetical protein                 | 4355108-4355215 | + | 108  |
| 14028S | STM14_4961    | 378453053 | - | 4358974-4359162 | hypothetical protein                 | 4365379-4365567 | - | 189  |
| 14028S | STM14_4977    | 378453063 | - | 4373434-4373607 | putative cytoplasmic protein         | 4379839-4380012 | - | 174  |
| 14028S | STM14_4983    | 378453065 | + | 4375382-4375510 | hypothetical protein                 | 4381787-4381915 | + | 129  |
| 14028S | STM14_4994    | 378453076 | - | 4388486-4388623 | hypothetical protein                 | 4394891-4395028 | - | 138  |
| 14028S | STM14_4995    | 378453077 | + | 4388644-4388847 | hypothetical protein                 | 4395049-4395252 | + | 204  |
| 14028S | STM14_4997    | 378453079 | + | 4389931-4390140 | hypothetical protein                 | 4396336-4396545 | + | 210  |
| 14028S | STM14_5018    | 378453099 | + | 4407683-4407805 | hypothetical protein                 | 4414088-4414210 | + | 123  |
| 14028S | STM14_5019    | 378453100 | - | 4407796-4407918 | hypothetical protein                 | 4414201-4414323 | - | 123  |
| 14028S | STM14_5020    | 378453101 | + | 4407851-4407991 | hypothetical protein                 | 4414256-4414396 | + | 141  |
| 14028S | STM14_5025    | 378453102 | - | 4413499-4413630 | hypothetical protein                 | 4419910-4420041 | - | 132  |
| 14028S | STM14_5026    | 378453103 | + | 4413565-4413795 | hypothetical protein                 | 4419976-4420206 | + | 231  |
| 14028S | STM14_5031    | 378453108 | + | 4418519-4418641 | hypothetical protein                 | 4424930-4425052 | + | 123  |
| 14028S | STM14_5044    | 378453120 | - | 4431313-4431468 | hypothetical protein                 | 4437724-4437879 | - | 156  |
| 14028S | STM14_5046    | 378453122 | - | 4432382-4432672 | putative inner membrane protein      | 4438793-4439083 | - | 291  |
| 14028S | STM14_5053    | 378453129 | + | 4437882-4438004 | hypothetical protein                 | 4444293-4444415 | + | 123  |
| 14028S | STM14_5057    | 378453133 | - | 4441014-4441139 | hypothetical protein                 | 4447425-4447550 | - | 126  |

|         |                |           |   |                 |                                                              |                 |   |     |
|---------|----------------|-----------|---|-----------------|--------------------------------------------------------------|-----------------|---|-----|
| 14028S  | STM14_5072     | 378453147 | + | 4451435-4451575 | hypothetical protein                                         | 4457846-4457986 | + | 141 |
| 14028S  | yjbe           | 378453151 | + | 4455796-4456038 | putative outer membrane protein                              | 4462207-4462449 | + | 243 |
| 14028S  | STM14_5083     | 378453158 | + | 4462681-4462857 | hypothetical protein                                         | 4469092-4469268 | - | 177 |
| 14028S  | STM14_5084     | 378453159 | + | 4462737-4462877 | hypothetical protein                                         | 4469148-4469288 | - | 141 |
| 14028S  | STM14_5088     | 378453163 | + | 4466972-4467136 | hypothetical protein                                         | 4473383-4473547 | + | 165 |
| T000240 | STMDT12_C43680 | 378986908 | + | 4559620-4559715 | hypothetical protein                                         | 4474484-4474579 | + | 96  |
| 14028S  | STM14_5096     | 378453171 | + | 4474899-4475012 | putative cytoplasmic protein                                 | 4481310-4481423 | + | 114 |
| 14028S  | STM14_5101     | 378453176 | + | 4478537-4478704 | hypothetical protein                                         | 4484948-4485115 | + | 168 |
| 14028S  | STM14_5113     | 378453188 | + | 4489545-4489661 | putative cytoplasmic protein                                 | 4495956-4496072 | + | 117 |
| 14028S  | STM14_5115     | 378453190 | + | 4490374-4490565 | hypothetical protein                                         | 4496785-4496976 | - | 192 |
| 14028S  | STM14_5116     | 378453191 | + | 4490568-4490723 | hypothetical protein                                         | 4496979-4497134 | + | 156 |
| ST474   | STM474_4451    | 379703497 | + | 4498500-4498640 | hypothetical protein                                         | 4497160-4497300 | + | 141 |
| 14028S  | STM14_5117     | 378453192 | + | 4491399-4492031 | hypothetical protein                                         | 4497810-4498442 | + | 633 |
| 14028S  | STM14_5124     | 378453199 | + | 4515420-4515557 | hypothetical protein                                         | 4521831-4521968 | + | 138 |
| 14028S  | STM14_5125     | 378453200 | - | 4515741-4515845 | hypothetical protein                                         | 4522152-4522256 | - | 105 |
| 14028S  | STM14_5129     | 378453204 | - | 4518503-4518631 | hypothetical protein                                         | 4524914-4525042 | - | 129 |
| 14028S  | STM14_5131     | 378453206 | - | 4519322-4519456 | hypothetical protein                                         | 4525733-4525867 | - | 135 |
| 14028S  | STM14_5132     | 378453207 | - | 4519489-4519611 | hypothetical protein                                         | 4525900-4526022 | - | 123 |
| 14028S  | STM14_5134     | 378453209 | - | 4521030-4521188 | hypothetical protein                                         | 4527441-4527599 | - | 159 |
| 14028S  | STM14_5142     | 378453217 | + | 4529401-4529547 | putative cytoplasmic protein                                 | 4535812-4535958 | + | 147 |
| 14028S  | STM14_5149     | 378453224 | + | 4536353-4536481 | hypothetical protein                                         | 4542764-4542892 | - | 129 |
| 14028S  | STM14_5150     | 378453225 | + | 4536377-4536649 | hypothetical protein                                         | 4542788-4543060 | + | 273 |
| 14028S  | STM14_5152     | 378453227 | + | 4537849-4538022 | hypothetical protein                                         | 4544260-4544433 | + | 174 |
| 14028S  | STM14_5154     | 378453229 | + | 4538728-4538883 | hypothetical protein                                         | 4545139-4545294 | - | 156 |
| 14028S  | STM14_5160     | 378453235 | + | 4544189-4544284 | hypothetical protein                                         | 4550600-4550695 | + | 96  |
| 14028S  | STM14_5162     | 378453237 | + | 4546069-4546173 | hypothetical protein                                         | 4552480-4552584 | + | 105 |
| 14028S  | STM14_5168     | 378453243 | + | 4552110-4552238 | hypothetical protein                                         | 4558521-4558649 | + | 129 |
| 14028S  | STM14_5183     | 378453258 | + | 4571436-4571549 | hypothetical protein                                         | 4577847-4577966 | + | 114 |
| 14028S  | STM14_5187     | 378453262 | + | 4573428-4573715 | putative regulatory protein                                  | 4579839-4580126 | - | 288 |
| 14028S  | STM14_5189     | 378453264 | + | 4574725-4574850 | hypothetical protein                                         | 4581136-4581261 | + | 126 |
| 14028S  | STM14_5190     | 378453265 | + | 4574852-4575073 | putative cytoplasmic protein                                 | 4581263-4581484 | - | 222 |
| ST474   | STM474_4515    | 379703561 | - | 4585588-4585743 | hypothetical protein                                         | 4584248-4584403 | - | 156 |
| ST474   | STM474_4516    | 379703562 | - | 4586025-4586150 | hypothetical protein                                         | 4584685-4584810 | - | 126 |
| 14028S  | STM14_5194     | 378453269 | - | 4578381-4578758 | ethyl tert-butyl ether degradation EthD                      | 4584792-4585169 | - | 378 |
| 14028S  | STM14_5195     | 378453270 | + | 4578830-4579162 | putative regulatory protein                                  | 4585241-4585573 | + | 333 |
| 14028S  | STM14_5196     | 378453271 | - | 4579152-4579388 | hypothetical protein                                         | 4585563-4585799 | - | 237 |
| 14028S  | STM14_5203     | 378453277 | - | 4585245-4585367 | hypothetical protein                                         | 4591656-4591778 | - | 123 |
| 14028S  | STM14_5208     | 378453282 | - | 4589666-4589833 | hypothetical protein                                         | 4596077-4596244 | - | 168 |
| 14028S  | STM14_5211     | 378453285 | + | 4591089-4591223 | hypothetical protein                                         | 4597500-4597634 | + | 135 |
| 14028S  | STM14_5212     | 378453286 | - | 4591232-4591378 | hypothetical protein                                         | 4597643-4597789 | - | 147 |
| 14028S  | ecnB           | 378453290 | + | 4593310-4593456 | entericidin B membrane lipoprotein                           | 4599721-4599867 | + | 147 |
| 14028S  | STM14_5225     | 378453299 | + | 4599983-4600087 | hypothetical protein                                         | 4606394-4606498 | + | 105 |
| 14028S  | yjeT           | 378453317 | + | 4621626-4621823 | putative inner membrane protein                              | 4627805-4628002 | + | 198 |
| 14028S  | STM14_5247     | 378453318 | + | 4621703-4621933 | hypothetical protein                                         | 4627882-4628112 | + | 231 |
| 14028S  | STM14_5272     | 378453343 | - | 4642797-4642994 | hypothetical protein                                         | 4648895-4649172 | - | 198 |
| 14028S  | STM14_5273     | 378453344 | + | 4642921-4643028 | hypothetical protein                                         | 4649099-4649206 | + | 108 |
| 14028S  | STM14_5274     | 378453345 | + | 4643067-4643273 | putative cytoplasmic protein                                 | 4649245-4649451 | + | 207 |
| 14028S  | priB           | 378453347 | + | 4643746-4644060 | primosomal replication protein N                             | 4649924-4650238 | + | 315 |
| 14028S  | STM14_5288     | 378453359 | - | 4654346-4654567 | hypothetical protein                                         | 4660524-4660745 | - | 222 |
| 14028S  | STM14_5291     | 378453362 | - | 4655902-4656081 | hypothetical protein                                         | 4662080-4662259 | - | 180 |
| 14028S  | STM14_5295     | 378453366 | + | 4658725-4658841 | hypothetical protein                                         | 4664903-4665019 | + | 117 |
| 14028S  | STM14_5303     | 378453374 | - | 4669323-4669508 | hypothetical protein                                         | 4675502-4675687 | - | 186 |
| 14028S  | STM14_5305     | 378453376 | - | 4670877-4671137 | hypothetical protein                                         | 4677056-4677316 | - | 261 |
| 14028S  | STM14_5306     | 378453377 | + | 4671075-4671302 | hypothetical protein                                         | 4677254-4677481 | + | 228 |
| 14028S  | STM14_5309     | 378453380 | - | 4673931-4674110 | hypothetical protein                                         | 4680110-4680289 | - | 180 |
| ST474   | STM474_4616    | 379703657 | + | 4681690-4681806 | hypothetical protein                                         | 4680117-4680233 | + | 117 |
| 14028S  | STM14_5313     | 378453384 | - | 4678291-4678593 | putative cytoplasmic protein                                 | 4684470-4684772 | - | 303 |
| 14028S  | STM14_5315     | 378453386 | + | 4679544-4679654 | hypothetical protein                                         | 4685723-4685833 | + | 111 |
| ST474   | STM474_4627    | 379703668 | - | 4695124-4695237 | hypothetical protein                                         | 4693552-4693665 | - | 114 |
| 14028S  | STM14_5323     | 378453393 | + | 4689572-4689691 | hypothetical protein                                         | 4695751-4695870 | + | 120 |
| 14028S  | STM14_5347     | 378453416 | + | 4711078-4711185 | hypothetical protein                                         | 4717257-4717364 | + | 108 |
| ST474   | STM474_4653    | 379703693 | + | 4719860-4719991 | hypothetical protein                                         | 4718288-4718419 | + | 132 |
| 14028S  | pvrL           | 378453423 | + | 4717774-4717875 | pvrBI operon leader peptide                                  | 4723953-4724054 | - | 102 |
| UK1     | STMUK_4448     | 378991724 | + | 4665460-4665600 | putative cytoplasmic protein                                 | 4724034-4724174 | + | 141 |
| 14028S  | STM14_5356     | 378453425 | - | 4718450-4718566 | hypothetical protein                                         | 4724629-4724745 | - | 117 |
| T000240 | STMDT12_C45910 | 378987131 | + | 4803005-4803103 | hypothetical protein                                         | 4724635-4724733 | + | 99  |
| 14028S  | STM14_5359     | 378453428 | - | 4721103-4721225 | hypothetical protein                                         | 4727282-4727404 | - | 123 |
| 14028S  | STM14_5362     | 378453431 | + | 4723479-4723670 | hypothetical protein                                         | 4729658-4729849 | + | 192 |
| 14028S  | STM14_5367     | 378453436 | - | 4727023-4727145 | hypothetical protein                                         | 4733202-4733324 | - | 123 |
| 14028S  | STM14_5374     | 378453443 | - | 4734836-4734955 | putative cytoplasmic protein                                 | 4741015-4741134 | - | 120 |
| T000240 | STMDT12_C46080 | 378987148 | + | 4822036-4822131 | hypothetical protein                                         | 4743666-4743761 | + | 96  |
| 14028S  | STM14_5381     | 378453450 | + | 4741810-4741944 | hypothetical protein                                         | 4747989-4748123 | + | 135 |
| 14028S  | STM14_5396     | 378453464 | - | 4764865-4765110 | molybdopterin-guanine dinucleotide biosynthesis protein MobA | 4771044-4771289 | - | 246 |
| 14028S  | STM14_5399     | 378453466 | + | 4766523-4766714 | hypothetical protein                                         | 4772702-4772893 | + | 192 |
| 14028S  | STM14_5402     | 378453469 | - | 4768806-4769102 | hypothetical protein                                         | 4774985-4775281 | - | 297 |
| 14028S  | STM14_5406     | 378453473 | + | 4772201-4772314 | hypothetical protein                                         | 4778380-4778493 | + | 114 |
| 14028S  | STM14_5407     | 378453474 | - | 4772241-4772357 | hypothetical protein                                         | 4778420-4778536 | - | 117 |
| 14028S  | STM14_5410     | 378453477 | + | 4773638-4773850 | hypothetical protein                                         | 4779817-4780029 | + | 213 |
| 14028S  | STM14_5413     | 378453480 | + | 4775969-4776121 | hypothetical protein                                         | 4782148-4782300 | + | 153 |
| 14028S  | STM14_5415     | 378453482 | + | 4776954-4777076 | hypothetical protein                                         | 4783133-4783255 | + | 123 |
| 14028S  | STM14_5416     | 378453483 | - | 4776976-4777107 | hypothetical protein                                         | 4783155-4783286 | - | 132 |
| 14028S  | STM14_5426     | 378453493 | - | 4786173-4786316 | hypothetical protein                                         | 4792352-4792495 | - | 144 |
| 14028S  | STM14_5427     | 378453494 | + | 4786386-4786523 | hypothetical protein                                         | 4792565-4792702 | + | 138 |
| 14028S  | STM14_5429     | 378453496 | - | 4787107-4787220 | hypothetical protein                                         | 4793286-4793399 | - | 114 |
| ST474   | STM474_4722    | 379703761 | - | 4794952-4795101 | hypothetical protein                                         | 4793380-4793529 | - | 150 |
| 14028S  | STM14_5431     | 378453498 | - | 4788756-4788899 | putative cytoplasmic protein                                 | 4794935-4795078 | - | 144 |
| 14028S  | yjiS           | 378453499 | + | 4788866-4789030 | putative cytoplasmic protein                                 | 4795045-4795209 | + | 165 |
| 14028S  | STM14_5435     | 378453502 | - | 4790281-4790412 | hypothetical protein                                         | 4796460-4796591 | - | 132 |
| 14028S  | STM14_5440     | 378453507 | + | 4798305-4798442 | hypothetical protein                                         | 4804484-4804621 | + | 138 |
| 14028S  | STM14_5447     | 378453514 | - | 4804689-4804838 | hypothetical protein                                         | 4810868-4811017 | - | 150 |
| 14028S  | STM14_5455     | 378453522 | + | 4812431-4812535 | hypothetical protein                                         | 4818610-4818714 | + | 105 |
| 14028S  | STM14_5462     | 378453529 | - | 4818419-4818574 | hypothetical protein                                         | 4824598-4824753 | - | 156 |
| 14028S  | yjiQ           | 378453530 | + | 4818950-4819675 | putative transcriptional regulator                           | 4825129-4825854 | + | 726 |

|        |            |           |   |                 |                                 |                 |   |     |
|--------|------------|-----------|---|-----------------|---------------------------------|-----------------|---|-----|
| 14028S | STM14_5468 | 378453535 | + | 4823006-4823134 | hypothetical protein            | 4829185-4829313 | + | 129 |
| 14028S | STM14_5474 | 378453538 | + | 4824998-4825105 | hypothetical protein            | 4830945-4831052 | + | 108 |
| 14028S | STM14_5479 | 378453543 | + | 4828502-4828636 | hypothetical protein            | 4834449-4834583 | + | 135 |
| 14028S | STM14_5481 | 378453545 | + | 4829440-4829619 | hypothetical protein            | 4835387-4835566 | + | 180 |
| 14028S | STM14_5486 | 378453550 | + | 4833992-4834120 | hypothetical protein            | 4839939-4840067 | + | 129 |
| 14028S | STM14_5491 | 378453555 | - | 4838731-4839303 | putative outer membrane protein | 4844678-4845250 | - | 573 |
| 14028S | STM14_5496 | 378453560 | + | 4843995-4844144 | hypothetical protein            | 4849942-4850091 | + | 150 |
| ST474  | smp        | 379703819 | + | 4853656-4853805 | phosphoserine phosphatase       | 4851855-4852004 | + | 150 |
| 14028S | vjjY       | 378453584 | + | 4869015-4869155 | putative inner membrane protein | 4874962-4875102 | + | 141 |



| Genome name | Gene Name   | GI        | Reference details |               |                                          |               | Gene annotated in LT2 |             |  |
|-------------|-------------|-----------|-------------------|---------------|------------------------------------------|---------------|-----------------------|-------------|--|
|             |             |           | Strand            | CDS-region    | Product                                  | Coordinate    | Strand                | Length (bp) |  |
| 14028S      | STM14_0012  | 378448286 | +                 | 11257-11424   | hypothetical protein                     | 11257-11424   | +                     | 168         |  |
| 14028S      | STM14_0015  | 378448289 | +                 | 14845-14958   | hypothetical protein                     | 14845-14958   | +                     | 114         |  |
| 14028S      | STM14_0020  | 378448294 | -                 | 17613-17741   | hypothetical protein                     | 17613-17741   | -                     | 129         |  |
| 14028S      | STM14_0021  | 378448295 | +                 | 17665-17787   | hypothetical protein                     | 17665-17787   | +                     | 123         |  |
| 14028S      | STM14_0024  | 378448298 | +                 | 23091-23240   | hypothetical protein                     | 23091-23240   | +                     | 150         |  |
| 14028S      | STM14_0026  | 378448300 | -                 | 24094-24198   | hypothetical protein                     | 24094-24198   | -                     | 105         |  |
| 14028S      | STM14_0027  | 378448301 | +                 | 24316-24426   | hypothetical protein                     | 24316-24426   | +                     | 111         |  |
| 14028S      | STM14_0040  | 378448314 | +                 | 34828-34974   | hypothetical protein                     | 34828-34974   | +                     | 147         |  |
| 14028S      | STM14_0057  | 378448331 | +                 | 57203-57334   | hypothetical protein                     | 57203-57334   | +                     | 132         |  |
| 14028S      | STM14_0068  | 378448342 | -                 | 68513-68671   | hypothetical protein                     | 68513-68671   | -                     | 159         |  |
| ST474       | STM474_0083 | 379699298 | -                 | 92031-92228   | hypothetical protein                     | 92028-92225   | -                     | 198         |  |
| 14028S      | STM14_0097  | 378448371 | -                 | 95263-95379   | hypothetical protein                     | 94551-94667   | -                     | 117         |  |
| 14028S      | STM14_0102  | 378448376 | +                 | 98738-99019   | hypothetical protein                     | 98026-98307   | +                     | 282         |  |
| 14028S      | STM14_0105  | 378448379 | -                 | 101349-101474 | hypothetical protein                     | 100637-100762 | -                     | 126         |  |
| 14028S      | STM14_0113  | 378448387 | -                 | 108892-109053 | hypothetical protein                     | 108180-108341 | -                     | 162         |  |
| 14028S      | STM14_0128  | 378448402 | -                 | 127427-127546 | putative lipoprotein                     | 126715-126834 | -                     | 120         |  |
| 14028S      | STM14_0130  | 378448404 | -                 | 129166-129492 | hypothetical protein                     | 128454-128780 | -                     | 327         |  |
| ST474       | STM474_0114 | 379699329 | +                 | 128578-128724 | hypothetical protein                     | 128575-128721 | +                     | 147         |  |
| ST474       | STM474_0115 | 379699330 | +                 | 128926-129039 | hypothetical protein                     | 128923-129036 | +                     | 114         |  |
| 14028S      | STM14_0136  | 378448410 | -                 | 134689-134793 | hypothetical protein                     | 133977-134081 | -                     | 105         |  |
| 14028S      | STM14_0137  | 378448411 | +                 | 135067-135210 | hypothetical protein                     | 134355-134498 | +                     | 144         |  |
| 14028S      | STM14_0141  | 378448415 | -                 | 138755-138877 | hypothetical protein                     | 138043-138165 | -                     | 123         |  |
| 14028S      | STM14_0143  | 378448417 | -                 | 140204-140338 | hypothetical protein                     | 139492-139626 | -                     | 135         |  |
| 14028S      | STM14_0144  | 378448418 | +                 | 140496-140633 | hypothetical protein                     | 139784-139921 | +                     | 138         |  |
| 14028S      | STM14_0165  | 378448438 | +                 | 162875-162979 | LysR family transcriptional regulator    | 162162-162266 | +                     | 105         |  |
| 14028S      | STM14_0173  | 378448446 | -                 | 168890-169072 | hypothetical protein                     | 168177-168359 | -                     | 183         |  |
| 14028S      | STM14_0179  | 378448452 | -                 | 173962-174090 | hypothetical protein                     | 173249-173377 | -                     | 129         |  |
| 14028S      | STM14_0181  | 378448454 | +                 | 175672-175794 | hypothetical protein                     | 174959-175081 | +                     | 123         |  |
| 14028S      | STM14_0186  | 378448459 | +                 | 183222-183350 | hypothetical protein                     | 182509-182637 | +                     | 129         |  |
| 14028S      | STM14_0215  | 378448487 | -                 | 213058-213171 | hypothetical protein                     | 212354-212467 | -                     | 114         |  |
| 14028S      | STM14_0227  | 378448499 | -                 | 224289-224429 | hypothetical protein                     | 223584-223724 | -                     | 141         |  |
| 14028S      | STM14_0232  | 378448504 | +                 | 230459-230665 | hypothetical protein                     | 229754-229960 | +                     | 207         |  |
| 14028S      | STM14_0233  | 378448505 | +                 | 231001-231144 | hypothetical protein                     | 230297-230440 | +                     | 144         |  |
| 14028S      | STM14_0242  | 378448514 | +                 | 239222-239365 | hypothetical protein                     | 238518-238661 | +                     | 144         |  |
| 14028S      | STM14_0256  | 378448527 | +                 | 254799-255083 | 30S ribosomal protein S2                 | 254094-254378 | +                     | 285         |  |
| 14028S      | STM14_0262  | 378448533 | +                 | 259830-260033 | hypothetical protein                     | 259125-259328 | +                     | 204         |  |
| 14028S      | STM14_0292  | 378448562 | -                 | 289616-289819 | hypothetical protein                     | 288916-289119 | -                     | 204         |  |
| 14028S      | STM14_0310  | 378448574 | -                 | 304859-304966 | hypothetical protein                     | 304159-304266 | -                     | 108         |  |
| 14028S      | STM14_0312  | 378448575 | +                 | 305167-305274 | hypothetical protein                     | 304467-304574 | +                     | 108         |  |
| 14028S      | STM14_0337  | 378448600 | +                 | 330303-330512 | hypothetical protein                     | 329618-329827 | +                     | 210         |  |
| D23580      | STM14_0343  | 378443738 | +                 | 336610-336873 | hypothetical protein                     | 336639-336902 | +                     | 264         |  |
| 14028S      | STM14_0343  | 378448606 | +                 | 339144-339275 | hypothetical protein                     | 338459-338590 | +                     | 132         |  |
| 14028S      | STM14_0344  | 378448607 | +                 | 339345-339485 | hypothetical protein                     | 338660-338800 | +                     | 141         |  |
| ST474       | STM474_0312 | 379699516 | +                 | 341562-341681 | hypothetical protein                     | 342084-342203 | +                     | 120         |  |
| D23580      | STM14_0313  | 378443750 | +                 | 348247-348378 | putative transposase                     | 348276-348407 | +                     | 132         |  |
| 14028S      | STM14_0361  | 378448621 | -                 | 351322-351450 | hypothetical protein                     | 350637-350765 | -                     | 129         |  |
| 14028S      | STM14_0377  | 378448636 | -                 | 366783-366935 | hypothetical protein                     | 366098-366250 | -                     | 153         |  |
| UK1         | STMUK_0331  | 378987726 | +                 | 369132-369353 | putative inner membrane protein          | 369158-369379 | +                     | 222         |  |
| 14028S      | STM14_0397  | 378448654 | -                 | 385733-385843 | hypothetical protein                     | 385042-385152 | -                     | 111         |  |
| 14028S      | STM14_0403  | 378448660 | -                 | 390802-390939 | hypothetical protein                     | 390109-390246 | -                     | 138         |  |
| 14028S      | STM14_0411  | 378448668 | +                 | 399120-399233 | hypothetical protein                     | 398427-398540 | +                     | 114         |  |
| 14028S      | STM14_0415  | 378448672 | +                 | 402243-402422 | putative metal-binding transport protein | 401550-401729 | +                     | 180         |  |
| 14028S      | STM14_0419  | 378448676 | +                 | 409084-409218 | hypothetical protein                     | 408391-408525 | +                     | 135         |  |
| 14028S      | STM14_0420  | 378448677 | -                 | 409118-409237 | hypothetical protein                     | 408425-408544 | -                     | 120         |  |
| 14028S      | STM14_0430  | 378448687 | +                 | 418467-418640 | hypothetical protein                     | 417774-417947 | +                     | 174         |  |
| 14028S      | STM14_0436  | 378448693 | +                 | 425565-425684 | hypothetical protein                     | 424872-424991 | +                     | 120         |  |
| 14028S      | STM14_0437  | 378448694 | -                 | 425675-425827 | hypothetical protein                     | 424982-425134 | -                     | 153         |  |
| 14028S      | STM14_0441  | 378448698 | -                 | 430751-430909 | hypothetical protein                     | 430058-430216 | -                     | 159         |  |
| 14028S      | STM14_0442  | 378448699 | +                 | 430925-431059 | hypothetical protein                     | 430232-430366 | +                     | 135         |  |
| 14028S      | STM14_0446  | 378448703 | +                 | 433714-433827 | hypothetical protein                     | 433021-433134 | +                     | 114         |  |
| 14028S      | STM14_0451  | 378448708 | +                 | 437620-437742 | hypothetical protein                     | 436927-437049 | +                     | 123         |  |
| 14028S      | STM14_0453  | 378448710 | -                 | 438082-438243 | hypothetical protein                     | 437389-437550 | -                     | 162         |  |
| 14028S      | STM14_0457  | 378448714 | +                 | 440792-440941 | hypothetical protein                     | 440099-440248 | +                     | 150         |  |
| 14028S      | STM14_0464  | 378448721 | -                 | 444556-444687 | hypothetical protein                     | 443863-443994 | -                     | 132         |  |
| T000240     | STM14_0469  | 378982997 | +                 | 482933-483049 | hypothetical protein                     | 444888-445004 | +                     | 117         |  |
| 14028S      | STM14_0472  | 378448726 | +                 | 451315-451446 | hypothetical protein                     | 450622-450753 | -                     | 132         |  |
| 14028S      | STM14_0479  | 378448729 | +                 | 453755-453904 | hypothetical protein                     | 453062-453211 | -                     | 150         |  |
| 14028S      | STM14_0479  | 378448736 | +                 | 461340-461450 | DNA metabolism protein                   | 460647-460757 | +                     | 111         |  |
| 14028S      | STM14_0487  | 378448744 | +                 | 467631-467846 | hypothetical protein                     | 466938-467153 | +                     | 216         |  |
| ST474       | STM474_0431 | 379699631 | +                 | 466787-466939 | hypothetical protein                     | 467301-467453 | +                     | 153         |  |
| 14028S      | STM14_0491  | 378448747 | +                 | 469965-470111 | hypothetical protein                     | 469272-469418 | +                     | 147         |  |
| 14028S      | STM14_0498  | 378448754 | -                 | 473976-474284 | hypothetical protein                     | 473283-473591 | -                     | 309         |  |
| 14028S      | STM14_0509  | 378448765 | -                 | 484792-484902 | hypothetical protein                     | 484099-484209 | -                     | 111         |  |
| ST474       | STM474_0464 | 379699664 | -                 | 497880-498002 | hypothetical protein                     | 498394-498516 | -                     | 123         |  |
| 14028S      | STM14_0526  | 378448781 | +                 | 501468-501653 | hypothetical protein                     | 500775-500960 | +                     | 186         |  |
| 14028S      | STM14_0528  | 378448783 | -                 | 502053-502166 | hypothetical protein                     | 501360-501473 | -                     | 114         |  |
| 14028S      | STM14_0531  | 378448786 | +                 | 504670-504774 | hypothetical protein                     | 503977-504081 | +                     | 105         |  |
| 14028S      | STM14_0562  | 378448816 | -                 | 535085-535210 | hypothetical protein                     | 534391-534516 | -                     | 126         |  |
| 14028S      | STM14_0573  | 378448827 | -                 | 546597-546818 | hypothetical protein                     | 545903-546124 | -                     | 222         |  |
| 14028S      | STM14_0575  | 378448829 | +                 | 547392-547598 | hypothetical protein                     | 546698-546904 | +                     | 207         |  |
| 14028S      | STM14_0580  | 378448834 | +                 | 552798-552923 | hypothetical protein                     | 552104-552229 | +                     | 126         |  |
| 14028S      | STM14_0597  | 378448851 | +                 | 570227-570331 | hypothetical protein                     | 569533-569637 | +                     | 105         |  |
| 14028S      | STM14_0599  | 378448853 | -                 | 571546-571650 | hypothetical protein                     | 570852-570956 | -                     | 105         |  |
| 14028S      | STM14_0633  | 378448887 | -                 | 604316-604444 | hypothetical protein                     | 603622-603750 | -                     | 129         |  |
| 14028S      | STM14_0634  | 378448888 | +                 | 604400-604555 | hypothetical protein                     | 603706-603861 | +                     | 156         |  |
| 14028S      | STM14_0645  | 378448899 | +                 | 614019-614189 | hypothetical protein                     | 613325-613495 | +                     | 171         |  |
| 14028S      | STM14_0649  | 378448901 | +                 | 615283-615441 | hypothetical protein                     | 614589-614747 | +                     | 159         |  |
| 14028S      | STM14_0659  | 378448908 | -                 | 622266-622520 | hypothetical protein                     | 621572-621826 | -                     | 255         |  |
| 14028S      | STM14_0665  | 378448914 | +                 | 627603-627788 | hypothetical protein                     | 626909-627094 | +                     | 186         |  |
| 14028S      | STM14_0677  | 378448926 | +                 | 639577-639684 | hypothetical protein                     | 638883-638990 | +                     | 108         |  |
| 14028S      | STM14_0683  | 378448932 | -                 | 644504-644635 | hypothetical protein                     | 643810-643941 | -                     | 132         |  |

|         |                |           |   |                 |                                  |                 |   |     |
|---------|----------------|-----------|---|-----------------|----------------------------------|-----------------|---|-----|
| 140285  | STM14_0698     | 378448947 | + | 661861-661971   | hypothetical protein             | 661167-661277   | + | 111 |
| 140285  | STM14_0714     | 378448963 | + | 678228-678434   | hypothetical protein             | 677732-677938   | + | 207 |
| 140285  | STM14_0715     | 378448964 | + | 678399-678539   | hypothetical protein             | 677903-678043   | - | 141 |
| 140285  | STM14_0726     | 378448975 | + | 688331-688513   | hypothetical protein             | 687835-688017   | + | 183 |
| 140285  | STM14_0730     | 378448979 | + | 692333-692443   | hypothetical protein             | 691837-691947   | + | 111 |
| 140285  | STM14_0735     | 378448984 | + | 694969-695076   | hypothetical protein             | 694473-694580   | + | 108 |
| 140285  | STM14_0738     | 378448987 | - | 696364-696498   | hypothetical protein             | 695868-696002   | - | 135 |
| 140285  | STM14_0740     | 378448989 | - | 697584-697727   | hypothetical protein             | 697088-697231   | - | 144 |
| 140285  | STM14_0742     | 378448991 | + | 698354-698719   | hypothetical protein             | 697858-698223   | + | 366 |
| 140285  | STM14_0745     | 378448994 | + | 700128-700277   | hypothetical protein             | 699632-699781   | + | 150 |
| T000240 | STMDT12_C07050 | 378983246 | - | 742985-743125   | hypothetical protein             | 704932-705072   | - | 141 |
| 140285  | STM14_0774     | 378449022 | + | 730309-730596   | hypothetical protein             | 729812-730099   | + | 288 |
| 140285  | STM14_0777     | 378449025 | - | 733102-733251   | hypothetical protein             | 732605-732754   | - | 150 |
| 140285  | STM14_0780     | 378449028 | - | 734838-734957   | hypothetical protein             | 734341-734460   | - | 120 |
| 140285  | STM14_0791     | 378449032 | + | 739310-739477   | hypothetical protein             | 738813-738980   | + | 168 |
| 140285  | STM14_0797     | 378449038 | - | 745470-745595   | hypothetical protein             | 744973-745098   | - | 126 |
| 140285  | STM14_0800     | 378449041 | + | 749621-749734   | hypothetical protein             | 749124-749237   | + | 114 |
| 140285  | STM14_0801     | 378449042 | + | 749864-750154   | hypothetical protein             | 749367-749657   | + | 291 |
| 140285  | STM14_0809     | 378449050 | + | 757442-757591   | hypothetical protein             | 756945-757094   | + | 150 |
| 140285  | STM14_0812     | 378449053 | + | 758607-758720   | hypothetical protein             | 758110-758223   | + | 114 |
| 140285  | STM14_0819     | 378449060 | - | 766193-766318   | hypothetical protein             | 765696-765821   | - | 126 |
| 140285  | STM14_0820     | 378449061 | + | 766472-766585   | hypothetical protein             | 765975-766088   | + | 114 |
| 140285  | STM14_0826     | 378449067 | - | 774532-774729   | K+-transporting ATPase subunit F | 774035-774232   | - | 198 |
| T000240 | STMDT12_C07730 | 378983314 | - | 820062-820163   | hypothetical protein             | 781232-781333   | - | 102 |
| 140285  | STM14_0859     | 378449100 | + | 808472-808597   | hypothetical protein             | 807975-808100   | + | 126 |
| ST474   | STM474_0763    | 379699951 | + | 807598-807723   | hypothetical protein             | 808187-808312   | + | 126 |
| ST474   | STM474_0764    | 379699952 | - | 808597-808710   | hypothetical protein             | 809186-809299   | - | 114 |
| 140285  | STM14_0860     | 378449101 | - | 809819-809962   | hypothetical protein             | 809322-809465   | - | 144 |
| 140285  | STM14_0864     | 378449105 | + | 812877-813017   | hypothetical protein             | 812380-812520   | + | 141 |
| 140285  | STM14_0873     | 378449114 | - | 818715-819254   | hypothetical protein             | 818218-818757   | - | 540 |
| 140285  | STM14_0879     | 378449115 | - | 820227-820322   | hypothetical protein             | 819885-819980   | - | 96  |
| 140285  | STM14_0897     | 378449132 | - | 837473-837664   | hypothetical protein             | 837133-837324   | - | 192 |
| 140285  | STM14_0903     | 378449138 | + | 843123-843230   | hypothetical protein             | 842783-842890   | + | 108 |
| ST474   | STM474_0818    | 379700001 | + | 857893-858006   | hypothetical protein             | 858638-858751   | + | 114 |
| 140285  | STM14_0924     | 378449158 | + | 864209-864493   | hypothetical protein             | 863868-864152   | + | 285 |
| 140285  | STM14_0925     | 378449159 | + | 864550-864777   | hypothetical protein             | 864209-864436   | + | 228 |
| 140285  | STM14_927      | 378449161 | + | 867104-867277   | putative cytoplasmic protein     | 866763-866936   | + | 174 |
| 140285  | STM14_946      | 378449180 | - | 881747-881884   | hypothetical protein             | 880695-880832   | - | 138 |
| 140285  | STM14_952      | 378449186 | - | 888006-888110   | hypothetical protein             | 886954-887058   | - | 105 |
| 140285  | STM14_956      | 378449190 | + | 891948-892067   | hypothetical protein             | 890896-891015   | + | 120 |
| 140285  | STM14_958      | 378449192 | - | 892325-892444   | hypothetical protein             | 891273-891392   | - | 120 |
| 140285  | STM14_961      | 378449195 | + | 895674-895811   | hypothetical protein             | 894622-894759   | + | 138 |
| 140285  | STM14_965      | 378449199 | - | 898059-898181   | hypothetical protein             | 897007-897129   | - | 123 |
| 140285  | STM14_967      | 378449201 | - | 899158-899316   | hypothetical protein             | 898106-898264   | - | 159 |
| 140285  | STM14_969      | 378449203 | - | 900254-900415   | hypothetical protein             | 899202-899363   | - | 162 |
| 140285  | STM14_970      | 378449204 | - | 900375-900506   | hypothetical protein             | 899323-899544   | - | 132 |
| 140285  | STM14_973      | 378449207 | + | 902910-903080   | hypothetical protein             | 901858-902028   | + | 171 |
| 140285  | STM14_974      | 378449208 | - | 903009-903137   | hypothetical protein             | 901957-902085   | - | 129 |
| 140285  | STM14_982      | 378449216 | + | 911396-911509   | hypothetical protein             | 910344-910457   | + | 114 |
| 140285  | STM14_986      | 378449220 | - | 915878-916033   | hypothetical protein             | 914826-914981   | - | 156 |
| 140285  | STM14_989      | 378449223 | + | 917997-918137   | hypothetical protein             | 916945-917085   | + | 141 |
| 140285  | STM14_995      | 378449229 | - | 924480-924599   | hypothetical protein             | 923428-923547   | - | 120 |
| 140285  | STM14_997      | 378449231 | + | 925933-926067   | hypothetical protein             | 924881-925015   | + | 135 |
| 140285  | STM14_999      | 378449233 | + | 926622-926762   | hypothetical protein             | 925570-925710   | + | 141 |
| 140285  | STM14_1000     | 378449234 | + | 926970-927134   | hypothetical protein             | 925918-926082   | + | 165 |
| 140285  | STM14_1006     | 378449239 | - | 931103-931243   | hypothetical protein             | 930051-930191   | - | 141 |
| 140285  | STM14_1010     | 378449243 | + | 934780-934917   | hypothetical protein             | 933728-933865   | + | 138 |
| 140285  | STM14_1019     | 378449251 | + | 942902-943027   | hypothetical protein             | 941850-941975   | + | 126 |
| 140285  | STM14_1034     | 378449266 | + | 955378-955569   | hypothetical protein             | 954326-954517   | + | 192 |
| 140285  | STM14_1038     | 378449270 | - | 958765-958965   | hypothetical protein             | 957173-957913   | - | 201 |
| 140285  | STM14_1053     | 378449285 | + | 972908-973111   | hypothetical protein             | 1014579-1014782 | + | 204 |
| 140285  | STM14_1055     | 378449287 | + | 973986-974153   | hypothetical protein             | 1015657-1015824 | + | 168 |
| 140285  | STM14_1060     | 378449292 | - | 980013-980138   | hypothetical protein             | 1021684-1021809 | - | 126 |
| 140285  | STM14_1061     | 378449293 | + | 980033-980176   | hypothetical protein             | 1021704-1021847 | + | 144 |
| 140285  | STM14_1067     | 378449299 | - | 984062-984343   | hypothetical protein             | 1025733-1026014 | - | 282 |
| 140285  | STM14_1069     | 378449301 | - | 985102-985260   | hypothetical protein             | 1026773-1026931 | - | 159 |
| 140285  | STM14_1081     | 378449312 | - | 994689-994946   | hypothetical protein             | 1036360-1036617 | - | 258 |
| 140285  | STM14_1082     | 378449313 | - | 994867-995142   | hypothetical protein             | 1036538-1036813 | - | 276 |
| 140285  | STM14_1087     | 378449318 | + | 1001941-1002111 | hypothetical protein             | 1043582-1043752 | + | 171 |
| 140285  | STM14_1092     | 378449323 | + | 1007647-1007754 | hypothetical protein             | 1049288-1049395 | + | 108 |
| 140285  | STM14_1093     | 378449324 | - | 1007837-1007968 | hypothetical protein             | 1049478-1049609 | - | 132 |
| 140285  | STM14_1102     | 378449333 | + | 1018831-1018959 | hypothetical protein             | 1060472-1060600 | + | 129 |
| 140285  | STM14_1104     | 378449335 | + | 1019641-1019754 | hypothetical protein             | 1061282-1061395 | + | 114 |
| 140285  | STM14_1108     | 378449339 | - | 1023127-1023381 | hypothetical protein             | 1064768-1065022 | - | 255 |
| 140285  | STM14_1118     | 378449349 | - | 1033792-1033944 | hypothetical protein             | 1075433-1075585 | - | 153 |
| 140285  | STM14_1129     | 378449360 | - | 1047995-1048126 | hypothetical protein             | 1089636-1089767 | - | 132 |
| 140285  | STM14_1131     | 378449362 | + | 1049521-1049673 | hypothetical protein             | 1091162-1091314 | + | 153 |
| 140285  | STM14_1133     | 378449364 | - | 1051307-1051426 | hypothetical protein             | 1092948-1093067 | - | 120 |
| 140285  | STM14_1135     | 378449366 | - | 1051897-1052118 | hypothetical protein             | 1093538-1093759 | - | 222 |
| 140285  | STM14_1137     | 378449368 | + | 1053504-1053662 | hypothetical protein             | 1095145-1095303 | + | 159 |
| ST474   | STM474_0999    | 379700176 | + | 1061436-1061582 | hypothetical protein             | 1104869-1105015 | + | 147 |
| ST474   | STM474_1001    | 379700178 | + | 1061983-1062096 | hypothetical protein             | 1105416-1105529 | + | 114 |
| 140285  | STM14_1149     | 378449380 | + | 1063939-1064178 | hypothetical protein             | 1105580-1105819 | + | 240 |
| 140285  | STM14_1157     | 378449388 | + | 1068009-1068230 | hypothetical protein             | 1109650-1109871 | + | 222 |
| 140285  | STM14_1159     | 378449390 | + | 1068921-1069121 | hypothetical protein             | 1110562-1110762 | + | 201 |
| 140285  | STM14_3197     | 378451364 | + | 2811771-2811908 | hypothetical protein             | 1114717-1114854 | - | 138 |
| D23580  | STMMW_10422    | 378444470 | + | 1114868-1115074 | prophage protein                 | 1118992-1119198 | + | 207 |
| ST474   | STM474_1045    | 379700222 | + | 1098511-1098666 | hypothetical protein             | 1142189-1142344 | + | 156 |
| 140285  | STM14_1201     | 378449431 | - | 1106320-1106445 | hypothetical protein             | 1147975-1148100 | - | 126 |
| 140285  | STM14_1209     | 378449439 | - | 1115818-1116021 | hypothetical protein             | 1157474-1157677 | - | 204 |
| 140285  | STM14_1216     | 378449446 | - | 1121248-1121352 | hypothetical protein             | 1162904-1163008 | - | 105 |
| T000240 | STMDT12_C11030 | 378983644 | + | 1169756-1169860 | hypothetical protein             | 1172071-1172175 | + | 105 |
| 140285  | STM14_1234     | 378449463 | + | 1135671-1135796 | hypothetical protein             | 1177327-1177452 | + | 126 |

|        |             |           |   |                 |                                                       |                 |   |     |
|--------|-------------|-----------|---|-----------------|-------------------------------------------------------|-----------------|---|-----|
| 140285 | STM14_1244  | 378449473 | - | 1143230-1143337 | hypothetical protein                                  | 1184886-1184993 | - | 108 |
| 140285 | STM14_1245  | 378449474 | + | 1143361-1143543 | hypothetical protein                                  | 1185017-1185199 | + | 183 |
| 140285 | STM14_1249  | 378449478 | - | 1146275-1146388 | hypothetical protein                                  | 1187931-1188044 | - | 114 |
| 140285 | STM14_1254  | 378449483 | - | 1150549-1150701 | hypothetical protein                                  | 1192205-1192357 | - | 153 |
| 140285 | STM14_1260  | 378449489 | - | 1155618-1155782 | hypothetical protein                                  | 1197274-1197438 | - | 165 |
| 140285 | STM14_1262  | 378449491 | + | 1156832-1156987 | hypothetical protein                                  | 1198488-1198643 | + | 156 |
| 140285 | STM14_1265  | 378449494 | - | 1158383-1158577 | hypothetical protein                                  | 1200039-1200233 | - | 195 |
| 140285 | STM14_1273  | 378449502 | + | 1164294-1164521 | hypothetical protein                                  | 1205950-1206177 | + | 228 |
| 140285 | STM14_1279  | 378449506 | - | 1170030-1170278 | hypothetical protein                                  | 1211685-1211933 | - | 249 |
| 140285 | STM14_1280  | 378449507 | - | 1170167-1170286 | hypothetical protein                                  | 1211822-1211941 | - | 120 |
| 140285 | STM14_1282  | 378449509 | + | 1172347-1172457 | hypothetical protein                                  | 1214002-1214112 | + | 111 |
| 140285 | STM14_1286  | 378449512 | + | 1174679-1174783 | hypothetical protein                                  | 1216334-1216438 | + | 105 |
| 140285 | STM14_1288  | 378449514 | + | 1176314-1176421 | hypothetical protein                                  | 1217969-1218076 | + | 108 |
| 140285 | STM14_1289  | 378449515 | - | 1176396-1176605 | hypothetical protein                                  | 1218051-1218260 | - | 210 |
| 140285 | STM14_1291  | 378449517 | - | 1177413-1177520 | hypothetical protein                                  | 1219068-1219175 | - | 108 |
| 140285 | STM14_1292  | 378449518 | + | 1177573-1177704 | hypothetical protein                                  | 1219228-1219359 | + | 132 |
| 140285 | STM14_1307  | 378449532 | - | 1188559-1188696 | hypothetical protein                                  | 1230397-1230534 | - | 138 |
| 140285 | STM14_1308  | 378449533 | - | 1188894-1189040 | hypothetical protein                                  | 1230732-1230878 | - | 147 |
| 140285 | STM14_1316  | 378449541 | - | 1194339-1194509 | hypothetical protein                                  | 1236177-1236347 | - | 171 |
| 140285 | STM14_1322  | 378449547 | + | 1200601-1201062 | hypothetical protein                                  | 1242439-1242900 | + | 462 |
| 140285 | STM14_1327  | 378449552 | + | 1204177-1204380 | hypothetical protein                                  | 1246015-1246218 | + | 204 |
| 140285 | STM14_1339  | 378449564 | - | 1212983-1213159 | hypothetical protein                                  | 1254821-1254997 | - | 177 |
| 140285 | STM14_1344  | 378449569 | - | 1216241-1216396 | flagellar basal body P-ring biosynthesis protein FlgA | 1258078-1258233 | - | 156 |
| 140285 | STM14_1356  | 378449581 | - | 1226280-1226474 | hypothetical protein                                  | 1268117-1268311 | - | 195 |
| 140285 | STM14_1376  | 378449600 | - | 1244261-1244398 | hypothetical protein                                  | 1286098-1286235 | - | 138 |
| 140285 | STM14_1390  | 378449614 | - | 1256910-1257065 | hypothetical protein                                  | 1298747-1298902 | - | 156 |
| 140285 | STM14_1399  | 378449623 | - | 1267794-1267916 | hypothetical protein                                  | 1309631-1309753 | - | 123 |
| 140285 | STM14_1401  | 378449625 | - | 1269076-1269240 | hypothetical protein                                  | 1310913-1311077 | - | 165 |
| 140285 | STM14_1487  | 378449708 | - | 1337214-1337372 | hypothetical protein                                  | 1327239-1327397 | - | 159 |
| 140285 | STM14_1488  | 378449709 | + | 1337312-1337452 | hypothetical protein                                  | 1327337-1327477 | + | 141 |
| 140285 | STM14_1489  | 378449710 | + | 1337337-1337585 | hypothetical protein                                  | 1327362-1327610 | + | 249 |
| 140285 | STM14_1494  | 378449714 | - | 1340405-1340575 | hypothetical protein                                  | 1330430-1330600 | - | 171 |
| 140285 | STM14_1496  | 378449716 | - | 1341060-1341188 | hypothetical protein                                  | 1331085-1331213 | - | 129 |
| 140285 | STM14_1499  | 378449718 | + | 1341718-1341825 | hypothetical protein                                  | 1331743-1331850 | + | 108 |
| 140285 | STM14_1500  | 378449719 | - | 1342043-1342192 | hypothetical protein                                  | 1332068-1332217 | - | 150 |
| 140285 | STM14_1502  | 378449721 | - | 1342962-1343096 | hypothetical protein                                  | 1332987-1333121 | - | 135 |
| 140285 | STM14_1506  | 378449723 | - | 1344493-1344636 | hypothetical protein                                  | 1334518-1334661 | - | 144 |
| 140285 | STM14_1507  | 378449724 | + | 1344742-1344867 | putative lipoprotein                                  | 1334767-1334892 | + | 126 |
| ST474  | STM474_1249 | 379700419 | - | 1291877-1292050 | hypothetical protein                                  | 1335024-1335197 | - | 174 |
| 140285 | STM14_1510  | 378449727 | - | 1346067-1346216 | putative inner membrane protein                       | 1336092-1336241 | - | 150 |
| 140285 | STM14_1514  | 378449731 | - | 1348508-1348666 | hypothetical protein                                  | 1338533-1338691 | - | 159 |
| 140285 | STM14_1524  | 378449740 | - | 1356451-1356600 | hypothetical protein                                  | 1346476-1346625 | - | 150 |
| 140285 | STM14_1528  | 378449744 | + | 1358977-1359201 | hypothetical protein                                  | 1349002-1349226 | + | 225 |
| 140285 | STM14_1533  | 378449749 | - | 1361225-1361380 | hypothetical protein                                  | 1351250-1351405 | - | 156 |
| 140285 | STM14_1536  | 378449752 | - | 1362034-1362159 | hypothetical protein                                  | 1352059-1352184 | - | 126 |
| 140285 | STM14_1540  | 378449756 | - | 1363413-1363529 | hypothetical protein                                  | 1353438-1353554 | - | 117 |
| 140285 | STM14_1541  | 378449757 | - | 1363501-1363599 | hypothetical protein                                  | 1353526-1353624 | - | 99  |
| 140285 | STM14_1545  | 378449761 | - | 1364743-1364856 | hypothetical protein                                  | 1354768-1354881 | - | 114 |
| 140285 | STM14_1546  | 378449762 | + | 1364774-1364911 | hypothetical protein                                  | 1354799-1354936 | + | 138 |
| 140285 | STM14_1550  | 378449766 | + | 1367385-1367522 | hypothetical protein                                  | 1357409-1357546 | + | 138 |
| 140285 | STM14_1554  | 378449770 | + | 1370048-1370245 | hypothetical protein                                  | 1360072-1360269 | + | 198 |
| 140285 | STM14_1555  | 378449771 | + | 1370136-1370267 | salivary secreted protein                             | 1360160-1360291 | + | 132 |
| 140285 | STM14_1557  | 378449773 | + | 1371682-1371801 | hypothetical protein                                  | 1361706-1361825 | + | 120 |
| ST474  | STM474_1289 | 379700457 | + | 1320526-1320669 | hypothetical protein                                  | 1363673-1363816 | + | 144 |
| 140285 | STM14_1559  | 378449775 | - | 1373854-1374027 | hypothetical protein                                  | 1363877-1364050 | - | 174 |
| 140285 | STM14_1564  | 378449780 | - | 1378335-1378511 | hypothetical protein                                  | 1368358-1368534 | - | 177 |
| 140285 | STM14_1566  | 378449782 | + | 1379655-1379795 | hypothetical protein                                  | 1369678-1369818 | + | 141 |
| 140285 | STM14_1569  | 378449785 | + | 1380898-1381002 | hypothetical protein                                  | 1370922-1371026 | + | 105 |
| 140285 | STM14_1572  | 378449788 | + | 1382785-1382889 | hypothetical protein                                  | 1372809-1372913 | + | 105 |
| 140285 | STM14_1581  | 378449797 | + | 1391859-1392038 | hypothetical protein                                  | 1381883-1382062 | + | 180 |
| 140285 | STM14_1587  | 378449803 | + | 1398234-1398449 | hypothetical protein                                  | 1388258-1388473 | + | 216 |
| ST474  | STM474_1315 | 379700483 | + | 1347752-1347886 | hypothetical protein                                  | 1390899-1391033 | + | 135 |
| 140285 | STM14_1591  | 378449807 | + | 1400923-1401129 | hypothetical protein                                  | 1390947-1391153 | + | 207 |
| 140285 | STM14_1593  | 378449809 | + | 1401610-1401732 | hypothetical protein                                  | 1391634-1391756 | + | 123 |
| 140285 | STM14_1601  | 378449817 | + | 1409372-1409509 | hypothetical protein                                  | 1399396-1399533 | + | 138 |
| 140285 | STM14_1602  | 378449818 | - | 1409399-1409647 | hypothetical protein                                  | 1399423-1399671 | - | 249 |
| 140285 | STM14_1615  | 378449831 | + | 1419534-1419740 | hypothetical protein                                  | 1409558-1409764 | + | 207 |
| 140285 | STM14_1617  | 378449833 | + | 1421769-1421954 | hypothetical protein                                  | 1411793-1411978 | + | 186 |
| 140285 | STM14_1618  | 378449834 | + | 1421956-1422090 | hypothetical protein                                  | 1411980-1412114 | + | 135 |
| 140285 | STM14_1623  | 378449839 | - | 1425398-1425562 | hypothetical protein                                  | 1415422-1415586 | - | 165 |
| 140285 | STM14_1631  | 378449847 | - | 1432577-1432696 | hypothetical protein                                  | 1422601-1422720 | - | 120 |
| 140285 | STM14_1636  | 378449852 | + | 1436467-1436571 | hypothetical protein                                  | 1426491-1426595 | + | 105 |
| ST474  | STM474_1353 | 379700521 | + | 1384122-1384307 | hypothetical protein                                  | 1427269-1427454 | + | 186 |
| 140285 | STM14_1638  | 378449854 | - | 1437586-1437699 | hypothetical protein                                  | 1427610-1427723 | - | 114 |
| 140285 | STM14_1652  | 378449868 | + | 1452598-1452744 | hypothetical protein                                  | 1442622-1442768 | + | 147 |
| 140285 | STM14_1653  | 378449869 | - | 1452728-1452838 | hypothetical protein                                  | 1442752-1442862 | - | 111 |
| 140285 | STM14_1658  | 378449873 | - | 1456308-1456475 | hypothetical protein                                  | 1446332-1446499 | - | 168 |
| ST474  | STM474_1383 | 379700550 | - | 1418471-1418587 | hypothetical protein                                  | 1461619-1461735 | - | 117 |
| ST474  | STM474_1395 | 379700562 | + | 1431868-1432002 | hypothetical protein                                  | 1475016-1475150 | + | 135 |
| 140285 | STM14_1685  | 378449900 | - | 1486016-1486129 | hypothetical protein                                  | 1476040-1476153 | - | 114 |
| 140285 | STM14_1692  | 378449907 | + | 1493410-1493517 | hypothetical protein                                  | 1483434-1483541 | + | 108 |
| 140285 | STM14_1719  | 378449934 | + | 1511477-1511602 | hypothetical protein                                  | 1501501-1501626 | + | 126 |
| 140285 | STM14_1728  | 378449941 | + | 1519171-1519452 | hypothetical protein                                  | 1509195-1509476 | + | 282 |
| 140285 | STM14_1751  | 378449964 | + | 1538110-1538277 | hypothetical protein                                  | 1528134-1528301 | + | 168 |
| 140285 | STM14_1761  | 410023179 | + | 1546024-1546179 | hypothetical protein                                  | 1536048-1536203 | - | 156 |
| 140285 | STM14_1764  | 378449977 | + | 1548438-1548683 | hypothetical protein                                  | 1538462-1538707 | + | 246 |
| 140285 | STM14_1776  | 378449987 | - | 1559385-1559906 | outer membrane protein                                | 1549408-1549713 | - | 306 |
| 140285 | STM14_1782  | 378449992 | - | 1563882-1564016 | putative amino acid permease                          | 1553905-1554039 | - | 135 |
| 140285 | STM14_1783  | 378449993 | - | 1563914-1564087 | hypothetical protein                                  | 1553937-1554110 | - | 174 |
| 140285 | STM14_1786  | 378449996 | + | 1565234-1565359 | hypothetical protein                                  | 1555256-1555381 | + | 126 |
| 140285 | STM14_1790  | 378450000 | + | 1569946-1570116 | hypothetical protein                                  | 1559968-1560138 | + | 171 |
| 140285 | STM14_1794  | 378450004 | - | 1571734-1572027 | hypothetical protein                                  | 1561756-1562049 | - | 294 |
| 140285 | STM14_1796  | 378450006 | - | 1572462-1572653 | hypothetical protein                                  | 1562484-1562675 | - | 192 |

|         |                |           |   |                 |                                                 |                 |   |     |
|---------|----------------|-----------|---|-----------------|-------------------------------------------------|-----------------|---|-----|
| T000240 | STMDT12_C14990 | 378984040 | + | 1560231-1560323 | hypothetical protein                            | 1562542-1562634 | + | 93  |
| 140285  | STM14_1810     | 378450020 | - | 1586812-1587033 | putative dimethyl sulfoxide reductase subunit A | 1576834-1577055 | - | 222 |
| 140285  | STM14_1816     | 378450026 | - | 1591641-1591757 | hypothetical protein                            | 1581663-1581779 | - | 117 |
| ST474   | STM474_1518    | 379700677 | - | 1542834-1542947 | hypothetical protein                            | 1585980-1586093 | - | 114 |
| 140285  | STM14_1827     | 378450036 | - | 1601704-1601919 | hypothetical protein                            | 1591726-1591941 | - | 216 |
| 140285  | STM14_1828     | 378450037 | + | 1601786-1601923 | peptidyl-dipeptidase dcp                        | 1591808-1591945 | + | 138 |
| 140285  | STM14_1831     | 378450040 | - | 1602970-1603068 | hypothetical protein                            | 1592992-1593090 | - | 99  |
| T000240 | STMDT12_C15310 | 378984072 | - | 1591761-1591856 | hypothetical protein                            | 1594071-1594166 | - | 96  |
| 140285  | STM14_1847     | 378450056 | + | 1615524-1615850 | putative inner membrane protein                 | 1605547-1605873 | + | 327 |
| 140285  | STM14_1858     | 378450067 | - | 1625009-1625161 | hypothetical protein                            | 1615032-1615184 | - | 153 |
| 140285  | STM14_1867     | 378450076 | - | 1634718-1634879 | hypothetical protein                            | 1624741-1624902 | - | 162 |
| 140285  | STM14_1872     | 378450081 | + | 1637216-1637431 | putative phage-related secreted protein         | 1627239-1627454 | + | 216 |
| UK1     | STMUK_1520     | 378988892 | + | 1587048-1587440 | hypothetical protein                            | 1628880-1629272 | + | 393 |
| UK1     | STMUK_1521     | 378988893 | + | 1587577-1587705 | hypothetical protein                            | 1629409-1629537 | + | 129 |
| ST474   | STM474_1578    | 379700736 | - | 1602385-1602519 | hypothetical protein                            | 1645532-1645666 | - | 135 |
| 140285  | STM14_1890     | 378450098 | + | 1657503-1657634 | hypothetical protein                            | 1647526-1647657 | + | 132 |
| 140285  | STM14_1895     | 378450103 | + | 1663489-1663641 | hypothetical protein                            | 1653512-1653664 | + | 153 |
| 140285  | STM14_1897     | 378450105 | - | 1664885-1665067 | hypothetical protein                            | 1654908-1655090 | - | 183 |
| 140285  | STM14_1902     | 378450110 | + | 1668962-1669093 | hypothetical protein                            | 1658986-1659117 | + | 132 |
| 140285  | STM14_1904     | 378450112 | - | 1670559-1670702 | hypothetical protein                            | 1660583-1660726 | - | 144 |
| 140285  | STM14_1911     | 378450119 | - | 1679194-1679457 | hypothetical protein                            | 1669218-1669481 | - | 264 |
| 140285  | STM14_1914     | 378450122 | - | 1680335-1680472 | hypothetical protein                            | 1670358-1670495 | - | 138 |
| 140285  | STM14_1915     | 378450123 | + | 1680342-1680476 | hypothetical protein                            | 1670365-1670499 | + | 135 |
| 140285  | STM14_1919     | 378450127 | - | 1683664-1683783 | hypothetical protein                            | 1673687-1673806 | - | 120 |
| 140285  | STM14_1922     | 378450130 | + | 1686850-1686969 | hypothetical protein                            | 1676873-1676992 | + | 120 |
| 140285  | STM14_1923     | 378450131 | - | 1686958-1687080 | hypothetical protein                            | 1676981-1677103 | - | 123 |
| 140285  | STM14_1932     | 410023183 | + | 1696611-1696706 | hypothetical protein                            | 1686634-1686729 | + | 96  |
| 140285  | STM14_1933     | 378450141 | + | 1696703-1696807 | hypothetical protein                            | 1686726-1686830 | + | 105 |
| 140285  | STM14_1937     | 378450145 | - | 1700960-1701190 | putative inner membrane protein                 | 1690983-1691213 | - | 231 |
| 140285  | STM14_1939     | 378450147 | - | 1701681-1701785 | hypothetical protein                            | 1691704-1691808 | - | 105 |
| 140285  | STM14_1950     | 378450158 | + | 1711642-1711749 | hypothetical protein                            | 1701665-1701772 | + | 108 |
| 140285  | STM14_1961     | 378450169 | + | 1719701-1719814 | hypothetical protein                            | 1709724-1709837 | + | 114 |
| 140285  | STM14_1967     | 378450175 | + | 1727480-1727695 | hypothetical protein                            | 1717503-1717718 | + | 216 |
| 140285  | STM14_1970     | 378450178 | + | 1729598-1729999 | putative dipicolinate reductase                 | 1719621-1720022 | + | 402 |
| T000240 | STMDT12_C16480 | 378984189 | - | 1717552-1717677 | hypothetical protein                            | 1719861-1719986 | - | 126 |
| ST474   | STM474_1641    | 379700799 | + | 1676859-1677014 | hypothetical protein                            | 1720006-1720161 | + | 156 |
| 140285  | STM14_1972     | 378450180 | - | 1731028-1731132 | hypothetical protein                            | 1721051-1721155 | - | 105 |
| 140285  | STM14_1973     | 378450181 | + | 1731115-1731225 | hypothetical protein                            | 1721138-1721248 | + | 111 |
| 140285  | STM14_1976     | 378450184 | - | 1733662-1733814 | hypothetical protein                            | 1723685-1723837 | - | 153 |
| T000240 | STMDT12_C16570 | 378984198 | - | 1726118-1726213 | hypothetical protein                            | 1728427-1728522 | - | 96  |
| 140285  | STM14_1996     | 378450204 | - | 1755685-1755894 | hypothetical protein                            | 1745708-1745917 | - | 210 |
| T000240 | STMDT12_C16740 | 378984215 | - | 1744637-1744789 | hypothetical protein                            | 1746946-1747098 | - | 153 |
| 140285  | STM14_2004     | 378450212 | - | 1762419-1762580 | hypothetical protein                            | 1752442-1752603 | - | 162 |
| 140285  | STM14_2024     | 378450229 | - | 1779789-1779902 | hypothetical protein                            | 1769811-1769924 | - | 114 |
| 140285  | STM14_2048     | 378450253 | - | 1800491-1800637 | hypothetical protein                            | 1789802-1789948 | - | 147 |
| 140285  | STM14_2049     | 378450254 | + | 1800647-1800769 | hypothetical protein                            | 1789958-1790080 | + | 123 |
| 140285  | STM14_2054     | 378450259 | - | 1803682-1803798 | hypothetical protein                            | 1792993-1793109 | - | 117 |
| 140285  | STM14_2057     | 378450262 | + | 1807079-1807216 | hypothetical protein                            | 1796390-1796527 | + | 138 |
| 140285  | STM14_2061     | 378450266 | - | 1810467-1810628 | hypothetical protein                            | 1799778-1799939 | - | 162 |
| 140285  | STM14_2065     | 378450270 | + | 1812029-1812142 | hypothetical protein                            | 1801340-1801453 | + | 114 |
| 140285  | STM14_2071     | 378450276 | - | 1818504-1818674 | hypothetical protein                            | 1807815-1807985 | - | 171 |
| ST474   | ymia           | 379700885 | - | 1764839-1764967 | hypothetical protein                            | 1807986-1808114 | - | 129 |
| 140285  | STM14_2073     | 378450278 | + | 1820026-1820190 | hypothetical protein                            | 1809337-1809501 | + | 165 |
| 140285  | STM14_2076     | 378450281 | - | 1823233-1823364 | hypothetical protein                            | 1812544-1812675 | - | 132 |
| 140285  | STM14_2079     | 378450284 | + | 1824904-1825014 | hypothetical protein                            | 1814215-1814325 | + | 111 |
| 140285  | STM14_2102     | 378450306 | - | 1843241-1843414 | hypothetical protein                            | 1832552-1832725 | - | 174 |
| 140285  | STM14_2111     | 378450314 | + | 1851996-1852310 | putative inner membrane protein                 | 1841307-1841621 | + | 315 |
| 140285  | STM14_2117     | 378450320 | + | 1858398-1858580 | hypothetical protein                            | 1847709-1847891 | + | 183 |
| 140285  | STM14_2123     | 378450326 | - | 1863160-1863279 | hypothetical protein                            | 1852471-1852590 | - | 120 |
| 140285  | STM14_2128     | 378450328 | + | 1865980-1866144 | hypothetical protein                            | 1855291-1855455 | + | 165 |
| 140285  | STM14_2133     | 378450333 | + | 1872924-1873043 | hypothetical protein                            | 1862235-1862354 | + | 120 |
| 140285  | STM14_2135     | 378450335 | - | 1874718-1874903 | hypothetical protein                            | 1864029-1864214 | - | 186 |
| 140285  | STM14_2148     | 378450348 | - | 1886567-1886695 | hypothetical protein                            | 1875878-1876006 | - | 129 |
| 140285  | STM14_2151     | 378450351 | - | 1888181-1888351 | hypothetical protein                            | 1877492-1877662 | - | 171 |
| 140285  | STM14_2152     | 378450352 | - | 1888329-1888433 | hypothetical protein                            | 1877640-1877744 | - | 105 |
| 140285  | STM14_2158     | 378450358 | - | 1893588-1893701 | hypothetical protein                            | 1882899-1883012 | - | 114 |
| 140285  | STM14_2160     | 378450360 | - | 1895293-1895421 | hypothetical protein                            | 1884604-1884732 | - | 129 |
| 140285  | STM14_2171     | 378450371 | - | 1905555-1905662 | hypothetical protein                            | 1894866-1894973 | - | 108 |
| 140285  | STM14_2180     | 378450380 | - | 1914824-1914934 | hypothetical protein                            | 1904135-1904245 | - | 111 |
| 140285  | STM14_2187     | 378450387 | + | 1920441-1920557 | hypothetical protein                            | 1909752-1909868 | + | 117 |
| 140285  | STM14_2189     | 378450389 | - | 1920801-1920899 | hypothetical protein                            | 1910112-1910210 | - | 99  |
| 140285  | STM14_2200     | 378450400 | + | 1928329-1928535 | hypothetical protein                            | 1916927-1917133 | + | 207 |
| 140285  | STM14_2219     | 378450419 | - | 1946749-1946859 | hypothetical protein                            | 1935344-1935454 | - | 111 |
| 140285  | STM14_2222     | 378450422 | + | 1947434-1947541 | hypothetical protein                            | 1936029-1936136 | + | 108 |
| 140285  | STM14_2223     | 378450423 | + | 1947556-1947696 | hypothetical protein                            | 1936151-1936291 | + | 141 |
| 140285  | STM14_2224     | 378450424 | - | 1947624-1947740 | hypothetical protein                            | 1936219-1936335 | - | 117 |
| T000240 | STMDT12_C18620 | 378984403 | - | 1934900-1935001 | hypothetical protein                            | 1937555-1937656 | - | 102 |
| 140285  | STM14_2229     | 378450429 | - | 1949871-1949978 | hypothetical protein                            | 1938466-1938573 | - | 108 |
| 140285  | STM14_2238     | 378450438 | + | 1961391-1961522 | hypothetical protein                            | 1949986-1950117 | + | 132 |
| ST474   | STM474_1877    | 379701031 | - | 1908925-1909098 | hypothetical protein                            | 1951357-1951530 | - | 174 |
| 140285  | STM14_2243     | 378450443 | + | 1963183-1963311 | hypothetical protein                            | 1951778-1951906 | + | 129 |
| 140285  | STM14_2245     | 378450445 | + | 1964429-1964551 | hypothetical protein                            | 1953024-1953146 | + | 123 |
| 140285  | STM14_2246     | 378450446 | - | 1964644-1964787 | hypothetical protein                            | 1953239-1953382 | - | 144 |
| D23580  | STMMW_18461    | 378445260 | + | 1947071-1947241 | hypothetical protein                            | 1953841-1954011 | + | 171 |
| 140285  | STM14_2250     | 378450450 | - | 1966960-1967154 | hypothetical protein                            | 1955555-1955749 | - | 129 |
| ST474   | STM474_1884    | 379701038 | - | 1913724-1913852 | hypothetical protein                            | 1956156-1956284 | - | 195 |
| 140285  | STM14_2255     | 378450453 | - | 1970094-1970294 | hypothetical protein                            | 1958689-1958889 | - | 201 |
| 140285  | STM14_2260     | 378450457 | - | 1973190-1973366 | hypothetical protein                            | 1961785-1961961 | - | 177 |
| 140285  | STM14_2261     | 378450458 | + | 1973229-1973375 | hypothetical protein                            | 1961824-1961970 | + | 147 |
| ST474   | STM474_1893    | 379701046 | - | 1920052-1920177 | arsenical pump membrane protein                 | 1962484-1962609 | - | 126 |
| 140285  | STM14_2263     | 378450459 | - | 1973981-1974151 | hypothetical protein                            | 1962576-1962746 | - | 171 |
| 140285  | STM14_2264     | 378450460 | + | 1974277-1974393 | tail fiber assembly protein                     | 1962872-1962988 | + | 117 |
| 140285  | STM14_2268     | 378450464 | + | 1976235-1976423 | hypothetical protein                            | 1964830-1965018 | + | 189 |

|         |                |           |   |                 |                                 |                 |   |     |
|---------|----------------|-----------|---|-----------------|---------------------------------|-----------------|---|-----|
| 140285  | STM14_2270     | 378450466 | + | 1976705-1976878 | hypothetical protein            | 1965300-1965473 | + | 174 |
| 140285  | STM14_2271     | 378450467 | + | 1976808-1976927 | hypothetical protein            | 1965403-1965522 | + | 120 |
| 140285  | STM14_2276     | 378450471 | - | 1979312-1979440 | hypothetical protein            | 1967907-1968035 | - | 129 |
| T000240 | STMDT12_C19080 | 378984449 | + | 1972383-1972478 | hypothetical protein            | 1976842-1976937 | + | 96  |
| 140285  | STM14_2291     | 378450486 | - | 1990827-1990985 | hypothetical protein            | 1979422-1979580 | - | 159 |
| 140285  | STM14_2293     | 378450488 | + | 1992662-1992787 | hypothetical protein            | 1981257-1981382 | + | 126 |
| 140285  | STM14_2294     | 378450489 | - | 1992755-1992874 | hypothetical protein            | 1981350-1981469 | - | 120 |
| 140285  | STM14_2298     | 378450493 | + | 1996367-1996594 | hypothetical protein            | 1984962-1985189 | + | 228 |
| 140285  | STM14_2305     | 378450500 | + | 2002147-2002269 | hypothetical protein            | 1990742-1990864 | + | 123 |
| 140285  | STM14_2306     | 378450501 | - | 2002264-2002389 | hypothetical protein            | 1990859-1990984 | - | 126 |
| 140285  | STM14_2313     | 378450507 | + | 2008446-2008562 | hypothetical protein            | 1997042-1997158 | + | 117 |
| 140285  | STM14_2321     | 378450515 | + | 2013869-2013985 | hypothetical protein            | 2002465-2002581 | + | 117 |
| 140285  | STM14_2323     | 378450517 | + | 2015793-2015897 | hypothetical protein            | 2004389-2004493 | + | 105 |
| 140285  | STM14_2329     | 378450523 | + | 2022930-2023187 | hypothetical protein            | 2011526-2011783 | + | 258 |
| 140285  | STM14_2339     | 378450533 | - | 2032400-2032531 | hypothetical protein            | 2020996-2021127 | - | 132 |
| 140285  | STM14_2342     | 378450536 | - | 2033684-2033827 | hypothetical protein            | 2022280-2022423 | - | 144 |
| 140285  | STM14_2343     | 378450537 | + | 2034145-2034261 | hypothetical protein            | 2022741-2022857 | + | 117 |
| 140285  | STM14_2349     | 378450542 | + | 2038156-2038305 | hypothetical protein            | 2026751-2026900 | + | 150 |
| T000240 | STMDT12_C19550 | 378984496 | - | 2022485-2022580 | hypothetical protein            | 2026944-2027039 | - | 96  |
| D23580  | STMMW_19262    | 378445334 | - | 2022476-2022553 | hypothetical protein            | 2038966-2039043 | - | 78  |
| 140285  | STM14_2366     | 378450556 | + | 2050620-2050775 | putative inner membrane protein | 2039215-2039370 | + | 156 |
| 140285  | STM14_2379     | 378450569 | - | 2060568-2060705 | hypothetical protein            | 2049163-2049300 | - | 138 |
| 140285  | STM14_2389     | 378450579 | - | 2067774-2067902 | hypothetical protein            | 2056369-2056497 | - | 129 |
| 140285  | STM14_2411     | 378450600 | + | 2084253-2084468 | hypothetical protein            | 2072848-2073063 | + | 216 |
| ST474   | STM474_2026    | 379701174 | + | 2034563-2034694 | hypothetical protein            | 2076995-2077126 | + | 132 |
| 140285  | STM14_2417     | 378450606 | + | 2088843-2088962 | hypothetical protein            | 2077438-2077557 | + | 120 |
| 140285  | STM14_2419     | 378450608 | - | 2090431-2090643 | putative cold-shock protein     | 2079026-2079238 | - | 213 |
| 140285  | STM14_2421     | 378450610 | - | 2091089-2091208 | hypothetical protein            | 2079684-2079803 | - | 120 |
| 140285  | STM14_2425     | 378450614 | - | 2093253-2093495 | hypothetical protein            | 2081848-2082090 | - | 243 |
| T000240 | STMDT12_C20240 | 378984565 | - | 2079358-2079462 | hypothetical protein            | 2083817-2083921 | - | 105 |
| SL1344  | SL1344_1980    | 378699918 | + | 2082737-2083009 | hypothetical protein            | 2085022-2085294 | + | 273 |
| ST474   | STM474_2085    | 379701227 | - | 2082744-2082878 | hypothetical protein            | 2085029-2085163 | - | 135 |
| ST474   | STM474_2089    | 379701231 | + | 2088148-2088282 | hypothetical protein            | 2090433-2090567 | + | 135 |
| 798     | UMN798_2172    | 383496723 | - | 2087536-2087634 | hypothetical protein            | 2090460-2090558 | - | 99  |
| T000240 | STMDT12_C20320 | 378984573 | + | 2086418-2086567 | hypothetical protein            | 2090877-2091026 | + | 150 |
| 140285  | STM14_2494     | 378450678 | - | 2142487-2142741 | hypothetical protein            | 2090936-2091190 | - | 255 |
| ST474   | STM474_2091    | 379701233 | + | 2088820-2088942 | hypothetical protein            | 2091105-2091227 | + | 123 |
| D23580  | STMMW_20421    | 378445447 | + | 2116462-2116623 | hypothetical protein            | 2092807-2092968 | + | 162 |
| 140285  | STM14_2497     | 378450681 | - | 2144828-2145214 | hypothetical protein            | 2093277-2093663 | - | 387 |
| 140285  | STM14_2501     | 378450684 | - | 2147387-2147539 | hypothetical protein            | 2095836-2095988 | - | 153 |
| 140285  | STM14_2524     | 378450706 | - | 2165668-2165799 | hypothetical protein            | 2114117-2114248 | - | 132 |
| 140285  | STM14_2549     | 378450731 | - | 2185570-2185701 | hypothetical protein            | 2134018-2134149 | - | 132 |
| 140285  | STM14_2556     | 378450738 | - | 2192950-2193219 | hypothetical protein            | 2141398-2141667 | - | 270 |
| 140285  | STM14_2558     | 378450740 | - | 2195674-2195796 | hypothetical protein            | 2144122-2144244 | - | 123 |
| 140285  | STM14_2561     | 378450743 | + | 2198729-2198896 | hypothetical protein            | 2147177-2147344 | + | 168 |
| 140285  | STM14_2562     | 378450744 | - | 2198740-2198937 | hypothetical protein            | 2147188-2147385 | - | 198 |
| 140285  | STM14_2599     | 378450781 | + | 2239941-2240216 | hypothetical protein            | 2188389-2188664 | + | 276 |
| 140285  | STM14_2614     | 378450796 | + | 2254277-2254522 | hypothetical protein            | 2202724-2202969 | + | 246 |
| 140285  | STM14_2619     | 378450801 | - | 2259828-2259998 | hypothetical protein            | 2208275-2208445 | - | 171 |
| 140285  | STM14_2623     | 378450805 | - | 2265633-2265749 | hypothetical protein            | 2214080-2214196 | - | 117 |
| 140285  | STM14_2635     | 378450816 | - | 2282708-2282821 | hypothetical protein            | 2231155-2231268 | - | 114 |
| 140285  | STM14_2639     | 378450819 | + | 2285114-2285233 | hypothetical protein            | 2233561-2233680 | + | 120 |
| 140285  | STM14_2649     | 378450829 | - | 2293497-2293682 | hypothetical protein            | 2241944-2242129 | - | 186 |
| 140285  | STM14_2651     | 378450831 | - | 2294185-2294343 | hypothetical protein            | 2242632-2242790 | - | 159 |
| ST474   | STM474_2254    | 379701393 | + | 2258581-2258763 | hypothetical protein            | 2260865-2261047 | + | 183 |
| 140285  | STM14_2671     | 378450851 | - | 2315124-2315237 | hypothetical protein            | 2263571-2263684 | - | 114 |
| 140285  | STM14_2674     | 378450854 | - | 2317916-2318191 | hypothetical protein            | 2266363-2266638 | - | 276 |
| 140285  | STM14_2676     | 378450856 | + | 2318810-2318917 | hypothetical protein            | 2267257-2267364 | + | 108 |
| 140285  | STM14_2680     | 378450860 | + | 2322009-2322206 | hypothetical protein            | 2270456-2270653 | + | 198 |
| 140285  | STM14_2697     | 378450877 | + | 2338065-2338184 | hypothetical protein            | 2286512-2286631 | + | 120 |
| 140285  | STM14_0363     | 378448623 | - | 352120-352227   | hypothetical protein            | 2287791-2287898 | + | 108 |
| 140285  | STM14_2701     | 378450881 | + | 2340683-2340847 | hypothetical protein            | 2289130-2289294 | + | 165 |
| 140285  | STM14_2704     | 378450884 | - | 2342649-2342762 | hypothetical protein            | 2291096-2291209 | - | 114 |
| 140285  | STM14_2705     | 378450885 | - | 2342720-2342848 | hypothetical protein            | 2291167-2291295 | - | 129 |
| 140285  | STM14_2706     | 378450886 | + | 2342834-2343067 | hypothetical protein            | 2291281-2291514 | + | 234 |
| 140285  | STM14_2710     | 378450890 | - | 2345635-2345787 | hypothetical protein            | 2294081-2294233 | - | 153 |
| 140285  | STM14_2716     | 378450896 | - | 2351963-2352097 | hypothetical protein            | 2300410-2300544 | - | 135 |
| 140285  | STM14_2718     | 378450898 | - | 2352991-2353110 | hypothetical protein            | 2301438-2301557 | - | 120 |
| ST474   | STM474_2293    | 379701432 | - | 2300273-2300395 | hypothetical protein            | 2302557-2302679 | - | 123 |
| 140285  | STM14_2724     | 378450904 | + | 2358928-2359059 | hypothetical protein            | 2307375-2307506 | + | 132 |
| UK1     | STMUK_2237     | 378989594 | - | 2307167-2307274 | hypothetical protein            | 2307422-2307529 | - | 108 |
| 140285  | STM14_2725     | 378450905 | + | 2359144-2359266 | hypothetical protein            | 2307591-2307713 | + | 123 |
| 140285  | STM14_2726     | 378450906 | - | 2359149-2359277 | hypothetical protein            | 2307596-2307724 | - | 129 |
| 140285  | STM14_2730     | 378450910 | - | 2361472-2361576 | hypothetical protein            | 2309919-2310023 | - | 105 |
| 140285  | STM14_2736     | 378450915 | - | 2364975-2365205 | hypothetical protein            | 2313422-2313652 | - | 231 |
| 140285  | STM14_2738     | 378450917 | + | 2365897-2366040 | hypothetical protein            | 2314344-2314487 | + | 144 |
| 140285  | STM14_2750     | 378450929 | - | 2378246-2378392 | hypothetical protein            | 2326693-2326839 | - | 147 |
| T000240 | STMDT12_C22520 | 378984793 | - | 2327280-2327405 | hypothetical protein            | 2331737-2331862 | - | 126 |
| 140285  | STM14_2764     | 378450942 | - | 2389094-2389207 | hypothetical protein            | 2337541-2337654 | - | 114 |
| 140285  | STM14_2768     | 378450946 | - | 2392117-2392347 | KilA-N domain protein           | 2340564-2340794 | - | 231 |
| 140285  | STM14_2774     | 378450952 | + | 2397715-2397861 | hypothetical protein            | 2346162-2346308 | + | 147 |
| 140285  | STM14_2791     | 378450969 | + | 2411310-2411441 | hypothetical protein            | 2359757-2359888 | + | 132 |
| 140285  | STM14_2798     | 378450976 | + | 2418131-2418256 | hypothetical protein            | 2366578-2366703 | + | 126 |
| 140285  | STM14_2803     | 378450980 | - | 2425164-2425280 | hypothetical protein            | 2373611-2373727 | - | 117 |
| 140285  | STM14_2805     | 378450982 | + | 2427980-2428210 | hypothetical protein            | 2376427-2376657 | + | 231 |
| 140285  | STM14_2806     | 378450983 | + | 2428153-2428293 | hypothetical protein            | 2376600-2376740 | + | 141 |
| 140285  | STM14_2811     | 378450988 | + | 2432657-2432773 | hypothetical protein            | 2381104-2381220 | + | 117 |
| 140285  | STM14_2822     | 378450999 | + | 2445948-2446052 | hypothetical protein            | 2394395-2394499 | + | 105 |
| 140285  | STM14_2823     | 378451000 | + | 2446155-2446358 | hypothetical protein            | 2394602-2394805 | + | 204 |
| 140285  | STM14_2834     | 378451011 | + | 2455277-2455405 | hypothetical protein            | 2403724-2403852 | + | 129 |
| ST474   | STM474_2412    | 379701547 | - | 2421293-2421412 | hypothetical protein            | 2423577-2423696 | - | 120 |
| 140285  | STM14_2854     | 378451030 | - | 2475407-2475529 | hypothetical protein            | 2423855-2423977 | - | 123 |
| 140285  | STM14_2855     | 378451031 | + | 2475538-2475645 | hypothetical protein            | 2423986-2424093 | + | 108 |

|         |                |           |   |                 |                                                               |                 |   |     |
|---------|----------------|-----------|---|-----------------|---------------------------------------------------------------|-----------------|---|-----|
| 14028S  | STM14_2856     | 378451032 | + | 2475654-2475836 | hypothetical protein                                          | 2424102-2424284 | + | 183 |
| 14028S  | STM14_2870     | 378451046 | + | 2491031-2491153 | hypothetical protein                                          | 2439479-2439601 | + | 123 |
| 14028S  | STM14_2871     | 378451047 | - | 2491241-2491357 | hypothetical protein                                          | 2439689-2439805 | - | 117 |
| 14028S  | STM14_2880     | 378451056 | - | 2499179-2499430 | hypothetical protein                                          | 2447627-2447878 | - | 252 |
| 14028S  | STM14_2881     | 378451057 | + | 2499320-2499454 | hypothetical protein                                          | 2447768-2447902 | + | 135 |
| 14028S  | STM14_2902     | 378451078 | + | 2517875-2518045 | hypothetical protein                                          | 2466323-2466493 | + | 171 |
| 14028S  | STM14_2911     | 378451087 | - | 2527947-2528102 | hypothetical protein                                          | 2476395-2476550 | - | 156 |
| 14028S  | STM14_2921     | 378451097 | + | 2537322-2537438 | hypothetical protein                                          | 2485770-2485886 | + | 117 |
| 14028S  | STM14_2940     | 378451116 | + | 2553683-2553823 | hypothetical protein                                          | 2502131-2502271 | + | 141 |
| 14028S  | STM14_2941     | 378451117 | - | 2553820-2553948 | hypothetical protein                                          | 2502268-2502396 | - | 129 |
| T000240 | STMDT12_C24200 | 378984961 | + | 2507125-2507337 | hypothetical protein                                          | 2511582-2511794 | + | 213 |
| 14028S  | STM14_2952     | 378451127 | - | 2565752-2565865 | hypothetical protein                                          | 2514200-2514313 | - | 114 |
| 14028S  | STM14_2955     | 378451130 | - | 2569137-2569283 | hypothetical protein                                          | 2517585-2517731 | - | 147 |
| 14028S  | STM14_2959     | 378451134 | + | 2573587-2573775 | hypothetical protein                                          | 2522035-2522223 | + | 189 |
| 14028S  | STM14_2986     | 378451155 | + | 2595762-2595923 | hypothetical protein                                          | 2544210-2544371 | + | 162 |
| 14028S  | STM14_2987     | 410023203 | - | 2595873-2595998 | hypothetical protein                                          | 2544321-2544446 | - | 126 |
| 14028S  | STM14_2988     | 378451157 | + | 2595966-2596094 | hypothetical protein                                          | 2544414-2544542 | + | 129 |
| 14028S  | STM14_3032     | 378451201 | + | 2633812-2634012 | hypothetical protein                                          | 2582260-2582460 | + | 201 |
| 14028S  | STM14_3036     | 378451205 | - | 2637342-2637476 | hypothetical protein                                          | 2585790-2585924 | - | 135 |
| 14028S  | STM14_3040     | 378451209 | + | 2640806-2640913 | hypothetical protein                                          | 2589254-2589361 | + | 108 |
| 14028S  | STM14_3043     | 378451212 | - | 2645096-2645227 | hypothetical protein                                          | 2593544-2593675 | - | 132 |
| 14028S  | STM14_3063     | 378451232 | - | 2664349-2664552 | hypothetical protein                                          | 2612797-2613000 | - | 204 |
| 14028S  | STM14_3069     | 378451238 | - | 2672447-2672584 | putative cytoplasmic protein                                  | 2620895-2621032 | - | 138 |
| 14028S  | STM14_3072     | 378451241 | - | 2673033-2673269 | putative inner membrane protein                               | 2621481-2621717 | - | 237 |
| T000240 | STMDT12_C25240 | 378985065 | + | 2617191-2617382 | putative cytoplasmic protein                                  | 2621767-2621958 | + | 192 |
| 14028S  | STM14_3079     | 378451248 | + | 2685671-2685784 | hypothetical protein                                          | 2634118-2634231 | + | 114 |
| 14028S  | STM14_3080     | 378451249 | + | 2685675-2685857 | hypothetical protein                                          | 2634122-2634304 | + | 183 |
| 14028S  | STM14_3081     | 378451250 | - | 2685854-2685967 | hypothetical protein                                          | 2634301-2634414 | - | 114 |
| ST474   | STM474_2618    | 379701745 | + | 2646222-2646344 | hypothetical protein                                          | 2648506-2648628 | + | 123 |
| 14028S  | STM14_3086     | 378451254 | + | 2702354-2702470 | hypothetical protein                                          | 2650802-2650918 | + | 117 |
| 14028S  | STM14_3087     | 378451255 | - | 2702529-2702684 | hypothetical protein                                          | 2650977-2651132 | - | 156 |
| 14028S  | STM14_3090     | 378451258 | + | 2704480-2704581 | hypothetical protein                                          | 2652928-2653029 | + | 102 |
| 14028S  | STM14_3096     | 378451264 | - | 2710094-2710216 | type IV pilus biogenesis/stability protein PilW               | 2658542-2658664 | - | 123 |
| 14028S  | STM14_3099     | 378451267 | + | 2712052-2712147 | hypothetical protein                                          | 2660500-2660595 | + | 96  |
| 14028S  | STM14_3107     | 378451275 | - | 2725280-2725504 | hypothetical protein                                          | 2673728-2673952 | - | 225 |
| ST474   | STM474_2636    | 379701763 | + | 2671480-2671593 | hypothetical protein                                          | 2673764-2673877 | + | 114 |
| 14028S  | STM14_3109     | 378451277 | - | 2726253-2726387 | hypothetical protein                                          | 2674701-2674835 | - | 135 |
| 14028S  | STM14_3122     | 378451290 | + | 2735856-2735978 | hypothetical protein                                          | 2684303-2684425 | + | 123 |
| 14028S  | STM14_3123     | 378451291 | - | 2735883-2735993 | hypothetical protein                                          | 2684330-2684440 | - | 111 |
| 14028S  | STM14_3134     | 378451302 | - | 2746625-2746771 | hypothetical protein                                          | 2695072-2695218 | - | 147 |
| 14028S  | STM14_3144     | 378451312 | + | 2759420-2759548 | hypothetical protein                                          | 2707867-2707995 | + | 129 |
| 14028S  | STM14_3165     | 378451333 | - | 2782226-2782354 | hypothetical protein                                          | 2730673-2730801 | - | 129 |
| ST474   | STM474_2692    | 379701819 | - | 2729509-2729628 | integrase, catalytic region                                   | 2731822-2731941 | - | 120 |
| SL1344  | SL1344_2548    | 378700486 | - | 2730253-2730318 | bacteriophage protein                                         | 2732566-2732631 | - | 66  |
| D23580  | STMMW_26031    | 378446002 | - | 2757050-2757262 | putative prophage protein                                     | 2732694-2732906 | - | 213 |
| 14028S  | STM14_3171     | 410023208 | - | 2788681-2788923 | hypothetical protein                                          | 2737152-2737394 | - | 243 |
| 14028S  | STM14_1473     | 378449695 | - | 1321447-1322052 | hypothetical protein                                          | 2741548-2742153 | + | 606 |
| 14028S  | STM14_3202     | 378451368 | - | 2814160-2814285 | hypothetical protein                                          | 2762624-2762749 | - | 126 |
| 14028S  | STM14_3206     | 378451372 | - | 2815861-2816061 | hypothetical protein                                          | 2764325-2764525 | - | 201 |
| 14028S  | STM14_3229     | 378451395 | + | 2830868-2831005 | hypothetical protein                                          | 2777034-2777171 | + | 138 |
| 14028S  | STM14_3230     | 378451396 | - | 2831002-2831118 | hypothetical protein                                          | 2777168-2777284 | - | 117 |
| 14028S  | STM14_3235     | 378451401 | - | 2833834-2833998 | hypothetical protein                                          | 2780000-2780164 | - | 165 |
| 14028S  | STM14_3236     | 378451402 | - | 2833998-2834177 | hypothetical protein                                          | 2780164-2780343 | - | 180 |
| 14028S  | STM14_3239     | 378451405 | - | 2836525-2836725 | putative methyltransferase                                    | 2782691-2782891 | - | 201 |
| 14028S  | STM14_3249     | 378451415 | + | 2846371-2846505 | hypothetical protein                                          | 2792537-2792671 | + | 135 |
| 14028S  | STM14_3259     | 378451420 | + | 2855709-2855837 | hypothetical protein                                          | 2801792-2801920 | + | 129 |
| 14028S  | STM14_3260     | 378451421 | + | 2855915-2856031 | hypothetical protein                                          | 2801998-2802114 | + | 117 |
| 14028S  | STM14_3267     | 378451427 | + | 2861933-2862097 | hypothetical protein                                          | 2808016-2808180 | + | 165 |
| 14028S  | STM14_3272     | 378451432 | + | 2866577-2866735 | hypothetical protein                                          | 2812660-2812818 | + | 159 |
| 14028S  | STM14_3273     | 378451433 | - | 2866637-2866750 | hypothetical protein                                          | 2812720-2812833 | - | 114 |
| 14028S  | STM14_3280     | 378451440 | - | 2870862-2871008 | hypothetical protein                                          | 2816945-2817091 | - | 147 |
| 14028S  | STM14_3282     | 378451442 | + | 2872506-2872700 | putative cytochrome c-type biogenesis protein (heme exporter) | 2818589-2818783 | + | 195 |
| 14028S  | STM14_3291     | 378451450 | - | 2879362-2879469 | hypothetical protein                                          | 2825445-2825552 | - | 108 |
| 14028S  | STM14_3295     | 378451454 | + | 2881056-2881160 | hypothetical protein                                          | 2827139-2827243 | + | 105 |
| 14028S  | STM14_3296     | 378451455 | - | 2881388-2881540 | hypothetical protein                                          | 2827471-2827623 | - | 153 |
| ST474   | STM474_2816    | 379701937 | + | 2855546-2855689 | hypothetical protein                                          | 2844357-2844500 | + | 144 |
| 14028S  | STM14_3309     | 378451467 | + | 2905915-2906040 | hypothetical protein                                          | 2885690-2885815 | + | 126 |
| 14028S  | STM14_3312     | 378451470 | - | 2908421-2908582 | hypothetical protein                                          | 2888196-2888357 | - | 162 |
| 14028S  | STM14_3324     | 378451481 | - | 2917712-2917867 | hypothetical protein                                          | 2897487-2897642 | - | 156 |
| 14028S  | STM14_3326     | 378451483 | - | 2919626-2919739 | hypothetical protein                                          | 2899401-2899514 | - | 114 |
| ST474   | STM474_2898    | 379702018 | - | 2927700-2927858 | hypothetical protein                                          | 2905134-2905292 | - | 159 |
| T000240 | STMDT12_C28220 | 378985362 | - | 2935935-2936111 | hypothetical protein                                          | 2912369-2912545 | - | 177 |
| 14028S  | STM14_3340     | 378451496 | + | 2935806-2935976 | hypothetical protein                                          | 2915571-2915741 | + | 171 |
| 14028S  | STM14_3341     | 378451497 | - | 2936002-2936229 | hypothetical protein                                          | 2915767-2915994 | - | 228 |
| 14028S  | STM14_3342     | 378451498 | - | 2936297-2936449 | hypothetical protein                                          | 2916062-2916214 | - | 153 |
| 14028S  | STM14_3343     | 378451499 | + | 2936325-2936507 | hypothetical protein                                          | 2916090-2916272 | + | 183 |
| D23580  | STMMW_27451    | 378446140 | - | 2919280-2919162 | putative inner membrane protein                               | 2926295-2926267 | - | 333 |
| 14028S  | STM14_3351     | 378451506 | + | 2948161-2948499 | hypothetical protein                                          | 2927926-2928264 | + | 339 |
| 14028S  | STM14_3353     | 378451508 | + | 2949636-2949833 | hypothetical protein                                          | 2929401-2929598 | + | 198 |
| 14028S  | STM14_3355     | 378451510 | - | 2950805-2950957 | hypothetical protein                                          | 2930570-2930722 | - | 153 |
| 14028S  | STM14_3356     | 378451511 | + | 2951059-2951226 | hypothetical protein                                          | 2930824-2930991 | + | 168 |
| 14028S  | STM14_3357     | 378451512 | + | 2951242-2951355 | hypothetical protein                                          | 2931007-2931120 | + | 114 |
| 14028S  | STM14_3364     | 378451519 | + | 2957937-2958050 | hypothetical protein                                          | 2937702-2937815 | + | 114 |
| 14028S  | STM14_3372     | 378451527 | + | 2965822-2965938 | hypothetical protein                                          | 2945587-2945703 | + | 117 |
| 14028S  | STM14_3378     | 378451533 | + | 2968220-2968345 | hypothetical protein                                          | 2947985-2948110 | + | 126 |
| 14028S  | STM14_3379     | 378451534 | + | 2968355-2968534 | hypothetical protein                                          | 2948120-2948299 | + | 180 |
| 14028S  | STM14_3382     | 378451537 | - | 2969378-2969494 | hypothetical protein                                          | 2949143-2949259 | - | 117 |
| 14028S  | STM14_3394     | 378451549 | + | 2979522-2979632 | hypothetical protein                                          | 2959287-2959397 | + | 111 |
| 14028S  | STM14_3396     | 378451551 | - | 2981060-2981167 | hypothetical protein                                          | 2960825-2960932 | - | 108 |
| 14028S  | STM14_3398     | 378451553 | - | 2981900-2982022 | hypothetical protein                                          | 2961665-2961787 | - | 123 |
| 14028S  | STM14_3411     | 378451561 | + | 2991063-2991173 | hypothetical protein                                          | 2970828-2970938 | + | 111 |
| 14028S  | STM14_3414     | 378451564 | + | 2994186-2994350 | hypothetical protein                                          | 2973951-2974115 | + | 165 |
| 14028S  | STM14_3415     | 378451565 | - | 2994269-2994475 | hypothetical protein                                          | 2974034-2974240 | - | 207 |

|         |                |           |   |                 |                                  |                 |   |     |
|---------|----------------|-----------|---|-----------------|----------------------------------|-----------------|---|-----|
| 140285  | STM14_3419     | 378451569 | + | 2996927-2997172 | hypothetical protein             | 2976692-2976937 | + | 246 |
| 140285  | STM14_3421     | 378451571 | + | 2998326-2998466 | hypothetical protein             | 2978091-2978231 | + | 141 |
| 140285  | STM14_3427     | 378451577 | - | 3001727-3001867 | hypothetical protein             | 2981492-2981632 | - | 141 |
| 140285  | STM14_3433     | 378451583 | - | 3007751-3007963 | hydrogenase maturation protein   | 2987516-2987728 | - | 213 |
| 140285  | STM14_3435     | 378451585 | - | 3010214-3010348 | hypothetical protein             | 2989979-2990113 | - | 135 |
| 140285  | STM14_3437     | 378451587 | - | 3010872-3011006 | hypothetical protein             | 2990637-2990771 | - | 135 |
| 140285  | STM14_3447     | 378451597 | - | 3019238-3019342 | hypothetical protein             | 2999003-2999107 | - | 105 |
| 140285  | STM14_3449     | 378451599 | + | 3019869-3020072 | hypothetical protein             | 2999634-2999837 | + | 204 |
| 140285  | STM14_3457     | 378451607 | + | 3026426-3026551 | hypothetical protein             | 3006188-3006313 | + | 126 |
| 140285  | STM14_3464     | 378451614 | + | 3032212-3032319 | hypothetical protein             | 3011975-3012082 | + | 108 |
| 140285  | STM14_3466     | 378451616 | - | 3033296-3033403 | hypothetical protein             | 3013059-3013166 | - | 108 |
| 140285  | STM14_3502     | 378451652 | - | 3066393-3066497 | hypothetical protein             | 3046156-3046260 | - | 105 |
| D23580  | STMMW_28661    | 378446261 | + | 3039872-3039979 | pathogenicity island 1 protein   | 3046884-3046991 | + | 108 |
| 140285  | STM14_3504     | 378451654 | - | 3067340-3067483 | hypothetical protein             | 3047103-3047246 | - | 144 |
| 140285  | STM14_3508     | 378451657 | + | 3068687-3068806 | hypothetical protein             | 3048450-3048569 | + | 120 |
| 140285  | STM14_3528     | 378451677 | + | 3087981-3088118 | hypothetical protein             | 3067744-3067881 | + | 138 |
| 140285  | STM14_3535     | 378451684 | - | 3092010-3092120 | hypothetical protein             | 3071773-3071883 | - | 111 |
| 140285  | STM14_3549     | 378451698 | - | 3106978-3107112 | hypothetical protein             | 3086802-3086936 | - | 135 |
| ST474   | STM474_3093    | 379702206 | + | 3116333-3116446 | hypothetical protein             | 3094321-3094434 | + | 114 |
| T000240 | STMDT12_C30010 | 378985541 | + | 3118721-3118852 | hypothetical protein             | 3095475-3095606 | + | 132 |
| T000240 | STMDT12_C30020 | 378985542 | + | 3118836-3119024 | hypothetical protein             | 3095590-3095778 | + | 189 |
| ST474   | STM474_3094    | 379702207 | - | 3117516-3117629 | hypothetical protein             | 3095687-3095800 | - | 114 |
| 140285  | STM14_3560     | 378451709 | + | 3121321-3121458 | hypothetical protein             | 3101511-3101648 | + | 138 |
| 140285  | STM14_3561     | 378451710 | + | 3121826-3121978 | putative fibrillar subunit       | 3102016-3102168 | + | 153 |
| 140285  | STM14_3571     | 378451720 | + | 3134509-3134736 | hypothetical protein             | 3114699-3114926 | + | 228 |
| 140285  | STM14_3579     | 378451727 | + | 3140022-3140165 | hypothetical protein             | 3120212-3120355 | + | 144 |
| 140285  | STM14_3580     | 378451728 | + | 3140255-3140359 | hypothetical protein             | 3120445-3120549 | + | 105 |
| 140285  | STM14_3583     | 378451731 | - | 3143293-3143478 | hypothetical protein             | 3123483-3123668 | - | 186 |
| 140285  | STM14_3585     | 378451733 | - | 3144205-3144342 | L-1,2-propanediol oxidoreductase | 3124395-3124532 | - | 138 |
| 140285  | STM14_3588     | 378451736 | - | 3146280-3146447 | hypothetical protein             | 3126470-3126637 | - | 168 |
| 140285  | STM14_3600     | 378451747 | + | 3157563-3157685 | hypothetical protein             | 3137754-3137876 | + | 123 |
| 140285  | STM14_3616     | 378451761 | + | 3177651-3177833 | hypothetical protein             | 3157842-3158024 | + | 183 |
| 140285  | STM14_3619     | 378451764 | - | 3179499-3179657 | hypothetical protein             | 3159690-3159848 | - | 159 |
| 140285  | STM14_3622     | 378451767 | - | 3182548-3182661 | hypothetical protein             | 3162739-3162852 | - | 114 |
| 140285  | STM14_3623     | 378451768 | + | 3182641-3182757 | hypothetical protein             | 3162832-3162948 | + | 117 |
| 140285  | STM14_3625     | 378451770 | + | 3183029-3183154 | hypothetical protein             | 3163220-3163345 | + | 126 |
| 140285  | STM14_3626     | 378451771 | - | 3183053-3183160 | hypothetical protein             | 3163244-3163351 | - | 108 |
| 140285  | STM14_3628     | 378451773 | + | 3183985-3184095 | hypothetical protein             | 3164176-3164286 | + | 111 |
| 140285  | STM14_3631     | 378451776 | + | 3185172-3185342 | hypothetical protein             | 3165363-3165533 | + | 171 |
| D23580  | STMMW_29721    | 378446366 | - | 3162322-3162468 | hypothetical protein             | 3170312-3170458 | - | 147 |
| 140285  | STM14_3635     | 378451780 | - | 3190309-3190434 | hypothetical protein             | 3170500-3170625 | - | 126 |
| 140285  | STM14_3642     | 378451787 | - | 3197131-3197247 | hypothetical protein             | 3177322-3177438 | - | 117 |
| 140285  | STM14_3645     | 378451790 | - | 3199028-3199198 | hypothetical protein             | 3179219-3179389 | - | 171 |
| 140285  | STM14_3649     | 378451794 | + | 3202193-3202315 | hypothetical protein             | 3182384-3182506 | + | 123 |
| 140285  | STM14_3658     | 378451803 | + | 3210549-3210968 | hypothetical protein             | 3190698-3191117 | + | 420 |
| 140285  | STM14_3662     | 378451807 | - | 3213534-3213719 | hypothetical protein             | 3193683-3193868 | - | 186 |
| 140285  | STM14_3666     | 378451810 | - | 3215425-3215670 | hypothetical protein             | 3196286-3196531 | - | 246 |
| T000240 | STMDT12_C30880 | 378985628 | + | 3219618-3219734 | hypothetical protein             | 3196355-3196471 | + | 117 |
| 140285  | STM14_3670     | 378451813 | + | 3217519-3217686 | hypothetical protein             | 3198380-3198547 | + | 168 |
| 140285  | STM14_3686     | 378451829 | - | 3230904-3231050 | immunoglobulin VH domain protein | 3211765-3211911 | - | 147 |
| 140285  | STM14_3690     | 378451833 | + | 3235813-3235968 | hypothetical protein             | 3216674-3216829 | + | 156 |
| 140285  | STM14_3691     | 378451834 | + | 3236175-3236279 | hypothetical protein             | 3217036-3217140 | + | 105 |
| 140285  | STM14_3693     | 378451836 | + | 3237457-3237624 | hypothetical protein             | 3218318-3218485 | + | 168 |
| 140285  | STM14_3700     | 378451843 | + | 3243685-3243795 | hypothetical protein             | 3224546-3224656 | + | 111 |
| 140285  | STM14_3702     | 378451845 | + | 3244595-3244732 | hypothetical protein             | 3225456-3225593 | + | 138 |
| 140285  | STM14_3704     | 378451847 | + | 3245634-3245885 | hypothetical protein             | 3226495-3226746 | + | 252 |
| 140285  | STM14_3711     | 378451854 | + | 3252233-3252433 | hypothetical protein             | 3233094-3233294 | + | 201 |
| 140285  | STM14_3718     | 378451861 | + | 3257540-3257698 | hypothetical protein             | 3238401-3238559 | + | 159 |
| 140285  | STM14_3722     | 378451865 | + | 3260720-3260824 | hypothetical protein             | 3241581-3241685 | + | 105 |
| T000240 | STMDT12_C31370 | 378985677 | + | 3269942-3270046 | hypothetical protein             | 3246679-3246783 | + | 105 |
| 140285  | STM14_3734     | 378451876 | - | 3271996-3272121 | hypothetical protein             | 3252875-3253000 | - | 126 |
| 140285  | STM14_3751     | 378451893 | - | 3285668-3285820 | hypothetical protein             | 3266546-3266698 | - | 153 |
| 140285  | STM14_3757     | 378451899 | - | 3289138-3289263 | hypothetical protein             | 3270016-3270141 | - | 126 |
| 140285  | STM14_3759     | 378451901 | - | 3290425-3290550 | hypothetical protein             | 3271303-3271428 | - | 126 |
| 140285  | STM14_3762     | 378451903 | - | 3293235-3293459 | hypothetical protein             | 3274982-3275206 | - | 225 |
| 140285  | STM14_3763     | 378451904 | + | 3293413-3293547 | hypothetical protein             | 3275160-3275294 | + | 135 |
| 140285  | STM14_3773     | 378451913 | + | 3301831-3301965 | hypothetical protein             | 3283578-3283712 | + | 135 |
| 140285  | STM14_3774     | 378451914 | + | 3302110-3302214 | hypothetical protein             | 3283857-3283991 | + | 105 |
| 140285  | STM14_3778     | 378451918 | - | 3305157-3305300 | hypothetical protein             | 3286904-3287047 | - | 144 |
| 140285  | STM14_3779     | 378451919 | - | 3305240-3305395 | putative cytoplasmic protein     | 3286987-3287142 | - | 156 |
| 140285  | STM14_3783     | 378451923 | + | 3308724-3308864 | hypothetical protein             | 3290471-3290611 | + | 141 |
| T000240 | STMDT12_C31860 | 378985726 | + | 3314720-3314875 | hypothetical protein             | 3291456-3291611 | + | 156 |
| 140285  | STM14_3786     | 378451926 | + | 3310018-3310173 | hypothetical protein             | 3291765-3291920 | + | 156 |
| 140285  | STM14_3789     | 378451928 | + | 3312290-3312427 | hypothetical protein             | 3294039-3294176 | + | 138 |
| 140285  | STM14_3790     | 378451929 | - | 3312496-3312606 | hypothetical protein             | 3294245-3294355 | - | 111 |
| 140285  | STM14_3792     | 378451931 | + | 3314050-3314181 | hypothetical protein             | 3295799-3295930 | + | 132 |
| 140285  | STM14_3793     | 378451932 | + | 3314188-3314334 | hypothetical protein             | 3295937-3296083 | - | 147 |
| 140285  | STM14_3794     | 378451933 | + | 3314216-3314410 | hypothetical protein             | 3295965-3296159 | + | 195 |
| 140285  | STM14_3798     | 378451937 | + | 3318584-3318703 | hypothetical protein             | 3300333-3300452 | + | 120 |
| 140285  | STM14_3800     | 378451939 | - | 3319990-3320106 | hypothetical protein             | 3301739-3301855 | - | 117 |
| 140285  | STM14_3801     | 378451940 | + | 3320290-3320487 | hypothetical protein             | 3302039-3302236 | + | 198 |
| 140285  | STM14_3803     | 378451942 | - | 3322464-3322571 | hypothetical protein             | 3304213-3304320 | - | 108 |
| ST474   | STM474_3301    | 379702409 | - | 3334473-3334658 | hypothetical protein             | 3313770-3313955 | - | 186 |
| 140285  | STM14_3815     | 378451954 | + | 3332051-3332179 | hypothetical protein             | 3313800-3313928 | + | 129 |
| 140285  | STM14_3830     | 378451969 | + | 3342234-3342434 | hypothetical protein             | 3323983-3324183 | + | 201 |
| 140285  | STM14_3833     | 378451972 | - | 3344492-3344629 | hypothetical protein             | 3326241-3326378 | - | 138 |
| 140285  | STM14_3834     | 378451973 | + | 3344530-3344640 | hypothetical protein             | 3326279-3326389 | + | 111 |
| ST474   | STM474_3318    | 379702426 | - | 3348584-3348700 | hypothetical protein             | 3327880-3327996 | - | 117 |
| 140285  | STM14_3837     | 378451976 | + | 3346625-3346789 | hypothetical protein             | 3328373-3328537 | + | 165 |
| 140285  | STM14_3840     | 378451979 | - | 3349441-3349545 | hypothetical protein             | 3331189-3331293 | - | 105 |
| 140285  | STM14_3851     | 378451990 | + | 3361049-3361165 | hypothetical protein             | 3342797-3342913 | + | 117 |
| ST474   | STM474_3334    | 379702442 | - | 3364546-3364662 | hypothetical protein             | 3343842-3343958 | - | 117 |
| 140285  | STM14_3860     | 378451999 | + | 3368291-3368398 | hypothetical protein             | 3350039-3350146 | + | 108 |

|         |                |           |   |                 |                                 |                 |   |     |
|---------|----------------|-----------|---|-----------------|---------------------------------|-----------------|---|-----|
| T000240 | STMDT12_C32520 | 378985792 | + | 3381047-3381148 | hypothetical protein            | 3357783-3357884 | + | 102 |
| 140285  | STM14_3872     | 378452011 | - | 3377873-3378022 | hypothetical protein            | 3359620-3359769 | - | 150 |
| 140285  | STM14_3875     | 378452014 | + | 3380454-3380651 | hypothetical protein            | 3362201-3362398 | + | 198 |
| 140285  | STM14_3884     | 378452023 | + | 3390891-3391163 | hypothetical protein            | 3372638-3372910 | + | 273 |
| 140285  | STM14_3895     | 378452033 | + | 3402540-3402695 | hypothetical protein            | 3384287-3384442 | + | 156 |
| 140285  | STM14_3901     | 378452039 | - | 3408358-3408459 | hypothetical protein            | 3390105-3390206 | - | 102 |
| 140285  | STM14_3904     | 378452042 | + | 3410298-3410435 | hypothetical protein            | 3392045-3392182 | - | 138 |
| 140285  | STM14_3907     | 378452045 | - | 3412994-3413194 | hypothetical protein            | 3394741-3394941 | - | 201 |
| ST474   | STM474_3403    | 379702507 | + | 3435178-3435297 | hypothetical protein            | 3414473-3414592 | + | 120 |
| 140285  | STM14_3932     | 378452069 | - | 3436508-3436648 | hypothetical protein            | 3418255-3418395 | - | 141 |
| 140285  | STM14_3933     | 378452070 | + | 3436575-3436694 | hypothetical protein            | 3418322-3418441 | + | 120 |
| 140285  | STM14_3934     | 378452071 | + | 3436648-3436776 | hypothetical protein            | 3418395-3418523 | + | 129 |
| 140285  | STM14_3938     | 378452075 | + | 3440518-3440661 | hypothetical protein            | 3422265-3422408 | + | 144 |
| 140285  | STM14_3965     | 378452100 | - | 3464611-3464718 | hypothetical protein            | 3451427-3451534 | - | 108 |
| 140285  | STM14_3985     | 378452118 | - | 3482355-3482456 | hypothetical protein            | 3468460-3468561 | - | 102 |
| 140285  | STM14_3987     | 378452120 | + | 3483983-3484117 | hypothetical protein            | 3470088-3470222 | - | 135 |
| 140285  | STM14_3996     | 378452128 | - | 3490436-3490546 | hypothetical protein            | 3476540-3476650 | - | 111 |
| 140285  | STM14_4018     | 378452150 | - | 3508092-3508241 | hypothetical protein            | 3494196-3494345 | - | 150 |
| 140285  | STM14_4019     | 378452151 | - | 3508281-3508475 | hypothetical protein            | 3494385-3494579 | - | 195 |
| 140285  | STM14_4023     | 378452155 | + | 3515633-3515794 | hypothetical protein            | 3501737-3501898 | + | 162 |
| 140285  | STM14_4034     | 378452166 | + | 3525086-3525205 | hypothetical protein            | 3511190-3511309 | + | 120 |
| 140285  | STM14_4051     | 378452183 | - | 3540466-3540597 | malate dehydrogenase            | 3526567-3526698 | - | 132 |
| 140285  | STM14_4053     | 378452185 | + | 3541795-3541923 | hypothetical protein            | 3527896-3528024 | + | 129 |
| T000240 | STMDT12_C34190 | 378985959 | + | 3551875-3551970 | hypothetical protein            | 3528611-3528706 | + | 96  |
| ST474   | STM474_3527    | 379702628 | - | 3554690-3554815 | hypothetical protein            | 3533270-3533395 | - | 126 |
| 140285  | STM14_4074     | 378452206 | - | 3563669-3563851 | hypothetical protein            | 3549770-3549952 | - | 183 |
| 140285  | STM14_4075     | 378452207 | + | 3563867-3563971 | hypothetical protein            | 3549968-3550072 | + | 105 |
| 140285  | STM14_4081     | 378452213 | - | 3568595-3568738 | hypothetical protein            | 3554696-3554839 | - | 144 |
| 140285  | STM14_4088     | 378452220 | - | 3574592-3574753 | hypothetical protein            | 3560693-3560854 | - | 162 |
| 140285  | STM14_4089     | 378452221 | + | 3574662-3574820 | hypothetical protein            | 3560763-3560921 | + | 159 |
| 140285  | STM14_4093     | 378452225 | + | 3579746-3579922 | hypothetical protein            | 3565847-3566023 | + | 177 |
| 140285  | STM14_4094     | 378452226 | - | 3580182-3580316 | hypothetical protein            | 3566283-3566417 | - | 135 |
| 140285  | STM14_4095     | 378452227 | + | 3580370-3580480 | hypothetical protein            | 3566471-3566581 | + | 111 |
| T000240 | STMDT12_C34520 | 378985992 | - | 3595480-3595632 | hypothetical protein            | 3572216-3572368 | - | 153 |
| 140285  | STM14_4148     | 378452275 | - | 3611988-3612179 | elongation factor Tu            | 3598130-3598321 | - | 192 |
| ST474   | STM474_3611    | 379702705 | + | 3620933-3621070 | hypothetical protein            | 3599451-3599588 | + | 138 |
| 140285  | STM14_4163     | 378452290 | + | 3623551-3623655 | hypothetical protein            | 3609693-3609797 | + | 105 |
| SL1344  | SL1344_3427    | 378701354 | + | 3633385-3633606 | hypothetical protein            | 3611903-3612124 | + | 222 |
| 140285  | STM14_4167     | 378452293 | + | 3626355-3626480 | hypothetical protein            | 3612497-3612622 | + | 126 |
| 140285  | STM14_4172     | 378452298 | + | 3629162-3629344 | hypothetical protein            | 3615303-3615485 | + | 183 |
| 140285  | STM14_4180     | 378452306 | + | 3635785-3635937 | hypothetical protein            | 3621926-3622078 | + | 153 |
| 140285  | STM14_4182     | 378452308 | - | 3637245-3637421 | hypothetical protein            | 3623386-3623562 | - | 177 |
| 140285  | STM14_4185     | 378452311 | - | 3640241-3640396 | hypothetical protein            | 3626382-3626537 | - | 156 |
| 140285  | STM14_4192     | 378452318 | - | 3649991-3650131 | hypothetical protein            | 3636096-3636236 | - | 141 |
| 140285  | STM14_4207     | 378452333 | - | 3663870-3663983 | hypothetical protein            | 3649975-3650088 | - | 114 |
| 140285  | STM14_4213     | 378452339 | - | 3670273-3670407 | hypothetical protein            | 3656378-3656512 | - | 135 |
| 140285  | STM14_4214     | 378452340 | + | 3670342-3670449 | hypothetical protein            | 3656447-3656554 | + | 108 |
| 140285  | STM14_4220     | 378452346 | + | 3677538-3677768 | hypothetical protein            | 3663640-3663870 | + | 231 |
| 140285  | STM14_4224     | 378452350 | + | 3680653-3680766 | hypothetical protein            | 3666755-3666868 | + | 114 |
| 140285  | STM14_4229     | 378452355 | - | 3684140-3684289 | hypothetical protein            | 3670242-3670391 | - | 150 |
| 140285  | STM14_4233     | 378452359 | - | 3690393-3690500 | hypothetical protein            | 3676495-3676602 | - | 108 |
| 140285  | STM14_4240     | 378452366 | - | 3698369-3698491 | hypothetical protein            | 3684671-3684793 | - | 123 |
| 140285  | STM14_4243     | 378452369 | - | 3700901-3701017 | hypothetical protein            | 3687203-3687319 | - | 117 |
| 140285  | STM14_4259     | 378452384 | - | 3722125-3722298 | hypothetical protein            | 3708426-3708599 | - | 174 |
| 140285  | STM14_4261     | 378452386 | + | 3723463-3723627 | hypothetical protein            | 3709764-3709928 | + | 165 |
| 140285  | STM14_4263     | 378452387 | + | 3723698-3723940 | putative inner membrane protein | 3709999-3710241 | + | 243 |
| 140285  | STM14_4269     | 378452393 | + | 3728906-3729031 | hypothetical protein            | 3715207-3715332 | + | 126 |
| 140285  | STM14_4270     | 378452394 | + | 3729191-3729319 | hypothetical protein            | 3715492-3715620 | + | 129 |
| ST474   | STM474_3713    | 379702806 | - | 3737509-3737628 | hypothetical protein            | 3716186-3716305 | - | 120 |
| 140285  | STM14_4277     | 378452401 | + | 3735927-3736031 | hypothetical protein            | 3722229-3722333 | + | 105 |
| 140285  | STM14_4291     | 378452415 | - | 3747318-3747434 | hypothetical protein            | 3733620-3733736 | - | 117 |
| 140285  | STM14_4296     | 378452420 | + | 3750462-3750605 | hypothetical protein            | 3736764-3736907 | + | 144 |
| 140285  | STM14_4316     | 378452440 | + | 3770553-3770684 | hypothetical protein            | 3756855-3756986 | + | 132 |
| 140285  | STM14_4325     | 378452449 | + | 3781138-3781305 | hypothetical protein            | 3767437-3767604 | + | 168 |
| 140285  | STM14_4333     | 378452457 | + | 3789092-3789217 | hypothetical protein            | 3775391-3775516 | + | 126 |
| 140285  | STM14_4336     | 378452460 | - | 3792675-3792815 | hypothetical protein            | 3778974-3779114 | - | 141 |
| 140285  | STM14_4339     | 378452463 | - | 3794036-3794179 | hypothetical protein            | 3780335-3780478 | - | 144 |
| 140285  | STM14_4340     | 378452464 | + | 3794140-3794265 | hypothetical protein            | 3780439-3780564 | + | 126 |
| 140285  | STM14_4343     | 378452467 | + | 3796527-3796667 | hypothetical protein            | 3782826-3782966 | + | 141 |
| 140285  | STM14_4347     | 378452471 | - | 3801111-3801227 | hypothetical protein            | 3787410-3787526 | - | 117 |
| 140285  | STM14_4350     | 378452474 | + | 3803739-3803876 | hypothetical protein            | 3790038-3790175 | + | 138 |
| 140285  | STM14_4352     | 378452476 | - | 3805315-3805461 | hypothetical protein            | 3791614-3791760 | - | 147 |
| 140285  | STM14_4354     | 378452478 | - | 3807400-3807591 | hypothetical protein            | 3793699-3793890 | - | 192 |
| 140285  | STM14_4361     | 378452485 | + | 3818231-3818344 | hypothetical protein            | 3804530-3804643 | + | 114 |
| 140285  | STM14_4366     | 378452489 | - | 3822083-3822277 | hypothetical protein            | 3808382-3808576 | - | 195 |
| 140285  | STM14_4374     | 378452497 | - | 3827982-3828101 | hypothetical protein            | 3814281-3814400 | - | 120 |
| 140285  | STM14_4378     | 378452501 | - | 3832781-3832954 | hypothetical protein            | 3819080-3819253 | - | 174 |
| 140285  | STM14_4379     | 378452502 | + | 3832815-3832976 | hypothetical protein            | 3819114-3819275 | + | 162 |
| 140285  | STM14_4388     | 378452509 | + | 3842019-3842180 | hypothetical protein            | 3828328-3828489 | + | 162 |
| 140285  | STM14_4393     | 378452514 | + | 3846344-3846445 | hypothetical protein            | 3832653-3832754 | + | 102 |
| 140285  | STM14_4395     | 378452516 | - | 3847245-3847379 | hypothetical protein            | 3833554-3833688 | - | 135 |
| 140285  | STM14_4403     | 378452524 | - | 3852193-3852324 | hypothetical protein            | 3838502-3838633 | - | 132 |
| 140285  | STM14_4408     | 378452528 | + | 3856473-3856610 | hypothetical protein            | 3842782-3842919 | + | 138 |
| 140285  | STM14_4410     | 378452530 | - | 3856798-3857019 | hypothetical protein            | 3843107-3843328 | - | 222 |
| 140285  | STM14_4415     | 378452535 | + | 3861460-3861693 | hypothetical protein            | 3847769-3848002 | + | 234 |
| 140285  | STM14_4416     | 378452536 | - | 3861562-3861738 | hypothetical protein            | 3847871-3848047 | - | 177 |
| 140285  | STM14_4419     | 378452539 | + | 3863890-3864222 | hypothetical protein            | 3850199-3850531 | + | 333 |
| 140285  | STM14_4424     | 378452544 | - | 3869165-3869311 | hypothetical protein            | 3855474-3855620 | - | 147 |
| 140285  | STM14_4437     | 378452557 | + | 3881551-3881694 | hypothetical protein            | 3867860-3868003 | + | 144 |
| 140285  | STM14_4448     | 378452568 | + | 3893735-3893932 | hypothetical protein            | 3880044-3880241 | + | 198 |
| ST474   | STM474_3868    | 379702957 | - | 3911348-3911467 | hypothetical protein            | 3890032-3890151 | - | 120 |
| 140285  | STM14_4456     | 378452576 | + | 3904878-3905129 | hypothetical protein            | 3891186-3891437 | + | 252 |
| 140285  | STM14_4485     | 378452605 | - | 3932731-3932850 | hypothetical protein            | 3919039-3919158 | - | 120 |



|         |                |           |   |                 |                              |                 |   |     |
|---------|----------------|-----------|---|-----------------|------------------------------|-----------------|---|-----|
| 14028S  | STM14_4497     | 378452617 | + | 3941019-3941198 | hypothetical protein         | 3927327-3927506 | + | 180 |
| 14028S  | STM14_4501     | 378452621 | + | 3943928-3944110 | hypothetical protein         | 3930236-3930418 | + | 183 |
| 14028S  | STM14_4504     | 378452624 | + | 3946552-3946725 | hypothetical protein         | 3932860-3933033 | + | 174 |
| 14028S  | STM14_4512     | 378452632 | - | 3954806-3954916 | hypothetical protein         | 3941114-3941224 | - | 111 |
| 14028S  | STM14_4518     | 378452637 | + | 3962472-3962597 | hypothetical protein         | 3948780-3948905 | + | 126 |
| 14028S  | STM14_4520     | 378452639 | + | 3963213-3963356 | hypothetical protein         | 3949521-3949664 | + | 144 |
| 14028S  | STM14_4521     | 378452640 | - | 3963387-3963497 | hypothetical protein         | 3949695-3949805 | - | 111 |
| 14028S  | STM14_4531     | 378452648 | + | 3973351-3973476 | hypothetical protein         | 3959659-3959784 | + | 126 |
| 14028S  | STM14_4533     | 378452650 | - | 3974252-3974359 | hypothetical protein         | 3960560-3960667 | - | 108 |
| 14028S  | STM14_4535     | 378452652 | + | 3974935-3975075 | hypothetical protein         | 3961243-3961383 | + | 141 |
| T000240 | STMDT12_C38190 | 378986359 | - | 3984324-3984416 | hypothetical protein         | 3961428-3961520 | - | 93  |
| 14028S  | STM14_4537     | 378452654 | + | 3978059-3978172 | hypothetical protein         | 3964367-3964480 | + | 114 |
| 14028S  | STM14_4539     | 378452656 | + | 3979055-3979171 | hypothetical protein         | 3965363-3965479 | + | 117 |
| 14028S  | STM14_4540     | 378452657 | - | 3979172-3979297 | hypothetical protein         | 3965480-3965605 | - | 126 |
| 14028S  | STM14_4549     | 378452666 | + | 3986024-3986146 | hypothetical protein         | 3972332-3972454 | + | 123 |
| 14028S  | STM14_4551     | 378452668 | + | 3989051-3989164 | hypothetical protein         | 3975359-3975472 | - | 114 |
| 14028S  | STM14_4553     | 378452670 | + | 3989514-3989657 | hypothetical protein         | 3975822-3975965 | + | 144 |
| 14028S  | STM14_4565     | 378452682 | - | 3999123-3999230 | hypothetical protein         | 3985431-3985538 | - | 108 |
| 14028S  | STM14_4567     | 378452684 | - | 3999764-3999871 | hypothetical protein         | 3986072-3986179 | - | 108 |
| 14028S  | STM14_4578     | 378452695 | + | 4011296-4011472 | hypothetical protein         | 3997604-3997780 | + | 177 |
| 14028S  | STM14_4580     | 378452697 | + | 4011519-4011680 | hypothetical protein         | 3997827-3997988 | + | 162 |
| 14028S  | STM14_4581     | 378452698 | - | 4011613-4011768 | hypothetical protein         | 3997921-3998076 | - | 156 |
| 14028S  | STM14_4582     | 378452699 | + | 4011777-4011950 | hypothetical protein         | 3998085-3998258 | + | 174 |
| 14028S  | STM14_4589     | 378452704 | - | 4016572-4016697 | hypothetical protein         | 4002880-4003005 | - | 126 |
| 14028S  | STM14_4595     | 378452710 | + | 4020774-4020887 | hypothetical protein         | 4007082-4007195 | + | 114 |
| ST474   | STM474_3981    | 379703066 | - | 4028417-4028551 | hypothetical protein         | 4007103-4007237 | - | 135 |
| 14028S  | STM14_4598     | 378452712 | + | 4022921-4023073 | hypothetical protein         | 4009229-4009381 | + | 153 |
| 14028S  | STM14_4601     | 378452715 | + | 4024130-4024306 | hypothetical protein         | 4010438-4010614 | + | 177 |
| ST474   | STM474_3986    | 379703070 | - | 4031907-4032026 | hypothetical protein         | 4010593-4010712 | - | 120 |
| 14028S  | STM14_4630     | 378452743 | + | 4056093-4056239 | hypothetical protein         | 4042400-4042546 | + | 147 |
| 14028S  | STM14_4633     | 378452746 | + | 4059079-4059237 | hypothetical protein         | 4045386-4045544 | + | 159 |
| ST474   | STM474_4022    | 379703106 | - | 4071364-4071624 | hypothetical protein         | 4050049-4050309 | - | 261 |
| T000240 | STMDT12_C40060 | 378986546 | - | 4156200-4156427 | hypothetical protein         | 4051088-4051315 | - | 228 |
| 14028S  | STM14_4658     | 378452770 | + | 4086316-4086504 | hypothetical protein         | 4072623-4072811 | + | 189 |
| 14028S  | STM14_4669     | 378452781 | - | 4094364-4094507 | hypothetical protein         | 4080671-4080814 | - | 144 |
| 14028S  | STM14_4696     | 378452801 | + | 4122161-4122346 | hypothetical protein         | 4108470-4108655 | + | 186 |
| 14028S  | STM14_4733     | 378452833 | + | 4155257-4155382 | hypothetical protein         | 4141566-4141691 | + | 126 |
| 14028S  | STM14_4738     | 378452838 | - | 4159908-4160012 | hypothetical protein         | 4146217-4146321 | - | 105 |
| 14028S  | STM14_4740     | 378452840 | + | 4162570-4162710 | hypothetical protein         | 4148879-4149019 | + | 141 |
| 14028S  | STM14_4753     | 378452852 | - | 4171444-4171629 | hypothetical protein         | 4157753-4157938 | - | 186 |
| 14028S  | STM14_4759     | 378452858 | - | 4175211-4175348 | hypothetical protein         | 4161520-4161657 | - | 138 |
| 14028S  | STM14_4768     | 378452867 | + | 4183187-4183360 | hypothetical protein         | 4169496-4169669 | + | 174 |
| ST474   | STM474_4144    | 379703214 | + | 4193636-4193764 | hypothetical protein         | 4172090-4172218 | + | 129 |
| 14028S  | STM14_4770     | 378452869 | - | 4185870-4186004 | hypothetical protein         | 4172179-4172313 | - | 135 |
| 14028S  | STM14_4771     | 378452870 | + | 4185906-4186052 | hypothetical protein         | 4172215-4172361 | + | 147 |
| 14028S  | STM14_4784     | 378452883 | + | 4197098-4197223 | hypothetical protein         | 4183407-4183532 | + | 126 |
| 14028S  | STM14_4800     | 378452894 | - | 4215049-4215231 | hypothetical protein         | 4201465-4201647 | - | 183 |
| 14028S  | STM14_4801     | 378452895 | + | 4215077-4215433 | hypothetical protein         | 4201493-4201849 | + | 357 |
| 14028S  | STM14_4808     | 378452902 | - | 4219525-4219656 | hypothetical protein         | 4205941-4206072 | - | 132 |
| 14028S  | STM14_4811     | 378452904 | + | 4222708-4222851 | hypothetical protein         | 4209124-4209267 | + | 144 |
| 14028S  | STM14_4816     | 378452909 | - | 4226121-4226246 | hypothetical protein         | 4212537-4212662 | - | 126 |
| 14028S  | STM14_4819     | 378452912 | - | 4228860-4229039 | hypothetical protein         | 4215276-4215455 | - | 180 |
| 14028S  | STM14_4821     | 378452914 | - | 4230571-4230990 | putative cytoplasmic protein | 4216987-4217406 | - | 420 |
| 14028S  | STM14_4837     | 378452930 | - | 4248232-4248351 | hypothetical protein         | 4234648-4234767 | - | 120 |
| ST474   | STM474_4210    | 379703274 | - | 4263051-4263284 | hypothetical protein         | 4241612-4241845 | - | 234 |
| 14028S  | STM14_4854     | 378452947 | - | 4262409-4262564 | hypothetical protein         | 4248825-4248980 | - | 156 |
| 14028S  | STM14_4856     | 378452949 | + | 4263770-4263904 | hypothetical protein         | 4250186-4250320 | + | 135 |
| 14028S  | STM14_4858     | 378452951 | + | 4265002-4265130 | hypothetical protein         | 4251418-4251546 | + | 129 |
| 14028S  | STM14_4867     | 378452960 | + | 4272347-4272496 | hypothetical protein         | 4258763-4258912 | + | 150 |
| 14028S  | STM14_4868     | 378452961 | - | 4272426-4272560 | hypothetical protein         | 4258842-4258976 | - | 135 |
| 14028S  | STM14_4872     | 378452965 | + | 4275521-4275652 | hypothetical protein         | 4261937-4262068 | + | 132 |
| ST474   | STM474_4231    | 379703295 | + | 4283542-4283655 | hypothetical protein         | 4262103-4262216 | + | 114 |
| 14028S  | STM14_4873     | 378452966 | + | 4275986-4276111 | hypothetical protein         | 4262402-4262527 | + | 126 |
| 14028S  | STM14_4886     | 378452979 | - | 4286951-4287055 | hypothetical protein         | 4273367-4273471 | - | 105 |
| 14028S  | STM14_4898     | 378452991 | - | 4296957-4297091 | hypothetical protein         | 4283372-4283506 | - | 135 |
| 14028S  | STM14_4909     | 378453002 | - | 4305795-4305962 | hypothetical protein         | 4292210-4292377 | - | 168 |
| 14028S  | STM14_4914     | 378453007 | + | 4310547-4310666 | hypothetical protein         | 4296962-4297081 | + | 120 |
| 14028S  | STM14_4916     | 378453009 | - | 4311024-4311164 | hypothetical protein         | 4297439-4297579 | - | 141 |
| ST474   | STM474_4282    | 379703346 | + | 4329998-4330159 | hypothetical protein         | 4308559-4308720 | + | 162 |
| 14028S  | STM14_4934     | 378453027 | - | 4332008-4332127 | hypothetical protein         | 4318423-4318542 | - | 120 |
| 14028S  | STM14_4938     | 378453031 | + | 4336017-4336178 | hypothetical protein         | 4322432-4322593 | + | 162 |
| 14028S  | STM14_4943     | 378453035 | - | 4340772-4340927 | hypothetical protein         | 4327187-4327342 | - | 156 |
| 14028S  | STM14_4950     | 378453042 | + | 4346732-4346872 | hypothetical protein         | 4333147-4333287 | + | 141 |
| 14028S  | STM14_4951     | 378453043 | + | 4346784-4346900 | hypothetical protein         | 4333199-4333315 | + | 117 |
| 14028S  | STM14_4953     | 378453045 | + | 4348703-4348810 | hypothetical protein         | 4335118-4335225 | + | 108 |
| 14028S  | STM14_4961     | 378453053 | - | 4358974-4359162 | hypothetical protein         | 4345389-4345577 | - | 189 |
| 14028S  | STM14_0296     | 378448563 | + | 291760-291876   | hypothetical protein         | 4353013-4353129 | + | 117 |
| 14028S  | STM14_4983     | 378453065 | + | 4375382-4375510 | hypothetical protein         | 4361801-4361929 | + | 129 |
| 14028S  | STM14_4994     | 378453076 | - | 4388486-4388623 | hypothetical protein         | 4374905-4375042 | - | 138 |
| 14028S  | STM14_4995     | 378453077 | + | 4388644-4388847 | hypothetical protein         | 4375063-4375266 | + | 204 |
| 14028S  | STM14_4997     | 378453079 | + | 4389931-4390140 | hypothetical protein         | 4376350-4376559 | + | 210 |
| 14028S  | STM14_5018     | 378453099 | + | 4407683-4407805 | hypothetical protein         | 4394102-4394224 | + | 123 |
| 14028S  | STM14_5019     | 378453100 | - | 4407796-4407918 | hypothetical protein         | 4394215-4394337 | - | 123 |
| 14028S  | STM14_5020     | 378453101 | + | 4407851-4407991 | hypothetical protein         | 4394270-4394410 | + | 141 |
| 14028S  | STM14_0291     | 378448561 | - | 289581-289703   | hypothetical protein         | 4394377-4394499 | - | 123 |
| 14028S  | STM14_5025     | 378453102 | - | 4413499-4413630 | hypothetical protein         | 4399960-4400091 | - | 132 |
| 14028S  | STM14_5026     | 378453103 | + | 4413565-4413795 | hypothetical protein         | 4400026-4400256 | + | 231 |
| 14028S  | STM14_5031     | 378453108 | + | 4418519-4418641 | hypothetical protein         | 4404980-4405102 | + | 123 |
| 14028S  | STM14_5044     | 378453120 | + | 4431313-4431468 | hypothetical protein         | 4417774-4417929 | + | 156 |
| 14028S  | STM14_5053     | 378453129 | + | 4437882-4438004 | hypothetical protein         | 4424343-4424465 | + | 123 |
| 14028S  | STM14_5057     | 378453133 | - | 4441014-4441139 | hypothetical protein         | 4427475-4427600 | - | 126 |
| 14028S  | STM14_5072     | 378453147 | + | 4451435-4451575 | hypothetical protein         | 4437894-4438034 | + | 141 |
| 14028S  | STM14_5083     | 378453158 | - | 4462681-4462857 | hypothetical protein         | 4449140-4449316 | - | 177 |

|         |                |           |   |                 |                                                              |                 |   |     |
|---------|----------------|-----------|---|-----------------|--------------------------------------------------------------|-----------------|---|-----|
| 14028S  | STM14_5084     | 378453159 | + | 4462737-4462877 | hypothetical protein                                         | 4449196-4449336 | + | 141 |
| 14028S  | STM14_5088     | 378453163 | + | 4466972-4467136 | hypothetical protein                                         | 4453431-4453595 | + | 165 |
| T000240 | STMDT12_C43680 | 378986908 | + | 4559620-4559715 | hypothetical protein                                         | 4454532-4454627 | + | 96  |
| 14028S  | STM14_5101     | 378453176 | + | 4478537-4478704 | hypothetical protein                                         | 4464995-4465162 | + | 168 |
| 14028S  | STM14_5115     | 378453190 | - | 4490374-4490565 | hypothetical protein                                         | 4476832-4477023 | - | 192 |
| 14028S  | STM14_5116     | 378453191 | + | 4490568-4490723 | hypothetical protein                                         | 4477026-4477181 | - | 156 |
| ST474   | STM474_4451    | 379703497 | + | 4498500-4498640 | hypothetical protein                                         | 4477207-4477347 | + | 141 |
| 14028S  | STM14_5124     | 378453199 | + | 4515420-4515557 | hypothetical protein                                         | 4501878-4502015 | - | 138 |
| 14028S  | STM14_5125     | 378453200 | - | 4515741-4515845 | hypothetical protein                                         | 4502199-4502303 | - | 105 |
| 14028S  | STM14_5129     | 378453204 | - | 4518503-4518631 | hypothetical protein                                         | 4504961-4505089 | - | 129 |
| 14028S  | STM14_5131     | 378453206 | - | 4519322-4519456 | hypothetical protein                                         | 4505780-4505914 | - | 135 |
| 14028S  | STM14_5132     | 378453207 | - | 4519489-4519611 | hypothetical protein                                         | 4505947-4506069 | - | 123 |
| 14028S  | STM14_5134     | 378453209 | - | 4521030-4521188 | hypothetical protein                                         | 4507488-4507646 | - | 159 |
| 14028S  | STM14_5149     | 378453224 | - | 4536353-4536481 | hypothetical protein                                         | 4522811-4522939 | - | 129 |
| 14028S  | STM14_5150     | 378453225 | + | 4536377-4536649 | hypothetical protein                                         | 4522835-4523107 | + | 273 |
| 14028S  | STM14_5152     | 378453227 | + | 4537849-4538022 | hypothetical protein                                         | 4524307-4524480 | + | 174 |
| 14028S  | STM14_5154     | 378453229 | - | 4538728-4538883 | hypothetical protein                                         | 4525186-4525341 | - | 156 |
| 14028S  | STM14_5160     | 378453235 | + | 4544189-4544284 | hypothetical protein                                         | 4530647-4530742 | + | 96  |
| 14028S  | STM14_5162     | 378453237 | + | 4546069-4546173 | hypothetical protein                                         | 4532527-4532631 | + | 105 |
| 14028S  | STM14_5168     | 378453243 | + | 4552110-4552238 | hypothetical protein                                         | 4538568-4538696 | + | 129 |
| 14028S  | STM14_5183     | 378453258 | + | 4571436-4571549 | hypothetical protein                                         | 4557894-4558007 | + | 114 |
| 14028S  | STM14_5189     | 378453264 | + | 4574725-4574850 | hypothetical protein                                         | 4561895-4562020 | + | 126 |
| SL1344  | SL1344_4256    | 378702162 | - | 4584964-4585098 | hypothetical protein                                         | 4564384-4564518 | - | 135 |
| ST474   | STM474_4515    | 379703561 | - | 4585588-4585743 | hypothetical protein                                         | 4565007-4565162 | - | 156 |
| ST474   | STM474_4516    | 379703562 | - | 4586025-4586150 | hypothetical protein                                         | 4565443-4565568 | - | 126 |
| 14028S  | STM14_5196     | 378453271 | - | 4579152-4579388 | hypothetical protein                                         | 4566321-4566557 | - | 237 |
| 14028S  | STM14_5203     | 378453277 | - | 4585245-4585367 | hypothetical protein                                         | 4572414-4572536 | - | 123 |
| 14028S  | STM14_5208     | 378453282 | - | 4589666-4589833 | hypothetical protein                                         | 4576835-4577002 | - | 168 |
| 14028S  | STM14_5211     | 378453285 | + | 4591089-4591223 | hypothetical protein                                         | 4578258-4578399 | + | 135 |
| 14028S  | STM14_5212     | 378453286 | - | 4591232-4591378 | hypothetical protein                                         | 4578401-4578547 | - | 147 |
| 14028S  | STM14_5225     | 378453299 | + | 4599983-4600087 | hypothetical protein                                         | 4587152-4587256 | + | 105 |
| 14028S  | STM14_5272     | 378453343 | - | 4642797-4642994 | hypothetical protein                                         | 4629967-4630164 | - | 198 |
| 14028S  | STM14_5273     | 378453344 | + | 4642921-4643028 | hypothetical protein                                         | 4630091-4630198 | + | 108 |
| 14028S  | STM14_5288     | 378453359 | - | 4654346-4654567 | hypothetical protein                                         | 4641516-4641737 | - | 222 |
| 14028S  | STM14_5291     | 378453362 | - | 4655902-4656081 | hypothetical protein                                         | 4643072-4643251 | - | 180 |
| 14028S  | STM14_5295     | 378453366 | + | 4658725-4658841 | hypothetical protein                                         | 4645895-4646011 | + | 117 |
| 14028S  | STM14_5303     | 378453374 | - | 4669323-4669508 | hypothetical protein                                         | 4656493-4656678 | - | 186 |
| 14028S  | STM14_5305     | 378453376 | - | 4670877-4671137 | hypothetical protein                                         | 4658047-4658307 | - | 261 |
| 14028S  | STM14_5306     | 378453377 | + | 4671075-4671302 | hypothetical protein                                         | 4658245-4658472 | + | 228 |
| 14028S  | STM14_5309     | 378453380 | - | 4673931-4674110 | hypothetical protein                                         | 4661101-4661280 | - | 180 |
| ST474   | STM474_4616    | 379703657 | + | 4681690-4681806 | hypothetical protein                                         | 4661108-4661224 | + | 117 |
| 14028S  | STM14_5313     | 378453384 | - | 4678291-4678593 | putative cytoplasmic protein                                 | 4665461-4665763 | - | 303 |
| 14028S  | STM14_5315     | 378453386 | + | 4679544-4679654 | hypothetical protein                                         | 4666714-4666824 | + | 111 |
| ST474   | STM474_4627    | 379703668 | - | 4695124-4695237 | hypothetical protein                                         | 4674542-4674655 | - | 114 |
| 14028S  | STM14_5323     | 378453393 | + | 4689572-4689691 | hypothetical protein                                         | 4676740-4676859 | + | 120 |
| 14028S  | STM14_5347     | 378453416 | + | 4711078-4711185 | hypothetical protein                                         | 4698245-4698352 | + | 108 |
| ST474   | STM474_4653    | 379703693 | + | 4719860-4719991 | hypothetical protein                                         | 4699276-4699407 | + | 132 |
| UK1     | STMUK_4448     | 378991724 | + | 4665460-4665600 | putative cytoplasmic protein                                 | 4705022-4705162 | + | 141 |
| 14028S  | STM14_5356     | 378453425 | - | 4718450-4718566 | hypothetical protein                                         | 4705617-4705733 | - | 117 |
| T000240 | STMDT12_C45910 | 378987131 | + | 4803005-4803103 | hypothetical protein                                         | 4705623-4705721 | + | 99  |
| 14028S  | STM14_5359     | 378453428 | - | 4721103-4721225 | hypothetical protein                                         | 4708270-4708392 | - | 123 |
| 14028S  | STM14_5362     | 378453431 | + | 4723479-4723670 | hypothetical protein                                         | 4710646-4710837 | + | 192 |
| 14028S  | STM14_5367     | 378453436 | - | 4727023-4727145 | hypothetical protein                                         | 4714190-4714312 | - | 123 |
| T000240 | STMDT12_C46080 | 378987148 | + | 4822036-4822131 | hypothetical protein                                         | 4724654-4724749 | + | 96  |
| 14028S  | STM14_5381     | 378453450 | + | 4741810-4741944 | hypothetical protein                                         | 4728977-4729111 | + | 135 |
| 14028S  | STM14_5396     | 378453464 | - | 4764865-4765110 | molybdopterin-guanine dinucleotide biosynthesis protein MobA | 4752032-4752277 | - | 246 |
| 14028S  | STM14_5399     | 378453466 | + | 4766523-4766714 | hypothetical protein                                         | 4753690-4753881 | + | 192 |
| 14028S  | STM14_5402     | 378453469 | - | 4768806-4769102 | hypothetical protein                                         | 4755973-4756269 | - | 297 |
| 14028S  | STM14_5406     | 378453473 | + | 4772201-4772314 | hypothetical protein                                         | 4759368-4759481 | + | 114 |
| 14028S  | STM14_5407     | 378453474 | - | 4772241-4772357 | hypothetical protein                                         | 4759408-4759524 | - | 117 |
| 14028S  | STM14_5410     | 378453477 | + | 4773638-4773850 | hypothetical protein                                         | 4760805-4761017 | + | 213 |
| 14028S  | STM14_5415     | 378453482 | + | 4776954-4777076 | hypothetical protein                                         | 4764121-4764243 | + | 123 |
| 14028S  | STM14_5416     | 378453483 | - | 4776976-4777107 | hypothetical protein                                         | 4764143-4764274 | - | 132 |
| 14028S  | STM14_5426     | 378453493 | - | 4786173-4786316 | hypothetical protein                                         | 4773340-4773483 | - | 144 |
| 14028S  | STM14_5427     | 378453494 | + | 4786386-4786523 | hypothetical protein                                         | 4773553-4773690 | + | 138 |
| 14028S  | STM14_5429     | 378453496 | - | 4787107-4787220 | hypothetical protein                                         | 4774274-4774387 | - | 114 |
| ST474   | STM474_4722    | 379703761 | - | 4794952-4795101 | hypothetical protein                                         | 4774368-4774517 | - | 150 |
| 14028S  | STM14_5435     | 378453502 | - | 4790281-4790412 | hypothetical protein                                         | 4777448-4777579 | - | 132 |
| 14028S  | STM14_5440     | 378453507 | + | 4798305-4798442 | hypothetical protein                                         | 4785472-4785609 | + | 138 |
| 14028S  | STM14_5447     | 378453514 | - | 4804689-4804838 | hypothetical protein                                         | 4791856-4792005 | - | 150 |
| 14028S  | STM14_5455     | 378453522 | + | 4812431-4812535 | hypothetical protein                                         | 4799598-4799702 | + | 105 |
| 14028S  | STM14_5462     | 378453529 | - | 4818419-4818574 | hypothetical protein                                         | 4805586-4805741 | - | 156 |
| 14028S  | STM14_5468     | 378453535 | + | 4823006-4823134 | hypothetical protein                                         | 4810173-4810301 | + | 129 |
| 14028S  | STM14_5474     | 378453538 | + | 4824998-4825105 | hypothetical protein                                         | 4812165-4812272 | + | 108 |
| 14028S  | STM14_5479     | 378453543 | + | 4828502-4828636 | hypothetical protein                                         | 4815669-4815803 | + | 135 |
| 14028S  | STM14_5486     | 378453550 | + | 4833992-4834120 | hypothetical protein                                         | 4821159-4821287 | + | 129 |
| 14028S  | STM14_5496     | 378453560 | + | 4843995-4844144 | hypothetical protein                                         | 4831162-4831311 | + | 150 |
| ST474   | smf            | 379703819 | + | 4853656-4853805 | phosphoserine phosphatase                                    | 4833075-4833224 | + | 150 |

| Genome name | Gene Name   | GI        | Strand | Reference details |            | Product                                  | Gene annotated in T000240 |             |     |
|-------------|-------------|-----------|--------|-------------------|------------|------------------------------------------|---------------------------|-------------|-----|
|             |             |           |        | CDS-region        | Coordinate |                                          | Strand                    | Length (bp) |     |
| 14028S      | thrL        | 378448275 | +      | 190-255           |            | thr operon leader peptide                | 190-255                   | +           | 66  |
| 14028S      | STM14_0012  | 378448286 | +      | 11257-11424       |            | hypothetical protein                     | 11257-11424               | +           | 168 |
| 14028S      | STM14_0015  | 378448289 | +      | 14845-14958       |            | hypothetical protein                     | 14845-14958               | +           | 114 |
| 14028S      | STM14_0020  | 378448294 | -      | 17613-17741       |            | hypothetical protein                     | 17613-17741               | -           | 129 |
| 14028S      | STM14_0021  | 378448295 | +      | 17665-17787       |            | hypothetical protein                     | 17665-17787               | +           | 123 |
| 14028S      | STM14_0024  | 378448298 | +      | 23091-23240       |            | hypothetical protein                     | 23091-23240               | +           | 150 |
| 14028S      | STM14_0026  | 378448300 | -      | 24094-24198       |            | hypothetical protein                     | 24094-24198               | -           | 105 |
| 14028S      | STM14_0027  | 378448301 | +      | 24316-24426       |            | hypothetical protein                     | 24316-24426               | +           | 111 |
| 14028S      | STM14_0040  | 378448314 | +      | 34828-34974       |            | hypothetical protein                     | 34828-34974               | +           | 147 |
| 14028S      | STM14_0057  | 378448331 | +      | 57203-57334       |            | hypothetical protein                     | 57203-57334               | +           | 132 |
| 14028S      | STM14_0068  | 378448342 | -      | 68513-68671       |            | hypothetical protein                     | 68513-68671               | -           | 159 |
| ST474       | STM474_0083 | 379699298 | -      | 92031-92228       |            | hypothetical protein                     | 92028-92225               | -           | 198 |
| 14028S      | STM14_0097  | 378448371 | -      | 95263-95379       |            | hypothetical protein                     | 94551-94667               | -           | 117 |
| 14028S      | STM14_0102  | 378448376 | +      | 98738-99019       |            | hypothetical protein                     | 98026-98307               | +           | 282 |
| 14028S      | STM14_0105  | 378448379 | -      | 101349-101474     |            | hypothetical protein                     | 100637-100762             | -           | 126 |
| 14028S      | STM14_0113  | 378448387 | -      | 108892-109053     |            | hypothetical protein                     | 108180-108341             | -           | 162 |
| 14028S      | STM14_0128  | 378448402 | -      | 127427-127546     |            | putative lipoprotein                     | 126715-126834             | -           | 120 |
| 14028S      | STM14_0130  | 378448404 | -      | 129166-129492     |            | hypothetical protein                     | 128454-128780             | -           | 327 |
| ST474       | STM474_0115 | 379699330 | +      | 128926-129039     |            | hypothetical protein                     | 128923-129036             | +           | 114 |
| 14028S      | leuL        | 378448409 | -      | 134538-134624     |            | leu operon leader peptide                | 133826-133912             | -           | 87  |
| 14028S      | STM14_0136  | 378448410 | -      | 134689-134793     |            | hypothetical protein                     | 133977-134081             | -           | 105 |
| 14028S      | STM14_0137  | 378448411 | +      | 135067-135210     |            | hypothetical protein                     | 134355-134498             | +           | 144 |
| 14028S      | STM14_0141  | 378448415 | -      | 138755-138877     |            | hypothetical protein                     | 138043-138165             | -           | 123 |
| LT2         | STM04630    | 409994397 | -      | 139338-139487     |            | hypothetical protein                     | 139338-139487             | -           | 150 |
| 14028S      | STM14_0143  | 378448417 | -      | 140204-140338     |            | hypothetical protein                     | 139492-139626             | -           | 135 |
| 14028S      | STM14_0144  | 378448418 | +      | 140496-140633     |            | hypothetical protein                     | 139784-139921             | +           | 138 |
| 14028S      | STM14_0165  | 378448438 | +      | 162875-162979     |            | LysR family transcriptional regulator    | 162162-162266             | +           | 105 |
| 14028S      | STM14_0173  | 378448446 | -      | 168890-169072     |            | hypothetical protein                     | 168177-168359             | -           | 183 |
| 14028S      | STM14_0179  | 378448452 | -      | 173962-174090     |            | hypothetical protein                     | 173249-173377             | -           | 129 |
| 14028S      | STM14_0181  | 378448454 | +      | 175672-175794     |            | hypothetical protein                     | 174959-175081             | +           | 123 |
| 14028S      | STM14_0186  | 378448459 | +      | 183222-183350     |            | hypothetical protein                     | 182509-182637             | +           | 129 |
| 14028S      | STM14_0215  | 378448487 | -      | 213058-213171     |            | hypothetical protein                     | 212354-212467             | -           | 114 |
| 14028S      | STM14_0224  | 378448496 | +      | 221426-221587     |            | hypothetical protein                     | 220722-220883             | +           | 162 |
| 14028S      | STM14_0225  | 378448497 | -      | 221522-221629     |            | hypothetical protein                     | 220818-220925             | -           | 108 |
| 14028S      | STM14_0227  | 378448499 | -      | 224289-224429     |            | hypothetical protein                     | 223585-223725             | -           | 141 |
| 14028S      | STM14_0232  | 378448504 | +      | 230459-230665     |            | hypothetical protein                     | 229755-229961             | +           | 207 |
| 14028S      | STM14_0233  | 378448505 | +      | 231001-231144     |            | hypothetical protein                     | 230298-230441             | +           | 144 |
| 14028S      | STM14_0242  | 378448514 | +      | 239222-239365     |            | hypothetical protein                     | 238519-238662             | +           | 144 |
| 14028S      | STM14_0256  | 378448527 | +      | 254799-255083     |            | 30S ribosomal protein S2                 | 254095-254379             | +           | 285 |
| 14028S      | STM14_0262  | 378448533 | +      | 259830-260033     |            | hypothetical protein                     | 259126-259329             | +           | 204 |
| 14028S      | STM14_0292  | 378448562 | -      | 289616-289819     |            | hypothetical protein                     | 288917-289120             | -           | 204 |
| 14028S      | STM14_0310  | 378448574 | -      | 304859-304966     |            | hypothetical protein                     | 304160-304267             | -           | 108 |
| 14028S      | STM14_0322  | 378448585 | +      | 316755-316865     |            | invasol SirA                             | 316071-316181             | +           | 111 |
| 14028S      | STM14_0323  | 378448586 | +      | 316878-317324     |            | putative cytoplasmic protein             | 316194-316640             | +           | 447 |
| 14028S      | STM14_0337  | 378448600 | +      | 330303-330512     |            | hypothetical protein                     | 329619-329828             | +           | 210 |
| 14028S      | STM14_0343  | 378448606 | +      | 339144-339275     |            | hypothetical protein                     | 338460-338591             | +           | 132 |
| LT2         | STM04655    | 409994398 | -      | 339629-339871     |            | hypothetical protein                     | 339630-339872             | -           | 243 |
| ST474       | STM474_0312 | 379699516 | +      | 341562-341681     |            | hypothetical protein                     | 342085-342204             | +           | 120 |
| 14028S      | STM14_0359  | 378448619 | +      | 350359-350574     |            | putative cytoplasmic protein             | 349675-349890             | +           | 216 |
| 14028S      | STM14_0361  | 378448621 | -      | 351322-351450     |            | hypothetical protein                     | 350638-350766             | -           | 129 |
| 14028S      | STM14_0377  | 378448636 | -      | 366783-366935     |            | hypothetical protein                     | 366099-366251             | -           | 153 |
| D23580      | STM03491    | 378443784 | +      | 376059-376205     |            | prophage protein                         | 374854-375000             | -           | 147 |
| UK1         | STMUK_0331  | 378987726 | +      | 369132-369353     |            | putative inner membrane protein          | 410549-410770             | +           | 222 |
| 14028S      | STM14_0390  | 378448647 | -      | 378258-378530     |            | putative cytoplasmic protein             | 418964-419236             | -           | 273 |
| 14028S      | STM14_0403  | 378448660 | -      | 390802-390939     |            | hypothetical protein                     | 428154-428291             | -           | 138 |
| 14028S      | STM14_0411  | 378448668 | +      | 399120-399233     |            | hypothetical protein                     | 436472-436585             | +           | 114 |
| 14028S      | STM14_0415  | 378448672 | +      | 402243-402422     |            | putative metal-binding transport protein | 439595-439774             | +           | 180 |
| 14028S      | STM14_0419  | 378448676 | +      | 409084-409218     |            | hypothetical protein                     | 446436-446570             | +           | 135 |
| 14028S      | STM14_0420  | 378448677 | -      | 409118-409237     |            | hypothetical protein                     | 446470-446589             | -           | 120 |
| 14028S      | STM14_0430  | 378448687 | +      | 418467-418640     |            | hypothetical protein                     | 455819-455992             | +           | 174 |
| 14028S      | STM14_0436  | 378448693 | +      | 425565-425684     |            | hypothetical protein                     | 462917-463036             | +           | 120 |
| 14028S      | STM14_0437  | 378448694 | -      | 425675-425827     |            | hypothetical protein                     | 463027-463179             | -           | 153 |
| 14028S      | STM14_0441  | 378448698 | -      | 430751-430909     |            | hypothetical protein                     | 468103-468261             | -           | 159 |
| 14028S      | STM14_0442  | 378448699 | +      | 430925-431059     |            | hypothetical protein                     | 468277-468411             | +           | 135 |
| 14028S      | STM14_0446  | 378448703 | +      | 433714-433827     |            | hypothetical protein                     | 471066-471179             | +           | 114 |
| 14028S      | STM14_0451  | 378448708 | +      | 437620-437742     |            | hypothetical protein                     | 474972-475094             | +           | 123 |
| 14028S      | STM14_0453  | 378448710 | -      | 438082-438243     |            | hypothetical protein                     | 475434-475595             | -           | 162 |
| 14028S      | STM14_0457  | 378448714 | +      | 440792-440941     |            | hypothetical protein                     | 478144-478293             | +           | 150 |
| 14028S      | STM14_0464  | 378448721 | -      | 444556-444687     |            | hypothetical protein                     | 481908-482039             | -           | 132 |
| 14028S      | STM14_0472  | 378448729 | -      | 453755-453904     |            | hypothetical protein                     | 491107-491256             | -           | 150 |
| 14028S      | STM14_0479  | 378448736 | +      | 461340-461450     |            | DNA metabolism protein                   | 498692-498802             | +           | 111 |
| 14028S      | STM14_0487  | 378448744 | +      | 467631-467846     |            | hypothetical protein                     | 504983-505198             | +           | 216 |
| D23580      | STM04821    | 378443916 | -      | 507659-507985     |            | hypothetical protein                     | 505201-505527             | -           | 327 |
| 14028S      | STM14_0491  | 378448747 | +      | 469965-470111     |            | hypothetical protein                     | 507317-507463             | +           | 147 |
| 14028S      | STM14_0498  | 378448754 | -      | 473976-474284     |            | hypothetical protein                     | 511328-511636             | -           | 309 |
| 14028S      | STM14_0509  | 378448765 | -      | 484792-484902     |            | hypothetical protein                     | 522144-522254             | -           | 111 |
| ST474       | STM474_0464 | 379699664 | -      | 497880-498002     |            | hypothetical protein                     | 536439-536561             | -           | 123 |
| 14028S      | STM14_0526  | 378448781 | +      | 501468-501653     |            | hypothetical protein                     | 538820-539005             | +           | 186 |
| 14028S      | STM14_0528  | 378448783 | -      | 502053-502166     |            | hypothetical protein                     | 539405-539518             | -           | 114 |
| 14028S      | STM14_0531  | 378448786 | +      | 504670-504774     |            | hypothetical protein                     | 542022-542126             | +           | 105 |
| 14028S      | STM14_0536  | 378448791 | -      | 511028-511390     |            | hypothetical protein                     | 548380-548742             | -           | 363 |
| 14028S      | STM14_0562  | 378448816 | -      | 535085-535210     |            | hypothetical protein                     | 572438-572563             | -           | 126 |
| 14028S      | STM14_0573  | 378448827 | -      | 546597-546818     |            | hypothetical protein                     | 583950-584171             | -           | 222 |
| 14028S      | STM14_0575  | 378448829 | +      | 547392-547598     |            | hypothetical protein                     | 584745-584951             | +           | 207 |
| 14028S      | STM14_0599  | 378448853 | -      | 571546-571650     |            | hypothetical protein                     | 608899-609003             | -           | 105 |
| 14028S      | STM14_0633  | 378448887 | -      | 604316-604444     |            | hypothetical protein                     | 641669-641797             | -           | 129 |
| 14028S      | STM14_0634  | 378448888 | +      | 604400-604555     |            | hypothetical protein                     | 641753-641908             | +           | 156 |
| 14028S      | STM14_0645  | 378448899 | +      | 614019-614189     |            | hypothetical protein                     | 651372-651542             | +           | 171 |
| 14028S      | STM14_0647  | 378448900 | -      | 614287-614475     |            | integrase                                | 651640-651828             | -           | 189 |
| 14028S      | STM14_0659  | 378448908 | -      | 622266-622520     |            | hypothetical protein                     | 659619-659873             | -           | 255 |
| 14028S      | STM14_0665  | 378448914 | +      | 627603-627788     |            | hypothetical protein                     | 664956-665141             | +           | 186 |

|        |             |           |   |                 |                                  |                 |   |     |
|--------|-------------|-----------|---|-----------------|----------------------------------|-----------------|---|-----|
| 140285 | STM14_0677  | 378448926 | + | 639577-639684   | hypothetical protein             | 676936-677043   | + | 108 |
| 140285 | STM14_0683  | 378448932 | - | 644504-644635   | hypothetical protein             | 681863-681994   | - | 132 |
| 140285 | STM14_0698  | 378448947 | + | 661861-661971   | hypothetical protein             | 699220-699330   | + | 111 |
| 140285 | STM14_0714  | 378448963 | + | 678228-678434   | hypothetical protein             | 715785-715991   | + | 207 |
| 140285 | STM14_0715  | 378448964 | - | 678399-678539   | hypothetical protein             | 715956-716096   | - | 141 |
| 140285 | STM14_0726  | 378448975 | + | 688331-688513   | hypothetical protein             | 725888-726070   | + | 183 |
| 140285 | STM14_0730  | 378448979 | + | 692333-692443   | hypothetical protein             | 729890-730000   | + | 111 |
| 140285 | STM14_0735  | 378448984 | + | 694969-695076   | hypothetical protein             | 732526-732633   | + | 108 |
| 140285 | STM14_0738  | 378448987 | - | 696364-696498   | hypothetical protein             | 733921-734055   | - | 135 |
| 140285 | STM14_0740  | 378448989 | - | 697584-697727   | hypothetical protein             | 735141-735284   | - | 144 |
| 140285 | STM14_0742  | 378448991 | + | 698354-698719   | hypothetical protein             | 735911-736276   | + | 366 |
| 140285 | STM14_0745  | 378448994 | + | 700128-700277   | hypothetical protein             | 737685-737834   | + | 150 |
| 140285 | STM14_0774  | 378449022 | + | 730309-730596   | hypothetical protein             | 767865-768152   | + | 288 |
| 140285 | STM14_0777  | 378449025 | - | 733102-733251   | hypothetical protein             | 770658-770807   | - | 150 |
| 140285 | STM14_0780  | 378449028 | - | 734838-734957   | hypothetical protein             | 772394-772513   | - | 120 |
| 140285 | STM14_0791  | 378449032 | + | 739310-739477   | hypothetical protein             | 776866-777033   | + | 168 |
| 140285 | STM14_0797  | 378449038 | - | 745470-745595   | hypothetical protein             | 783026-783151   | - | 126 |
| 140285 | STM14_0800  | 378449041 | + | 749621-749734   | hypothetical protein             | 787177-787290   | + | 114 |
| 140285 | STM14_0801  | 378449042 | + | 749864-750154   | hypothetical protein             | 787420-787710   | + | 291 |
| 140285 | STM14_0809  | 378449050 | + | 757442-757591   | hypothetical protein             | 794998-795147   | + | 150 |
| 140285 | STM14_0812  | 378449053 | + | 758607-758720   | hypothetical protein             | 796163-796276   | + | 114 |
| 140285 | STM14_0819  | 378449060 | - | 766193-766318   | hypothetical protein             | 803749-803874   | - | 126 |
| 140285 | STM14_0826  | 378449067 | - | 774532-774729   | K+-transporting ATPase subunit F | 812088-812285   | - | 198 |
| 140285 | STM14_0834  | 378449075 | + | 781934-782065   | putative cytoplasmic protein     | 820267-820398   | + | 132 |
| 140285 | STM14_0850  | 378449091 | + | 797694-798080   | putative inner membrane protein  | 836027-836413   | + | 387 |
| 140285 | STM14_0859  | 378449100 | + | 808472-808597   | hypothetical protein             | 846805-846930   | + | 126 |
| ST474  | STM474_0763 | 379699951 | + | 807598-807723   | hypothetical protein             | 847017-847142   | + | 126 |
| ST474  | STM474_0764 | 379699952 | - | 808597-808710   | hypothetical protein             | 848016-848129   | - | 114 |
| 140285 | STM14_0860  | 378449101 | - | 809819-809962   | hypothetical protein             | 848152-848295   | - | 144 |
| 140285 | STM14_0873  | 378449114 | - | 818715-819254   | hypothetical protein             | 857048-857587   | - | 540 |
| 140285 | STM14_0879  | 378449115 | - | 820227-820322   | hypothetical protein             | 858715-858810   | - | 96  |
| 140285 | STM14_0897  | 378449132 | - | 837473-837664   | hypothetical protein             | 875961-876152   | - | 192 |
| 140285 | STM14_0903  | 378449138 | + | 843123-843230   | hypothetical protein             | 881611-881718   | + | 108 |
| ST474  | STM474_0818 | 379700001 | + | 857893-858006   | hypothetical protein             | 897466-897579   | + | 114 |
| 140285 | STM14_0924  | 378449158 | + | 864209-864493   | hypothetical protein             | 902696-902980   | + | 285 |
| 140285 | STM14_0925  | 378449159 | + | 864550-864777   | hypothetical protein             | 903037-903264   | + | 228 |
| 140285 | STM14_0927  | 378449161 | + | 867104-867277   | putative cytoplasmic protein     | 905591-905764   | + | 174 |
| 140285 | STM14_0946  | 378449180 | - | 881747-881884   | hypothetical protein             | 920299-920436   | - | 138 |
| 140285 | STM14_0952  | 378449186 | - | 888006-888110   | hypothetical protein             | 926558-926662   | - | 105 |
| 140285 | STM14_0956  | 378449190 | + | 891948-892067   | hypothetical protein             | 930500-930619   | + | 120 |
| 140285 | STM14_0958  | 378449192 | - | 892325-892444   | hypothetical protein             | 930877-930996   | - | 120 |
| 140285 | STM14_0961  | 378449195 | + | 895674-895811   | hypothetical protein             | 934226-934363   | + | 138 |
| 140285 | STM14_0965  | 378449199 | - | 898059-898181   | hypothetical protein             | 936611-936733   | - | 123 |
| 140285 | STM14_0967  | 378449201 | - | 899158-899316   | hypothetical protein             | 937710-937868   | - | 159 |
| 140285 | STM14_0969  | 378449203 | - | 900254-900415   | hypothetical protein             | 938806-938967   | - | 162 |
| 140285 | STM14_0970  | 378449204 | - | 900375-900506   | hypothetical protein             | 938927-939058   | - | 132 |
| 140285 | STM14_0973  | 378449207 | + | 902910-903080   | hypothetical protein             | 941462-941632   | + | 171 |
| 140285 | STM14_0982  | 378449216 | + | 911396-911509   | hypothetical protein             | 949948-950061   | + | 114 |
| 140285 | STM14_0986  | 378449220 | - | 915878-916033   | hypothetical protein             | 954430-954585   | - | 156 |
| 140285 | STM14_0989  | 378449223 | + | 917997-918137   | hypothetical protein             | 956549-956689   | + | 141 |
| 140285 | STM14_0995  | 378449229 | - | 924480-924599   | hypothetical protein             | 963032-963151   | - | 120 |
| 140285 | STM14_0997  | 378449231 | + | 925933-926067   | hypothetical protein             | 964485-964619   | + | 135 |
| 140285 | STM14_0999  | 378449233 | + | 926622-926762   | hypothetical protein             | 965174-965314   | + | 141 |
| 140285 | STM14_1000  | 378449234 | + | 926970-927134   | hypothetical protein             | 965522-965686   | + | 165 |
| 140285 | STM14_1006  | 378449239 | - | 931103-931243   | hypothetical protein             | 969655-969795   | - | 141 |
| 140285 | STM14_1010  | 378449243 | + | 934780-934917   | hypothetical protein             | 973332-973469   | + | 138 |
| 140285 | STM14_1019  | 378449251 | + | 942902-943027   | hypothetical protein             | 981454-981579   | + | 126 |
| 140285 | STM14_1034  | 378449266 | + | 955378-955569   | hypothetical protein             | 994707-994898   | + | 192 |
| 140285 | STM14_1038  | 378449270 | - | 958765-958965   | hypothetical protein             | 998094-998294   | - | 201 |
| 140285 | STM14_1053  | 378449285 | + | 972908-973111   | hypothetical protein             | 1012237-1012440 | + | 204 |
| 140285 | STM14_1055  | 378449287 | + | 973986-974153   | hypothetical protein             | 1013315-1013482 | + | 168 |
| 140285 | STM14_1060  | 378449292 | - | 980013-980138   | hypothetical protein             | 1019342-1019467 | - | 126 |
| 140285 | STM14_1061  | 378449293 | + | 980033-980176   | hypothetical protein             | 1019362-1019505 | + | 144 |
| 140285 | STM14_1067  | 378449299 | - | 984062-984343   | hypothetical protein             | 1023391-1023672 | - | 282 |
| 140285 | STM14_1069  | 378449301 | - | 985102-985260   | hypothetical protein             | 1024431-1024589 | - | 159 |
| 140285 | STM14_1076  | 378449307 | - | 988822-989205   | putative inner membrane protein  | 1028151-1028534 | - | 384 |
| 140285 | STM14_1081  | 378449312 | - | 994689-994946   | hypothetical protein             | 1034018-1034275 | - | 258 |
| 140285 | STM14_1082  | 378449313 | - | 994867-995142   | hypothetical protein             | 1034196-1034471 | - | 276 |
| 140285 | STM14_1087  | 378449318 | + | 1001941-1002111 | hypothetical protein             | 1041240-1041410 | + | 171 |
| 140285 | STM14_1092  | 378449323 | + | 1007647-1007754 | hypothetical protein             | 1046946-1047053 | + | 108 |
| 140285 | STM14_1093  | 378449324 | - | 1007837-1007968 | hypothetical protein             | 1047136-1047267 | - | 132 |
| 140285 | STM14_1097  | 378449328 | - | 1011963-1012289 | putative cytoplasmic protein     | 1051262-1051588 | - | 327 |
| 140285 | STM14_1102  | 378449333 | + | 1018831-1018959 | hypothetical protein             | 1058130-1058258 | + | 129 |
| 140285 | STM14_1104  | 378449335 | + | 1019641-1019754 | hypothetical protein             | 1058940-1059053 | + | 114 |
| 140285 | STM14_1108  | 378449339 | - | 1023127-1023381 | hypothetical protein             | 1062426-1062680 | - | 255 |
| 140285 | STM14_1118  | 378449349 | - | 1033792-1033944 | hypothetical protein             | 1073091-1073243 | - | 153 |
| 140285 | STM14_1129  | 378449360 | - | 1047995-1048126 | hypothetical protein             | 1087294-1087425 | - | 132 |
| 140285 | STM14_1131  | 378449362 | + | 1049521-1049673 | hypothetical protein             | 1088820-1088972 | + | 153 |
| 140285 | STM14_1133  | 378449364 | - | 1051307-1051426 | hypothetical protein             | 1090606-1090725 | - | 120 |
| 140285 | STM14_1137  | 378449368 | + | 1053504-1053662 | hypothetical protein             | 1092803-1092961 | + | 159 |
| ST474  | STM474_0999 | 379700176 | + | 1061436-1061582 | hypothetical protein             | 1102569-1102715 | + | 147 |
| ST474  | STM474_1001 | 379700178 | + | 1061983-1062096 | hypothetical protein             | 1103116-1103229 | + | 114 |
| 140285 | STM14_1150  | 378449381 | + | 1064144-1064518 | regulatory protein               | 1103485-1103859 | + | 375 |
| 140285 | STM14_1157  | 378449388 | + | 1068009-1068230 | hypothetical protein             | 1107350-1107571 | + | 222 |
| 140285 | STM14_1161  | 378449392 | + | 1069732-1069878 | hypothetical protein             | 1109073-1109219 | + | 147 |
| 140285 | STM14_1164  | 378449395 | + | 1071223-1071348 | hypothetical protein             | 1110564-1110689 | + | 126 |
| 140285 | STM14_3197  | 378451364 | + | 2811771-2811908 | hypothetical protein             | 1112417-1112554 | - | 138 |
| ST474  | STM474_1045 | 379700222 | + | 1098511-1098666 | hypothetical protein             | 1139874-1140029 | + | 156 |
| 140285 | STM14_1196  | 378449426 | - | 1100627-1100926 | hypothetical protein             | 1139967-1140266 | - | 300 |
| 140285 | STM14_1201  | 378449431 | - | 1106320-1106445 | hypothetical protein             | 1145660-1145785 | - | 126 |
| 140285 | STM14_1209  | 378449439 | - | 1115818-1116021 | hypothetical protein             | 1155159-1155362 | - | 204 |
| 140285 | STM14_1216  | 378449446 | - | 1121248-1121352 | hypothetical protein             | 1160589-1160693 | - | 105 |
| 140285 | STM14_1234  | 378449463 | + | 1135671-1135796 | hypothetical protein             | 1175012-1175137 | + | 126 |

|        |             |           |   |                 |                                                       |                 |   |     |
|--------|-------------|-----------|---|-----------------|-------------------------------------------------------|-----------------|---|-----|
| 140285 | STM14_1235  | 378449464 | + | 1135887-1136207 | putative inner membrane protein                       | 1175228-1175548 | + | 321 |
| 140285 | orfX        | 378449467 | + | 1138592-1138762 | putative cytoplasmic protein                          | 1177933-1178103 | + | 171 |
| 140285 | STM14_1239  | 378449468 | - | 1138763-1138873 | putative cytoplasmic protein                          | 1178104-1178214 | - | 111 |
| 140285 | STM14_1245  | 378449474 | + | 1143361-1143543 | hypothetical protein                                  | 1182702-1182884 | + | 183 |
| 140285 | STM14_1249  | 378449478 | - | 1146275-1146388 | hypothetical protein                                  | 1185616-1185729 | - | 114 |
| 140285 | STM14_1254  | 378449483 | - | 1150549-1150701 | hypothetical protein                                  | 1189890-1190042 | - | 153 |
| 140285 | STM14_1260  | 378449489 | - | 1155618-1155782 | hypothetical protein                                  | 1194959-1195123 | - | 165 |
| 140285 | STM14_1265  | 378449494 | - | 1158383-1158577 | hypothetical protein                                  | 1197724-1197918 | - | 195 |
| 140285 | STM14_1273  | 378449502 | + | 1164294-1164521 | hypothetical protein                                  | 1203635-1203862 | + | 228 |
| 140285 | STM14_1279  | 378449506 | - | 1170030-1170278 | hypothetical protein                                  | 1209371-1209619 | - | 249 |
| 140285 | STM14_1280  | 378449507 | - | 1170167-1170286 | hypothetical protein                                  | 1209508-1209627 | - | 120 |
| 140285 | STM14_1282  | 378449509 | + | 1172347-1172457 | hypothetical protein                                  | 1211688-1211798 | + | 111 |
| 140285 | STM14_1286  | 378449512 | + | 1174679-1174783 | hypothetical protein                                  | 1214020-1214124 | + | 105 |
| 140285 | STM14_1288  | 378449514 | + | 1176314-1176421 | hypothetical protein                                  | 1215655-1215762 | + | 108 |
| 140285 | STM14_1289  | 378449515 | - | 1176396-1176605 | hypothetical protein                                  | 1215737-1215946 | - | 210 |
| 140285 | STM14_1291  | 378449517 | - | 1177413-1177520 | hypothetical protein                                  | 1216754-1216861 | - | 108 |
| 140285 | STM14_1292  | 378449518 | + | 1177573-1177704 | hypothetical protein                                  | 1216914-1217045 | + | 132 |
| 140285 | STM14_1298  | 378449523 | - | 1183064-1183228 | hypothetical protein                                  | 1222589-1222753 | - | 165 |
| 140285 | STM14_1307  | 378449532 | - | 1188559-1188696 | hypothetical protein                                  | 1228083-1228220 | - | 138 |
| 140285 | STM14_1308  | 378449533 | - | 1188894-1189040 | hypothetical protein                                  | 1228418-1228564 | - | 147 |
| 140285 | STM14_1316  | 378449541 | - | 1194339-1194509 | hypothetical protein                                  | 1233863-1234033 | - | 171 |
| 140285 | STM14_1322  | 378449547 | + | 1200601-1201062 | hypothetical protein                                  | 1240125-1240586 | + | 462 |
| 140285 | STM14_1327  | 378449552 | + | 1204177-1204380 | hypothetical protein                                  | 1243701-1243904 | + | 204 |
| 140285 | STM14_1339  | 378449564 | - | 1212983-1213159 | hypothetical protein                                  | 1252507-1252683 | - | 177 |
| 140285 | STM14_1344  | 378449569 | - | 1216241-1216396 | flagellar basal body P-ring biosynthesis protein FigA | 1255765-1255920 | - | 156 |
| 140285 | STM14_1356  | 378449581 | - | 1226280-1226474 | hypothetical protein                                  | 1265804-1265998 | - | 195 |
| 140285 | STM14_1376  | 378449600 | - | 1244261-1244398 | hypothetical protein                                  | 1283785-1283922 | - | 138 |
| 140285 | STM14_1390  | 378449614 | - | 1256910-1257065 | hypothetical protein                                  | 1296344-1296589 | - | 156 |
| 140285 | STM14_1399  | 378449623 | - | 1267794-1267916 | hypothetical protein                                  | 1307318-1307440 | - | 123 |
| 140285 | STM14_1401  | 378449625 | - | 1269076-1269240 | hypothetical protein                                  | 1308600-1308764 | - | 165 |
| 140285 | STM14_1487  | 378449708 | - | 1337214-1337372 | hypothetical protein                                  | 1324926-1325084 | - | 159 |
| 140285 | STM14_1488  | 378449709 | + | 1337312-1337452 | hypothetical protein                                  | 1325024-1325164 | + | 141 |
| 140285 | STM14_1489  | 378449710 | + | 1337337-1337585 | hypothetical protein                                  | 1325049-1325297 | + | 249 |
| 140285 | STM14_1494  | 378449714 | - | 1340405-1340575 | hypothetical protein                                  | 1328117-1328287 | - | 171 |
| 140285 | STM14_1496  | 378449716 | - | 1341060-1341188 | hypothetical protein                                  | 1328772-1328900 | - | 129 |
| 140285 | pagD        | 378449717 | - | 1341151-1341414 | virulence protein PAGD precursor                      | 1328863-1329126 | - | 264 |
| 140285 | STM14_1499  | 378449718 | + | 1341718-1341825 | hypothetical protein                                  | 1329430-1329537 | + | 108 |
| 140285 | STM14_1500  | 378449719 | - | 1342043-1342192 | hypothetical protein                                  | 1329755-1329904 | - | 150 |
| 140285 | STM14_1502  | 378449721 | - | 1342962-1343096 | hypothetical protein                                  | 1330674-1330808 | - | 135 |
| 140285 | STM14_1506  | 378449723 | - | 1344493-1344636 | hypothetical protein                                  | 1332205-1332348 | - | 144 |
| ST474  | STM474_1249 | 379700419 | - | 1291877-1292050 | hypothetical protein                                  | 1332711-1332884 | - | 174 |
| 140285 | STM14_1510  | 378449727 | - | 1346067-1346216 | putative inner membrane protein                       | 1333779-1333928 | - | 150 |
| 140285 | STM14_1514  | 378449731 | - | 1348508-1348666 | hypothetical protein                                  | 1336219-1336377 | - | 159 |
| 140285 | STM14_1524  | 378449740 | - | 1356451-1356600 | hypothetical protein                                  | 1344162-1344311 | - | 120 |
| 140285 | STM14_1528  | 378449744 | + | 1358977-1359201 | hypothetical protein                                  | 1346688-1346912 | + | 255 |
| 140285 | STM14_1533  | 378449749 | - | 1361225-1361380 | hypothetical protein                                  | 1348936-1349091 | - | 156 |
| 140285 | STM14_1536  | 378449752 | - | 1362034-1362159 | hypothetical protein                                  | 1349745-1349870 | - | 126 |
| 140285 | STM14_1538  | 378449754 | + | 1362921-1363106 | hypothetical protein                                  | 1350632-1350817 | + | 186 |
| 140285 | STM14_1540  | 378449756 | - | 1363413-1363529 | hypothetical protein                                  | 1351124-1351240 | - | 117 |
| 140285 | STM14_1541  | 378449757 | - | 1363501-1363599 | hypothetical protein                                  | 1351212-1351310 | - | 99  |
| 140285 | STM14_1545  | 378449761 | - | 1364743-1364856 | hypothetical protein                                  | 1352454-1352567 | - | 114 |
| 140285 | STM14_1546  | 378449762 | + | 1364774-1364911 | hypothetical protein                                  | 1352485-1352622 | + | 138 |
| 140285 | STM14_1550  | 378449766 | + | 1367385-1367522 | hypothetical protein                                  | 1355096-1355233 | + | 138 |
| 140285 | STM14_1554  | 378449770 | + | 1370048-1370245 | hypothetical protein                                  | 1357759-1357956 | + | 198 |
| 140285 | STM14_1555  | 378449771 | + | 1370136-1370267 | salivary secreted protein                             | 1357847-1357978 | + | 132 |
| 140285 | STM14_1557  | 378449773 | + | 1371682-1371801 | hypothetical protein                                  | 1359393-1359512 | + | 120 |
| ST474  | STM474_1289 | 379700457 | + | 1320526-1320669 | hypothetical protein                                  | 1361360-1361503 | + | 144 |
| 140285 | STM14_1559  | 378449775 | - | 1373854-1374027 | hypothetical protein                                  | 1361564-1361737 | - | 174 |
| 140285 | STM14_1566  | 378449782 | + | 1379655-1379795 | hypothetical protein                                  | 1367365-1367505 | + | 141 |
| 140285 | STM14_1569  | 378449785 | + | 1380898-1381002 | hypothetical protein                                  | 1368609-1368713 | + | 105 |
| 140285 | STM14_1572  | 378449788 | + | 1382785-1382889 | hypothetical protein                                  | 1370496-1370600 | + | 105 |
| 140285 | STM14_1581  | 378449797 | + | 1391859-1392038 | hypothetical protein                                  | 1379570-1379749 | + | 180 |
| 140285 | STM14_1587  | 378449803 | + | 1398234-1398449 | hypothetical protein                                  | 1385945-1386160 | + | 216 |
| ST474  | STM474_1315 | 379700483 | + | 1347752-1347886 | hypothetical protein                                  | 1388586-1388720 | + | 135 |
| 140285 | STM14_1591  | 378449807 | - | 1400923-1401129 | hypothetical protein                                  | 1388634-1388840 | - | 207 |
| 140285 | STM14_1593  | 378449809 | + | 1401610-1401732 | hypothetical protein                                  | 1389321-1389443 | + | 123 |
| 140285 | STM14_1601  | 378449817 | + | 1409372-1409509 | hypothetical protein                                  | 1397083-1397220 | + | 138 |
| 140285 | STM14_1602  | 378449818 | - | 1409399-1409647 | hypothetical protein                                  | 1397110-1397358 | - | 249 |
| 140285 | STM14_1615  | 378449831 | + | 1419534-1419740 | hypothetical protein                                  | 1407245-1407451 | + | 207 |
| 140285 | STM14_1617  | 378449833 | + | 1421769-1421954 | hypothetical protein                                  | 1409480-1409665 | + | 186 |
| 140285 | STM14_1618  | 378449834 | + | 1421956-1422090 | hypothetical protein                                  | 1409667-1409801 | + | 135 |
| 140285 | STM14_1623  | 378449839 | - | 1425398-1425562 | hypothetical protein                                  | 1413109-1413273 | - | 165 |
| 140285 | STM14_1631  | 378449847 | + | 1432577-1432696 | hypothetical protein                                  | 1420288-1420407 | - | 120 |
| 140285 | STM14_1636  | 378449852 | + | 1436467-1436571 | hypothetical protein                                  | 1424178-1424282 | + | 105 |
| ST474  | STM474_1353 | 379700521 | + | 1384122-1384307 | hypothetical protein                                  | 1424956-1425141 | + | 186 |
| 140285 | STM14_1645  | 378449861 | - | 1445506-1445658 | hypothetical protein                                  | 1433217-1433369 | - | 153 |
| 140285 | STM14_1652  | 378449868 | + | 1452598-1452744 | hypothetical protein                                  | 1440309-1440455 | + | 147 |
| 140285 | STM14_1653  | 378449869 | - | 1452728-1452838 | hypothetical protein                                  | 1440439-1440549 | - | 111 |
| 140285 | STM14_1658  | 378449873 | - | 1456308-1456475 | hypothetical protein                                  | 1444019-1444186 | - | 168 |
| ST474  | STM474_1383 | 379700550 | - | 1418471-1418587 | hypothetical protein                                  | 1459306-1459422 | - | 117 |
| ST474  | STM474_1395 | 379700562 | + | 1431868-1432002 | hypothetical protein                                  | 1472703-1472837 | + | 135 |
| 140285 | STM14_1685  | 378449900 | - | 1486016-1486129 | hypothetical protein                                  | 1473727-1473840 | - | 114 |
| 140285 | STM14_1692  | 378449907 | + | 1493410-1493517 | hypothetical protein                                  | 1481121-1481228 | + | 108 |
| 140285 | STM14_1719  | 378449934 | + | 1511477-1511602 | hypothetical protein                                  | 1499188-1499313 | + | 126 |
| 140285 | STM14_1728  | 378449941 | + | 1519171-1519452 | hypothetical protein                                  | 1506882-1507163 | + | 282 |
| 140285 | STM14_1751  | 378449964 | + | 1538110-1538277 | hypothetical protein                                  | 1525821-1525988 | + | 168 |
| 140285 | STM14_1761  | 410023179 | - | 1546024-1546179 | hypothetical protein                                  | 1533735-1533890 | - | 156 |
| 140285 | STM14_1764  | 378449977 | + | 1548438-1548683 | hypothetical protein                                  | 1536149-1536394 | + | 246 |
| 140285 | STM14_1771  | 378449982 | + | 1553745-1553906 | fumarase A                                            | 1541456-1541617 | + | 162 |
| 140285 | STM14_1776  | 378449987 | - | 1559385-1559690 | outer membrane protein                                | 1547096-1547401 | - | 306 |
| 140285 | STM14_1782  | 378449992 | - | 1563882-1564016 | putative amino acid permease                          | 1551593-1551727 | - | 135 |
| 140285 | STM14_1783  | 378449993 | - | 1563914-1564087 | hypothetical protein                                  | 1551625-1551798 | - | 174 |
| 140285 | STM14_1784  | 378449994 | + | 1564099-1564224 | hypothetical protein                                  | 1551810-1551935 | + | 126 |

|        |             |           |   |                 |                                                 |                 |   |     |
|--------|-------------|-----------|---|-----------------|-------------------------------------------------|-----------------|---|-----|
| 140285 | STM14_1786  | 378449996 | + | 1565234-1565359 | hypothetical protein                            | 1552945-1553070 | + | 126 |
| 140285 | STM14_1790  | 378450000 | + | 1569946-1570116 | hypothetical protein                            | 1557657-1557827 | + | 171 |
| 140285 | STM14_1794  | 378450004 | - | 1571734-1572027 | hypothetical protein                            | 1559445-1559738 | - | 294 |
| 140285 | STM14_1796  | 378450006 | - | 1572462-1572653 | hypothetical protein                            | 1560173-1560364 | - | 192 |
| 140285 | STM14_1810  | 378450020 | - | 1586812-1587033 | putative dimethyl sulfoxide reductase subunit A | 1574523-1574744 | - | 222 |
| 140285 | STM14_1816  | 378450026 | - | 1591641-1591757 | hypothetical protein                            | 1579352-1579468 | - | 117 |
| ST474  | STM474_1518 | 379700677 | - | 1542834-1542947 | hypothetical protein                            | 1583669-1583782 | - | 114 |
| 140285 | STM14_1827  | 378450036 | - | 1601704-1601919 | hypothetical protein                            | 1589415-1589630 | - | 216 |
| 140285 | STM14_1828  | 378450037 | + | 1601786-1601923 | peptidyl-dipeptidase dcp                        | 1589497-1589634 | + | 138 |
| 140285 | STM14_1831  | 378450040 | - | 1602970-1603068 | hypothetical protein                            | 1590681-1590779 | - | 99  |
| 140285 | STM14_1847  | 378450056 | + | 1615524-1615850 | putative inner membrane protein                 | 1603237-1603563 | + | 327 |
| 140285 | STM14_1867  | 378450076 | - | 1634718-1634879 | hypothetical protein                            | 1622431-1622592 | - | 162 |
| 140285 | STM14_1872  | 378450081 | + | 1637216-1637431 | putative phage-related secreted protein         | 1624929-1625144 | + | 216 |
| UK1    | STMUK_1520  | 378988892 | + | 1587048-1587440 | hypothetical protein                            | 1626570-1626962 | + | 393 |
| UK1    | STMUK_1521  | 378988893 | + | 1587577-1587705 | hypothetical protein                            | 1627099-1627227 | + | 129 |
| ST474  | STM474_1578 | 379700736 | - | 1602385-1602519 | hypothetical protein                            | 1643222-1643356 | - | 135 |
| 140285 | STM14_1890  | 378450098 | + | 1657503-1657634 | hypothetical protein                            | 1645216-1645347 | + | 132 |
| 140285 | STM14_1895  | 378450103 | + | 1663489-1663641 | hypothetical protein                            | 1651202-1651354 | + | 153 |
| 140285 | STM14_1897  | 378450105 | - | 1664885-1665067 | hypothetical protein                            | 1652598-1652780 | - | 183 |
| 140285 | STM14_1902  | 378450110 | + | 1668962-1669093 | hypothetical protein                            | 1656676-1656807 | + | 132 |
| 140285 | STM14_1904  | 378450112 | - | 1670559-1670702 | hypothetical protein                            | 1658273-1658416 | - | 144 |
| 140285 | STM14_1911  | 378450119 | - | 1679194-1679457 | hypothetical protein                            | 1666908-1667171 | - | 264 |
| 140285 | STM14_1913  | 378450121 | + | 1680178-1680390 | hypothetical protein                            | 1667892-1668104 | + | 213 |
| 140285 | STM14_1914  | 378450122 | - | 1680335-1680472 | hypothetical protein                            | 1668049-1668186 | - | 138 |
| 140285 | STM14_1915  | 378450123 | + | 1680342-1680476 | hypothetical protein                            | 1668056-1668190 | + | 135 |
| 140285 | STM14_1919  | 378450127 | - | 1683664-1683783 | hypothetical protein                            | 1671378-1671497 | - | 120 |
| 140285 | STM14_1922  | 378450130 | + | 1686850-1686969 | hypothetical protein                            | 1674564-1674683 | + | 120 |
| 140285 | STM14_1923  | 378450131 | - | 1686958-1687080 | hypothetical protein                            | 1674672-1674794 | - | 123 |
| 140285 | STM14_1933  | 378450141 | + | 1696703-1696807 | hypothetical protein                            | 1684417-1684521 | + | 105 |
| 140285 | STM14_1937  | 378450145 | - | 1700960-1701190 | putative inner membrane protein                 | 1688674-1688904 | - | 231 |
| 140285 | STM14_1939  | 378450147 | - | 1701681-1701785 | hypothetical protein                            | 1689935-1689499 | - | 105 |
| 140285 | STM14_1950  | 378450158 | + | 1711642-1711749 | hypothetical protein                            | 1699356-1699463 | + | 108 |
| 140285 | STM14_1961  | 378450169 | + | 1719701-1719814 | hypothetical protein                            | 1707415-1707528 | + | 114 |
| 140285 | STM14_1967  | 378450175 | + | 1727480-1727695 | hypothetical protein                            | 1715194-1715409 | + | 216 |
| 140285 | STM14_1970  | 378450178 | + | 1729598-1729999 | putative dipicolinate reductase                 | 1717312-1717713 | + | 402 |
| ST474  | STM474_1641 | 379700799 | + | 1676859-1677014 | hypothetical protein                            | 1717697-1717852 | + | 156 |
| 140285 | STM14_1972  | 378450180 | - | 1731028-1731132 | hypothetical protein                            | 1718742-1718846 | - | 105 |
| 140285 | STM14_1973  | 378450181 | + | 1731115-1731225 | hypothetical protein                            | 1718829-1718939 | + | 111 |
| 140285 | STM14_1976  | 378450184 | - | 1733662-1733814 | hypothetical protein                            | 1721376-1721528 | - | 153 |
| 140285 | STM14_1994  | 378450202 | + | 1751742-1752041 | hypothetical protein                            | 1739456-1739755 | + | 300 |
| 140285 | STM14_2004  | 378450212 | - | 1762419-1762580 | hypothetical protein                            | 1750133-1750294 | - | 162 |
| 140285 | STM14_2024  | 378450229 | - | 1779789-1779902 | hypothetical protein                            | 1767502-1767615 | - | 114 |
| 140285 | STM14_2048  | 378450253 | - | 1800491-1800637 | hypothetical protein                            | 1787493-1787639 | - | 147 |
| 140285 | STM14_2049  | 378450254 | + | 1800647-1800769 | hypothetical protein                            | 1787649-1787771 | + | 123 |
| 140285 | STM14_2051  | 378450256 | + | 1802254-1802433 | hypothetical protein                            | 1789256-1789435 | + | 180 |
| 140285 | ycjE        | 378450257 | + | 1802408-1802707 | putative cytoplasmic protein                    | 1789410-1789709 | + | 300 |
| 140285 | STM14_2054  | 378450259 | - | 1803682-1803798 | hypothetical protein                            | 1790684-1790800 | - | 117 |
| 140285 | STM14_2057  | 378450262 | + | 1807079-1807216 | hypothetical protein                            | 1794081-1794218 | + | 138 |
| 140285 | STM14_2061  | 378450266 | - | 1810467-1810628 | hypothetical protein                            | 1797469-1797630 | - | 162 |
| 140285 | STM14_2065  | 378450270 | + | 1812029-1812142 | hypothetical protein                            | 1799031-1799144 | + | 114 |
| 140285 | STM14_2073  | 378450278 | + | 1820026-1820190 | hypothetical protein                            | 1807028-1807192 | + | 165 |
| 140285 | STM14_2076  | 378450281 | - | 1823233-1823364 | hypothetical protein                            | 1810235-1810366 | - | 132 |
| 140285 | STM14_2079  | 378450284 | + | 1824904-1825014 | hypothetical protein                            | 1811906-1812016 | + | 111 |
| 140285 | trpL        | 378450289 | + | 1829100-1829144 | trp operon leader peptide                       | 1816102-1816146 | + | 45  |
| 140285 | ycjG        | 378450295 | + | 1836247-1836429 | putative cytoplasmic protein                    | 1823249-1823431 | + | 183 |
| 140285 | STM14_2111  | 378450314 | + | 1851996-1852310 | putative inner membrane protein                 | 1838998-1839312 | + | 315 |
| 140285 | STM14_2117  | 378450320 | + | 1858398-1858580 | hypothetical protein                            | 1845400-1845582 | + | 183 |
| 140285 | STM14_2123  | 378450326 | - | 1863160-1863279 | hypothetical protein                            | 1850162-1850281 | - | 120 |
| 140285 | STM14_2133  | 378450333 | + | 1872924-1873043 | hypothetical protein                            | 1859577-1859696 | + | 120 |
| 140285 | STM14_2135  | 378450335 | - | 1874718-1874903 | hypothetical protein                            | 1861371-1861556 | - | 186 |
| 140285 | STM14_2151  | 378450351 | - | 1888181-1888351 | hypothetical protein                            | 1874834-1875004 | - | 171 |
| 140285 | STM14_2152  | 378450352 | - | 1888329-1888433 | hypothetical protein                            | 1874982-1875086 | - | 105 |
| 140285 | STM14_2158  | 378450358 | - | 1893588-1893701 | hypothetical protein                            | 1880241-1880354 | - | 114 |
| 140285 | STM14_2160  | 378450360 | - | 1895293-1895421 | hypothetical protein                            | 1881946-1882074 | - | 129 |
| 140285 | STM14_2171  | 378450371 | - | 1905555-1905662 | hypothetical protein                            | 1892208-1892315 | - | 108 |
| 140285 | STM14_2180  | 378450380 | - | 1914824-1914934 | hypothetical protein                            | 1901477-1901587 | - | 111 |
| 140285 | STM14_2187  | 378450387 | + | 1920441-1920557 | hypothetical protein                            | 1907094-1907210 | + | 117 |
| 140285 | STM14_2188  | 378450388 | - | 1920620-1920757 | putative cytoplasmic protein                    | 1907273-1907410 | - | 138 |
| 140285 | STM14_2200  | 378450400 | + | 1928329-1928535 | hypothetical protein                            | 1914269-1914475 | + | 207 |
| 140285 | STM14_2211  | 378450411 | - | 1939453-1939788 | putative cytoplasmic protein                    | 1925393-1925728 | - | 336 |
| 140285 | STM14_2219  | 378450419 | - | 1946749-1946859 | hypothetical protein                            | 1932689-1932799 | - | 111 |
| 140285 | STM14_2222  | 378450422 | + | 1947434-1947541 | hypothetical protein                            | 1933374-1933481 | + | 108 |
| 140285 | STM14_2223  | 378450423 | + | 1947556-1947696 | hypothetical protein                            | 1933496-1933636 | + | 141 |
| 140285 | STM14_2224  | 378450424 | - | 1947624-1947740 | hypothetical protein                            | 1933564-1933680 | - | 117 |
| 140285 | STM14_2229  | 378450429 | - | 1949871-1949978 | hypothetical protein                            | 1935811-1935918 | - | 108 |
| 140285 | STM14_2238  | 378450438 | + | 1961391-1961522 | hypothetical protein                            | 1947331-1947462 | + | 132 |
| ST474  | STM474_1877 | 379701031 | + | 1908925-1909098 | hypothetical protein                            | 1948702-1948875 | - | 174 |
| 140285 | STM14_2243  | 378450443 | + | 1963183-1963311 | hypothetical protein                            | 1949123-1949251 | + | 129 |
| 140285 | STM14_2245  | 378450445 | + | 1964429-1964551 | hypothetical protein                            | 1950369-1950491 | + | 123 |
| 140285 | STM14_2246  | 378450446 | - | 1964644-1964787 | hypothetical protein                            | 1950584-1950727 | - | 144 |
| D23580 | STM14_18461 | 37845260  | + | 1947071-1947241 | hypothetical protein                            | 1951186-1951356 | + | 171 |
| 140285 | STM14_2250  | 378450450 | - | 1966960-1967154 | hypothetical protein                            | 1952900-1953094 | - | 195 |
| ST474  | STM474_1884 | 379701038 | - | 1913724-1913852 | hypothetical protein                            | 1953501-1953629 | - | 129 |
| 140285 | STM14_2261  | 378450458 | + | 1973229-1973375 | hypothetical protein                            | 1959169-1959315 | + | 147 |
| 140285 | STM14_2270  | 378450466 | + | 1976705-1976878 | hypothetical protein                            | 1960841-1961014 | + | 174 |
| 140285 | STM14_2271  | 378450467 | + | 1976808-1976927 | hypothetical protein                            | 1960944-1961063 | + | 120 |
| 140285 | STM14_2276  | 378450471 | - | 1979312-1979440 | hypothetical protein                            | 1963448-1963576 | - | 129 |
| 140285 | STM14_2277  | 378450472 | - | 1979524-1979643 | putative cytoplasmic protein                    | 1963660-1963779 | - | 120 |
| 140285 | STM14_2291  | 378450486 | - | 1990827-1990985 | hypothetical protein                            | 1974963-1975121 | - | 159 |
| 140285 | STM14_2293  | 378450488 | + | 1992662-1992787 | hypothetical protein                            | 1976798-1976923 | + | 126 |
| 140285 | STM14_2294  | 378450489 | + | 1992755-1992874 | hypothetical protein                            | 1976891-1977010 | + | 120 |
| 140285 | STM14_2298  | 378450493 | + | 1996367-1996594 | hypothetical protein                            | 1980503-1980730 | + | 228 |
| 140285 | STM14_2305  | 378450500 | + | 2002147-2002269 | hypothetical protein                            | 1986283-1986405 | + | 123 |

|        |             |           |   |                 |                                   |                 |   |     |
|--------|-------------|-----------|---|-----------------|-----------------------------------|-----------------|---|-----|
| 140285 | STM14_2306  | 378450501 | - | 2002264-2002389 | hypothetical protein              | 1986400-1986525 | - | 126 |
| 140285 | STM14_2313  | 378450507 | + | 2008446-2008562 | hypothetical protein              | 1992583-1992699 | + | 117 |
| 140285 | STM14_2321  | 378450515 | + | 2013869-2013985 | hypothetical protein              | 1998006-1998122 | + | 117 |
| 140285 | STM14_2323  | 378450517 | + | 2015793-2015897 | hypothetical protein              | 1999930-2000034 | + | 105 |
| 140285 | STM14_2329  | 378450523 | + | 2022930-2023187 | hypothetical protein              | 2007067-2007324 | + | 258 |
| 140285 | STM14_2339  | 378450533 | - | 2032400-2032531 | hypothetical protein              | 2016537-2016668 | - | 132 |
| 140285 | STM14_2342  | 378450536 | - | 2033684-2033827 | hypothetical protein              | 2017821-2017964 | - | 144 |
| 140285 | STM14_2343  | 378450537 | + | 2034145-2034261 | hypothetical protein              | 2018282-2018398 | + | 117 |
| 140285 | STM14_2349  | 378450542 | + | 2038156-2038305 | hypothetical protein              | 2022292-2022441 | + | 150 |
| D23580 | STMMW_19262 | 378445334 | - | 2022476-2022553 | hypothetical protein              | 2034507-2034584 | - | 78  |
| 140285 | STM14_2379  | 378450569 | - | 2060568-2060705 | hypothetical protein              | 2044704-2044841 | - | 138 |
| 140285 | STM14_2389  | 378450579 | - | 2067774-2067902 | hypothetical protein              | 2051910-2052038 | - | 129 |
| 140285 | STM14_2411  | 378450600 | + | 2084253-2084468 | hypothetical protein              | 2068389-2068604 | + | 216 |
| 140285 | STM14_2417  | 378450606 | + | 2088843-2088962 | hypothetical protein              | 2072979-2073098 | + | 120 |
| 140285 | STM14_2419  | 378450608 | - | 2090431-2090643 | putative cold-shock protein       | 2074567-2074779 | - | 213 |
| 140285 | STM14_2421  | 378450610 | - | 2091089-2091208 | hypothetical protein              | 2075225-2075344 | - | 120 |
| 140285 | STM14_2425  | 378450614 | - | 2093253-2093495 | hypothetical protein              | 2077389-2077631 | - | 243 |
| SL1344 | SL1344_1980 | 378699918 | + | 2082737-2083009 | hypothetical protein              | 2080563-2080835 | + | 273 |
| ST474  | STM474_2085 | 379701227 | - | 2082744-2082878 | hypothetical protein              | 2080570-2080704 | - | 135 |
| 798    | UMN798_2172 | 383496723 | - | 2087536-2087634 | hypothetical protein              | 2086001-2086099 | - | 99  |
| 140285 | STM14_2494  | 378450678 | - | 2142487-2142741 | hypothetical protein              | 2086477-2086731 | - | 255 |
| D23580 | STMMW_20421 | 378445447 | + | 2116462-2116623 | hypothetical protein              | 2088348-2088509 | + | 162 |
| 140285 | STM14_2497  | 378450681 | - | 2144828-2145214 | hypothetical protein              | 2088818-2089204 | - | 387 |
| 140285 | STM14_2498  | 378450682 | + | 2145540-2145707 | hypothetical protein              | 2089530-2089697 | + | 168 |
| 140285 | STM14_2501  | 378450684 | - | 2147387-2147539 | hypothetical protein              | 2091377-2091529 | - | 153 |
| 140285 | STM14_2524  | 378450706 | - | 2165668-2165799 | hypothetical protein              | 2109658-2109789 | - | 132 |
| 140285 | STM14_2549  | 378450731 | - | 2185570-2185701 | hypothetical protein              | 2129559-2129690 | - | 132 |
| 140285 | STM14_2556  | 378450738 | - | 2192950-2193219 | hypothetical protein              | 2136939-2137208 | - | 270 |
| 140285 | STM14_2558  | 378450740 | - | 2195674-2195796 | hypothetical protein              | 2139663-2139785 | - | 123 |
| 140285 | STM14_2561  | 378450743 | + | 2198729-2198896 | hypothetical protein              | 2142718-2142885 | + | 168 |
| 140285 | STM14_2562  | 378450744 | - | 2198740-2198937 | hypothetical protein              | 2142729-2142926 | - | 198 |
| 140285 | STM14_2599  | 378450781 | + | 2239941-2240216 | hypothetical protein              | 2183930-2184205 | + | 276 |
| 140285 | STM14_2614  | 378450796 | + | 2254277-2254522 | hypothetical protein              | 2198266-2198511 | + | 246 |
| 140285 | STM14_2623  | 378450805 | - | 2265633-2265749 | hypothetical protein              | 2209622-2209738 | - | 117 |
| 140285 | STM14_2635  | 378450816 | - | 2282708-2282821 | hypothetical protein              | 2226697-2226810 | - | 114 |
| 140285 | STM14_2638  | 378450818 | - | 2284669-2285004 | putative inner membrane protein   | 2228658-2228993 | - | 336 |
| 140285 | STM14_2639  | 378450819 | + | 2285114-2285233 | hypothetical protein              | 2229103-2229222 | + | 120 |
| 140285 | STM14_2640  | 378450820 | - | 2285366-2285482 | hypothetical protein              | 2229355-2229471 | - | 117 |
| 140285 | STM14_2649  | 378450829 | - | 2293497-2293682 | hypothetical protein              | 2237486-2237671 | - | 186 |
| 140285 | STM14_2651  | 378450831 | - | 2294185-2294343 | hypothetical protein              | 2238174-2238332 | - | 159 |
| ST474  | STM474_2254 | 379701393 | + | 2258581-2258763 | hypothetical protein              | 2256407-2256589 | + | 183 |
| 140285 | STM14_2671  | 378450851 | - | 2315124-2315237 | hypothetical protein              | 2259113-2259226 | - | 114 |
| 140285 | STM14_2674  | 378450854 | - | 2317916-2318191 | hypothetical protein              | 2261905-2262180 | - | 276 |
| 140285 | STM14_2676  | 378450856 | + | 2318810-2318917 | hypothetical protein              | 2262799-2262906 | + | 108 |
| 140285 | STM14_2680  | 378450860 | + | 2322009-2322206 | hypothetical protein              | 2265998-2266195 | + | 198 |
| 140285 | STM14_2697  | 378450877 | + | 2338065-2338184 | hypothetical protein              | 2282054-2282173 | + | 120 |
| 140285 | STM14_2701  | 378450881 | + | 2340683-2340847 | hypothetical protein              | 2284672-2284836 | + | 165 |
| 140285 | STM14_2704  | 378450884 | - | 2342649-2342762 | hypothetical protein              | 2286638-2286751 | - | 114 |
| 140285 | STM14_2705  | 378450885 | - | 2342720-2342848 | hypothetical protein              | 2286709-2286837 | - | 129 |
| 140285 | STM14_2706  | 378450886 | + | 2342834-2343067 | hypothetical protein              | 2286823-2287056 | + | 234 |
| 140285 | STM14_2710  | 378450890 | - | 2345635-2345787 | hypothetical protein              | 2289624-2289776 | - | 153 |
| 140285 | STM14_2716  | 378450896 | - | 2351963-2352097 | hypothetical protein              | 2295953-2296087 | - | 135 |
| 140285 | STM14_2718  | 378450898 | - | 2352991-2353110 | hypothetical protein              | 2296981-2297100 | - | 120 |
| ST474  | STM474_2293 | 379701432 | - | 2300273-2300395 | hypothetical protein              | 2298100-2298222 | - | 123 |
| 140285 | STM14_2724  | 378450904 | + | 2358928-2359059 | hypothetical protein              | 2302918-2303049 | + | 132 |
| UK1    | STMUK_2237  | 378989594 | - | 2307167-2307274 | hypothetical protein              | 2302965-2303072 | - | 108 |
| 140285 | STM14_2725  | 378450905 | + | 2359144-2359266 | hypothetical protein              | 2303134-2303256 | + | 123 |
| 140285 | STM14_2726  | 378450906 | - | 2359149-2359277 | hypothetical protein              | 2303139-2303267 | - | 129 |
| 140285 | STM14_2729  | 378450909 | - | 2361189-2361311 | putative inner membrane protein   | 2305179-2305301 | - | 123 |
| 140285 | STM14_2730  | 378450910 | - | 2361472-2361576 | hypothetical protein              | 2305462-2305566 | - | 105 |
| 140285 | STM14_2736  | 378450915 | - | 2364975-2365205 | hypothetical protein              | 2308965-2309195 | - | 231 |
| 140285 | STM14_2738  | 378450917 | + | 2365897-2366040 | hypothetical protein              | 2309887-2310030 | + | 144 |
| 140285 | STM14_2750  | 378450929 | - | 2378246-2378392 | hypothetical protein              | 2322236-2322382 | - | 147 |
| 140285 | STM14_2764  | 378450942 | - | 2389094-2389207 | hypothetical protein              | 2333084-2333197 | - | 114 |
| 140285 | STM14_2770  | 378450948 | - | 2394973-2395176 | putative phage tail fiber protein | 2338963-2339166 | - | 204 |
| 140285 | STM14_2774  | 378450952 | + | 2397715-2397861 | hypothetical protein              | 2341705-2341851 | + | 147 |
| 140285 | STM14_2791  | 378450969 | + | 2411310-2411441 | hypothetical protein              | 2355300-2355431 | + | 132 |
| 140285 | STM14_2798  | 378450976 | + | 2418131-2418256 | hypothetical protein              | 2362121-2362246 | + | 126 |
| 140285 | STM14_2803  | 378450980 | - | 2425164-2425280 | hypothetical protein              | 2369154-2369270 | - | 117 |
| 140285 | STM14_2805  | 378450982 | + | 2427980-2428210 | hypothetical protein              | 2371970-2372200 | + | 231 |
| 140285 | STM14_2806  | 378450983 | + | 2428153-2428293 | hypothetical protein              | 2372143-2372283 | + | 141 |
| 140285 | STM14_2811  | 378450988 | + | 2432657-2432773 | hypothetical protein              | 2376647-2376763 | + | 117 |
| 140285 | STM14_2822  | 378450999 | + | 2445948-2446052 | hypothetical protein              | 2389938-2390042 | + | 105 |
| 140285 | STM14_2823  | 378451000 | + | 2446155-2446358 | hypothetical protein              | 2390145-2390348 | + | 204 |
| 140285 | STM14_2834  | 378451011 | + | 2455277-2455405 | hypothetical protein              | 2399267-2399395 | + | 129 |
| 140285 | STM14_2854  | 378451030 | - | 2475407-2475529 | hypothetical protein              | 2419398-2419520 | - | 123 |
| 140285 | STM14_2855  | 378451031 | + | 2475538-2475645 | hypothetical protein              | 2419529-2419636 | + | 108 |
| 140285 | STM14_2856  | 378451032 | + | 2475654-2475836 | hypothetical protein              | 2419645-2419827 | + | 183 |
| 140285 | STM14_2870  | 378451046 | + | 2491031-2491153 | hypothetical protein              | 2435022-2435144 | + | 123 |
| 140285 | STM14_2871  | 378451047 | - | 2491241-2491357 | hypothetical protein              | 2435232-2435348 | - | 117 |
| 140285 | STM14_2872  | 378451048 | - | 2491445-2491597 | putative cytoplasmic protein      | 2435436-2435588 | - | 153 |
| 140285 | STM14_2880  | 378451056 | - | 2499179-2499430 | hypothetical protein              | 2443170-2443421 | - | 252 |
| 140285 | STM14_2881  | 378451057 | + | 2499320-2499454 | hypothetical protein              | 2443311-2443445 | + | 135 |
| 140285 | STM14_2902  | 378451078 | + | 2517875-2518045 | hypothetical protein              | 2461866-2462036 | + | 171 |
| 140285 | STM14_2911  | 378451087 | - | 2527947-2528102 | hypothetical protein              | 2471938-2472093 | - | 156 |
| 140285 | STM14_2921  | 378451097 | + | 2537322-2537438 | hypothetical protein              | 2481313-2481429 | + | 117 |
| 140285 | STM14_2940  | 378451116 | + | 2553683-2553823 | hypothetical protein              | 2497674-2497814 | + | 141 |
| 140285 | STM14_2941  | 378451117 | - | 2553820-2553948 | hypothetical protein              | 2497811-2497939 | - | 129 |
| 140285 | STM14_2955  | 378451130 | - | 2569137-2569283 | hypothetical protein              | 2513128-2513274 | - | 147 |
| 140285 | STM14_2959  | 378451134 | + | 2573587-2573775 | hypothetical protein              | 2517578-2517766 | + | 189 |
| 140285 | STM14_2986  | 378451155 | + | 2595762-2595923 | hypothetical protein              | 2539635-2539796 | + | 162 |
| 140285 | STM14_2988  | 378451157 | + | 2595966-2596094 | hypothetical protein              | 2539839-2539967 | + | 129 |
| 140285 | STM14_3032  | 378451201 | + | 2633812-2634012 | hypothetical protein              | 2577685-2577885 | + | 201 |

|        |             |           |   |                 |                                                               |                 |   |     |
|--------|-------------|-----------|---|-----------------|---------------------------------------------------------------|-----------------|---|-----|
| 14028S | STM14_3036  | 378451205 | - | 2637342-2637476 | hypothetical protein                                          | 2581215-2581349 | - | 135 |
| 14028S | STM14_3043  | 378451212 | - | 2645096-2645227 | hypothetical protein                                          | 2588969-2589100 | - | 132 |
| 14028S | STM14_3063  | 378451232 | - | 2664349-2664552 | hypothetical protein                                          | 2608221-2608424 | - | 204 |
| 14028S | STM14_3069  | 378451238 | - | 2672447-2672584 | putative cytoplasmic protein                                  | 2616319-2616456 | - | 138 |
| 14028S | STM14_3070  | 378451239 | - | 2672655-2672915 | putative inner membrane protein                               | 2616527-2616787 | - | 261 |
| 14028S | STM14_3072  | 378451241 | - | 2673033-2673269 | putative inner membrane protein                               | 2616905-2617141 | - | 237 |
| 14028S | STM14_3079  | 378451248 | + | 2685671-2685784 | hypothetical protein                                          | 2629543-2629656 | + | 114 |
| 14028S | STM14_3080  | 378451249 | + | 2685675-2685857 | hypothetical protein                                          | 2629547-2629729 | + | 183 |
| ST474  | STM474_2618 | 379701745 | + | 2646222-2646344 | hypothetical protein                                          | 2643931-2644053 | + | 123 |
| 14028S | STM14_3086  | 378451254 | + | 2702354-2702470 | hypothetical protein                                          | 2646227-2646343 | + | 117 |
| 14028S | STM14_3087  | 378451255 | - | 2702529-2702684 | hypothetical protein                                          | 2646402-2646557 | - | 156 |
| 14028S | STM14_3090  | 378451258 | + | 2704480-2704581 | hypothetical protein                                          | 2648353-2648454 | + | 102 |
| 14028S | STM14_3096  | 378451264 | - | 2710094-2710216 | type IV pilus biogenesis/stability protein PilV               | 2653967-2654089 | - | 123 |
| 14028S | STM14_3099  | 378451267 | + | 2712052-2712147 | hypothetical protein                                          | 2655925-2656020 | + | 96  |
| 14028S | STM14_3107  | 378451275 | - | 2725280-2725504 | hypothetical protein                                          | 2669153-2669377 | - | 225 |
| ST474  | STM474_2636 | 379701763 | + | 2671480-2671593 | hypothetical protein                                          | 2669189-2669302 | + | 114 |
| 14028S | STM14_3119  | 378451287 | + | 2734356-2734475 | hypothetical protein                                          | 2678229-2678348 | + | 120 |
| 14028S | STM14_3122  | 378451290 | + | 2735856-2735978 | hypothetical protein                                          | 2679729-2679851 | + | 123 |
| 14028S | STM14_3123  | 378451291 | - | 2735883-2735993 | hypothetical protein                                          | 2679756-2679866 | - | 111 |
| 14028S | STM14_3134  | 378451302 | - | 2746625-2746771 | hypothetical protein                                          | 2690498-2690644 | - | 147 |
| 14028S | STM14_3144  | 378451312 | + | 2759420-2759548 | hypothetical protein                                          | 2703293-2703421 | + | 129 |
| 14028S | STM14_3166  | 378451334 | + | 2782885-2783430 | transposase-like protein                                      | 2726764-2727309 | + | 546 |
| SL1344 | SL1344_2548 | 378700486 | - | 2730253-2730318 | bacteriophage protein                                         | 2727974-2728039 | - | 66  |
| D23580 | STM14_26031 | 378446002 | - | 2757050-2757262 | putative prophage protein                                     | 2728102-2728314 | - | 213 |
| 14028S | STM14_3167  | 378451335 | + | 2784542-2784769 | PagK-like protein                                             | 2728421-2728648 | + | 228 |
| 14028S | STM14_1473  | 378449695 | - | 1321447-1322052 | hypothetical protein                                          | 2736957-2737562 | + | 606 |
| 14028S | STM14_3202  | 378451368 | - | 2814160-2814285 | hypothetical protein                                          | 2758034-2758159 | - | 126 |
| 14028S | STM14_3227  | 378451393 | + | 2829159-2829443 | excisionase-like protein                                      | 2770726-2771010 | + | 285 |
| 14028S | STM14_3229  | 378451395 | + | 2830868-2831005 | hypothetical protein                                          | 2772435-2772572 | + | 138 |
| 14028S | STM14_3230  | 378451396 | - | 2831002-2831118 | hypothetical protein                                          | 2772569-2772685 | - | 117 |
| 14028S | STM14_3235  | 378451401 | - | 2833834-2833998 | hypothetical protein                                          | 2775401-2775565 | - | 165 |
| 14028S | STM14_3236  | 378451402 | - | 2833998-2834177 | hypothetical protein                                          | 2775565-2775744 | - | 180 |
| 14028S | STM14_3239  | 378451405 | - | 2836525-2836725 | putative methyltransferase                                    | 2778092-2778292 | - | 201 |
| 14028S | STM14_3249  | 378451415 | + | 2846371-2846505 | hypothetical protein                                          | 2787938-2788072 | + | 135 |
| 14028S | STM14_3259  | 378451420 | + | 2855709-2855837 | hypothetical protein                                          | 2797193-2797321 | + | 129 |
| 14028S | STM14_3260  | 378451421 | + | 2855915-2856031 | hypothetical protein                                          | 2797399-2797515 | + | 117 |
| 14028S | STM14_3272  | 378451432 | + | 2866577-2866735 | hypothetical protein                                          | 2836226-2836384 | + | 159 |
| 14028S | STM14_3273  | 378451433 | - | 2866637-2866750 | hypothetical protein                                          | 2836286-2836399 | - | 114 |
| 14028S | STM14_3280  | 378451440 | - | 2870862-2871008 | hypothetical protein                                          | 2840511-2840657 | - | 147 |
| 14028S | STM14_3282  | 378451442 | + | 2872506-2872700 | putative cytochrome c-type biogenesis protein (heme exporter) | 2842155-2842349 | + | 195 |
| UK1    | STMUK_2717  | 378990059 | - | 2824344-2824538 | putative cytoplasmic protein                                  | 2845740-2845934 | - | 195 |
| 14028S | STM14_3291  | 378451450 | - | 2879362-2879469 | hypothetical protein                                          | 2849011-2849118 | - | 108 |
| 14028S | STM14_3295  | 378451454 | + | 2881056-2881160 | hypothetical protein                                          | 2850705-2850809 | + | 105 |
| 14028S | STM14_3296  | 378451455 | - | 2881388-2881540 | hypothetical protein                                          | 2851037-2851189 | - | 153 |
| ST474  | STM474_2816 | 379701937 | + | 2855546-2855689 | hypothetical protein                                          | 2867924-2868067 | + | 144 |
| 14028S | STM14_3309  | 378451467 | + | 2905915-2906040 | hypothetical protein                                          | 2909256-2909381 | + | 126 |
| 14028S | STM14_3312  | 378451470 | - | 2908421-2908582 | hypothetical protein                                          | 2911762-2911923 | - | 162 |
| 14028S | STM14_3324  | 378451481 | - | 2917712-2917867 | hypothetical protein                                          | 2921053-2921208 | - | 156 |
| 14028S | STM14_3326  | 378451483 | - | 2919626-2919739 | hypothetical protein                                          | 2922967-2923080 | - | 114 |
| ST474  | STM474_2898 | 379702018 | - | 2927700-2927858 | hypothetical protein                                          | 2928700-2928858 | - | 159 |
| 14028S | STM14_3340  | 378451496 | + | 2935806-2935976 | hypothetical protein                                          | 2939137-2939307 | + | 171 |
| 14028S | STM14_3341  | 378451497 | - | 2936002-2936229 | hypothetical protein                                          | 2939333-2939560 | - | 228 |
| 14028S | STM14_3342  | 378451498 | - | 2936297-2936449 | hypothetical protein                                          | 2939628-2939780 | - | 153 |
| 14028S | STM14_3343  | 378451499 | + | 2936325-2936507 | hypothetical protein                                          | 2939656-2939838 | + | 183 |
| D23580 | STM14_27451 | 378446140 | - | 2919280-2919612 | putative inner membrane protein                               | 2949861-2950193 | - | 333 |
| 14028S | STM14_3351  | 378451506 | + | 2948161-2948499 | hypothetical protein                                          | 2951492-2951830 | + | 339 |
| 14028S | STM14_3353  | 378451508 | + | 2949636-2949833 | hypothetical protein                                          | 2952967-2953164 | + | 198 |
| 14028S | STM14_3355  | 378451510 | - | 2950805-2950957 | hypothetical protein                                          | 2954136-2954288 | - | 153 |
| 14028S | STM14_3356  | 378451511 | + | 2951059-2951226 | hypothetical protein                                          | 2954390-2954557 | + | 168 |
| 14028S | STM14_3364  | 378451519 | + | 2957937-2958050 | hypothetical protein                                          | 2961268-2961381 | + | 114 |
| 14028S | STM14_3372  | 378451527 | + | 2965822-2965938 | hypothetical protein                                          | 2969153-2969269 | + | 117 |
| 14028S | STM14_3378  | 378451533 | + | 2968220-2968345 | hypothetical protein                                          | 2971551-2971676 | + | 126 |
| 14028S | STM14_3379  | 378451534 | + | 2968355-2968534 | hypothetical protein                                          | 2971686-2971865 | + | 180 |
| 14028S | STM14_3382  | 378451537 | - | 2969378-2969494 | hypothetical protein                                          | 2972709-2972825 | - | 117 |
| 14028S | STM14_3386  | 378451541 | + | 2971817-2971993 | hypothetical protein                                          | 2975148-2975324 | + | 177 |
| 14028S | STM14_3394  | 378451549 | + | 2979522-2979632 | hypothetical protein                                          | 2982853-2982963 | + | 111 |
| 14028S | STM14_3396  | 378451551 | - | 2981060-2981167 | hypothetical protein                                          | 2984391-2984498 | - | 108 |
| 14028S | STM14_3398  | 378451553 | - | 2981900-2982022 | hypothetical protein                                          | 2985231-2985353 | - | 123 |
| 14028S | STM14_3411  | 378451561 | + | 2991063-2991173 | hypothetical protein                                          | 2994255-2994365 | + | 111 |
| 14028S | STM14_3414  | 378451564 | + | 2994186-2994350 | hypothetical protein                                          | 2997378-2997542 | + | 165 |
| 14028S | STM14_3415  | 378451565 | + | 2994269-2994475 | hypothetical protein                                          | 2997461-2997667 | - | 207 |
| 14028S | STM14_3419  | 378451569 | + | 2996927-2997172 | hypothetical protein                                          | 3000119-3000364 | + | 246 |
| 14028S | STM14_3421  | 378451571 | + | 2998326-2998466 | hypothetical protein                                          | 3001518-3001658 | + | 141 |
| 14028S | STM14_3427  | 378451577 | - | 3001727-3001867 | hypothetical protein                                          | 3004919-3005059 | - | 141 |
| 14028S | STM14_3433  | 378451583 | - | 3007751-3007963 | hydrogenase maturation protein                                | 3010943-3011155 | - | 213 |
| 14028S | STM14_3435  | 378451585 | - | 3010214-3010348 | hypothetical protein                                          | 3013406-3013540 | - | 135 |
| 14028S | STM14_3437  | 378451587 | - | 3010872-3011006 | hypothetical protein                                          | 3014064-3014198 | - | 135 |
| 14028S | STM14_3447  | 378451597 | - | 3019238-3019342 | hypothetical protein                                          | 3022430-3022534 | - | 105 |
| 14028S | STM14_3449  | 378451599 | + | 3019869-3020072 | hypothetical protein                                          | 3023061-3023264 | + | 204 |
| 14028S | STM14_3457  | 378451607 | + | 3026426-3026551 | hypothetical protein                                          | 3029618-3029743 | + | 126 |
| 14028S | STM14_3464  | 378451614 | + | 3032212-3032319 | hypothetical protein                                          | 3035405-3035512 | + | 108 |
| 14028S | STM14_3466  | 378451616 | - | 3033296-3033403 | hypothetical protein                                          | 3036489-3036596 | - | 108 |
| 14028S | STM14_3502  | 378451652 | - | 3066393-3066497 | hypothetical protein                                          | 3069586-3069690 | - | 105 |
| D23580 | STM14_28661 | 378446261 | + | 3039872-3039979 | pathogenicity island 1 protein                                | 3070314-3070421 | + | 108 |
| 14028S | STM14_3504  | 378451654 | - | 3067340-3067483 | hypothetical protein                                          | 3070533-3070676 | - | 144 |
| 14028S | STM14_3508  | 378451657 | + | 3068687-3068806 | hypothetical protein                                          | 3071880-3071999 | + | 120 |
| 14028S | STM14_3510  | 378451659 | - | 3069836-3070357 | putative cytoplasmic protein                                  | 3073029-3073550 | - | 522 |
| 14028S | STM14_3528  | 378451677 | + | 3087981-3088118 | hypothetical protein                                          | 3091174-3091311 | + | 138 |
| 14028S | STM14_3535  | 378451684 | - | 3092010-3092120 | hypothetical protein                                          | 3095203-3095313 | - | 111 |
| 14028S | STM14_3549  | 378451698 | - | 3106978-3107112 | hypothetical protein                                          | 3110048-3110182 | - | 135 |
| ST474  | STM474_3093 | 379702206 | + | 3116333-3116446 | hypothetical protein                                          | 3117567-3117680 | + | 114 |
| ST474  | STM474_3094 | 379702207 | - | 3117516-3117629 | hypothetical protein                                          | 3118933-3119046 | - | 114 |
| 14028S | STM14_3560  | 378451709 | + | 3121321-3121458 | hypothetical protein                                          | 3124757-3124894 | + | 138 |



|        |             |           |   |                 |                                  |                 |   |     |
|--------|-------------|-----------|---|-----------------|----------------------------------|-----------------|---|-----|
| 140285 | STM14_3561  | 378451710 | + | 3121826-3121978 | putative fibrin subunit          | 3125262-3125414 | + | 153 |
| 140285 | STM14_3571  | 378451720 | + | 3134509-3134736 | hypothetical protein             | 3137945-3138172 | + | 228 |
| 140285 | STM14_3579  | 378451727 | + | 3140022-3140165 | hypothetical protein             | 3143458-3143601 | + | 144 |
| 140285 | STM14_3580  | 378451728 | + | 3140255-3140359 | hypothetical protein             | 3143691-3143795 | + | 105 |
| 140285 | STM14_3583  | 378451731 | - | 3143293-3143478 | hypothetical protein             | 3146729-3146914 | - | 186 |
| 140285 | STM14_3585  | 378451733 | - | 3144205-3144342 | L-1,2-propanediol oxidoreductase | 3147641-3147778 | - | 138 |
| 140285 | STM14_3588  | 378451736 | - | 3146280-3146447 | hypothetical protein             | 3149716-3149883 | - | 168 |
| 140285 | STM14_3600  | 378451747 | + | 3157563-3157685 | hypothetical protein             | 3160999-3161121 | + | 123 |
| 140285 | STM14_3616  | 378451761 | + | 3177651-3177833 | hypothetical protein             | 3181087-3181269 | + | 183 |
| 140285 | STM14_3619  | 378451764 | - | 3179499-3179657 | hypothetical protein             | 3182935-3183093 | - | 159 |
| 140285 | STM14_3622  | 378451767 | - | 3182548-3182661 | hypothetical protein             | 3185984-3186097 | - | 114 |
| 140285 | STM14_3623  | 378451768 | + | 3182641-3182757 | hypothetical protein             | 3186077-3186193 | + | 117 |
| 140285 | STM14_3624  | 378451769 | - | 3182858-3183004 | hypothetical protein             | 3186294-3186440 | - | 147 |
| 140285 | STM14_3625  | 378451770 | + | 3183029-3183154 | hypothetical protein             | 3186465-3186590 | + | 126 |
| 140285 | STM14_3626  | 378451771 | - | 3183053-3183160 | hypothetical protein             | 3186489-3186596 | - | 108 |
| 140285 | STM14_3628  | 378451773 | + | 3183985-3184095 | hypothetical protein             | 3187421-3187531 | + | 111 |
| 140285 | STM14_3631  | 378451776 | + | 3185172-3185342 | hypothetical protein             | 3188860-3188778 | + | 171 |
| D23580 | STMMW_29721 | 378446366 | - | 3162322-3162468 | hypothetical protein             | 3193557-3193703 | - | 147 |
| 140285 | STM14_3635  | 378451780 | - | 3190309-3190434 | hypothetical protein             | 3193745-3193870 | - | 126 |
| 140285 | STM14_3642  | 378451787 | - | 3197131-3197247 | hypothetical protein             | 3200567-3200683 | - | 117 |
| 140285 | STM14_3645  | 378451790 | - | 3199028-3199198 | hypothetical protein             | 3202464-3202634 | - | 171 |
| 140285 | STM14_3649  | 378451794 | + | 3202193-3202315 | hypothetical protein             | 3205629-3205751 | + | 123 |
| 140285 | STM14_3658  | 378451803 | + | 3210549-3210968 | hypothetical protein             | 3213961-3214380 | + | 420 |
| 140285 | STM14_3662  | 378451807 | - | 3213534-3213719 | hypothetical protein             | 3216946-3217131 | - | 186 |
| 140285 | STM14_3666  | 378451810 | - | 3215425-3215670 | hypothetical protein             | 3219549-3219794 | - | 246 |
| 140285 | STM14_3670  | 378451813 | + | 3217519-3217686 | hypothetical protein             | 3221643-3221810 | + | 168 |
| 140285 | STM14_3686  | 378451829 | - | 3230904-3231050 | immunoglobulin VH domain protein | 3235028-3235174 | - | 147 |
| 140285 | STM14_3690  | 378451833 | + | 3235813-3235968 | hypothetical protein             | 3239937-3240092 | + | 156 |
| 140285 | STM14_3691  | 378451834 | + | 3236175-3236279 | hypothetical protein             | 3240299-3240403 | + | 105 |
| 140285 | STM14_3693  | 378451836 | + | 3237457-3237624 | hypothetical protein             | 3241581-3241748 | + | 168 |
| 140285 | STM14_3700  | 378451843 | + | 3243685-3243795 | hypothetical protein             | 3247809-3247919 | + | 111 |
| 140285 | STM14_3702  | 378451845 | + | 3244595-3244732 | hypothetical protein             | 3248719-3248856 | + | 138 |
| 140285 | STM14_3704  | 378451847 | + | 3245634-3245885 | hypothetical protein             | 3249758-3250009 | + | 252 |
| 140285 | STM14_3711  | 378451854 | + | 3252233-3252433 | hypothetical protein             | 3256357-3256557 | + | 201 |
| 140285 | STM14_3718  | 378451861 | + | 3257540-3257698 | hypothetical protein             | 3261664-3261822 | + | 159 |
| 140285 | STM14_3722  | 378451865 | + | 3260720-3260824 | hypothetical protein             | 3264844-3264948 | + | 105 |
| UK1    | STMUK_3076  | 378990408 | + | 3217903-3218067 | putative cytoplasmic protein     | 3274440-3274604 | + | 165 |
| 140285 | STM14_3734  | 378451876 | - | 3271996-3272121 | hypothetical protein             | 3276138-3276263 | - | 126 |
| 140285 | STM14_3751  | 378451893 | - | 3285668-3285820 | hypothetical protein             | 3289810-3289962 | - | 153 |
| 140285 | STM14_3757  | 378451899 | - | 3289138-3289263 | hypothetical protein             | 3293280-3293405 | - | 126 |
| 140285 | STM14_3759  | 378451901 | - | 3290425-3290550 | hypothetical protein             | 3294567-3294692 | - | 126 |
| 140285 | STM14_3762  | 378451903 | - | 3293235-3293459 | hypothetical protein             | 3298246-3298470 | - | 225 |
| 140285 | STM14_3773  | 378451913 | - | 3301831-3301965 | hypothetical protein             | 3306842-3306976 | - | 135 |
| 140285 | STM14_3774  | 378451914 | + | 3302110-3302214 | hypothetical protein             | 3307121-3307225 | + | 105 |
| 140285 | STM14_3779  | 378451919 | - | 3305240-3305395 | putative cytoplasmic protein     | 3310251-3310406 | - | 156 |
| 140285 | STM14_3783  | 378451923 | + | 3308724-3308864 | hypothetical protein             | 3313735-3313875 | + | 141 |
| 140285 | STM14_3786  | 378451926 | + | 3310018-3310173 | hypothetical protein             | 3315029-3315184 | + | 156 |
| 140285 | STM14_3789  | 378451928 | + | 3312290-3312427 | hypothetical protein             | 3317303-3317440 | + | 138 |
| 140285 | STM14_3790  | 378451929 | - | 3312496-3312606 | hypothetical protein             | 3317509-3317619 | - | 111 |
| 140285 | STM14_3792  | 378451931 | + | 3314050-3314181 | hypothetical protein             | 3319063-3319194 | + | 132 |
| 140285 | STM14_3793  | 378451932 | - | 3314188-3314334 | hypothetical protein             | 3319201-3319347 | - | 147 |
| 140285 | STM14_3794  | 378451933 | + | 3314216-3314410 | hypothetical protein             | 3319229-3319423 | + | 195 |
| 140285 | STM14_3798  | 378451937 | + | 3318584-3318703 | hypothetical protein             | 3323597-3323716 | + | 120 |
| 140285 | STM14_3800  | 378451939 | - | 3319990-3320106 | hypothetical protein             | 3325003-3325119 | - | 117 |
| 140285 | STM14_3801  | 378451940 | + | 3320290-3320487 | hypothetical protein             | 3325303-3325500 | + | 198 |
| 140285 | STM14_3803  | 378451942 | - | 3322464-3322571 | hypothetical protein             | 3327477-3327584 | - | 108 |
| ST474  | STM474_3301 | 379702409 | - | 3334473-3334658 | hypothetical protein             | 3337034-3337219 | - | 186 |
| 140285 | STM14_3815  | 378451954 | + | 3332051-3332179 | hypothetical protein             | 3337064-3337192 | + | 129 |
| 140285 | STM14_0363  | 378448623 | - | 352120-352227   | hypothetical protein             | 3340187-3340294 | + | 108 |
| 140285 | STM14_3830  | 378451969 | + | 3342234-3342434 | hypothetical protein             | 3347247-3347447 | + | 201 |
| 140285 | STM14_3833  | 378451972 | - | 3344492-3344629 | hypothetical protein             | 3349505-3349642 | - | 138 |
| 140285 | STM14_3834  | 378451973 | + | 3344530-3344640 | hypothetical protein             | 3349543-3349653 | + | 111 |
| ST474  | STM474_3318 | 379702426 | - | 3348584-3348700 | hypothetical protein             | 3351144-3351260 | - | 117 |
| 140285 | STM14_3837  | 378451976 | + | 3346625-3346789 | hypothetical protein             | 3351637-3351801 | + | 165 |
| 140285 | STM14_3840  | 378451979 | - | 3349441-3349545 | hypothetical protein             | 3354453-3354557 | - | 105 |
| 140285 | STM14_3851  | 378451990 | + | 3361049-3361165 | hypothetical protein             | 3366061-3366177 | + | 117 |
| ST474  | STM474_3334 | 379702442 | - | 3364546-3364662 | hypothetical protein             | 3367106-3367222 | - | 117 |
| 140285 | STM14_3860  | 378451999 | + | 3368291-3368398 | hypothetical protein             | 3373303-3373410 | + | 108 |
| 140285 | STM14_3872  | 378452011 | - | 3377873-3378022 | hypothetical protein             | 3382884-3383033 | - | 150 |
| 140285 | STM14_3875  | 378452014 | + | 3380454-3380651 | hypothetical protein             | 3385465-3385662 | + | 198 |
| 140285 | STM14_3895  | 378452033 | + | 3402540-3402695 | hypothetical protein             | 3407551-3407706 | + | 156 |
| 140285 | STM14_3901  | 378452039 | - | 3408358-3408459 | hypothetical protein             | 3413369-3413470 | - | 102 |
| 140285 | STM14_3904  | 378452042 | + | 3410298-3410435 | hypothetical protein             | 3415309-3415446 | + | 138 |
| 140285 | STM14_3907  | 378452045 | - | 3412994-3413194 | hypothetical protein             | 3418005-3418205 | - | 201 |
| ST474  | STM474_3403 | 379702507 | + | 3435178-3435297 | hypothetical protein             | 3437737-3437856 | + | 120 |
| D23580 | STMMW_32461 | 378446633 | + | 3437229-3437615 | hypothetical protein             | 3438069-3438455 | + | 387 |
| 140285 | STM14_3932  | 378452069 | - | 3436508-3436648 | hypothetical protein             | 3441519-3441659 | - | 141 |
| 140285 | STM14_3933  | 378452070 | + | 3436575-3436694 | hypothetical protein             | 3441586-3441705 | + | 120 |
| 140285 | STM14_3934  | 378452071 | + | 3436648-3436776 | hypothetical protein             | 3441659-3441787 | + | 129 |
| 140285 | STM14_3938  | 378452075 | + | 3440518-3440661 | hypothetical protein             | 3445529-3445672 | + | 144 |
| 140285 | STM14_3965  | 378452100 | - | 3464611-3464718 | hypothetical protein             | 3474691-3474798 | - | 108 |
| 140285 | STM14_3996  | 378452128 | - | 3490436-3490546 | hypothetical protein             | 3499804-3499914 | - | 111 |
| 140285 | STM14_4018  | 378452150 | - | 3508092-3508241 | hypothetical protein             | 3517460-3517609 | - | 150 |
| 140285 | STM14_4019  | 378452151 | - | 3508281-3508475 | hypothetical protein             | 3517649-3517843 | - | 195 |
| 140285 | STM14_4023  | 378452155 | + | 3515633-3515794 | hypothetical protein             | 3525001-3525162 | + | 162 |
| 140285 | STM14_4034  | 378452166 | + | 3525086-3525205 | hypothetical protein             | 3534454-3534573 | + | 120 |
| 140285 | STM14_4051  | 378452183 | - | 3540466-3540597 | malate dehydrogenase             | 3549831-3549962 | - | 132 |
| 140285 | STM14_4053  | 378452185 | + | 3541795-3541923 | hypothetical protein             | 3551160-3551288 | + | 129 |
| ST474  | STM474_3527 | 379702628 | - | 3554690-3554815 | hypothetical protein             | 3556534-3556659 | - | 126 |
| 140285 | STM14_4069  | 378452201 | + | 3558566-3558757 | hypothetical protein             | 3567931-3568122 | + | 192 |
| 140285 | STM14_4074  | 378452206 | - | 3563669-3563851 | hypothetical protein             | 3573034-3573216 | - | 183 |
| 140285 | STM14_4075  | 378452207 | + | 3563867-3563971 | hypothetical protein             | 3573232-3573336 | + | 105 |
| 140285 | STM14_4081  | 378452213 | - | 3568595-3568738 | hypothetical protein             | 3577960-3578103 | - | 144 |

|        |             |           |   |                 |                                      |                 |   |     |
|--------|-------------|-----------|---|-----------------|--------------------------------------|-----------------|---|-----|
| 140285 | STM14_4088  | 378452220 | - | 3574592-3574753 | hypothetical protein                 | 3583957-3584118 | - | 162 |
| 140285 | STM14_4089  | 378452221 | + | 3574662-3574820 | hypothetical protein                 | 3584027-3584185 | + | 159 |
| 140285 | STM14_4093  | 378452225 | + | 3579746-3579922 | hypothetical protein                 | 3589111-3589287 | + | 177 |
| 140285 | STM14_4094  | 378452226 | - | 3580182-3580316 | hypothetical protein                 | 3589547-3589681 | - | 135 |
| 140285 | STM14_4095  | 378452227 | + | 3580370-3580480 | hypothetical protein                 | 3589735-3589845 | + | 111 |
| 140285 | STM14_4148  | 378452275 | - | 3611988-3612179 | elongation factor Tu                 | 3621394-3621585 | - | 192 |
| ST474  | STM474_3611 | 379702705 | + | 3620933-3621070 | hypothetical protein                 | 3622715-3622852 | + | 138 |
| 140285 | STM14_4163  | 378452290 | + | 3623551-3623655 | hypothetical protein                 | 3632957-3633061 | + | 105 |
| 140285 | STM14_4167  | 378452293 | + | 3626355-3626480 | hypothetical protein                 | 3635761-3635886 | + | 126 |
| 140285 | STM14_4180  | 378452306 | + | 3635785-3635937 | hypothetical protein                 | 3645191-3645343 | + | 153 |
| 140285 | STM14_4182  | 378452308 | - | 3637245-3637421 | hypothetical protein                 | 3646651-3646827 | - | 177 |
| 140285 | STM14_4185  | 378452311 | - | 3640241-3640396 | hypothetical protein                 | 3649647-3649802 | - | 156 |
| 140285 | STM14_4192  | 378452318 | - | 3649991-3650131 | hypothetical protein                 | 3659361-3659501 | - | 141 |
| 140285 | STM14_4207  | 378452333 | - | 3663870-3663983 | hypothetical protein                 | 3673240-3673353 | - | 114 |
| 140285 | STM14_4213  | 378452339 | - | 3670273-3670407 | hypothetical protein                 | 3679643-3679777 | - | 135 |
| 140285 | STM14_4214  | 378452340 | + | 3670342-3670449 | hypothetical protein                 | 3679712-3679819 | + | 108 |
| 140285 | STM14_4220  | 378452346 | + | 3677538-3677768 | hypothetical protein                 | 3686908-3687138 | + | 231 |
| 140285 | STM14_4224  | 378452350 | + | 3680653-3680766 | hypothetical protein                 | 3690023-3690136 | + | 114 |
| 140285 | STM14_4229  | 378452355 | - | 3684140-3684289 | hypothetical protein                 | 3693510-3693659 | - | 150 |
| 140285 | STM14_4233  | 378452359 | - | 3690393-3690500 | hypothetical protein                 | 3699763-3699870 | - | 108 |
| 140285 | STM14_4240  | 378452366 | - | 3698369-3698491 | hypothetical protein                 | 3707939-3708061 | - | 123 |
| 140285 | STM14_4243  | 378452369 | - | 3700901-3701017 | hypothetical protein                 | 3710471-3710587 | - | 117 |
| 140285 | STM14_4259  | 378452384 | - | 3722125-3722298 | hypothetical protein                 | 3731695-3731868 | - | 174 |
| 140285 | STM14_4261  | 378452386 | + | 3723463-3723627 | hypothetical protein                 | 3733033-3733197 | + | 165 |
| 140285 | STM14_4263  | 378452387 | + | 3723698-3723940 | putative inner membrane protein      | 3733268-3733510 | + | 243 |
| 140285 | STM14_4269  | 378452393 | + | 3728906-3729031 | hypothetical protein                 | 3738476-3738601 | + | 126 |
| 140285 | STM14_4270  | 378452394 | + | 3729191-3729319 | hypothetical protein                 | 3738761-3738889 | + | 129 |
| 140285 | STM14_4277  | 378452401 | + | 3735927-3736031 | hypothetical protein                 | 3745498-3745602 | + | 105 |
| 140285 | STM14_4291  | 378452415 | - | 3747318-3747434 | hypothetical protein                 | 3756889-3757005 | - | 117 |
| 140285 | STM14_4293  | 378452417 | + | 3747983-3748117 | putative cytoplasmic protein         | 3757554-3757688 | + | 135 |
| 140285 | STM14_4296  | 378452420 | + | 3750462-3750605 | hypothetical protein                 | 3760033-3760176 | + | 144 |
| 140285 | STM14_4316  | 378452440 | + | 3770553-3770684 | hypothetical protein                 | 3780124-3780255 | + | 132 |
| 140285 | STM14_4325  | 378452449 | + | 3781138-3781305 | hypothetical protein                 | 3790706-3790873 | + | 168 |
| 140285 | STM14_4333  | 378452457 | + | 3789092-3789217 | hypothetical protein                 | 3798287-3798412 | + | 126 |
| 140285 | STM14_4336  | 378452460 | - | 3792675-3792815 | hypothetical protein                 | 3801870-3802010 | - | 141 |
| 140285 | STM14_4339  | 378452463 | - | 3794036-3794179 | hypothetical protein                 | 3803231-3803374 | - | 144 |
| 140285 | STM14_4340  | 378452464 | + | 3794140-3794265 | hypothetical protein                 | 3803335-3803460 | + | 126 |
| 140285 | STM14_4343  | 378452467 | + | 3796527-3796667 | hypothetical protein                 | 3805722-3805862 | + | 141 |
| 140285 | STM14_4347  | 378452471 | - | 3801111-3801227 | hypothetical protein                 | 3810306-3810422 | - | 117 |
| 140285 | STM14_4350  | 378452474 | + | 3803739-3803876 | hypothetical protein                 | 3812934-3813071 | + | 138 |
| 140285 | STM14_4352  | 378452476 | - | 3805315-3805461 | hypothetical protein                 | 3814510-3814656 | - | 147 |
| 140285 | STM14_4354  | 378452478 | - | 3807400-3807591 | hypothetical protein                 | 3816595-3816786 | - | 192 |
| 140285 | STM14_4361  | 378452485 | + | 3818231-3818344 | hypothetical protein                 | 3827426-3827539 | + | 114 |
| 140285 | STM14_4366  | 378452489 | - | 3822083-3822277 | hypothetical protein                 | 3831278-3831472 | - | 195 |
| 140285 | STM14_4374  | 378452497 | - | 3827982-3828101 | hypothetical protein                 | 3837177-3837296 | - | 120 |
| 140285 | STM14_4379  | 378452502 | + | 3832815-3832976 | hypothetical protein                 | 3842010-3842171 | + | 162 |
| 140285 | STM14_4388  | 378452509 | + | 3842019-3842180 | hypothetical protein                 | 3851224-3851385 | + | 162 |
| 140285 | STM14_4393  | 378452514 | + | 3846344-3846445 | hypothetical protein                 | 3855549-3855650 | + | 102 |
| 140285 | STM14_4395  | 378452516 | - | 3847245-3847379 | hypothetical protein                 | 3856450-3856584 | - | 135 |
| 140285 | STM14_4403  | 378452524 | - | 3852193-3852324 | hypothetical protein                 | 3861398-3861529 | - | 132 |
| 140285 | STM14_4408  | 378452528 | + | 3856473-3856610 | hypothetical protein                 | 3865678-3865815 | + | 138 |
| 140285 | STM14_4410  | 378452530 | - | 3856798-3857019 | hypothetical protein                 | 3866003-3866224 | - | 222 |
| 140285 | STM14_4415  | 378452535 | + | 3861460-3861693 | hypothetical protein                 | 3870665-3870898 | + | 234 |
| 140285 | STM14_4416  | 378452536 | - | 3861562-3861738 | hypothetical protein                 | 3870767-3870943 | - | 177 |
| 140285 | STM14_4419  | 378452539 | + | 3863890-3864222 | hypothetical protein                 | 3873095-3873427 | + | 333 |
| 140285 | STM14_4424  | 378452544 | - | 3869165-3869311 | hypothetical protein                 | 3878370-3878516 | - | 147 |
| 140285 | STM14_4437  | 378452557 | + | 3881551-3881694 | hypothetical protein                 | 3890756-3890899 | + | 144 |
| 140285 | STM14_4448  | 378452568 | + | 3893735-3893932 | hypothetical protein                 | 3902940-3903137 | + | 198 |
| ST474  | STM474_3868 | 379702957 | + | 3911348-3911467 | hypothetical protein                 | 3912928-3913047 | - | 120 |
| 140285 | STM14_4456  | 378452576 | + | 3904878-3905129 | hypothetical protein                 | 3914082-3914333 | + | 252 |
| 140285 | STM14_4485  | 378452605 | - | 3932731-3932850 | hypothetical protein                 | 3941935-3942054 | - | 120 |
| 140285 | STM14_4497  | 378452617 | + | 3941019-3941198 | hypothetical protein                 | 3950223-3950402 | + | 180 |
| 140285 | STM14_4501  | 378452621 | + | 3943928-3944110 | hypothetical protein                 | 3953132-3953314 | + | 183 |
| 140285 | STM14_4504  | 378452624 | + | 3946552-3946725 | hypothetical protein                 | 3955756-3955929 | + | 174 |
| 140285 | STM14_4512  | 378452632 | - | 3954806-3954916 | hypothetical protein                 | 3964010-3964120 | - | 111 |
| 140285 | STM14_4518  | 378452637 | + | 3962472-3962597 | hypothetical protein                 | 3971676-3971801 | + | 126 |
| 140285 | STM14_4520  | 378452639 | + | 3963213-3963356 | hypothetical protein                 | 3972417-3972560 | + | 144 |
| 140285 | STM14_4521  | 378452640 | - | 3963387-3963497 | hypothetical protein                 | 3972591-3972701 | - | 111 |
| D23580 | STM14_37491 | 378447126 | - | 3981984-3982097 | putative product                     | 3982004-3982117 | - | 114 |
| 140285 | STM14_4531  | 378452648 | + | 3973351-3973476 | hypothetical protein                 | 3982555-3982680 | + | 126 |
| 140285 | STM14_3040  | 378451209 | + | 2640806-2640913 | hypothetical protein                 | 3983456-3983563 | - | 108 |
| 140285 | STM14_4535  | 378452652 | + | 3974935-3975075 | hypothetical protein                 | 3984139-3984279 | + | 141 |
| 140285 | STM14_4537  | 378452654 | + | 3978059-3978172 | hypothetical protein                 | 3987263-3987376 | + | 114 |
| 140285 | STM14_4539  | 378452656 | + | 3979055-3979171 | hypothetical protein                 | 3988259-3988375 | + | 117 |
| 140285 | STM14_4540  | 378452657 | - | 3979172-3979297 | hypothetical protein                 | 3988376-3988501 | - | 126 |
| 140285 | STM14_4549  | 378452666 | + | 3986024-3986146 | hypothetical protein                 | 3995228-3995350 | + | 123 |
| 140285 | STM14_4551  | 378452668 | - | 3989051-3989164 | hypothetical protein                 | 3998255-3998368 | - | 114 |
| 140285 | STM14_4553  | 378452670 | + | 3989514-3989657 | hypothetical protein                 | 3998718-3998861 | + | 144 |
| 140285 | STM14_4565  | 378452682 | - | 3999123-3999230 | hypothetical protein                 | 4090542-4090649 | - | 108 |
| 140285 | STM14_4567  | 378452684 | - | 3999764-3999871 | hypothetical protein                 | 4091183-4091290 | - | 108 |
| 140285 | STM14_4578  | 378452695 | + | 4011296-4011472 | hypothetical protein                 | 4102715-4102891 | + | 177 |
| 140285 | ivbL        | 378452696 | - | 4011404-4011502 | ivb operon leader peptide            | 4102823-4102921 | - | 99  |
| 140285 | STM14_4580  | 378452697 | + | 4011519-4011680 | hypothetical protein                 | 4102938-4103099 | + | 162 |
| 140285 | STM14_4581  | 378452698 | - | 4011613-4011768 | hypothetical protein                 | 4103032-4103187 | - | 156 |
| 140285 | STM14_4582  | 378452699 | + | 4011777-4011950 | hypothetical protein                 | 4103196-4103369 | + | 174 |
| D23580 | STM14_37861 | 378447163 | + | 4021208-4021303 | hypothetical protein                 | 4103444-4103539 | + | 96  |
| D23580 | STM14_37871 | 378447164 | + | 4021319-4021408 | putative LexA-regulated protein TisB | 4103555-4103644 | + | 90  |
| 140285 | STM14_4589  | 378452704 | - | 4016572-4016697 | hypothetical protein                 | 4107991-4108116 | - | 126 |
| 140285 | STM14_4595  | 378452710 | + | 4020774-4020887 | hypothetical protein                 | 4112193-4112306 | + | 114 |
| ST474  | STM474_3981 | 379703066 | + | 4028417-4028551 | hypothetical protein                 | 4112214-4112348 | - | 135 |
| 140285 | STM14_4598  | 378452712 | + | 4022921-4023073 | hypothetical protein                 | 4114340-4114492 | + | 153 |
| 140285 | STM14_4601  | 378452715 | + | 4024130-4024306 | hypothetical protein                 | 4115549-4115725 | + | 177 |
| ST474  | STM474_3986 | 379703070 | - | 4031907-4032026 | hypothetical protein                 | 4115704-4115823 | - | 120 |

|        |             |           |   |                 |                              |                 |   |     |
|--------|-------------|-----------|---|-----------------|------------------------------|-----------------|---|-----|
| 140285 | STM14_4630  | 378452743 | + | 4056093-4056239 | hypothetical protein         | 4147512-4147658 | + | 147 |
| 140285 | STM14_4633  | 378452746 | + | 4059079-4059237 | hypothetical protein         | 4150498-4150656 | + | 159 |
| 140285 | rpmH        | 378452747 | + | 4059378-4059518 | SOS ribosomal protein L34    | 4150797-4150937 | + | 141 |
| ST474  | STM474_4022 | 379703106 | - | 4071364-4071624 | hypothetical protein         | 4155161-4155421 | - | 261 |
| 140285 | STM14_4658  | 378452770 | + | 4086316-4086504 | hypothetical protein         | 4177735-4177923 | + | 189 |
| 140285 | STM14_4669  | 378452781 | - | 4094364-4094507 | hypothetical protein         | 4185783-4185926 | - | 144 |
| 140285 | ihvL        | 378452802 | + | 4122426-4122524 | ihvG operon leader peptide   | 4213847-4213945 | + | 99  |
| 140285 | STM14_4733  | 378452833 | + | 4155257-4155382 | hypothetical protein         | 4246678-4246803 | + | 126 |
| 140285 | STM14_4738  | 378452838 | - | 4159908-4160012 | hypothetical protein         | 4251329-4251433 | - | 105 |
| 140285 | STM14_4740  | 378452840 | + | 4162570-4162710 | hypothetical protein         | 4253991-4254131 | + | 141 |
| 140285 | STM14_4743  | 378452843 | + | 4163805-4164167 | putative cytoplasmic protein | 4255226-4255588 | + | 363 |
| 140285 | STM14_4753  | 378452852 | - | 4171444-4171629 | hypothetical protein         | 4262865-4263050 | - | 186 |
| 140285 | STM14_4759  | 378452858 | - | 4175211-4175348 | hypothetical protein         | 4266632-4266769 | - | 138 |
| 140285 | STM14_4768  | 378452867 | + | 4183187-4183360 | hypothetical protein         | 4274608-4274781 | + | 174 |
| ST474  | STM474_4144 | 379703214 | + | 4193636-4193764 | hypothetical protein         | 4277202-4277330 | + | 129 |
| 140285 | STM14_4771  | 378452870 | + | 4185906-4186052 | hypothetical protein         | 4277327-4277473 | + | 147 |
| 140285 | STM14_4784  | 378452883 | + | 4197098-4197223 | hypothetical protein         | 4288519-4288644 | + | 126 |
| 140285 | STM14_4800  | 378452894 | - | 4215049-4215231 | hypothetical protein         | 4306575-4306757 | - | 183 |
| 140285 | STM14_4801  | 378452895 | + | 4215077-4215433 | hypothetical protein         | 4306603-4306959 | + | 357 |
| 140285 | STM14_4808  | 378452902 | - | 4219525-4219656 | hypothetical protein         | 4311051-4311182 | - | 132 |
| 140285 | STM14_4811  | 378452904 | + | 4222708-4222851 | hypothetical protein         | 4314234-4314377 | + | 144 |
| 140285 | STM14_4816  | 378452909 | - | 4226121-4226246 | hypothetical protein         | 4317647-4317772 | - | 126 |
| 140285 | STM14_4819  | 378452912 | - | 4228860-4229039 | hypothetical protein         | 4320386-4320565 | - | 180 |
| 140285 | STM14_4821  | 378452914 | - | 4230571-4230990 | putative cytoplasmic protein | 4322097-4322516 | - | 420 |
| 140285 | STM14_4837  | 378452930 | - | 4248232-4248351 | hypothetical protein         | 4339737-4339856 | - | 120 |
| 140285 | STM14_4854  | 378452947 | - | 4262409-4262654 | hypothetical protein         | 4353914-4354069 | - | 156 |
| 140285 | STM14_4856  | 378452949 | + | 4263770-4263904 | hypothetical protein         | 4355275-4355409 | + | 135 |
| 140285 | STM14_4858  | 378452951 | + | 4265002-4265130 | hypothetical protein         | 4356507-4356635 | + | 129 |
| 140285 | STM14_4867  | 378452960 | + | 4272347-4272496 | hypothetical protein         | 4363852-4364001 | + | 150 |
| 140285 | STM14_4868  | 378452961 | - | 4272426-4272560 | hypothetical protein         | 4363931-4364065 | - | 135 |
| 140285 | STM14_4872  | 378452965 | + | 4275521-4275652 | hypothetical protein         | 4367026-4367157 | + | 132 |
| ST474  | STM474_4231 | 379703295 | + | 4283542-4283655 | hypothetical protein         | 4367192-4367305 | + | 114 |
| 140285 | STM14_4886  | 378452979 | - | 4286951-4287055 | hypothetical protein         | 4378456-4378560 | - | 105 |
| 140285 | STM14_4898  | 378452991 | - | 4296957-4297091 | hypothetical protein         | 4388461-4388595 | - | 135 |
| 140285 | STM14_4909  | 378453002 | - | 4305795-4305962 | hypothetical protein         | 4397299-4397466 | - | 168 |
| 140285 | STM14_4914  | 378453007 | + | 4310547-4310666 | hypothetical protein         | 4402051-4402170 | + | 120 |
| 140285 | STM14_4916  | 378453009 | - | 4311024-4311164 | hypothetical protein         | 4402528-4402668 | - | 141 |
| 140285 | STM14_4934  | 378453027 | - | 4332008-4332127 | hypothetical protein         | 4423512-4423631 | - | 120 |
| 140285 | STM14_4938  | 378453031 | + | 4336017-4336178 | hypothetical protein         | 4427521-4427682 | + | 162 |
| 140285 | STM14_4943  | 378453035 | - | 4340772-4340927 | hypothetical protein         | 4432276-4432431 | - | 156 |
| 140285 | STM14_4950  | 378453042 | + | 4346732-4346872 | hypothetical protein         | 4438236-4438376 | + | 141 |
| 140285 | STM14_4951  | 378453043 | + | 4346784-4346900 | hypothetical protein         | 4438288-4438404 | + | 117 |
| 140285 | STM14_4953  | 378453045 | + | 4348703-4348810 | hypothetical protein         | 4440207-4440314 | + | 108 |
| 140285 | STM14_4961  | 378453053 | - | 4358974-4359162 | hypothetical protein         | 4450478-4450666 | - | 189 |
| 140285 | STM14_0296  | 378448563 | + | 291760-291876   | hypothetical protein         | 4458102-4458218 | + | 117 |
| 140285 | STM14_4977  | 378453063 | + | 4373434-4373607 | putative cytoplasmic protein | 4464940-4465113 | - | 174 |
| 140285 | STM14_4983  | 378453065 | + | 4375382-4375510 | hypothetical protein         | 4466888-4467016 | + | 129 |
| 140285 | STM14_4995  | 378453077 | + | 4388644-4388847 | hypothetical protein         | 4480150-4480353 | + | 204 |
| 140285 | STM14_4997  | 378453079 | + | 4389931-4390140 | hypothetical protein         | 4481437-4481646 | + | 210 |
| 140285 | STM14_5018  | 378453099 | + | 4407683-4407805 | hypothetical protein         | 4499189-4499311 | + | 123 |
| 140285 | STM14_5019  | 378453100 | - | 4407796-4407918 | hypothetical protein         | 4499302-4499424 | - | 123 |
| 140285 | STM14_5020  | 378453101 | + | 4407851-4407991 | hypothetical protein         | 4499357-4499497 | + | 141 |
| 140285 | STM14_0291  | 378448561 | - | 289581-289703   | hypothetical protein         | 4499464-4499586 | - | 123 |
| 140285 | STM14_5025  | 378453102 | - | 4413499-4413630 | hypothetical protein         | 4505064-4505177 | - | 132 |
| 140285 | STM14_5026  | 378453103 | + | 4413565-4413795 | hypothetical protein         | 4505112-4505342 | + | 231 |
| 140285 | STM14_5031  | 378453108 | + | 4418519-4418641 | hypothetical protein         | 4510066-4510188 | + | 123 |
| 140285 | STM14_5038  | 378453115 | + | 4428296-4428397 | putative cytoplasmic protein | 4519843-4519944 | + | 102 |
| 140285 | STM14_5044  | 378453120 | + | 4431313-4431468 | hypothetical protein         | 4522860-4523015 | + | 156 |
| 140285 | STM14_5057  | 378453133 | - | 4441014-4441139 | hypothetical protein         | 4532561-4532686 | - | 126 |
| 140285 | STM14_5072  | 378453147 | + | 4451435-4451575 | hypothetical protein         | 4542982-4543122 | + | 141 |
| 140285 | STM14_5083  | 378453158 | + | 4462681-4462857 | hypothetical protein         | 4554228-4554404 | - | 177 |
| 140285 | STM14_5084  | 378453159 | + | 4462737-4462877 | hypothetical protein         | 4554284-4554424 | + | 141 |
| 140285 | STM14_5088  | 378453163 | + | 4466972-4467136 | hypothetical protein         | 4558519-4558683 | + | 165 |
| 140285 | STM14_5101  | 378453176 | + | 4478537-4478704 | hypothetical protein         | 4570084-4570251 | + | 168 |
| 140285 | STM14_5113  | 378453188 | + | 4489545-4489661 | putative cytoplasmic protein | 4581092-4581208 | + | 117 |
| 140285 | STM14_5115  | 378453190 | - | 4490374-4490565 | hypothetical protein         | 4581921-4582112 | - | 192 |
| 140285 | STM14_5116  | 378453191 | + | 4490568-4490723 | hypothetical protein         | 4582115-4582270 | + | 156 |
| ST474  | STM474_4451 | 379703497 | + | 4498500-4498640 | hypothetical protein         | 4582296-4582436 | + | 141 |
| 140285 | STM14_5124  | 378453199 | + | 4515420-4515557 | hypothetical protein         | 4606967-4607104 | + | 138 |
| 140285 | STM14_5125  | 378453200 | - | 4515741-4515845 | hypothetical protein         | 4607288-4607392 | - | 105 |
| 140285 | STM14_5129  | 378453204 | - | 4518503-4518631 | hypothetical protein         | 4610050-4610178 | - | 129 |
| 140285 | STM14_5131  | 378453206 | - | 4519322-4519456 | hypothetical protein         | 4610869-4611003 | - | 135 |
| 140285 | STM14_5132  | 378453207 | - | 4519489-4519611 | hypothetical protein         | 4611036-4611158 | - | 123 |
| 140285 | STM14_5142  | 378453217 | + | 4529401-4529547 | putative cytoplasmic protein | 4620948-4621094 | + | 147 |
| 140285 | STM14_5149  | 378453224 | - | 4536353-4536481 | hypothetical protein         | 4627888-4628016 | - | 129 |
| 140285 | STM14_5150  | 378453225 | + | 4536377-4536649 | hypothetical protein         | 4627912-4628184 | + | 273 |
| 140285 | STM14_5152  | 378453227 | + | 4537849-4538022 | hypothetical protein         | 4629384-4629557 | + | 174 |
| 140285 | STM14_5154  | 378453229 | - | 4538728-4538883 | hypothetical protein         | 4630263-4630418 | - | 156 |
| 140285 | STM14_5160  | 378453235 | + | 4544189-4544284 | hypothetical protein         | 4635724-4635819 | + | 96  |
| 140285 | STM14_5175  | 378453250 | - | 4562136-4562402 | putative cytoplasmic protein | 4645988-4646254 | - | 267 |
| 140285 | STM14_5183  | 378453258 | + | 4571436-4571549 | hypothetical protein         | 4655288-4655401 | + | 114 |
| 140285 | STM14_5190  | 378453265 | - | 4574852-4575073 | putative cytoplasmic protein | 4659416-4659637 | - | 222 |
| SL1344 | SL1344_4256 | 378702162 | - | 4584964-4585098 | hypothetical protein         | 4661778-4661912 | - | 135 |
| ST474  | STM474_4515 | 379703561 | - | 4585588-4585743 | hypothetical protein         | 4662401-4662556 | - | 156 |
| ST474  | STM474_4516 | 379703562 | - | 4586025-4586150 | hypothetical protein         | 4662837-4662962 | - | 126 |
| 140285 | STM14_5196  | 378453271 | - | 4579152-4579388 | hypothetical protein         | 4663715-4663951 | - | 237 |
| 140285 | STM14_5203  | 378453277 | - | 4585245-4585367 | hypothetical protein         | 4669808-4669930 | - | 123 |
| 140285 | STM14_5208  | 378453282 | - | 4589666-4589833 | hypothetical protein         | 4674229-4674396 | - | 168 |
| 140285 | STM14_5211  | 378453285 | + | 4591089-4591223 | hypothetical protein         | 4675652-4675786 | + | 135 |
| 140285 | STM14_5212  | 378453286 | - | 4591232-4591378 | hypothetical protein         | 4675795-4675941 | - | 147 |
| 140285 | STM14_5225  | 378453299 | + | 4599983-4600087 | hypothetical protein         | 4684546-4684650 | + | 105 |
| 140285 | STM14_5272  | 378453343 | - | 4642797-4642994 | hypothetical protein         | 4727360-4727557 | - | 198 |
| 140285 | STM14_5273  | 378453344 | + | 4642921-4643028 | hypothetical protein         | 4727484-4727591 | + | 108 |

|        |             |           |   |                 |                                 |                 |   |     |
|--------|-------------|-----------|---|-----------------|---------------------------------|-----------------|---|-----|
| 14028S | STM14_5274  | 378453345 | + | 4643067-4643273 | putative cytoplasmic protein    | 4727630-4727836 | + | 207 |
| 14028S | STM14_5288  | 378453359 | - | 4654346-4654567 | hypothetical protein            | 4738909-4739130 | - | 222 |
| 14028S | STM14_5291  | 378453362 | - | 4655902-4656081 | hypothetical protein            | 4740465-4740644 | - | 180 |
| 14028S | STM14_5295  | 378453366 | + | 4658725-4658841 | hypothetical protein            | 4743274-4743390 | + | 117 |
| 14028S | STM14_5303  | 378453374 | - | 4669323-4669508 | hypothetical protein            | 4753872-4754057 | - | 186 |
| 14028S | STM14_5306  | 378453377 | + | 4671075-4671302 | hypothetical protein            | 4755624-4755851 | + | 228 |
| ST474  | STM474_4616 | 379703657 | + | 4681690-4681806 | hypothetical protein            | 4758487-4758603 | + | 117 |
| 14028S | STM14_5313  | 378453384 | - | 4678291-4678593 | putative cytoplasmic protein    | 4762840-4763142 | - | 303 |
| 14028S | STM14_5315  | 378453386 | + | 4679544-4679654 | hypothetical protein            | 4764093-4764203 | + | 111 |
| ST474  | STM474_4627 | 379703668 | - | 4695124-4695237 | hypothetical protein            | 4771922-4772035 | - | 114 |
| 14028S | STM14_5323  | 378453393 | + | 4689572-4689691 | hypothetical protein            | 4774121-4774240 | + | 120 |
| 14028S | STM14_5344  | 378453414 | + | 4707729-4707899 | hypothetical protein            | 4792278-4792448 | + | 171 |
| 14028S | STM14_5347  | 378453416 | + | 4711078-4711185 | hypothetical protein            | 4795627-4795734 | + | 108 |
| ST474  | STM474_4653 | 379703693 | + | 4719860-4719991 | hypothetical protein            | 4796658-4796789 | + | 132 |
| UK1    | STMUK_4448  | 378991724 | + | 4665460-4665600 | putative cytoplasmic protein    | 4802404-4802544 | + | 141 |
| 14028S | STM14_5356  | 378453425 | - | 4718450-4718566 | hypothetical protein            | 4802999-4803115 | - | 117 |
| 14028S | STM14_5359  | 378453428 | - | 4721103-4721225 | hypothetical protein            | 4805652-4805774 | - | 123 |
| 14028S | STM14_5362  | 378453431 | + | 4723479-4723670 | hypothetical protein            | 4808028-4808219 | + | 192 |
| 14028S | STM14_5367  | 378453436 | - | 4727023-4727145 | hypothetical protein            | 4811572-4811694 | - | 123 |
| 14028S | STM14_5374  | 378453443 | - | 4734836-4734955 | putative cytoplasmic protein    | 4819385-4819504 | - | 120 |
| 14028S | STM14_5381  | 378453450 | + | 4741810-4741944 | hypothetical protein            | 4826359-4826493 | + | 135 |
| 14028S | STM14_5399  | 378453466 | + | 4766523-4766714 | hypothetical protein            | 4851072-4851263 | + | 192 |
| 14028S | STM14_5402  | 378453469 | - | 4768806-4769102 | hypothetical protein            | 4853355-4853651 | - | 297 |
| 14028S | STM14_5406  | 378453473 | + | 4772201-4772314 | hypothetical protein            | 4856750-4856863 | + | 114 |
| 14028S | STM14_5407  | 378453474 | - | 4772241-4772357 | hypothetical protein            | 4856790-4856906 | - | 117 |
| 14028S | STM14_5410  | 378453477 | + | 4773638-4773850 | hypothetical protein            | 4858187-4858399 | + | 213 |
| 14028S | STM14_5413  | 378453480 | + | 4775969-4776121 | hypothetical protein            | 4860518-4860670 | + | 153 |
| 14028S | STM14_5415  | 378453482 | + | 4776954-4777076 | hypothetical protein            | 4861503-4861625 | + | 123 |
| 14028S | STM14_5416  | 378453483 | - | 4776976-4777107 | hypothetical protein            | 4861525-4861656 | - | 132 |
| 14028S | STM14_5426  | 378453493 | - | 4786173-4786316 | hypothetical protein            | 4870722-4870865 | - | 144 |
| 14028S | STM14_5427  | 378453494 | + | 4786386-4786523 | hypothetical protein            | 4870935-4871072 | + | 138 |
| ST474  | STM474_4722 | 379703761 | - | 4794952-4795101 | hypothetical protein            | 4871750-4871899 | - | 150 |
| 14028S | STM14_5431  | 378453498 | - | 4788756-4788899 | putative cytoplasmic protein    | 4873305-4873448 | - | 144 |
| 14028S | STM14_5435  | 378453502 | - | 4790281-4790412 | hypothetical protein            | 4874830-4874961 | - | 132 |
| 14028S | STM14_5440  | 378453507 | + | 4798305-4798442 | hypothetical protein            | 4882854-4882991 | + | 138 |
| 14028S | STM14_5447  | 378453514 | - | 4804689-4804838 | hypothetical protein            | 4889238-4889387 | - | 150 |
| 14028S | STM14_5455  | 378453522 | + | 4812431-4812535 | hypothetical protein            | 4896980-4897084 | + | 105 |
| 14028S | STM14_5462  | 378453529 | - | 4818419-4818574 | hypothetical protein            | 4902968-4903123 | - | 156 |
| 14028S | STM14_5468  | 378453535 | + | 4823006-4823134 | hypothetical protein            | 4907555-4907683 | + | 129 |
| 14028S | STM14_5474  | 378453538 | + | 4824998-4825105 | hypothetical protein            | 4909547-4909654 | + | 108 |
| 14028S | STM14_5479  | 378453543 | + | 4828502-4828636 | hypothetical protein            | 4913051-4913185 | + | 135 |
| 14028S | STM14_5486  | 378453550 | + | 4833992-4834120 | hypothetical protein            | 4918541-4918669 | + | 129 |
| 14028S | STM14_5496  | 378453560 | + | 4843995-4844144 | hypothetical protein            | 4928544-4928693 | + | 150 |
| ST474  | smp         | 379703819 | + | 4853656-4853805 | phosphoserine phosphatase       | 4930457-4930606 | + | 150 |
| 14028S | vjjy        | 378453584 | + | 4869015-4869155 | putative inner membrane protein | 4953564-4953704 | + | 141 |

| Reference details |                |           |        |               |                                          | Gene annotated in UK1 |        |             |
|-------------------|----------------|-----------|--------|---------------|------------------------------------------|-----------------------|--------|-------------|
| Genome name       | Gene Name      | GI        | Strand | CDS-region    | Product                                  | Coordinate            | Strand | Length (bp) |
| 14028S            | STM14_0012     | 378448286 | +      | 11257-11424   | hypothetical protein                     | 11258-11425           | +      | 168         |
| 14028S            | STM14_0015     | 378448289 | +      | 14845-14958   | hypothetical protein                     | 14846-14959           | +      | 114         |
| 14028S            | STM14_0020     | 378448294 | -      | 17613-17741   | hypothetical protein                     | 17614-17742           | -      | 129         |
| 14028S            | STM14_0021     | 378448295 | +      | 17665-17787   | hypothetical protein                     | 17666-17788           | +      | 123         |
| 14028S            | STM14_0024     | 378448298 | +      | 23091-23240   | hypothetical protein                     | 23092-23241           | +      | 150         |
| 14028S            | STM14_0026     | 378448300 | -      | 24094-24198   | hypothetical protein                     | 24095-24199           | -      | 105         |
| 14028S            | STM14_0027     | 378448301 | +      | 24316-24426   | hypothetical protein                     | 24317-24427           | +      | 111         |
| 14028S            | STM14_0040     | 378448314 | +      | 34828-34974   | hypothetical protein                     | 34829-34975           | +      | 147         |
| 14028S            | STM14_0057     | 378448331 | +      | 57203-57334   | hypothetical protein                     | 57204-57335           | +      | 132         |
| 14028S            | STM14_0068     | 378448342 | -      | 68513-68671   | hypothetical protein                     | 68514-68672           | -      | 159         |
| 14028S            | STM14_0089     | 378448363 | +      | 89119-89328   | hypothetical protein                     | 88409-88618           | +      | 210         |
| ST474             | STM474_0083    | 379699298 | -      | 92031-92228   | hypothetical protein                     | 92030-92227           | -      | 198         |
| 14028S            | STM14_0097     | 378448371 | -      | 95263-95379   | hypothetical protein                     | 94553-94669           | -      | 117         |
| 14028S            | STM14_0102     | 378448376 | +      | 98738-99019   | hypothetical protein                     | 98028-98309           | +      | 282         |
| 14028S            | STM14_0105     | 378448379 | -      | 101349-101474 | hypothetical protein                     | 100639-100764         | -      | 126         |
| 14028S            | STM14_0113     | 378448387 | -      | 108892-109053 | hypothetical protein                     | 108182-108343         | -      | 162         |
| 14028S            | STM14_0128     | 378448402 | -      | 127427-127546 | putative lipoprotein                     | 126717-126836         | -      | 120         |
| 14028S            | STM14_0130     | 378448404 | -      | 129166-129492 | hypothetical protein                     | 128456-128782         | -      | 327         |
| ST474             | STM474_0115    | 379699330 | +      | 128926-129039 | hypothetical protein                     | 128925-129038         | +      | 114         |
| 14028S            | STM14_0136     | 378448410 | -      | 134689-134793 | hypothetical protein                     | 133979-134083         | -      | 105         |
| 14028S            | STM14_0137     | 378448411 | +      | 135067-135210 | hypothetical protein                     | 134357-134500         | +      | 144         |
| 14028S            | STM14_0141     | 378448415 | -      | 138755-138877 | hypothetical protein                     | 138045-138167         | -      | 123         |
| LT2               | STM04630       | 409994397 | -      | 139338-139487 | hypothetical protein                     | 139340-139489         | -      | 150         |
| 14028S            | STM14_0143     | 378448417 | -      | 140204-140338 | hypothetical protein                     | 139494-139628         | -      | 135         |
| 14028S            | STM14_0144     | 378448418 | +      | 140496-140633 | hypothetical protein                     | 139786-139923         | +      | 138         |
| 14028S            | STM14_0165     | 378448438 | +      | 162875-162979 | LysR family transcriptional regulator    | 162165-162269         | +      | 105         |
| 14028S            | STM14_0173     | 378448446 | -      | 168890-169072 | hypothetical protein                     | 168180-168362         | -      | 183         |
| 14028S            | STM14_0179     | 378448452 | -      | 173962-174090 | hypothetical protein                     | 173252-173380         | -      | 129         |
| 14028S            | STM14_0181     | 378448454 | +      | 175672-175794 | hypothetical protein                     | 174962-175084         | +      | 123         |
| 14028S            | STM14_0186     | 378448459 | +      | 183222-183350 | hypothetical protein                     | 182512-182640         | +      | 129         |
| 14028S            | STM14_0210     | 378448482 | -      | 209796-209966 | hypothetical protein                     | 209086-209256         | -      | 171         |
| 14028S            | STM14_0215     | 378448487 | -      | 213058-213171 | hypothetical protein                     | 212348-212461         | -      | 114         |
| 14028S            | STM14_0224     | 378448496 | +      | 221426-221587 | hypothetical protein                     | 220716-220877         | +      | 162         |
| 14028S            | STM14_0225     | 378448497 | -      | 221522-221629 | hypothetical protein                     | 220812-220919         | -      | 108         |
| 14028S            | STM14_0227     | 378448499 | -      | 224289-224429 | hypothetical protein                     | 223579-223719         | -      | 141         |
| 14028S            | STM14_0232     | 378448504 | +      | 230459-230665 | hypothetical protein                     | 229749-229955         | +      | 207         |
| 14028S            | STM14_0233     | 378448505 | +      | 231001-231144 | hypothetical protein                     | 230291-230434         | +      | 144         |
| 14028S            | STM14_0242     | 378448514 | +      | 239222-239365 | hypothetical protein                     | 238511-238654         | +      | 144         |
| 14028S            | STM14_0256     | 378448527 | +      | 254799-255083 | 30S ribosomal protein S2                 | 254087-254371         | +      | 285         |
| 14028S            | STM14_0262     | 378448533 | +      | 259830-260033 | hypothetical protein                     | 259118-259321         | +      | 204         |
| 14028S            | STM14_0291     | 378448561 | -      | 289581-289703 | hypothetical protein                     | 288869-288991         | -      | 123         |
| 14028S            | STM14_0292     | 378448562 | -      | 289616-289819 | hypothetical protein                     | 288904-289107         | -      | 204         |
| 14028S            | STM14_0296     | 378448563 | +      | 291760-291876 | hypothetical protein                     | 291048-291164         | +      | 117         |
| 14028S            | STM14_0310     | 378448574 | -      | 304859-304966 | hypothetical protein                     | 304147-304254         | -      | 108         |
| 14028S            | STM14_0312     | 378448575 | +      | 305167-305274 | hypothetical protein                     | 304456-304563         | +      | 108         |
| 14028S            | STM14_0337     | 378448600 | +      | 330303-330512 | hypothetical protein                     | 329592-329801         | +      | 210         |
| 14028S            | STM14_0343     | 378448606 | +      | 339144-339275 | hypothetical protein                     | 338433-338564         | +      | 132         |
| LT2               | STM04655       | 409994398 | -      | 339629-339871 | hypothetical protein                     | 339603-339845         | -      | 243         |
| ST474             | STM474_0312    | 379699516 | +      | 341562-341681 | hypothetical protein                     | 342058-342177         | +      | 120         |
| 14028S            | STM14_0357     | 378448617 | +      | 348560-348820 | hypothetical protein                     | 347849-348109         | +      | 261         |
| D23580            | STM04655       | 378443750 | +      | 348247-348378 | putative transposase                     | 348250-348381         | +      | 132         |
| 14028S            | STM14_0361     | 378448621 | -      | 351322-351450 | hypothetical protein                     | 350611-350739         | -      | 129         |
| 14028S            | STM14_0377     | 378448636 | -      | 366783-366935 | hypothetical protein                     | 366072-366224         | -      | 153         |
| 14028S            | STM14_0397     | 378448654 | -      | 385733-385843 | hypothetical protein                     | 385022-385132         | -      | 111         |
| 14028S            | STM14_0403     | 378448660 | -      | 390802-390939 | hypothetical protein                     | 390091-390228         | -      | 138         |
| 14028S            | STM14_0411     | 378448668 | +      | 399120-399233 | hypothetical protein                     | 398409-398522         | +      | 114         |
| 14028S            | STM14_0415     | 378448672 | +      | 402243-402422 | putative metal-binding transport protein | 401532-401711         | +      | 180         |
| 14028S            | STM14_0419     | 378448676 | +      | 409084-409218 | hypothetical protein                     | 408373-408507         | +      | 135         |
| 14028S            | STM14_0420     | 378448677 | -      | 409118-409237 | hypothetical protein                     | 408407-408526         | -      | 120         |
| 14028S            | STM14_0436     | 378448693 | +      | 425565-425684 | hypothetical protein                     | 424853-424972         | +      | 120         |
| 14028S            | STM14_0437     | 378448694 | -      | 425675-425827 | hypothetical protein                     | 424963-425115         | -      | 153         |
| 14028S            | STM14_0441     | 378448698 | -      | 430751-430909 | hypothetical protein                     | 430039-430197         | -      | 159         |
| 14028S            | STM14_0442     | 378448699 | +      | 430925-431059 | hypothetical protein                     | 430213-430347         | +      | 135         |
| 14028S            | STM14_0446     | 378448703 | +      | 433714-433827 | hypothetical protein                     | 433002-433115         | +      | 114         |
| 14028S            | STM14_0451     | 378448708 | +      | 437620-437742 | hypothetical protein                     | 436908-437030         | +      | 123         |
| 14028S            | STM14_0453     | 378448710 | -      | 438082-438243 | hypothetical protein                     | 437370-437531         | -      | 162         |
| 14028S            | STM14_0457     | 378448714 | +      | 440792-440941 | hypothetical protein                     | 440080-440229         | +      | 150         |
| 14028S            | STM14_0464     | 378448721 | -      | 444556-444687 | hypothetical protein                     | 443844-443975         | -      | 132         |
| T000240           | STMDT12_C04560 | 378982997 | +      | 482933-483049 | hypothetical protein                     | 444869-444985         | +      | 117         |
| 14028S            | STM14_0469     | 378448726 | -      | 451315-451446 | hypothetical protein                     | 450603-450734         | -      | 132         |
| 14028S            | STM14_0472     | 378448729 | -      | 453755-453904 | hypothetical protein                     | 453043-453192         | -      | 150         |
| 14028S            | STM14_0479     | 378448736 | +      | 461340-461450 | DNA metabolism protein                   | 460628-460738         | +      | 111         |
| 14028S            | STM14_0487     | 378448744 | +      | 467631-467846 | hypothetical protein                     | 466919-467134         | +      | 216         |
| ST474             | STM474_0431    | 379699631 | +      | 466787-466939 | hypothetical protein                     | 467282-467434         | +      | 153         |
| 14028S            | STM14_0491     | 378448747 | +      | 469965-470111 | hypothetical protein                     | 469253-469399         | +      | 147         |
| 14028S            | STM14_0498     | 378448754 | -      | 473976-474284 | hypothetical protein                     | 473264-473572         | -      | 309         |
| 14028S            | STM14_0509     | 378448765 | -      | 484792-484902 | hypothetical protein                     | 484080-484190         | -      | 111         |
| ST474             | STM474_0464    | 379699664 | -      | 497880-498002 | hypothetical protein                     | 498375-498497         | -      | 123         |
| 14028S            | STM14_0526     | 378448781 | +      | 501468-501653 | hypothetical protein                     | 500756-500941         | +      | 186         |
| 14028S            | STM14_0528     | 378448783 | -      | 502053-502166 | hypothetical protein                     | 501341-501454         | -      | 114         |
| 14028S            | STM14_0531     | 378448786 | +      | 504670-504774 | hypothetical protein                     | 503958-504062         | +      | 105         |
| 14028S            | STM14_0536     | 378448791 | -      | 511028-511390 | hypothetical protein                     | 510316-510678         | -      | 363         |
| 14028S            | STM14_0562     | 378448816 | -      | 535085-535210 | hypothetical protein                     | 535085-535210         | -      | 126         |
| 14028S            | STM14_0573     | 378448827 | -      | 546597-546818 | hypothetical protein                     | 546597-546818         | -      | 222         |
| 14028S            | STM14_0575     | 378448829 | +      | 547392-547598 | hypothetical protein                     | 547392-547598         | +      | 207         |
| 14028S            | STM14_0580     | 378448834 | +      | 552798-552923 | hypothetical protein                     | 552798-552923         | +      | 126         |
| 14028S            | STM14_0597     | 378448851 | +      | 570227-570331 | hypothetical protein                     | 570227-570331         | +      | 105         |
| 14028S            | STM14_0599     | 378448853 | -      | 571546-571650 | hypothetical protein                     | 571546-571650         | -      | 105         |
| 14028S            | STM14_0633     | 378448887 | -      | 604316-604444 | hypothetical protein                     | 604316-604444         | -      | 129         |
| 14028S            | STM14_0634     | 378448888 | +      | 604400-604555 | hypothetical protein                     | 604400-604555         | +      | 156         |
| 14028S            | STM14_0645     | 378448899 | +      | 614019-614189 | hypothetical protein                     | 614019-614189         | +      | 171         |

|         |                |           |   |                 |                                  |                 |   |      |
|---------|----------------|-----------|---|-----------------|----------------------------------|-----------------|---|------|
| 140285  | STM14_0649     | 378448901 | + | 615283-615441   | hypothetical protein             | 615282-615440   | + | 159  |
| 140285  | STM14_0659     | 378448908 | - | 622266-622520   | hypothetical protein             | 622265-622519   | - | 255  |
| 140285  | STM14_0665     | 378448914 | + | 627603-627788   | hypothetical protein             | 627602-627787   | + | 186  |
| 140285  | STM14_0677     | 378448926 | + | 639577-639684   | hypothetical protein             | 639576-639683   | + | 108  |
| 140285  | STM14_0683     | 378448932 | - | 644504-644635   | hypothetical protein             | 644503-644634   | - | 132  |
| 140285  | STM14_0698     | 378448947 | + | 661861-661971   | hypothetical protein             | 661860-661970   | + | 111  |
| 140285  | STM14_0714     | 378448963 | + | 678228-678434   | hypothetical protein             | 678227-678433   | + | 207  |
| 140285  | STM14_0715     | 378448964 | - | 678399-678539   | hypothetical protein             | 678398-678538   | - | 141  |
| 140285  | STM14_0726     | 378448975 | + | 688331-688513   | hypothetical protein             | 688330-688512   | + | 183  |
| 140285  | STM14_0730     | 378448979 | + | 692333-692443   | hypothetical protein             | 692332-692442   | + | 111  |
| 140285  | STM14_0735     | 378448984 | + | 694969-695076   | hypothetical protein             | 694968-695075   | + | 108  |
| 140285  | STM14_0738     | 378448987 | - | 696364-696498   | hypothetical protein             | 696363-696497   | - | 135  |
| 140285  | STM14_0740     | 378448989 | - | 697584-697727   | hypothetical protein             | 697583-697726   | - | 144  |
| 140285  | STM14_0742     | 378448991 | + | 698354-698719   | hypothetical protein             | 698353-698718   | + | 366  |
| 140285  | STM14_0745     | 378448994 | + | 700128-700277   | hypothetical protein             | 700127-700276   | + | 150  |
| T000240 | STMDT12_C07050 | 378983246 | - | 742985-743125   | hypothetical protein             | 705427-705567   | - | 141  |
| 140285  | STM14_0774     | 378449022 | + | 730309-730596   | hypothetical protein             | 730308-730595   | + | 288  |
| 140285  | STM14_0777     | 378449025 | - | 733102-733251   | hypothetical protein             | 733101-733250   | - | 150  |
| 140285  | STM14_0780     | 378449028 | - | 734838-734957   | hypothetical protein             | 734837-734956   | - | 120  |
| 140285  | STM14_0791     | 378449032 | + | 739310-739477   | hypothetical protein             | 739309-739476   | + | 168  |
| 140285  | STM14_0797     | 378449038 | - | 745470-745595   | hypothetical protein             | 745469-745594   | - | 126  |
| 140285  | STM14_0800     | 378449041 | + | 749621-749734   | hypothetical protein             | 749620-749733   | + | 114  |
| 140285  | STM14_0801     | 378449042 | + | 749864-750154   | hypothetical protein             | 749863-750153   | + | 291  |
| 140285  | STM14_0809     | 378449050 | + | 757442-757591   | hypothetical protein             | 757441-757590   | + | 150  |
| 140285  | STM14_0812     | 378449053 | + | 758607-758720   | hypothetical protein             | 758606-758719   | + | 114  |
| 140285  | STM14_0819     | 378449060 | - | 766193-766318   | hypothetical protein             | 766192-766317   | - | 126  |
| 140285  | STM14_0826     | 378449067 | - | 774532-774729   | K+-transporting ATPase subunit F | 774531-774728   | - | 198  |
| T000240 | STMDT12_C07730 | 378983314 | - | 820062-820163   | hypothetical protein             | 781728-781829   | - | 102  |
| 140285  | STM14_0859     | 378449100 | + | 808472-808597   | hypothetical protein             | 808471-808596   | + | 126  |
| ST474   | STM474_0763    | 379699951 | + | 807598-807723   | hypothetical protein             | 808683-808808   | + | 126  |
| ST474   | STM474_0764    | 379699952 | - | 808597-808710   | hypothetical protein             | 809682-809795   | - | 114  |
| 140285  | STM14_0860     | 378449101 | - | 809819-809962   | hypothetical protein             | 809818-809961   | - | 144  |
| 140285  | STM14_0864     | 378449105 | + | 812877-813017   | hypothetical protein             | 812876-813016   | + | 141  |
| 140285  | STM14_0873     | 378449114 | - | 818715-819254   | hypothetical protein             | 818714-819253   | - | 540  |
| 140285  | STM14_0879     | 378449115 | - | 820227-820322   | hypothetical protein             | 820227-820322   | - | 96   |
| 140285  | STM14_0897     | 378449132 | - | 837473-837664   | hypothetical protein             | 837473-837664   | - | 192  |
| 140285  | STM14_0903     | 378449138 | + | 843123-843230   | hypothetical protein             | 843123-843230   | + | 108  |
| ST474   | STM474_0818    | 379700001 | + | 857893-858006   | hypothetical protein             | 858979-859092   | + | 114  |
| 140285  | STM14_0924     | 378449158 | + | 864209-864493   | hypothetical protein             | 864209-864493   | + | 285  |
| 140285  | STM14_0925     | 378449159 | + | 864550-864777   | hypothetical protein             | 864550-864777   | + | 228  |
| 140285  | STM14_0946     | 378449180 | - | 881747-881884   | hypothetical protein             | 881036-881173   | - | 138  |
| 140285  | STM14_0952     | 378449186 | - | 888006-888110   | hypothetical protein             | 887295-887399   | - | 105  |
| 140285  | STM14_0956     | 378449190 | + | 891948-892067   | hypothetical protein             | 891237-891356   | + | 120  |
| 140285  | STM14_0958     | 378449192 | - | 892325-892444   | hypothetical protein             | 891614-891733   | - | 120  |
| 140285  | STM14_0961     | 378449195 | + | 895674-895811   | hypothetical protein             | 894963-895100   | + | 138  |
| 140285  | STM14_0965     | 378449199 | - | 898059-898181   | hypothetical protein             | 897348-897470   | - | 123  |
| 140285  | STM14_0967     | 378449201 | - | 899158-899316   | hypothetical protein             | 898447-898605   | - | 159  |
| 140285  | STM14_0969     | 378449203 | - | 900254-900415   | hypothetical protein             | 899543-899704   | - | 162  |
| 140285  | STM14_0970     | 378449204 | - | 900375-900506   | hypothetical protein             | 899664-899795   | - | 132  |
| 140285  | STM14_0974     | 378449208 | - | 903009-903137   | hypothetical protein             | 902298-902426   | - | 129  |
| 140285  | STM14_0982     | 378449216 | + | 911396-911509   | hypothetical protein             | 910685-910798   | + | 114  |
| 140285  | STM14_0986     | 378449220 | - | 915878-916033   | hypothetical protein             | 915167-915322   | - | 156  |
| 140285  | STM14_0989     | 378449223 | + | 917997-918137   | hypothetical protein             | 917286-917426   | + | 141  |
| 140285  | STM14_0995     | 378449229 | - | 924480-924599   | hypothetical protein             | 923769-923888   | - | 120  |
| 140285  | STM14_0997     | 378449231 | + | 925933-926067   | hypothetical protein             | 925222-925356   | + | 135  |
| 140285  | STM14_0999     | 378449233 | + | 926622-926762   | hypothetical protein             | 925911-926051   | + | 141  |
| 140285  | STM14_1000     | 378449234 | + | 926970-927134   | hypothetical protein             | 926259-926423   | + | 165  |
| 140285  | STM14_1006     | 378449239 | - | 931103-931243   | hypothetical protein             | 930392-930532   | - | 141  |
| 140285  | STM14_1010     | 378449243 | + | 934780-934917   | hypothetical protein             | 934069-934206   | + | 138  |
| 140285  | STM14_1019     | 378449251 | + | 942902-943027   | hypothetical protein             | 942191-942316   | + | 126  |
| 140285  | STM14_1034     | 378449266 | + | 955378-955569   | hypothetical protein             | 954667-954858   | + | 192  |
| 140285  | STM14_1038     | 378449270 | - | 958765-958965   | hypothetical protein             | 958054-958254   | - | 201  |
| 140285  | STM14_1053     | 378449285 | + | 972908-973111   | hypothetical protein             | 972197-972400   | + | 204  |
| 140285  | STM14_1055     | 378449287 | + | 973986-974153   | hypothetical protein             | 973275-973442   | + | 168  |
| 140285  | STM14_1060     | 378449292 | - | 980013-980138   | hypothetical protein             | 979302-979427   | - | 126  |
| 140285  | STM14_1061     | 378449293 | + | 980033-980176   | hypothetical protein             | 979322-979465   | + | 144  |
| 140285  | STM14_1067     | 378449299 | - | 984062-984343   | hypothetical protein             | 983351-983632   | - | 282  |
| 140285  | STM14_1069     | 378449301 | - | 985102-985260   | hypothetical protein             | 984391-984549   | - | 159  |
| 140285  | STM14_1081     | 378449312 | - | 994689-994946   | hypothetical protein             | 993979-994236   | - | 258  |
| 140285  | STM14_1082     | 378449313 | - | 994867-995142   | hypothetical protein             | 994157-994432   | - | 276  |
| 140285  | ftsK           | 378449315 | + | 995700-999785   | DNA translocase FtsK             | 994990-999075   | + | 4086 |
| 140285  | STM14_1087     | 378449318 | + | 1001941-1002111 | hypothetical protein             | 1001231-1001401 | + | 171  |
| 140285  | STM14_1092     | 378449323 | + | 1007647-1007754 | hypothetical protein             | 1006937-1007044 | + | 108  |
| 140285  | STM14_1093     | 378449324 | - | 1007837-1007968 | hypothetical protein             | 1007127-1007258 | - | 132  |
| 140285  | STM14_1102     | 378449333 | + | 1018831-1018959 | hypothetical protein             | 1018121-1018249 | + | 129  |
| 140285  | STM14_1104     | 378449335 | + | 1019641-1019754 | hypothetical protein             | 1018931-1019044 | + | 114  |
| 140285  | STM14_1108     | 378449339 | - | 1023127-1023381 | hypothetical protein             | 1022417-1022671 | - | 255  |
| 140285  | STM14_1118     | 378449349 | - | 1033792-1033944 | hypothetical protein             | 1033082-1033234 | - | 153  |
| 140285  | STM14_1129     | 378449360 | - | 1047995-1048126 | hypothetical protein             | 1047285-1047416 | - | 132  |
| 140285  | STM14_1131     | 378449362 | + | 1049521-1049673 | hypothetical protein             | 1048811-1048963 | + | 153  |
| 140285  | STM14_1133     | 378449364 | - | 1051307-1051426 | hypothetical protein             | 1050597-1050716 | - | 120  |
| 140285  | STM14_1135     | 378449366 | - | 1051897-1052118 | hypothetical protein             | 1051187-1051408 | - | 222  |
| 140285  | STM14_1137     | 378449368 | + | 1053504-1053662 | hypothetical protein             | 1052794-1052952 | + | 159  |
| 140285  | STM14_1146     | 378449377 | - | 1062948-1063106 | hypothetical protein             | 1062238-1062396 | - | 159  |
| ST474   | STM474_0999    | 379700176 | + | 1061436-1061582 | hypothetical protein             | 1062518-1062664 | + | 147  |
| ST474   | STM474_1001    | 379700178 | + | 1061983-1062096 | hypothetical protein             | 1063065-1063178 | + | 114  |
| 140285  | STM14_1149     | 378449380 | + | 1063939-1064178 | hypothetical protein             | 1063229-1063468 | + | 240  |
| 140285  | STM14_1157     | 378449388 | + | 1068009-1068230 | hypothetical protein             | 1067299-1067520 | + | 222  |
| 140285  | STM14_1161     | 378449392 | + | 1069732-1069878 | hypothetical protein             | 1069022-1069168 | + | 147  |
| ST474   | STM474_1045    | 379700222 | + | 1098511-1098666 | hypothetical protein             | 1099824-1099979 | + | 156  |
| 140285  | STM14_1201     | 378449431 | - | 1106320-1106445 | hypothetical protein             | 1105610-1105735 | - | 126  |
| 140285  | STM14_1209     | 378449439 | - | 1115818-1116021 | hypothetical protein             | 1115109-1115312 | - | 204  |
| 140285  | STM14_1216     | 378449446 | - | 1121248-1121352 | hypothetical protein             | 1120539-1120643 | - | 105  |

|         |                |           |   |                 |                                                       |                 |   |     |
|---------|----------------|-----------|---|-----------------|-------------------------------------------------------|-----------------|---|-----|
| T000240 | STMDT12_C11030 | 378983644 | + | 1169756-1169860 | hypothetical protein                                  | 1129706-1129810 | + | 105 |
| 140285  | STM14_1234     | 378449463 | + | 1135671-1135796 | hypothetical protein                                  | 1134962-1135087 | + | 126 |
| 140285  | STM14_1244     | 378449473 | - | 1143230-1143372 | hypothetical protein                                  | 1142521-1142628 | - | 108 |
| 140285  | STM14_1245     | 378449474 | + | 1143361-1143543 | hypothetical protein                                  | 1142652-1142834 | + | 183 |
| 140285  | STM14_1249     | 378449478 | - | 1146275-1146388 | hypothetical protein                                  | 1145566-1145679 | - | 114 |
| 140285  | STM14_1254     | 378449483 | - | 1150549-1150701 | hypothetical protein                                  | 1149840-1149992 | - | 153 |
| 140285  | STM14_1260     | 378449489 | - | 1155618-1155782 | hypothetical protein                                  | 1154909-1155073 | - | 165 |
| 140285  | STM14_1262     | 378449491 | + | 1156832-1156987 | hypothetical protein                                  | 1156123-1156278 | + | 156 |
| 140285  | STM14_1265     | 378449494 | - | 1158383-1158577 | hypothetical protein                                  | 1157674-1157868 | - | 195 |
| 140285  | STM14_1273     | 378449502 | + | 1164294-1164521 | hypothetical protein                                  | 1163585-1163812 | + | 228 |
| 140285  | STM14_1279     | 378449506 | - | 1170030-1170278 | hypothetical protein                                  | 1169321-1169569 | - | 249 |
| 140285  | STM14_1280     | 378449507 | - | 1170167-1170286 | hypothetical protein                                  | 1169458-1169577 | - | 120 |
| 140285  | STM14_1282     | 378449509 | + | 1172347-1172457 | hypothetical protein                                  | 1171638-1171748 | + | 111 |
| 140285  | STM14_1283     | 378449510 | + | 1172451-1172747 | hypothetical protein                                  | 1171742-1172038 | + | 297 |
| 140285  | STM14_1286     | 378449512 | + | 1174679-1174783 | hypothetical protein                                  | 1173970-1174074 | + | 105 |
| 140285  | STM14_1288     | 378449514 | + | 1176314-1176421 | hypothetical protein                                  | 1175605-1175712 | + | 108 |
| 140285  | STM14_1289     | 378449515 | - | 1176396-1176605 | hypothetical protein                                  | 1175687-1175896 | - | 210 |
| 140285  | STM14_1291     | 378449517 | - | 1177413-1177520 | hypothetical protein                                  | 1176704-1176811 | - | 108 |
| 140285  | STM14_1292     | 378449518 | + | 1177573-1177704 | hypothetical protein                                  | 1176864-1176995 | + | 132 |
| 140285  | STM14_1298     | 378449523 | - | 1183064-1183228 | hypothetical protein                                  | 1182355-1182519 | - | 165 |
| 140285  | STM14_1307     | 378449532 | - | 1188559-1188696 | hypothetical protein                                  | 1187850-1187987 | - | 138 |
| 140285  | STM14_1308     | 378449533 | - | 1188894-1189040 | hypothetical protein                                  | 1188185-1188331 | - | 147 |
| 140285  | STM14_1316     | 378449541 | - | 1194339-1194509 | hypothetical protein                                  | 1193630-1193800 | - | 171 |
| 140285  | STM14_1322     | 378449547 | + | 1200601-1201062 | hypothetical protein                                  | 1199892-1200353 | + | 462 |
| 140285  | STM14_1327     | 378449552 | + | 1204177-1204380 | hypothetical protein                                  | 1203468-1203671 | + | 204 |
| 140285  | STM14_1339     | 378449564 | - | 1212983-1213159 | hypothetical protein                                  | 1212274-1212450 | - | 177 |
| 140285  | STM14_1344     | 378449569 | - | 1216241-1216396 | flagellar basal body P-ring biosynthesis protein FlgA | 1215532-1215687 | - | 156 |
| 140285  | STM14_1356     | 378449581 | - | 1226280-1226474 | hypothetical protein                                  | 1225571-1225765 | - | 195 |
| 140285  | STM14_1376     | 378449600 | - | 1244261-1244398 | hypothetical protein                                  | 1243552-1243689 | - | 138 |
| 140285  | STM14_1390     | 378449614 | - | 1256910-1257065 | hypothetical protein                                  | 1256201-1256356 | - | 156 |
| 140285  | STM14_1399     | 378449623 | - | 1267794-1267916 | hypothetical protein                                  | 1267085-1267207 | - | 123 |
| 140285  | STM14_1401     | 378449625 | - | 1269076-1269240 | hypothetical protein                                  | 1268367-1268531 | - | 165 |
| 140285  | STM14_1487     | 378449708 | - | 1337214-1337372 | hypothetical protein                                  | 1285404-1285562 | - | 159 |
| 140285  | STM14_1488     | 378449709 | + | 1337312-1337452 | hypothetical protein                                  | 1285502-1285642 | + | 141 |
| 140285  | STM14_1489     | 378449710 | + | 1337337-1337585 | hypothetical protein                                  | 1285527-1285775 | + | 249 |
| 140285  | STM14_1494     | 378449714 | - | 1340405-1340575 | hypothetical protein                                  | 1288595-1288765 | - | 171 |
| 140285  | STM14_1496     | 378449716 | - | 1341060-1341188 | hypothetical protein                                  | 1289250-1289378 | - | 129 |
| 140285  | STM14_1499     | 378449718 | + | 1341718-1341825 | hypothetical protein                                  | 1289908-1290015 | + | 108 |
| 140285  | STM14_1500     | 378449719 | - | 1342043-1342192 | hypothetical protein                                  | 1290233-1290382 | - | 150 |
| 140285  | STM14_1502     | 378449721 | - | 1342962-1343096 | hypothetical protein                                  | 1291152-1291286 | - | 135 |
| 140285  | STM14_1506     | 378449723 | - | 1344493-1344636 | hypothetical protein                                  | 1292683-1292826 | - | 144 |
| 140285  | STM14_1507     | 378449724 | + | 1344742-1344867 | putative lipoprotein                                  | 1292932-1293057 | + | 126 |
| ST474   | STM474_1249    | 379700419 | - | 1291877-1292050 | hypothetical protein                                  | 1293189-1293362 | - | 174 |
| 140285  | STM14_1510     | 378449727 | - | 1346067-1346216 | putative inner membrane protein                       | 1294257-1294406 | - | 150 |
| 140285  | STM14_1514     | 378449731 | - | 1348508-1348666 | hypothetical protein                                  | 1296698-1296856 | - | 159 |
| 140285  | STM14_1524     | 378449740 | - | 1356451-1356600 | hypothetical protein                                  | 1304641-1304790 | - | 150 |
| 140285  | STM14_1528     | 378449744 | + | 1358977-1359201 | hypothetical protein                                  | 1307167-1307391 | + | 225 |
| 140285  | STM14_1533     | 378449749 | - | 1361225-1361380 | hypothetical protein                                  | 1309415-1309570 | - | 156 |
| 140285  | STM14_1536     | 378449752 | - | 1362034-1362159 | hypothetical protein                                  | 1310224-1310349 | - | 126 |
| 140285  | STM14_1538     | 378449754 | + | 1362921-1363106 | hypothetical protein                                  | 1311111-1311296 | + | 186 |
| 140285  | STM14_1540     | 378449756 | - | 1363413-1363529 | hypothetical protein                                  | 1311603-1311719 | - | 117 |
| 140285  | STM14_1541     | 378449757 | - | 1363501-1363599 | hypothetical protein                                  | 1311691-1311789 | - | 99  |
| 140285  | STM14_1545     | 378449761 | - | 1364743-1364856 | hypothetical protein                                  | 1312933-1313046 | - | 114 |
| 140285  | STM14_1546     | 378449762 | + | 1364774-1364911 | hypothetical protein                                  | 1312964-1313101 | + | 138 |
| 140285  | STM14_1550     | 378449766 | + | 1367385-1367522 | hypothetical protein                                  | 1315575-1315712 | + | 138 |
| 140285  | STM14_1554     | 378449770 | + | 1370048-1370245 | hypothetical protein                                  | 1318238-1318435 | + | 198 |
| 140285  | STM14_1555     | 378449771 | + | 1370136-1370267 | salivary secreted protein                             | 1318326-1318457 | + | 132 |
| 140285  | STM14_1557     | 378449773 | + | 1371682-1371801 | hypothetical protein                                  | 1319872-1319991 | + | 120 |
| ST474   | STM474_1289    | 379700457 | + | 1320526-1320669 | hypothetical protein                                  | 1321839-1321982 | + | 144 |
| 140285  | STM14_1559     | 378449775 | - | 1373854-1374027 | hypothetical protein                                  | 1322043-1322216 | - | 174 |
| 140285  | STM14_1564     | 378449780 | - | 1378335-1378511 | hypothetical protein                                  | 1326524-1326700 | - | 177 |
| 140285  | STM14_1566     | 378449782 | + | 1379655-1379795 | hypothetical protein                                  | 1327844-1327984 | + | 141 |
| 140285  | STM14_1569     | 378449785 | + | 1380898-1381002 | hypothetical protein                                  | 1329088-1329192 | + | 105 |
| 140285  | STM14_1572     | 378449788 | + | 1382785-1382889 | hypothetical protein                                  | 1330975-1331079 | + | 105 |
| 140285  | STM14_1581     | 378449797 | + | 1391859-1392038 | hypothetical protein                                  | 1340049-1340228 | + | 180 |
| 140285  | STM14_1587     | 378449803 | + | 1398234-1398449 | hypothetical protein                                  | 1346424-1346639 | + | 216 |
| ST474   | STM474_1315    | 379700483 | + | 1347752-1347886 | hypothetical protein                                  | 1349065-1349199 | + | 135 |
| 140285  | STM14_1591     | 378449807 | - | 1400923-1401129 | hypothetical protein                                  | 1349113-1349319 | - | 207 |
| 140285  | STM14_1593     | 378449809 | + | 1401610-1401732 | hypothetical protein                                  | 1349800-1349922 | + | 123 |
| 140285  | STM14_1601     | 378449817 | + | 1409372-1409509 | hypothetical protein                                  | 1357562-1357699 | + | 138 |
| 140285  | STM14_1602     | 378449818 | - | 1409399-1409647 | hypothetical protein                                  | 1357589-1357837 | - | 249 |
| 140285  | STM14_1617     | 378449833 | + | 1421769-1421954 | hypothetical protein                                  | 1369959-1370144 | + | 186 |
| 140285  | STM14_1618     | 378449834 | + | 1421956-1422090 | hypothetical protein                                  | 1370146-1370280 | + | 135 |
| 140285  | STM14_1623     | 378449839 | - | 1425398-1425562 | hypothetical protein                                  | 1373588-1373752 | - | 165 |
| 140285  | STM14_1631     | 378449847 | - | 1432577-1432696 | hypothetical protein                                  | 1380767-1380886 | - | 120 |
| 140285  | STM14_1636     | 378449852 | + | 1436467-1436571 | hypothetical protein                                  | 1384657-1384761 | + | 105 |
| ST474   | STM474_1353    | 379700521 | + | 1384122-1384307 | hypothetical protein                                  | 1385435-1385620 | + | 186 |
| 140285  | STM14_1638     | 378449854 | - | 1437586-1437699 | hypothetical protein                                  | 1385776-1385889 | - | 114 |
| 140285  | STM14_1645     | 378449861 | - | 1445506-1445658 | hypothetical protein                                  | 1393696-1393848 | - | 153 |
| 140285  | STM14_1652     | 378449868 | + | 1452598-1452744 | hypothetical protein                                  | 1400788-1400934 | + | 147 |
| 140285  | STM14_1653     | 378449869 | - | 1452728-1452838 | hypothetical protein                                  | 1400918-1401028 | - | 111 |
| 140285  | STM14_1658     | 378449873 | - | 1456308-1456475 | hypothetical protein                                  | 1404499-1404666 | - | 168 |
| ST474   | STM474_1383    | 379700550 | + | 1418471-1418587 | hypothetical protein                                  | 1419786-1419902 | - | 117 |
| ST474   | STM474_1395    | 379700562 | + | 1431868-1432002 | hypothetical protein                                  | 1433183-1433317 | + | 135 |
| 140285  | STM14_1685     | 378449900 | - | 1486016-1486129 | hypothetical protein                                  | 1434207-1434320 | - | 114 |
| 140285  | STM14_1692     | 378449907 | + | 1493410-1493517 | hypothetical protein                                  | 1441601-1441708 | + | 108 |
| 140285  | STM14_1719     | 378449934 | + | 1511477-1511602 | hypothetical protein                                  | 1459668-1459793 | + | 126 |
| 140285  | STM14_1728     | 378449941 | + | 1519171-1519452 | hypothetical protein                                  | 1467362-1467643 | + | 282 |
| 140285  | STM14_1751     | 378449964 | + | 1538110-1538277 | hypothetical protein                                  | 1486301-1486468 | + | 168 |
| 140285  | STM14_1761     | 410023179 | - | 1546024-1546179 | hypothetical protein                                  | 1494215-1494370 | - | 156 |
| 140285  | STM14_1764     | 378449977 | + | 1548438-1548683 | hypothetical protein                                  | 1496629-1496874 | + | 246 |
| 140285  | STM14_1771     | 378449982 | + | 1553745-1553906 | fumarate A                                            | 1501936-1502097 | + | 162 |
| 140285  | STM14_1776     | 378449987 | - | 1559385-1559690 | outer membrane protein                                | 1507576-1507881 | - | 306 |

|         |                |           |   |                 |                                                 |                 |   |     |
|---------|----------------|-----------|---|-----------------|-------------------------------------------------|-----------------|---|-----|
| 140285  | STM14_1782     | 378449992 | - | 1563882-1564016 | putative amino acid permease                    | 1512073-1512207 | - | 135 |
| 140285  | STM14_1783     | 378449993 | - | 1563914-1564087 | hypothetical protein                            | 1512105-1512278 | - | 174 |
| 140285  | STM14_1784     | 378449994 | + | 1564099-1564224 | hypothetical protein                            | 1512290-1512415 | + | 126 |
| 140285  | STM14_1786     | 378449996 | + | 1565234-1565359 | hypothetical protein                            | 1513425-1513550 | + | 126 |
| 140285  | STM14_1790     | 378450000 | + | 1569946-1570116 | hypothetical protein                            | 1518137-1518307 | + | 171 |
| 140285  | STM14_1794     | 378450004 | - | 1571734-1572027 | hypothetical protein                            | 1519925-1520218 | - | 294 |
| 140285  | STM14_1796     | 378450006 | - | 1572462-1572653 | hypothetical protein                            | 1520653-1520844 | - | 192 |
| T000240 | STMDT12_C14990 | 378984040 | + | 1560231-1560323 | hypothetical protein                            | 1520711-1520803 | + | 93  |
| 140285  | STM14_1810     | 378450020 | - | 1586812-1587033 | putative dimethyl sulfoxide reductase subunit A | 1535003-1535224 | - | 222 |
| 140285  | STM14_1816     | 378450026 | - | 1591641-1591757 | hypothetical protein                            | 1539832-1539948 | - | 117 |
| ST474   | STM474_1518    | 379700677 | - | 1542834-1542947 | hypothetical protein                            | 1544149-1544262 | - | 114 |
| 140285  | STM14_1827     | 378450036 | - | 1601704-1601919 | hypothetical protein                            | 1549895-1550110 | - | 216 |
| 140285  | STM14_1828     | 378450037 | + | 1601786-1601923 | peptidyl-dipeptidase dcp                        | 1549977-1550114 | + | 138 |
| 140285  | STM14_1831     | 378450040 | - | 1602970-1603068 | hypothetical protein                            | 1551161-1551259 | - | 99  |
| 140285  | STM14_1833     | 378450042 | - | 1603865-1604014 | hypothetical protein                            | 1552056-1552205 | - | 150 |
| 140285  | STM14_1867     | 378450076 | - | 1634718-1634879 | hypothetical protein                            | 1582909-1583070 | - | 162 |
| 140285  | STM14_1872     | 378450081 | + | 1637216-1637431 | putative phage-related secreted protein         | 1585407-1585622 | + | 216 |
| ST474   | STM474_1578    | 379700736 | - | 1602385-1602519 | hypothetical protein                            | 1603701-1603835 | - | 135 |
| 140285  | STM14_1890     | 378450098 | + | 1657503-1657634 | hypothetical protein                            | 1605695-1605826 | + | 132 |
| 140285  | STM14_1895     | 378450103 | + | 1663489-1663641 | hypothetical protein                            | 1611681-1611833 | + | 153 |
| 140285  | STM14_1897     | 378450105 | - | 1664885-1665067 | hypothetical protein                            | 1613077-1613259 | - | 183 |
| 140285  | STM14_1902     | 378450110 | + | 1668962-1669093 | hypothetical protein                            | 1617154-1617285 | + | 132 |
| 140285  | STM14_1904     | 378450112 | - | 1670559-1670702 | hypothetical protein                            | 1618751-1618894 | - | 144 |
| 140285  | STM14_1911     | 378450119 | - | 1679194-1679457 | hypothetical protein                            | 1627386-1627649 | - | 264 |
| 140285  | STM14_1913     | 378450121 | + | 1680178-1680390 | hypothetical protein                            | 1628370-1628582 | + | 213 |
| 140285  | STM14_1914     | 378450122 | - | 1680335-1680472 | hypothetical protein                            | 1628527-1628664 | - | 138 |
| 140285  | STM14_1915     | 378450123 | + | 1680342-1680476 | hypothetical protein                            | 1628534-1628668 | + | 135 |
| 140285  | STM14_1919     | 378450127 | - | 1683664-1683783 | hypothetical protein                            | 1631856-1631975 | - | 120 |
| 140285  | STM14_1922     | 378450130 | + | 1686850-1686969 | hypothetical protein                            | 1635042-1635161 | + | 120 |
| 140285  | STM14_1923     | 378450131 | - | 1686958-1687080 | hypothetical protein                            | 1635150-1635272 | - | 123 |
| 140285  | STM14_1932     | 410023183 | + | 1696611-1696706 | hypothetical protein                            | 1644803-1644898 | + | 96  |
| 140285  | STM14_1933     | 378450141 | + | 1696703-1696807 | hypothetical protein                            | 1644895-1644999 | + | 105 |
| 140285  | STM14_1939     | 378450147 | - | 1701681-1701785 | hypothetical protein                            | 1649873-1649977 | - | 105 |
| 140285  | STM14_1950     | 378450158 | + | 1711642-1711749 | hypothetical protein                            | 1659834-1659941 | + | 108 |
| 140285  | STM14_1961     | 378450169 | + | 1719701-1719814 | hypothetical protein                            | 1667893-1668006 | + | 114 |
| 140285  | STM14_1967     | 378450175 | + | 1727480-1727695 | hypothetical protein                            | 1675672-1675887 | + | 216 |
| T000240 | STMDT12_C16480 | 378984189 | - | 1717552-1717677 | hypothetical protein                            | 1678030-1678155 | - | 126 |
| ST474   | STM474_1641    | 379700799 | + | 1676859-1677014 | hypothetical protein                            | 1678175-1678330 | + | 156 |
| 140285  | STM14_1972     | 378450180 | - | 1731028-1731312 | hypothetical protein                            | 1679220-1679324 | - | 105 |
| 140285  | STM14_1973     | 378450181 | + | 1731115-1731225 | hypothetical protein                            | 1679307-1679417 | + | 111 |
| 140285  | STM14_1976     | 378450184 | - | 1733662-1733814 | hypothetical protein                            | 1681854-1682006 | - | 153 |
| T000240 | STMDT12_C16570 | 378984198 | - | 1726118-1726213 | hypothetical protein                            | 1686596-1686691 | - | 96  |
| 140285  | STM14_1996     | 378450204 | - | 1755685-1755894 | hypothetical protein                            | 1703877-1704086 | - | 210 |
| T000240 | STMDT12_C16740 | 378984215 | - | 1744637-1744789 | hypothetical protein                            | 1705115-1705267 | - | 153 |
| 140285  | STM14_2004     | 378450212 | - | 1762419-1762580 | hypothetical protein                            | 1710611-1710722 | - | 162 |
| 140285  | STM14_2024     | 378450229 | - | 1779789-1779902 | hypothetical protein                            | 1727981-1728094 | - | 114 |
| 140285  | STM14_2048     | 378450253 | - | 1800491-1800637 | hypothetical protein                            | 1748683-1748829 | - | 147 |
| 140285  | STM14_2049     | 378450254 | + | 1800647-1800769 | hypothetical protein                            | 1748839-1748961 | + | 123 |
| 140285  | STM14_2054     | 378450259 | - | 1803682-1803798 | hypothetical protein                            | 1751874-1751990 | - | 117 |
| 140285  | STM14_2057     | 378450262 | + | 1807079-1807216 | hypothetical protein                            | 1755271-1755408 | + | 138 |
| 140285  | STM14_2061     | 378450266 | - | 1810467-1810628 | hypothetical protein                            | 1758659-1758820 | - | 162 |
| 140285  | STM14_2065     | 378450270 | + | 1812029-1812142 | hypothetical protein                            | 1760221-1760334 | + | 114 |
| 140285  | STM14_2071     | 378450276 | - | 1818504-1818674 | hypothetical protein                            | 1766696-1766866 | - | 171 |
| 140285  | STM14_2073     | 378450278 | + | 1820026-1820190 | hypothetical protein                            | 1768218-1768382 | + | 165 |
| 140285  | STM14_2076     | 378450281 | - | 1823233-1823364 | hypothetical protein                            | 1771425-1771556 | - | 132 |
| 140285  | STM14_2079     | 378450284 | + | 1824904-1825014 | hypothetical protein                            | 1773096-1773206 | + | 111 |
| 140285  | STM14_2117     | 378450320 | + | 1858398-1858580 | hypothetical protein                            | 1806590-1806772 | + | 183 |
| 140285  | STM14_2123     | 378450326 | - | 1863160-1863279 | hypothetical protein                            | 1811352-1811471 | - | 120 |
| 140285  | STM14_2128     | 378450328 | + | 1865980-1866144 | hypothetical protein                            | 1814172-1814336 | + | 165 |
| 140285  | STM14_2133     | 378450333 | + | 1872924-1873043 | hypothetical protein                            | 1821116-1821235 | + | 120 |
| 140285  | STM14_2135     | 378450335 | - | 1874718-1874903 | hypothetical protein                            | 1822910-1823095 | - | 186 |
| 140285  | STM14_2148     | 378450348 | - | 1886567-1886695 | hypothetical protein                            | 1834759-1834887 | - | 129 |
| 140285  | STM14_2151     | 378450351 | - | 1888181-1888351 | hypothetical protein                            | 1836373-1836543 | - | 171 |
| 140285  | STM14_2152     | 378450352 | - | 1888329-1888433 | hypothetical protein                            | 1836521-1836625 | - | 105 |
| 140285  | STM14_2158     | 378450358 | - | 1893588-1893701 | hypothetical protein                            | 1841780-1841893 | - | 114 |
| 140285  | STM14_2160     | 378450360 | - | 1895293-1895421 | hypothetical protein                            | 1843485-1843613 | - | 129 |
| 140285  | STM14_2171     | 378450371 | - | 1905555-1905662 | hypothetical protein                            | 1853747-1853854 | - | 108 |
| 140285  | STM14_2180     | 378450380 | - | 1914824-1914934 | hypothetical protein                            | 1863016-1863126 | - | 111 |
| 140285  | STM14_2187     | 378450387 | + | 1920441-1920559 | hypothetical protein                            | 1868633-1868749 | + | 117 |
| 140285  | STM14_2189     | 378450389 | - | 1920801-1920897 | hypothetical protein                            | 1868993-1869091 | - | 99  |
| 140285  | STM14_2200     | 378450400 | + | 1928329-1928535 | hypothetical protein                            | 1876520-1876726 | + | 207 |
| 140285  | STM14_2219     | 378450419 | - | 1946749-1946859 | hypothetical protein                            | 1894940-1895050 | - | 111 |
| 140285  | STM14_2222     | 378450422 | + | 1947434-1947541 | hypothetical protein                            | 1895625-1895732 | + | 108 |
| 140285  | STM14_2223     | 378450423 | + | 1947556-1947696 | hypothetical protein                            | 1895747-1895887 | + | 141 |
| 140285  | STM14_2224     | 378450424 | - | 1947624-1947740 | hypothetical protein                            | 1895815-1895931 | - | 117 |
| T000240 | STMDT12_C18620 | 378984403 | - | 1934900-1935001 | hypothetical protein                            | 1897151-1897252 | - | 102 |
| 140285  | STM14_2229     | 378450429 | - | 1949871-1949978 | hypothetical protein                            | 1898062-1898169 | - | 108 |
| 140285  | STM14_2238     | 378450438 | + | 1961391-1961522 | hypothetical protein                            | 1909582-1909713 | + | 132 |
| ST474   | STM474_1877    | 379701031 | - | 1908925-1909098 | hypothetical protein                            | 1910953-1911126 | - | 174 |
| 140285  | STM14_2243     | 378450443 | + | 1963183-1963311 | hypothetical protein                            | 1911374-1911502 | + | 129 |
| 140285  | STM14_2245     | 378450445 | + | 1964429-1964551 | hypothetical protein                            | 1912620-1912742 | + | 123 |
| 140285  | STM14_2246     | 378450446 | - | 1964644-1964787 | hypothetical protein                            | 1912835-1912978 | - | 144 |
| D23580  | STMWW_18461    | 378445260 | + | 1947071-1947241 | hypothetical protein                            | 1913437-1913607 | + | 171 |
| 140285  | STM14_2250     | 378450450 | - | 1966960-1967154 | hypothetical protein                            | 1915151-1915345 | - | 195 |
| ST474   | STM474_1884    | 379701038 | - | 1913724-1913852 | hypothetical protein                            | 1915752-1915880 | - | 129 |
| 140285  | STM14_2255     | 378450453 | - | 1970094-1970294 | hypothetical protein                            | 1918285-1918485 | - | 209 |
| 140285  | STM14_2261     | 378450458 | + | 1973229-1973375 | hypothetical protein                            | 1921420-1921566 | + | 147 |
| ST474   | STM474_1893    | 379701046 | - | 1920052-1920177 | arsenical pump membrane protein                 | 1922080-1922205 | - | 126 |
| 140285  | STM14_2263     | 378450459 | - | 1973981-1974151 | hypothetical protein                            | 1922172-1922342 | - | 171 |
| 140285  | STM14_2264     | 378450460 | + | 1974277-1974393 | tail fiber assembly protein                     | 1922468-1922584 | + | 117 |
| 140285  | STM14_2268     | 378450464 | + | 1976235-1976423 | hypothetical protein                            | 1924426-1924614 | + | 189 |
| 140285  | STM14_2270     | 378450466 | + | 1976705-1976878 | hypothetical protein                            | 1924896-1925069 | + | 174 |
| 140285  | STM14_2271     | 378450467 | + | 1976808-1976927 | hypothetical protein                            | 1924999-1925118 | + | 120 |



|         |                |           |   |                 |                                        |                 |   |     |
|---------|----------------|-----------|---|-----------------|----------------------------------------|-----------------|---|-----|
| 14028S  | STM14_2276     | 378450471 | - | 1979312-1979440 | hypothetical protein                   | 1927503-1927631 | - | 129 |
| T000240 | STMDT12_C19080 | 378984449 | + | 1972383-1972478 | hypothetical protein                   | 1936438-1936533 | + | 96  |
| 14028S  | STM14_2291     | 378450486 | - | 1990827-1990985 | hypothetical protein                   | 1939018-1939176 | - | 159 |
| 14028S  | STM14_2293     | 378450488 | + | 1992662-1992787 | hypothetical protein                   | 1940853-1940978 | + | 126 |
| 14028S  | STM14_2294     | 378450489 | - | 1992755-1992874 | hypothetical protein                   | 1940946-1941065 | - | 120 |
| 14028S  | STM14_2298     | 378450493 | + | 1996367-1996594 | hypothetical protein                   | 1944558-1944785 | + | 228 |
| 14028S  | STM14_2305     | 378450500 | + | 2002147-2002269 | hypothetical protein                   | 1950338-1950460 | + | 123 |
| 14028S  | STM14_2306     | 378450501 | - | 2002264-2002389 | hypothetical protein                   | 1950455-1950580 | - | 126 |
| 14028S  | STM14_2313     | 378450507 | + | 2008446-2008562 | hypothetical protein                   | 1956637-1956753 | + | 117 |
| 14028S  | STM14_2321     | 378450515 | + | 2013869-2013985 | hypothetical protein                   | 1962060-1962176 | + | 117 |
| 14028S  | STM14_2323     | 378450517 | + | 2015793-2015897 | hypothetical protein                   | 1963984-1964088 | + | 105 |
| 14028S  | STM14_2329     | 378450523 | + | 2022930-2023187 | hypothetical protein                   | 1971121-1971378 | + | 258 |
| 14028S  | STM14_2339     | 378450533 | - | 2032400-2032531 | hypothetical protein                   | 1980591-1980722 | - | 132 |
| 14028S  | STM14_2342     | 378450536 | - | 2033684-2033827 | hypothetical protein                   | 1981875-1982018 | - | 144 |
| 14028S  | STM14_2349     | 378450542 | + | 2038156-2038305 | hypothetical protein                   | 1986347-1986496 | + | 150 |
| D23580  | STMMW_19262    | 378445334 | - | 2022476-2022553 | hypothetical protein                   | 1998563-1998640 | - | 78  |
| 14028S  | STM14_2379     | 378450569 | - | 2060568-2060705 | hypothetical protein                   | 2008760-2008897 | - | 138 |
| 14028S  | STM14_2389     | 378450579 | - | 2067774-2067902 | hypothetical protein                   | 2015966-2016094 | - | 129 |
| 14028S  | STM14_2411     | 378450600 | + | 2084253-2084468 | hypothetical protein                   | 2032445-2032660 | + | 216 |
| ST474   | STM474_2026    | 379701174 | + | 2034563-2034694 | hypothetical protein                   | 2036592-2036723 | + | 132 |
| 14028S  | STM14_2417     | 378450606 | + | 2088843-2088962 | hypothetical protein                   | 2037035-2037154 | + | 120 |
| 14028S  | STM14_2419     | 378450608 | - | 2090431-2090643 | putative cold-shock protein            | 2038623-2038835 | - | 213 |
| 14028S  | STM14_2421     | 378450610 | - | 2091089-2091208 | hypothetical protein                   | 2039281-2039400 | - | 120 |
| 14028S  | STM14_2425     | 378450614 | - | 2093253-2093495 | hypothetical protein                   | 2041445-2041687 | - | 243 |
| 14028S  | STM14_2454     | 378450641 | - | 2114790-2115140 | hypothetical protein                   | 2062983-2063333 | - | 351 |
| 14028S  | STM14_2455     | 378450642 | - | 2115201-2115503 | hypothetical protein                   | 2063394-2063696 | - | 303 |
| 14028S  | STM14_2456     | 378450643 | - | 2115612-2115710 | hypothetical protein                   | 2063805-2063903 | - | 99  |
| 14028S  | STM14_2459     | 378450646 | - | 2116837-2117451 | lytic enzyme (putative glycohydrolase) | 2065030-2065644 | - | 615 |
| 14028S  | STM14_2461     | 378450648 | + | 2117839-2117967 | hypothetical protein                   | 2066032-2066160 | + | 129 |
| D23580  | STMMW_20121    | 378445417 | + | 2090064-2090498 | phage protein                          | 2066153-2066587 | + | 435 |
| 14028S  | STM14_2468     | 378450655 | - | 2122501-2123025 | putative transcriptional activator     | 2070694-2071218 | - | 525 |
| 14028S  | STM14_2478     | 378450665 | + | 2129593-2129823 | hypothetical protein                   | 2077786-2078016 | + | 231 |
| T000240 | STMDT12_C20240 | 378984565 | - | 2079358-2079462 | hypothetical protein                   | 2083561-2083665 | - | 105 |
| SL1344  | SL1344_1980    | 378699918 | + | 2082737-2083000 | hypothetical protein                   | 2084766-2085038 | + | 273 |
| ST474   | STM474_2085    | 379701227 | - | 2082744-2082878 | hypothetical protein                   | 2084773-2084907 | - | 135 |
| ST474   | STM474_2089    | 379701231 | + | 2088148-2088282 | hypothetical protein                   | 2090177-2090311 | + | 135 |
| 798     | UMN798_2172    | 383496723 | - | 2087536-2087634 | hypothetical protein                   | 2090204-2090302 | - | 99  |
| T000240 | STMDT12_C20320 | 378984573 | + | 2086418-2086567 | hypothetical protein                   | 2090621-2090770 | + | 150 |
| 14028S  | STM14_2494     | 378450678 | - | 2142487-2142741 | hypothetical protein                   | 2090680-2090934 | - | 255 |
| ST474   | STM474_2091    | 379701233 | + | 2088820-2088942 | hypothetical protein                   | 2090849-2090971 | + | 123 |
| 14028S  | STM14_2497     | 378450681 | - | 2144828-2145214 | hypothetical protein                   | 2093021-2093407 | - | 387 |
| 14028S  | STM14_2498     | 378450682 | + | 2145540-2145707 | hypothetical protein                   | 2093733-2093900 | + | 168 |
| 14028S  | STM14_2501     | 378450684 | - | 2147387-2147539 | hypothetical protein                   | 2095580-2095732 | - | 153 |
| 14028S  | STM14_2524     | 378450706 | - | 2165668-2165799 | hypothetical protein                   | 2113861-2113992 | - | 132 |
| 14028S  | STM14_2549     | 378450731 | - | 2185570-2185701 | hypothetical protein                   | 2133762-2133893 | - | 132 |
| 14028S  | STM14_2556     | 378450738 | - | 2192950-2193219 | hypothetical protein                   | 2141142-2141411 | - | 270 |
| 14028S  | STM14_2558     | 378450740 | - | 2195674-2195796 | hypothetical protein                   | 2143866-2143988 | - | 123 |
| 14028S  | STM14_2561     | 378450743 | + | 2198729-2198896 | hypothetical protein                   | 2146921-2147088 | + | 168 |
| 14028S  | STM14_2562     | 378450744 | - | 2198740-2198937 | hypothetical protein                   | 2146932-2147129 | - | 198 |
| 14028S  | STM14_2599     | 378450781 | + | 2239941-2240216 | hypothetical protein                   | 2188134-2188409 | + | 276 |
| 14028S  | STM14_2614     | 378450796 | + | 2254277-2254522 | hypothetical protein                   | 2202470-2202715 | + | 246 |
| 14028S  | STM14_2619     | 378450801 | - | 2259828-2259998 | hypothetical protein                   | 2208021-2208191 | - | 171 |
| 14028S  | STM14_2623     | 378450805 | - | 2265633-2265749 | hypothetical protein                   | 2213825-2213941 | - | 117 |
| 14028S  | STM14_2635     | 378450816 | - | 2282708-2282821 | hypothetical protein                   | 2230900-2231013 | - | 114 |
| 14028S  | STM14_2639     | 378450819 | + | 2285114-2285233 | hypothetical protein                   | 2233306-2233425 | + | 120 |
| 14028S  | STM14_2640     | 378450820 | - | 2285366-2285482 | hypothetical protein                   | 2233558-2233674 | - | 117 |
| 14028S  | STM14_2649     | 378450829 | - | 2293497-2293682 | hypothetical protein                   | 2241689-2241874 | - | 186 |
| 14028S  | STM14_2651     | 378450831 | - | 2294185-2294343 | hypothetical protein                   | 2242377-2242535 | - | 159 |
| ST474   | STM474_2254    | 379701393 | + | 2258581-2258763 | hypothetical protein                   | 2260610-2260792 | + | 183 |
| 14028S  | STM14_2671     | 378450851 | - | 2315124-2315237 | hypothetical protein                   | 2263316-2263429 | - | 114 |
| 14028S  | STM14_2674     | 378450854 | - | 2317916-2318191 | hypothetical protein                   | 2266108-2266383 | - | 276 |
| 14028S  | STM14_2676     | 378450856 | + | 2318810-2318917 | hypothetical protein                   | 2267002-2267109 | + | 108 |
| 14028S  | STM14_2697     | 378450877 | + | 2338065-2338184 | hypothetical protein                   | 2286257-2286376 | + | 120 |
| 14028S  | STM14_2701     | 378450881 | + | 2340683-2340847 | hypothetical protein                   | 2288875-2289039 | + | 165 |
| 14028S  | STM14_2704     | 378450884 | - | 2342649-2342762 | hypothetical protein                   | 2290841-2290954 | - | 114 |
| 14028S  | STM14_2705     | 378450885 | - | 2342720-2342848 | hypothetical protein                   | 2290912-2291040 | - | 129 |
| 14028S  | STM14_2706     | 378450886 | + | 2342834-2343067 | hypothetical protein                   | 2291026-2291259 | + | 234 |
| 14028S  | STM14_2710     | 378450890 | - | 2345635-2345787 | hypothetical protein                   | 2293827-2293979 | - | 153 |
| 14028S  | STM14_2714     | 378450894 | + | 2349999-2350304 | hypothetical protein                   | 2298191-2298496 | + | 306 |
| 14028S  | STM14_2716     | 378450896 | - | 2351963-2352097 | hypothetical protein                   | 2300155-2300289 | - | 135 |
| 14028S  | STM14_2718     | 378450898 | - | 2352991-2353110 | hypothetical protein                   | 2301183-2301302 | - | 120 |
| ST474   | STM474_2293    | 379701432 | - | 2300273-2300395 | hypothetical protein                   | 2302302-2302424 | - | 123 |
| 14028S  | STM14_2724     | 378450904 | + | 2358928-2359059 | hypothetical protein                   | 2307120-2307251 | + | 132 |
| 14028S  | STM14_2725     | 378450905 | + | 2359144-2359266 | hypothetical protein                   | 2307336-2307458 | + | 123 |
| 14028S  | STM14_2726     | 378450906 | - | 2359149-2359277 | hypothetical protein                   | 2307341-2307469 | - | 129 |
| 14028S  | STM14_2730     | 378450910 | - | 2361472-2361576 | hypothetical protein                   | 2309664-2309768 | - | 105 |
| 14028S  | STM14_2731     | 378450911 | - | 2361699-2361953 | hypothetical protein                   | 2309891-2310145 | - | 255 |
| 14028S  | STM14_2736     | 378450915 | - | 2364975-2365205 | hypothetical protein                   | 2313167-2313397 | - | 231 |
| 14028S  | STM14_2738     | 378450917 | + | 2365897-2366040 | hypothetical protein                   | 2314089-2314232 | + | 144 |
| 14028S  | STM14_2750     | 378450929 | - | 2378246-2378392 | hypothetical protein                   | 2326438-2326584 | - | 147 |
| T000240 | STMDT12_C22520 | 378984793 | - | 2327280-2327405 | hypothetical protein                   | 2331482-2331607 | - | 126 |
| 14028S  | STM14_2764     | 378450942 | - | 2389094-2389207 | hypothetical protein                   | 2337286-2337399 | - | 114 |
| 14028S  | STM14_2774     | 378450952 | + | 2397715-2397861 | hypothetical protein                   | 2345907-2346053 | + | 147 |
| 14028S  | STM14_2791     | 378450969 | + | 2411310-2411441 | hypothetical protein                   | 2359502-2359633 | + | 132 |
| 14028S  | STM14_2798     | 378450976 | + | 2418131-2418256 | hypothetical protein                   | 2366323-2366448 | + | 126 |
| 14028S  | STM14_2803     | 378450980 | - | 2425164-2425280 | hypothetical protein                   | 2373356-2373472 | - | 117 |
| 14028S  | STM14_2805     | 378450982 | + | 2427980-2428210 | hypothetical protein                   | 2376172-2376402 | + | 231 |
| 14028S  | STM14_2806     | 378450983 | + | 2428153-2428293 | hypothetical protein                   | 2376345-2376485 | + | 141 |
| 14028S  | STM14_2811     | 378450988 | + | 2432657-2432773 | hypothetical protein                   | 2380849-2380965 | + | 117 |
| 14028S  | STM14_2822     | 378450999 | + | 2445948-2446052 | hypothetical protein                   | 2394140-2394244 | + | 105 |
| 14028S  | STM14_2823     | 378451000 | + | 2446155-2446358 | hypothetical protein                   | 2394347-2394550 | + | 204 |
| 14028S  | STM14_2834     | 378451011 | + | 2455277-2455405 | hypothetical protein                   | 2403469-2403597 | + | 129 |
| ST474   | STM474_2412    | 379701547 | - | 2421293-2421412 | hypothetical protein                   | 2423322-2423441 | - | 120 |

|         |                |           |   |                 |                                                               |                 |   |     |
|---------|----------------|-----------|---|-----------------|---------------------------------------------------------------|-----------------|---|-----|
| 140285  | STM14_2854     | 378451030 | - | 2475407-2475529 | hypothetical protein                                          | 2423600-2423722 | - | 123 |
| 140285  | STM14_2855     | 378451031 | + | 2475538-2475645 | hypothetical protein                                          | 2423731-2423838 | + | 108 |
| 140285  | STM14_2856     | 378451032 | - | 2475654-2475836 | hypothetical protein                                          | 2423847-2424029 | + | 183 |
| 140285  | STM14_2870     | 378451046 | + | 2491031-2491153 | hypothetical protein                                          | 2439224-2439346 | + | 123 |
| 140285  | STM14_2871     | 378451047 | - | 2491241-2491357 | hypothetical protein                                          | 2439434-2439550 | - | 117 |
| 140285  | STM14_2880     | 378451056 | - | 2499179-2499430 | hypothetical protein                                          | 2447372-2447623 | - | 252 |
| 140285  | STM14_2881     | 378451057 | + | 2499320-2499454 | hypothetical protein                                          | 2447513-2447647 | + | 135 |
| 140285  | STM14_2890     | 378451066 | + | 2508681-2508854 | hypothetical protein                                          | 2456874-2457047 | + | 174 |
| 140285  | STM14_2902     | 378451078 | + | 2517875-2518045 | hypothetical protein                                          | 2466068-2466238 | + | 171 |
| 140285  | STM14_2911     | 378451087 | - | 2527947-2528102 | hypothetical protein                                          | 2476140-2476295 | - | 156 |
| 140285  | STM14_2921     | 378451097 | + | 2537322-2537438 | hypothetical protein                                          | 2485515-2485631 | + | 117 |
| 140285  | STM14_2940     | 378451116 | + | 2553683-2553823 | hypothetical protein                                          | 2501876-2502016 | + | 141 |
| 140285  | STM14_2941     | 378451117 | - | 2553820-2553948 | hypothetical protein                                          | 2502013-2502141 | - | 129 |
| T000240 | STMDT12_C24200 | 378984961 | + | 2507125-2507337 | hypothetical protein                                          | 2511327-2511539 | + | 213 |
| 140285  | STM14_2955     | 378451130 | - | 2569137-2569283 | hypothetical protein                                          | 2517330-2517476 | - | 147 |
| 140285  | STM14_2959     | 378451134 | + | 2573587-2573775 | hypothetical protein                                          | 2521780-2521968 | + | 189 |
| 140285  | STM14_2986     | 378451155 | + | 2595762-2595923 | hypothetical protein                                          | 2543955-2544116 | + | 162 |
| 140285  | STM14_2987     | 410023203 | - | 2595873-2595998 | hypothetical protein                                          | 2544066-2544191 | - | 126 |
| 140285  | STM14_2988     | 378451157 | + | 2595966-2596094 | hypothetical protein                                          | 2544159-2544287 | + | 129 |
| 140285  | STM14_3032     | 378451201 | + | 2633812-2634012 | hypothetical protein                                          | 2582005-2582205 | + | 201 |
| 140285  | STM14_3036     | 378451205 | - | 2637342-2637476 | hypothetical protein                                          | 2585535-2585669 | - | 135 |
| 140285  | STM14_3040     | 378451209 | + | 2640806-2640913 | hypothetical protein                                          | 2588999-2589106 | + | 108 |
| 140285  | STM14_3043     | 378451212 | - | 2645096-2645227 | hypothetical protein                                          | 2593289-2593420 | - | 132 |
| 140285  | STM14_3063     | 378451232 | - | 2664349-2664552 | hypothetical protein                                          | 2612542-2612745 | - | 204 |
| T000240 | STMDT12_C25240 | 378985065 | + | 2617191-2617382 | putative cytoplasmic protein                                  | 2621512-2621703 | + | 192 |
| 140285  | STM14_3079     | 378451248 | + | 2685671-2685784 | hypothetical protein                                          | 2633864-2633977 | + | 114 |
| 140285  | STM14_3080     | 378451249 | + | 2685675-2685857 | hypothetical protein                                          | 2633868-2634050 | + | 183 |
| 140285  | STM14_3081     | 378451250 | - | 2685854-2685967 | hypothetical protein                                          | 2634047-2634160 | - | 114 |
| ST474   | STM474_2618    | 379701745 | + | 2646222-2646344 | hypothetical protein                                          | 2648251-2648373 | + | 123 |
| 140285  | STM14_3086     | 378451254 | + | 2702354-2702470 | hypothetical protein                                          | 2650547-2650663 | + | 117 |
| 140285  | STM14_3087     | 378451255 | - | 2702529-2702684 | hypothetical protein                                          | 2650722-2650877 | - | 156 |
| 140285  | STM14_3090     | 378451258 | + | 2704480-2704581 | hypothetical protein                                          | 2652673-2652774 | + | 102 |
| 140285  | STM14_3096     | 378451264 | - | 2710094-2710216 | type IV pilus biogenesis/stability protein PilW               | 2658287-2658409 | - | 123 |
| 140285  | STM14_3099     | 378451267 | + | 2712052-2712147 | hypothetical protein                                          | 2660245-2660340 | + | 96  |
| 140285  | STM14_3107     | 378451275 | - | 2725280-2725504 | hypothetical protein                                          | 2673491-2673715 | - | 225 |
| ST474   | STM474_2636    | 379701763 | + | 2671480-2671593 | hypothetical protein                                          | 2673527-2673640 | + | 114 |
| 140285  | STM14_3109     | 378451277 | - | 2726253-2726387 | hypothetical protein                                          | 2674464-2674598 | - | 135 |
| 140285  | STM14_3119     | 378451287 | + | 2734356-2734475 | hypothetical protein                                          | 2682567-2682686 | + | 120 |
| 140285  | STM14_3122     | 378451290 | + | 2735856-2735978 | hypothetical protein                                          | 2684067-2684189 | + | 123 |
| 140285  | STM14_3123     | 378451291 | - | 2735883-2735993 | hypothetical protein                                          | 2684094-2684204 | - | 111 |
| 140285  | STM14_3134     | 378451302 | - | 2746625-2746771 | hypothetical protein                                          | 2694836-2694982 | - | 147 |
| 140285  | STM14_3144     | 378451312 | + | 2759420-2759548 | hypothetical protein                                          | 2707631-2707759 | + | 129 |
| 140285  | STM14_3165     | 378451333 | - | 2782226-2782354 | hypothetical protein                                          | 2730437-2730565 | - | 129 |
| ST474   | STM474_2692    | 379701819 | + | 2729509-2729628 | integrase, catalytic region                                   | 2731556-2731675 | - | 120 |
| SL1344  | SL1344_2548    | 378700486 | - | 2730253-2730318 | bacteriophage protein                                         | 2732300-2732365 | - | 66  |
| D23580  | STM474_26031   | 378446002 | - | 2757050-2757262 | putative prophage protein                                     | 2732428-2732640 | - | 213 |
| 140285  | STM14_1473     | 378449695 | - | 1321447-1322052 | hypothetical protein                                          | 2741283-2741888 | + | 606 |
| 140285  | STM14_3197     | 378451364 | + | 2811771-2811908 | hypothetical protein                                          | 2759971-2760108 | + | 138 |
| 140285  | STM14_3202     | 378451368 | - | 2814160-2814285 | hypothetical protein                                          | 2762360-2762485 | - | 126 |
| 140285  | STM14_3206     | 378451372 | - | 2815861-2816061 | hypothetical protein                                          | 2764061-2764261 | - | 201 |
| 140285  | STM14_1440     | 378449663 | + | 1298794-1299042 | putative bacteriophage protein                                | 2764904-2765152 | - | 249 |
| 140285  | STM14_3209     | 378451375 | + | 2816906-2817040 | prophage DinI                                                 | 2765106-2765240 | + | 135 |
| 140285  | STM14_3229     | 378451395 | + | 2830868-2831005 | hypothetical protein                                          | 2779120-2779257 | + | 138 |
| 140285  | STM14_3230     | 378451396 | - | 2831002-2831118 | hypothetical protein                                          | 2779254-2779370 | - | 117 |
| 140285  | STM14_3235     | 378451401 | - | 2833834-2833998 | hypothetical protein                                          | 2782086-2782250 | - | 165 |
| 140285  | STM14_3236     | 378451402 | - | 2833998-2834177 | hypothetical protein                                          | 2782250-2782429 | - | 180 |
| 140285  | STM14_3239     | 378451405 | - | 2836525-2836725 | putative methyltransferase                                    | 2784777-2784977 | - | 201 |
| 140285  | STM14_3249     | 378451415 | + | 2846371-2846505 | hypothetical protein                                          | 2794623-2794757 | + | 135 |
| 140285  | STM14_3259     | 378451420 | + | 2855709-2855837 | hypothetical protein                                          | 2803962-2804090 | + | 129 |
| 140285  | STM14_3260     | 378451421 | + | 2855915-2856031 | hypothetical protein                                          | 2804168-2804284 | + | 117 |
| 140285  | STM14_3267     | 378451427 | + | 2861933-2862097 | hypothetical protein                                          | 2810186-2810350 | + | 165 |
| 140285  | STM14_3272     | 378451432 | + | 2866577-2866735 | hypothetical protein                                          | 2814830-2814988 | + | 159 |
| 140285  | STM14_3273     | 378451433 | - | 2866637-2866750 | hypothetical protein                                          | 2814890-2815003 | - | 114 |
| 140285  | STM14_3280     | 378451440 | - | 2870862-2871008 | hypothetical protein                                          | 2819115-2819261 | - | 147 |
| 140285  | STM14_3282     | 378451442 | + | 2872506-2872700 | putative cytochrome c-type biogenesis protein (heme exporter) | 2820759-2820953 | + | 195 |
| 140285  | STM14_3291     | 378451450 | - | 2879362-2879469 | hypothetical protein                                          | 2827615-2827722 | - | 108 |
| 140285  | STM14_3295     | 378451454 | + | 2881056-2881160 | hypothetical protein                                          | 2829309-2829413 | + | 105 |
| 140285  | STM14_3296     | 378451455 | - | 2881388-2881540 | hypothetical protein                                          | 2829641-2829793 | - | 153 |
| 140285  | STM14_3301     | 378451459 | - | 2898012-2898236 | hypothetical protein                                          | 2846265-2846489 | - | 225 |
| 140285  | STM14_3309     | 378451467 | + | 2905915-2906040 | hypothetical protein                                          | 2854168-2854293 | + | 126 |
| 140285  | STM14_3312     | 378451470 | - | 2908421-2908582 | hypothetical protein                                          | 2856674-2856835 | - | 162 |
| 140285  | STM14_3324     | 378451481 | - | 2917712-2917867 | hypothetical protein                                          | 2865965-2866120 | - | 156 |
| 140285  | STM14_3326     | 378451483 | - | 2919626-2919739 | hypothetical protein                                          | 2867879-2867992 | - | 114 |
| ST474   | STM474_2898    | 379702018 | - | 2927700-2927858 | hypothetical protein                                          | 2873612-2873770 | - | 159 |
| T000240 | STMDT12_C28220 | 378985362 | - | 2935935-2936111 | hypothetical protein                                          | 2880857-2881033 | - | 177 |
| 140285  | STM14_3340     | 378451496 | + | 2935806-2935976 | hypothetical protein                                          | 2884059-2884229 | + | 171 |
| 140285  | STM14_3341     | 378451497 | - | 2936002-2936229 | hypothetical protein                                          | 2884255-2884482 | - | 228 |
| 140285  | STM14_3342     | 378451498 | - | 2936297-2936449 | hypothetical protein                                          | 2884550-2884702 | - | 153 |
| 140285  | STM14_3343     | 378451499 | + | 2936325-2936507 | hypothetical protein                                          | 2884578-2884760 | + | 183 |
| 140285  | STM14_3351     | 378451506 | + | 2948161-2948499 | hypothetical protein                                          | 2896414-2896752 | + | 339 |
| 140285  | STM14_3353     | 378451508 | + | 2949636-2949833 | hypothetical protein                                          | 2897889-2898086 | + | 198 |
| 140285  | STM14_3355     | 378451510 | - | 2950805-2950957 | hypothetical protein                                          | 2899058-2899210 | - | 153 |
| 140285  | STM14_3356     | 378451511 | + | 2951059-2951226 | hypothetical protein                                          | 2899312-2899479 | + | 168 |
| 140285  | STM14_3364     | 378451519 | + | 2957937-2958050 | hypothetical protein                                          | 2906190-2906303 | + | 114 |
| 140285  | STM14_3372     | 378451527 | + | 2965822-2965938 | hypothetical protein                                          | 2914075-2914191 | + | 117 |
| 140285  | STM14_3378     | 378451533 | + | 2968220-2968345 | hypothetical protein                                          | 2916473-2916598 | + | 126 |
| 140285  | STM14_3379     | 378451534 | + | 2968355-2968534 | hypothetical protein                                          | 2916608-2916787 | + | 180 |
| 140285  | STM14_3382     | 378451537 | - | 2969378-2969494 | hypothetical protein                                          | 2917631-2917747 | - | 117 |
| 140285  | STM14_3386     | 378451541 | + | 2971817-2971993 | hypothetical protein                                          | 2920070-2920246 | + | 177 |
| 140285  | STM14_3394     | 378451549 | + | 2979522-2979632 | hypothetical protein                                          | 2927775-2927885 | + | 111 |
| 140285  | STM14_3396     | 378451551 | - | 2981060-2981167 | hypothetical protein                                          | 2929313-2929420 | - | 108 |
| 140285  | STM14_3398     | 378451553 | - | 2981900-2982022 | hypothetical protein                                          | 2930153-2930275 | - | 123 |
| 140285  | STM14_3411     | 378451561 | + | 2991063-2991173 | hypothetical protein                                          | 2939316-2939426 | + | 111 |

|         |                |           |   |                 |                                  |                 |   |     |
|---------|----------------|-----------|---|-----------------|----------------------------------|-----------------|---|-----|
| 140285  | STM14_3414     | 378451564 | + | 2994186-2994350 | hypothetical protein             | 2942439-2942603 | + | 165 |
| 140285  | STM14_3415     | 378451565 | - | 2994269-2994475 | hypothetical protein             | 2942522-2942728 | - | 207 |
| 140285  | STM14_3419     | 378451569 | + | 2996927-2997172 | hypothetical protein             | 2945180-2945425 | + | 246 |
| 140285  | STM14_3421     | 378451571 | + | 2998326-2998466 | hypothetical protein             | 2946579-2946719 | + | 141 |
| 140285  | STM14_3427     | 378451577 | - | 3001727-3001867 | hypothetical protein             | 2949980-2950120 | - | 141 |
| 140285  | STM14_3433     | 378451583 | - | 3007751-3007963 | hydrogenase maturation protein   | 2956004-2956216 | - | 213 |
| 140285  | STM14_3435     | 378451585 | - | 3010214-3010348 | hypothetical protein             | 2958467-2958601 | - | 135 |
| 140285  | STM14_3437     | 378451587 | - | 3010872-3011006 | hypothetical protein             | 2959125-2959259 | - | 135 |
| 140285  | STM14_3447     | 378451597 | - | 3019238-3019342 | hypothetical protein             | 2967491-2967595 | - | 105 |
| 140285  | STM14_3449     | 378451599 | + | 3019869-3020072 | hypothetical protein             | 2968122-2968325 | + | 204 |
| 140285  | STM14_3457     | 378451607 | + | 3026426-3026551 | hypothetical protein             | 2974679-2974804 | + | 126 |
| 140285  | STM14_3464     | 378451614 | + | 3032212-3032319 | hypothetical protein             | 2980465-2980572 | + | 108 |
| 140285  | STM14_3466     | 378451616 | - | 3033296-3033403 | hypothetical protein             | 2981549-2981656 | - | 108 |
| 140285  | STM14_3502     | 378451652 | - | 3066393-3066497 | hypothetical protein             | 3014646-3014750 | - | 105 |
| D23580  | STMMW_28661    | 378446261 | + | 3039872-3039979 | pathogenicity island 1 protein   | 3015374-3015481 | + | 108 |
| 140285  | STM14_3504     | 378451654 | + | 3067340-3067483 | hypothetical protein             | 3015593-3015736 | - | 144 |
| 140285  | STM14_3508     | 378451657 | + | 3068687-3068806 | hypothetical protein             | 3016940-3017059 | + | 120 |
| 140285  | STM14_3528     | 378451677 | + | 3087981-3088118 | hypothetical protein             | 3036221-3036358 | + | 138 |
| 140285  | STM14_3535     | 378451684 | - | 3092010-3092120 | hypothetical protein             | 3040250-3040360 | - | 111 |
| ST474   | STM474_3077    | 379702190 | + | 3100048-3100164 | hypothetical protein             | 3045964-3046080 | + | 117 |
| 140285  | STM14_3549     | 378451698 | - | 3106978-3107112 | hypothetical protein             | 3054730-3054864 | - | 135 |
| ST474   | STM474_3093    | 379702206 | + | 3116333-3116446 | hypothetical protein             | 3062249-3062362 | + | 114 |
| 140285  | STM14_3560     | 378451709 | + | 3121321-3121458 | hypothetical protein             | 3068890-3069027 | + | 138 |
| 140285  | STM14_3561     | 378451710 | + | 3121826-3121978 | putative fibrillar subunit       | 3069395-3069547 | + | 153 |
| 140285  | STM14_3562     | 378451711 | - | 3121988-3122278 | hypothetical protein             | 3069557-3069847 | - | 291 |
| 140285  | STM14_3571     | 378451720 | + | 3134509-3134736 | hypothetical protein             | 3082078-3082305 | + | 228 |
| 140285  | STM14_3579     | 378451727 | + | 3140022-3140165 | hypothetical protein             | 3087591-3087734 | + | 144 |
| 140285  | STM14_3580     | 378451728 | + | 3140255-3140359 | hypothetical protein             | 3087824-3087928 | + | 105 |
| 140285  | STM14_3583     | 378451731 | - | 3143293-3143478 | hypothetical protein             | 3090862-3091047 | - | 186 |
| 140285  | STM14_3585     | 378451733 | - | 3144205-3144342 | L-1,2-propanediol oxidoreductase | 3091774-3091911 | - | 138 |
| 140285  | STM14_3588     | 378451736 | - | 3146280-3146447 | hypothetical protein             | 3093849-3094016 | - | 168 |
| 140285  | STM14_3600     | 378451747 | + | 3157563-3157685 | hypothetical protein             | 3105132-3105254 | + | 123 |
| 140285  | STM14_3616     | 378451761 | + | 3177651-3177833 | hypothetical protein             | 3125220-3125402 | + | 183 |
| 140285  | STM14_3619     | 378451764 | - | 3179499-3179657 | hypothetical protein             | 3127068-3127226 | - | 159 |
| 140285  | STM14_3622     | 378451767 | - | 3182548-3182661 | hypothetical protein             | 3130117-3130230 | - | 114 |
| 140285  | STM14_3623     | 378451768 | + | 3182641-3182757 | hypothetical protein             | 3130210-3130326 | + | 117 |
| 140285  | STM14_3624     | 378451769 | - | 3182858-3183004 | hypothetical protein             | 3130427-3130573 | - | 147 |
| 140285  | STM14_3625     | 378451770 | + | 3183029-3183154 | hypothetical protein             | 3130598-3130723 | + | 126 |
| 140285  | STM14_3626     | 378451771 | - | 3183053-3183160 | hypothetical protein             | 3130622-3130729 | - | 108 |
| 140285  | STM14_3628     | 378451773 | + | 3183985-3184095 | hypothetical protein             | 3131554-3131664 | + | 111 |
| 140285  | STM14_3631     | 378451776 | + | 3185172-3185342 | hypothetical protein             | 3132741-3132911 | + | 171 |
| D23580  | STMMW_29721    | 378446366 | - | 3162322-3162468 | hypothetical protein             | 3137690-3137836 | - | 147 |
| 140285  | STM14_3635     | 378451780 | - | 3190309-3190434 | hypothetical protein             | 3137878-3138003 | - | 126 |
| 140285  | STM14_3642     | 378451787 | - | 3197131-3197247 | hypothetical protein             | 3144700-3144816 | - | 117 |
| 140285  | STM14_3645     | 378451790 | - | 3199028-3199198 | hypothetical protein             | 3146597-3146767 | - | 171 |
| 140285  | STM14_3649     | 378451794 | + | 3202193-3202315 | hypothetical protein             | 3149762-3149884 | + | 123 |
| 140285  | STM14_3658     | 378451803 | + | 3210549-3210968 | hypothetical protein             | 3158154-3158573 | + | 420 |
| 140285  | STM14_3662     | 378451807 | - | 3213534-3213719 | hypothetical protein             | 3161139-3161324 | - | 186 |
| 140285  | STM14_3666     | 378451810 | - | 3215425-3215670 | hypothetical protein             | 3163030-3163275 | - | 246 |
| T000240 | STMDT12_C30880 | 378985628 | + | 3219618-3219734 | hypothetical protein             | 3163099-3163215 | + | 117 |
| 140285  | STM14_3670     | 378451813 | + | 3217519-3217686 | hypothetical protein             | 3165124-3165291 | + | 168 |
| 140285  | STM14_3680     | 378451823 | + | 3225806-3226042 | hypothetical protein             | 3173411-3173647 | + | 237 |
| 140285  | STM14_3686     | 378451829 | - | 3230904-3231050 | immunoglobulin VH domain protein | 3178509-3178655 | - | 147 |
| 140285  | STM14_3690     | 378451833 | + | 3235813-3235968 | hypothetical protein             | 3183418-3183573 | + | 156 |
| 140285  | STM14_3691     | 378451834 | + | 3236175-3236279 | hypothetical protein             | 3183780-3183884 | + | 105 |
| 140285  | STM14_3693     | 378451836 | + | 3237457-3237624 | hypothetical protein             | 3185062-3185229 | + | 168 |
| 140285  | STM14_3700     | 378451843 | + | 3243685-3243795 | hypothetical protein             | 3191290-3191400 | + | 111 |
| 140285  | STM14_3702     | 378451845 | + | 3244595-3244732 | hypothetical protein             | 3192200-3192337 | + | 138 |
| 140285  | STM14_3704     | 378451847 | + | 3245634-3245885 | hypothetical protein             | 3193239-3193490 | + | 252 |
| 140285  | STM14_3711     | 378451854 | + | 3252233-3252433 | hypothetical protein             | 3199838-3200038 | + | 201 |
| 140285  | STM14_3718     | 378451861 | + | 3257540-3257698 | hypothetical protein             | 3205145-3205303 | + | 159 |
| 140285  | STM14_3722     | 378451865 | + | 3260720-3260824 | hypothetical protein             | 3208325-3208429 | + | 105 |
| ST474   | STM474_3231    | 379702341 | + | 3267369-3267485 | putative racemase                | 3213393-3213509 | + | 117 |
| 140285  | STM14_3734     | 378451876 | - | 3271996-3272121 | hypothetical protein             | 3219601-3219726 | - | 126 |
| 140285  | STM14_3751     | 378451893 | - | 3285668-3285820 | hypothetical protein             | 3233273-3233425 | - | 153 |
| 140285  | STM14_3757     | 378451899 | - | 3289138-3289263 | hypothetical protein             | 3236743-3236868 | - | 126 |
| 140285  | STM14_3759     | 378451901 | - | 3290425-3290550 | hypothetical protein             | 3238030-3238155 | - | 126 |
| 140285  | STM14_3762     | 378451903 | - | 3293235-3293459 | hypothetical protein             | 3240840-3241064 | - | 225 |
| 140285  | STM14_3763     | 378451904 | + | 3293413-3293547 | hypothetical protein             | 3241018-3241152 | + | 135 |
| 140285  | STM14_3773     | 378451913 | - | 3301831-3301965 | hypothetical protein             | 3249436-3249570 | - | 135 |
| 140285  | STM14_3774     | 378451914 | + | 3302110-3302214 | hypothetical protein             | 3249715-3249819 | + | 105 |
| 140285  | STM14_3778     | 378451918 | - | 3305157-3305300 | hypothetical protein             | 3252762-3252905 | - | 144 |
| 140285  | STM14_3779     | 378451919 | - | 3305240-3305395 | putative cytoplasmic protein     | 3252845-3253000 | - | 156 |
| 140285  | STM14_3783     | 378451923 | + | 3308724-3308864 | hypothetical protein             | 3256329-3256469 | + | 141 |
| T000240 | STMDT12_C31860 | 378985726 | + | 3314720-3314875 | hypothetical protein             | 3257314-3257469 | + | 156 |
| 140285  | STM14_3786     | 378451926 | + | 3310018-3310173 | hypothetical protein             | 3257623-3257778 | + | 156 |
| 140285  | STM14_3789     | 378451928 | + | 3312290-3312427 | hypothetical protein             | 3259897-3260034 | + | 138 |
| 140285  | STM14_3790     | 378451929 | - | 3312496-3312606 | hypothetical protein             | 3260103-3260213 | - | 111 |
| 140285  | STM14_3792     | 378451931 | + | 3314050-3314181 | hypothetical protein             | 3261657-3261788 | + | 132 |
| 140285  | STM14_3793     | 378451932 | - | 3314188-3314334 | hypothetical protein             | 3261795-3261941 | - | 147 |
| 140285  | STM14_3794     | 378451933 | + | 3314216-3314410 | hypothetical protein             | 3261823-3262017 | + | 195 |
| 140285  | STM14_3798     | 378451937 | + | 3318584-3318703 | hypothetical protein             | 3266191-3266310 | + | 120 |
| 140285  | STM14_3800     | 378451939 | - | 3319990-3320106 | hypothetical protein             | 3267597-3267713 | - | 117 |
| 140285  | STM14_3801     | 378451940 | + | 3320290-3320487 | hypothetical protein             | 3267897-3268094 | + | 198 |
| 140285  | STM14_3803     | 378451942 | - | 3322464-3322571 | hypothetical protein             | 3270071-3270178 | - | 108 |
| ST474   | STM474_3301    | 379702409 | - | 3334473-3334658 | hypothetical protein             | 3279628-3279813 | - | 186 |
| 140285  | STM14_3815     | 378451954 | + | 3332051-3332179 | hypothetical protein             | 3279658-3279786 | + | 129 |
| 140285  | STM14_3830     | 378451969 | + | 3342234-3342434 | hypothetical protein             | 3289841-3290041 | + | 201 |
| 140285  | STM14_3833     | 378451972 | - | 3344492-3344629 | hypothetical protein             | 3292099-3292236 | - | 138 |
| 140285  | STM14_3834     | 378451973 | + | 3344530-3344640 | hypothetical protein             | 3292137-3292247 | + | 111 |
| ST474   | STM474_3318    | 379702426 | - | 3348584-3348700 | hypothetical protein             | 3293739-3293855 | - | 117 |
| 140285  | STM14_3837     | 378451976 | + | 3346625-3346789 | hypothetical protein             | 3294232-3294396 | + | 165 |
| 140285  | STM14_3840     | 378451979 | - | 3349441-3349545 | hypothetical protein             | 3297048-3297152 | - | 105 |

|         |             |           |   |                 |                      |                 |   |     |
|---------|-------------|-----------|---|-----------------|----------------------|-----------------|---|-----|
| 14028S  | STM14_3851  | 378451990 | + | 3361049-3361165 | hypothetical protein | 3308656-3308772 | + | 117 |
| ST474   | STM474_3334 | 379702442 | - | 3364546-3364662 | hypothetical protein | 3309701-3309817 | - | 117 |
| 14028S  | STM14_3860  | 378451999 | + | 3368291-3368398 | hypothetical protein | 3315898-3316005 | + | 108 |
| T000240 | STM14_3872  | 378452011 | - | 3377873-3378022 | hypothetical protein | 3325480-3325629 | - | 150 |
| 14028S  | STM14_3875  | 378452014 | + | 3380454-3380651 | hypothetical protein | 3328061-3328258 | + | 198 |
| 14028S  | STM14_3884  | 378452023 | + | 3390891-3391163 | hypothetical protein | 3338498-3338770 | + | 273 |
| 14028S  | STM14_3895  | 378452033 | + | 3402540-3402695 | hypothetical protein | 3350147-3350302 | + | 156 |
| 14028S  | STM14_3901  | 378452039 | - | 3408358-3408459 | hypothetical protein | 3355965-3356066 | - | 102 |
| 14028S  | STM14_3904  | 378452042 | + | 3410298-3410435 | hypothetical protein | 3357905-3358042 | + | 138 |
| 14028S  | STM14_3907  | 378452045 | - | 3412994-3413194 | hypothetical protein | 3360601-3360801 | - | 201 |
| ST474   | STM474_3403 | 379702507 | + | 3435178-3435297 | hypothetical protein | 3380333-3380452 | + | 120 |
| D23580  | STMMW_32461 | 378446633 | + | 3437229-3437615 | hypothetical protein | 3380665-3381051 | + | 387 |
| 14028S  | STM14_3932  | 378452069 | - | 3436508-3436648 | hypothetical protein | 3384115-3384255 | - | 141 |
| 14028S  | STM14_3933  | 378452070 | + | 3436575-3436694 | hypothetical protein | 3384182-3384301 | + | 120 |
| 14028S  | STM14_3934  | 378452071 | + | 3436648-3436776 | hypothetical protein | 3384255-3384383 | + | 129 |
| 14028S  | STM14_3938  | 378452075 | + | 3440518-3440661 | hypothetical protein | 3388125-3388268 | + | 144 |
| 14028S  | STM14_3965  | 378452100 | - | 3464611-3464718 | hypothetical protein | 3412218-3412325 | - | 108 |
| 14028S  | STM14_3987  | 378452120 | + | 3483983-3484117 | hypothetical protein | 3431590-3431724 | + | 135 |
| 14028S  | STM14_3996  | 378452128 | - | 3490436-3490546 | hypothetical protein | 3438043-3438153 | - | 111 |
| 14028S  | STM14_4018  | 378452150 | - | 3508092-3508241 | hypothetical protein | 3455699-3455848 | - | 150 |
| 14028S  | STM14_4019  | 378452151 | - | 3508281-3508475 | hypothetical protein | 3455888-3456082 | - | 195 |
| 14028S  | STM14_4023  | 378452155 | + | 3515633-3515794 | hypothetical protein | 3463240-3463401 | + | 162 |
| 14028S  | STM14_4034  | 378452166 | + | 3525086-3525205 | hypothetical protein | 3472693-3472812 | + | 120 |
| 14028S  | STM14_4051  | 378452183 | - | 3540466-3540597 | malate dehydrogenase | 3488073-3488204 | + | 132 |
| 14028S  | STM14_4053  | 378452185 | + | 3541795-3541923 | hypothetical protein | 3489402-3489530 | + | 129 |
| T000240 | STM14_4059  | 378452192 | + | 3551875-3551970 | hypothetical protein | 3490117-3490212 | + | 96  |
| ST474   | STM474_3527 | 379702628 | - | 3554690-3554815 | hypothetical protein | 3494776-3494901 | - | 126 |
| 14028S  | STM14_4069  | 378452201 | + | 3558566-3558757 | hypothetical protein | 3506173-3506364 | + | 192 |
| 14028S  | STM14_4074  | 378452206 | - | 3563669-3563851 | hypothetical protein | 3511276-3511458 | - | 183 |
| 14028S  | STM14_4075  | 378452207 | + | 3563867-3563971 | hypothetical protein | 3511474-3511578 | + | 105 |
| 14028S  | STM14_4081  | 378452213 | - | 3568595-3568738 | hypothetical protein | 3516202-3516345 | - | 144 |
| 14028S  | STM14_4088  | 378452220 | - | 3574592-3574753 | hypothetical protein | 3522199-3522360 | - | 162 |
| 14028S  | STM14_4089  | 378452221 | + | 3574662-3574820 | hypothetical protein | 3522269-3522427 | + | 159 |
| 14028S  | STM14_4093  | 378452225 | + | 3579746-3579922 | hypothetical protein | 3527353-3527529 | + | 177 |
| 14028S  | STM14_4094  | 378452226 | - | 3580182-3580316 | hypothetical protein | 3527789-3527923 | - | 135 |
| 14028S  | STM14_4095  | 378452227 | + | 3580370-3580480 | hypothetical protein | 3527977-3528087 | + | 111 |
| T000240 | STM14_4148  | 378452275 | - | 3611988-3612179 | elongation factor Tu | 3559595-3559786 | - | 192 |
| ST474   | STM474_3611 | 379702705 | + | 3620933-3621070 | hypothetical protein | 3560916-3561053 | + | 138 |
| 14028S  | STM14_4163  | 378452290 | + | 3623551-3623655 | hypothetical protein | 3571158-3571262 | + | 105 |
| 14028S  | STM14_4167  | 378452293 | + | 3626355-3626480 | hypothetical protein | 3573962-3574087 | + | 126 |
| 14028S  | STM14_4172  | 378452298 | + | 3629162-3629344 | hypothetical protein | 3576769-3576951 | + | 183 |
| 14028S  | STM14_4180  | 378452306 | + | 3635785-3635937 | hypothetical protein | 3583392-3583544 | + | 153 |
| 14028S  | STM14_4182  | 378452308 | - | 3637245-3637421 | hypothetical protein | 3584852-3585028 | - | 177 |
| 14028S  | STM14_4185  | 378452311 | - | 3640241-3640396 | hypothetical protein | 3587848-3588003 | - | 156 |
| 14028S  | STM14_4192  | 378452318 | - | 3649991-3650131 | hypothetical protein | 3597598-3597738 | - | 141 |
| 14028S  | STM14_4207  | 378452333 | - | 3663870-3663983 | hypothetical protein | 3611477-3611590 | - | 114 |
| 14028S  | STM14_4213  | 378452339 | - | 3670273-3670407 | hypothetical protein | 3617880-3618014 | - | 135 |
| 14028S  | STM14_4214  | 378452340 | + | 3670342-3670449 | hypothetical protein | 3617949-3618056 | + | 108 |
| 14028S  | STM14_4220  | 378452346 | + | 3677538-3677768 | hypothetical protein | 3625145-3625375 | + | 231 |
| 14028S  | STM14_4224  | 378452350 | + | 3680653-3680766 | hypothetical protein | 3628260-3628373 | + | 114 |
| 14028S  | STM14_4229  | 378452355 | - | 3684140-3684289 | hypothetical protein | 3631747-3631896 | - | 150 |
| 14028S  | STM14_4233  | 378452359 | - | 3690393-3690500 | hypothetical protein | 3638000-3638107 | - | 108 |
| 14028S  | STM14_4240  | 378452366 | - | 3698369-3698491 | hypothetical protein | 3645975-3646097 | - | 123 |
| 14028S  | STM14_4243  | 378452369 | - | 3700901-3701017 | hypothetical protein | 3648507-3648623 | - | 117 |
| 14028S  | STM14_4259  | 378452384 | - | 3722125-3722298 | hypothetical protein | 3669731-3669904 | - | 174 |
| 14028S  | STM14_4261  | 378452386 | + | 3723463-3723627 | hypothetical protein | 3671069-3671233 | + | 165 |
| 14028S  | STM14_4269  | 378452393 | + | 3728906-3729031 | hypothetical protein | 3676512-3676637 | + | 126 |
| 14028S  | STM14_4270  | 378452394 | + | 3729191-3729319 | hypothetical protein | 3676797-3676925 | + | 129 |
| ST474   | STM474_3713 | 379702806 | - | 3737509-3737628 | hypothetical protein | 3677491-3677610 | - | 120 |
| 14028S  | STM14_4277  | 378452401 | + | 3735927-3736031 | hypothetical protein | 3683534-3683638 | + | 105 |
| 14028S  | STM14_4291  | 378452415 | - | 3747318-3747434 | hypothetical protein | 3694925-3695041 | - | 117 |
| 14028S  | STM14_4296  | 378452420 | + | 3750462-3750605 | hypothetical protein | 3698069-3698212 | + | 144 |
| 14028S  | STM14_4316  | 378452440 | + | 3770553-3770684 | hypothetical protein | 3718160-3718291 | + | 132 |
| 14028S  | STM14_4325  | 378452449 | + | 3781138-3781305 | hypothetical protein | 3728745-3728912 | + | 168 |
| 14028S  | STM14_4333  | 378452457 | + | 3789092-3789217 | hypothetical protein | 3736699-3736824 | + | 126 |
| 14028S  | STM14_4336  | 378452460 | - | 3792675-3792815 | hypothetical protein | 3740282-3740422 | - | 141 |
| 14028S  | STM14_4339  | 378452463 | - | 3794036-3794179 | hypothetical protein | 3741643-3741786 | - | 144 |
| 14028S  | STM14_4340  | 378452464 | + | 3794140-3794265 | hypothetical protein | 3741747-3741872 | + | 126 |
| 14028S  | STM14_4343  | 378452467 | + | 3796527-3796667 | hypothetical protein | 3744134-3744274 | + | 141 |
| 14028S  | STM14_4347  | 378452471 | - | 3801111-3801227 | hypothetical protein | 3748718-3748834 | - | 117 |
| 14028S  | STM14_4350  | 378452474 | + | 3803739-3803876 | hypothetical protein | 3751346-3751483 | + | 138 |
| 14028S  | STM14_4352  | 378452476 | - | 3805315-3805461 | hypothetical protein | 3752922-3753068 | - | 147 |
| 14028S  | STM14_4354  | 378452478 | - | 3807400-3807591 | hypothetical protein | 3755007-3755198 | - | 192 |
| 14028S  | STM14_4361  | 378452485 | + | 3818231-3818344 | hypothetical protein | 3765838-3765951 | + | 114 |
| 14028S  | STM14_4366  | 378452489 | - | 3822083-3822277 | hypothetical protein | 3769690-3769884 | - | 195 |
| 14028S  | STM14_4374  | 378452497 | - | 3827982-3828101 | hypothetical protein | 3775589-3775708 | - | 120 |
| 14028S  | STM14_4378  | 378452501 | - | 3832781-3832954 | hypothetical protein | 3780388-3780561 | - | 174 |
| 14028S  | STM14_4379  | 378452502 | + | 3832815-3832976 | hypothetical protein | 3780422-3780583 | + | 162 |
| 14028S  | STM14_4388  | 378452509 | + | 3842019-3842180 | hypothetical protein | 3789626-3789787 | + | 162 |
| 14028S  | STM14_4393  | 378452514 | + | 3846344-3846445 | hypothetical protein | 3793951-3794052 | + | 102 |
| 14028S  | STM14_4395  | 378452516 | - | 3847245-3847379 | hypothetical protein | 3794852-3794986 | - | 135 |
| 14028S  | STM14_4403  | 378452524 | - | 3852193-3852324 | hypothetical protein | 3799800-3799931 | - | 132 |
| 14028S  | STM14_4408  | 378452528 | + | 3856473-3856610 | hypothetical protein | 3804080-3804217 | + | 138 |
| 14028S  | STM14_4410  | 378452530 | - | 3856798-3857019 | hypothetical protein | 3804405-3804626 | - | 222 |
| 14028S  | STM14_4415  | 378452535 | + | 3861460-3861693 | hypothetical protein | 3809067-3809300 | + | 234 |
| 14028S  | STM14_4416  | 378452536 | - | 3861562-3861738 | hypothetical protein | 3809169-3809345 | - | 177 |
| 14028S  | STM14_4419  | 378452539 | + | 3863890-3864222 | hypothetical protein | 3811497-3811829 | + | 333 |
| 14028S  | STM14_4424  | 378452544 | - | 3869165-3869311 | hypothetical protein | 3816772-3816918 | - | 147 |
| 14028S  | STM14_4437  | 378452557 | + | 3881551-3881694 | hypothetical protein | 3829158-3829301 | + | 144 |
| 14028S  | STM14_4448  | 378452568 | + | 3893735-3893932 | hypothetical protein | 3841342-3841539 | + | 198 |
| ST474   | STM474_3868 | 379702957 | - | 3911348-3911467 | hypothetical protein | 3851331-3851450 | - | 120 |

|        |                |           |   |                 |                      |                 |   |     |
|--------|----------------|-----------|---|-----------------|----------------------|-----------------|---|-----|
| 140285 | STM14_4456     | 378452576 | + | 3904878-3905129 | hypothetical protein | 3852485-3852736 | + | 252 |
| 140285 | STM14_4485     | 378452605 | - | 3932731-3932850 | hypothetical protein | 3880338-3880457 | - | 120 |
| 140285 | STM14_4497     | 378452617 | + | 3941019-3941198 | hypothetical protein | 3888626-3888805 | + | 180 |
| 140285 | STM14_4501     | 378452621 | + | 3943928-3944110 | hypothetical protein | 3891535-3891717 | + | 183 |
| 140285 | STM14_4504     | 378452624 | + | 3946552-3946725 | hypothetical protein | 3894159-3894332 | + | 174 |
| 140285 | STM14_4512     | 378452632 | - | 3954806-3954916 | hypothetical protein | 3902413-3902523 | - | 111 |
| 140285 | STM14_4518     | 378452637 | + | 3962472-3962597 | hypothetical protein | 3910079-3910204 | + | 126 |
| 140285 | STM14_4520     | 378452639 | + | 3963213-3963356 | hypothetical protein | 3910820-3910963 | + | 144 |
| 140285 | STM14_4521     | 378452640 | - | 3963387-3963497 | hypothetical protein | 3910994-3911104 | - | 111 |
| D23580 | STMMW_37441    | 378447121 | - | 3975758-3975931 | ISxac3 transposase   | 3914181-3914354 | - | 174 |
| 140285 | STM14_4531     | 378452648 | + | 3973351-3973476 | hypothetical protein | 3920958-3921083 | + | 126 |
| 140285 | STM14_0363     | 378448623 | - | 352120-352227   | hypothetical protein | 3921859-3921966 | - | 108 |
| 140285 | STM14_4535     | 378452652 | + | 3974935-3975075 | hypothetical protein | 3922542-3922682 | + | 141 |
| T00240 | STMDT12_C38190 | 378986359 | - | 3984324-3984416 | hypothetical protein | 3922727-3922819 | - | 93  |
| 140285 | STM14_4537     | 378452654 | + | 3978059-3978172 | hypothetical protein | 3925666-3925779 | + | 114 |
| 140285 | STM14_4539     | 378452656 | + | 3979055-3979171 | hypothetical protein | 3926662-3926778 | + | 117 |
| 140285 | STM14_4540     | 378452657 | - | 3979172-3979297 | hypothetical protein | 3926779-3926904 | - | 126 |
| 140285 | STM14_4549     | 378452666 | + | 3986024-3986146 | hypothetical protein | 3933631-3933753 | + | 123 |
| 140285 | STM14_4551     | 378452668 | - | 3989051-3989164 | hypothetical protein | 3936658-3936771 | - | 114 |
| 140285 | STM14_4553     | 378452670 | + | 3989514-3989657 | hypothetical protein | 3937121-3937264 | + | 144 |
| 140285 | STM14_4565     | 378452682 | - | 3999123-3999230 | hypothetical protein | 3946730-3946837 | - | 108 |
| 140285 | STM14_4567     | 378452684 | - | 3999764-3999871 | hypothetical protein | 3947371-3947478 | - | 108 |
| 140285 | STM14_4578     | 378452695 | + | 4011296-4011472 | hypothetical protein | 3958903-3959079 | + | 177 |
| 140285 | STM14_4580     | 378452697 | + | 4011519-4011680 | hypothetical protein | 3959126-3959287 | + | 162 |
| 140285 | STM14_4581     | 378452698 | - | 4011613-4011768 | hypothetical protein | 3959220-3959375 | - | 156 |
| 140285 | STM14_4582     | 378452699 | + | 4011777-4011950 | hypothetical protein | 3959384-3959557 | + | 174 |
| D23580 | STMMW_37861    | 378447163 | + | 4021208-4021303 | hypothetical protein | 3959632-3959727 | + | 96  |
| 140285 | STM14_4589     | 378452704 | - | 4016572-4016697 | hypothetical protein | 3964179-3964304 | - | 126 |
| 140285 | STM14_4595     | 378452710 | + | 4020774-4020887 | hypothetical protein | 3968381-3968494 | + | 114 |
| ST474  | STM474_3981    | 379703066 | - | 4028417-4028551 | hypothetical protein | 3968402-3968536 | - | 135 |
| 140285 | STM14_4598     | 378452712 | + | 4022921-4023073 | hypothetical protein | 3970528-3970680 | + | 153 |
| 140285 | STM14_4601     | 378452715 | + | 4024130-4024306 | hypothetical protein | 3971737-3971913 | + | 177 |
| ST474  | STM474_3986    | 379703070 | - | 4031907-4032026 | hypothetical protein | 3971892-3972011 | - | 120 |
| 140285 | STM14_4630     | 378452743 | + | 4056093-4056239 | hypothetical protein | 4003700-4003846 | + | 147 |
| 140285 | STM14_4633     | 378452746 | + | 4059079-4059237 | hypothetical protein | 4006686-4006844 | + | 159 |
| ST474  | STM474_4022    | 379703106 | - | 4071364-4071624 | hypothetical protein | 4011349-4011609 | - | 261 |
| T00240 | STMDT12_C40060 | 378986546 | - | 4156200-4156427 | hypothetical protein | 4012388-4012615 | - | 228 |
| 140285 | STM14_4658     | 378452770 | + | 4086316-4086504 | hypothetical protein | 4033923-4034111 | + | 189 |
| 140285 | STM14_4669     | 378452781 | - | 4094364-4094507 | hypothetical protein | 4041970-4042113 | - | 144 |
| 140285 | STM14_4696     | 378452801 | + | 4122161-4122346 | hypothetical protein | 4069767-4069952 | + | 186 |
| 140285 | STM14_4733     | 378452833 | + | 4155257-4155382 | hypothetical protein | 4102863-4102988 | + | 126 |
| 140285 | STM14_4738     | 378452838 | - | 4159908-4160012 | hypothetical protein | 4107514-4107618 | - | 105 |
| 140285 | STM14_4740     | 378452840 | + | 4162570-4162710 | hypothetical protein | 4110176-4110316 | + | 141 |
| 140285 | STM14_4753     | 378452852 | - | 4171444-4171629 | hypothetical protein | 4119050-4119235 | - | 186 |
| 140285 | STM14_4759     | 378452858 | - | 4175211-4175348 | hypothetical protein | 4122817-4122954 | - | 138 |
| 140285 | STM14_4768     | 378452867 | + | 4183187-4183360 | hypothetical protein | 4130793-4130966 | + | 174 |
| ST474  | STM474_4144    | 379703214 | + | 4193636-4193764 | hypothetical protein | 4133387-4133515 | + | 129 |
| 140285 | STM14_4770     | 378452869 | - | 4185870-4186004 | hypothetical protein | 4133476-4133610 | - | 135 |
| 140285 | STM14_4771     | 378452870 | + | 4185906-4186052 | hypothetical protein | 4133512-4133658 | + | 147 |
| 140285 | STM14_4784     | 378452883 | + | 4197098-4197223 | hypothetical protein | 4144704-4144829 | + | 126 |
| 140285 | STM14_4800     | 378452894 | - | 4215049-4215231 | hypothetical protein | 4162655-4162837 | - | 183 |
| 140285 | STM14_4801     | 378452895 | + | 4215077-4215433 | hypothetical protein | 4162683-4163039 | + | 357 |
| 140285 | STM14_4808     | 378452902 | - | 4219525-4219656 | hypothetical protein | 4167131-4167262 | - | 132 |
| 140285 | STM14_4811     | 378452904 | + | 4222708-4222851 | hypothetical protein | 4170314-4170457 | + | 144 |
| 140285 | STM14_4816     | 378452909 | - | 4226121-4226246 | hypothetical protein | 4173727-4173852 | - | 126 |
| 140285 | STM14_4819     | 378452912 | - | 4228860-4229039 | hypothetical protein | 4176466-4176645 | - | 180 |
| 140285 | STM14_4837     | 378452930 | - | 4248232-4248351 | hypothetical protein | 4195838-4195957 | - | 120 |
| ST474  | STM474_4210    | 379703274 | - | 4263051-4263284 | hypothetical protein | 4202802-4203035 | - | 234 |
| 140285 | STM14_4854     | 378452947 | - | 4262409-4262564 | hypothetical protein | 4210015-4210170 | - | 156 |
| 140285 | STM14_4856     | 378452949 | + | 4263770-4263904 | hypothetical protein | 4211376-4211510 | + | 135 |
| 140285 | STM14_4858     | 378452951 | + | 4265002-4265130 | hypothetical protein | 4212608-4212736 | + | 129 |
| 140285 | STM14_4867     | 378452960 | + | 4272347-4272496 | hypothetical protein | 4219953-4220102 | + | 150 |
| 140285 | STM14_4868     | 378452961 | - | 4272426-4272560 | hypothetical protein | 4220032-4220166 | - | 135 |
| 140285 | STM14_4872     | 378452965 | + | 4275521-4275652 | hypothetical protein | 4223127-4223258 | + | 132 |
| ST474  | STM474_4231    | 379703295 | + | 4283542-4283655 | hypothetical protein | 4223293-4223406 | + | 114 |
| 140285 | STM14_4873     | 378452966 | + | 4275986-4276111 | hypothetical protein | 4223592-4223717 | + | 126 |
| 140285 | STM14_4886     | 378452979 | - | 4286951-4287051 | hypothetical protein | 4234557-4234661 | - | 105 |
| 140285 | STM14_4898     | 378452991 | - | 4296957-4297091 | hypothetical protein | 4244563-4244697 | - | 135 |
| 140285 | STM14_4909     | 378453002 | - | 4305795-4305962 | hypothetical protein | 4253401-4253568 | - | 168 |
| 140285 | STM14_4914     | 378453007 | + | 4310547-4310666 | hypothetical protein | 4258153-4258272 | + | 120 |
| 140285 | STM14_4916     | 378453009 | - | 4311024-4311164 | hypothetical protein | 4258630-4258770 | - | 141 |
| ST474  | STM474_4282    | 379703346 | + | 4329998-4330159 | hypothetical protein | 4269750-4269911 | + | 162 |
| 140285 | STM14_4934     | 378453027 | - | 4332008-4332127 | hypothetical protein | 4279614-4279733 | - | 120 |
| 140285 | STM14_4938     | 378453031 | + | 4336017-4336178 | hypothetical protein | 4283623-4283784 | + | 162 |
| 140285 | STM14_4943     | 378453035 | - | 4340772-4340927 | hypothetical protein | 4288378-4288533 | - | 156 |
| 140285 | STM14_4950     | 378453042 | + | 4346732-4346872 | hypothetical protein | 4294338-4294478 | + | 141 |
| 140285 | STM14_4951     | 378453043 | + | 4346784-4346900 | hypothetical protein | 4294390-4294506 | + | 117 |
| 140285 | STM14_4953     | 378453045 | + | 4348703-4348810 | hypothetical protein | 4296309-4296416 | + | 108 |
| 140285 | STM14_4961     | 378453053 | - | 4358974-4359162 | hypothetical protein | 4306580-4306768 | - | 189 |
| 140285 | STM14_4983     | 378453065 | + | 4375382-4375510 | hypothetical protein | 4322988-4323116 | + | 129 |
| 140285 | STM14_4995     | 378453077 | + | 4388644-4388847 | hypothetical protein | 4336250-4336453 | + | 204 |
| 140285 | STM14_4997     | 378453079 | + | 4389931-4390140 | hypothetical protein | 4337537-4337746 | + | 210 |
| 140285 | STM14_5018     | 378453099 | + | 4407683-4407805 | hypothetical protein | 4355289-4355411 | + | 123 |
| 140285 | STM14_5019     | 378453100 | - | 4407796-4407918 | hypothetical protein | 4355402-4355524 | - | 123 |
| 140285 | STM14_5020     | 378453101 | + | 4407851-4407991 | hypothetical protein | 4355457-4355597 | + | 141 |
| 140285 | STM14_5025     | 378453102 | - | 4413499-4413630 | hypothetical protein | 4361105-4361236 | - | 132 |
| 140285 | STM14_5026     | 378453103 | + | 4413565-4413795 | hypothetical protein | 4361171-4361401 | + | 231 |
| 140285 | STM14_5031     | 378453108 | + | 4418519-4418641 | hypothetical protein | 4366125-4366247 | + | 123 |
| 140285 | STM14_5044     | 378453120 | + | 4431313-4431468 | hypothetical protein | 4378919-4379074 | + | 156 |
| 140285 | STM14_5053     | 378453129 | + | 4437882-4438004 | hypothetical protein | 4385488-4385610 | + | 123 |
| 140285 | STM14_5057     | 378453133 | - | 4441014-4441139 | hypothetical protein | 4388620-4388745 | - | 126 |
| 140285 | STM14_5072     | 378453147 | + | 4451435-4451575 | hypothetical protein | 4399041-4399181 | + | 141 |
| 140285 | STM14_5083     | 378453158 | - | 4462681-4462857 | hypothetical protein | 4410287-4410463 | - | 177 |

|         |                |           |   |                 |                           |                 |   |     |
|---------|----------------|-----------|---|-----------------|---------------------------|-----------------|---|-----|
| 14028S  | STM14_5084     | 378453159 | + | 4462737-4462877 | hypothetical protein      | 4410343-4410483 | + | 141 |
| 14028S  | STM14_5088     | 378453163 | + | 4466972-4467136 | hypothetical protein      | 4414578-4414742 | + | 165 |
| T000240 | STMDT12_C43680 | 378986908 | + | 4559620-4559715 | hypothetical protein      | 4415679-4415774 | + | 96  |
| 14028S  | STM14_5101     | 378453176 | + | 4478537-4478704 | hypothetical protein      | 4426143-4426310 | + | 168 |
| 14028S  | STM14_5115     | 378453190 | - | 4490374-4490565 | hypothetical protein      | 4437980-4438171 | - | 192 |
| 14028S  | STM14_5116     | 378453191 | + | 4490568-4490723 | hypothetical protein      | 4438174-4438329 | + | 156 |
| ST474   | STM474_4451    | 379703497 | + | 4498500-4498640 | hypothetical protein      | 4438355-4438495 | + | 141 |
| 14028S  | STM14_5124     | 378453199 | + | 4515420-4515557 | hypothetical protein      | 4463026-4463163 | + | 138 |
| 14028S  | STM14_5125     | 378453200 | - | 4515741-4515845 | hypothetical protein      | 4463347-4463451 | - | 105 |
| 14028S  | STM14_5129     | 378453204 | - | 4518503-4518631 | hypothetical protein      | 4466109-4466237 | - | 129 |
| 14028S  | STM14_5131     | 378453206 | - | 4519322-4519456 | hypothetical protein      | 4466928-4467062 | - | 135 |
| 14028S  | STM14_5132     | 378453207 | - | 4519489-4519611 | hypothetical protein      | 4467095-4467217 | - | 123 |
| 14028S  | STM14_5134     | 378453209 | - | 4521030-4521188 | hypothetical protein      | 4468636-4468794 | - | 159 |
| 14028S  | STM14_5149     | 378453224 | - | 4536353-4536481 | hypothetical protein      | 4483959-4484087 | - | 129 |
| 14028S  | STM14_5150     | 378453225 | + | 4536377-4536649 | hypothetical protein      | 4483983-4484255 | + | 273 |
| 14028S  | STM14_5152     | 378453227 | + | 4537849-4538022 | hypothetical protein      | 4485455-4485628 | + | 174 |
| 14028S  | STM14_5154     | 378453229 | - | 4538728-4538883 | hypothetical protein      | 4486334-4486489 | - | 156 |
| 14028S  | STM14_5160     | 378453235 | + | 4544189-4544284 | hypothetical protein      | 4491795-4491890 | + | 96  |
| 14028S  | STM14_5162     | 378453237 | + | 4546069-4546173 | hypothetical protein      | 4493675-4493779 | + | 105 |
| 14028S  | STM14_5168     | 378453243 | + | 4552110-4552238 | hypothetical protein      | 4499716-4499844 | + | 129 |
| 14028S  | STM14_5183     | 378453258 | + | 4571436-4571549 | hypothetical protein      | 4519042-4519155 | + | 114 |
| 14028S  | STM14_5189     | 378453264 | + | 4574725-4574850 | hypothetical protein      | 4522331-4522456 | + | 126 |
| SL1344  | SL1344_4256    | 378702162 | - | 4584964-4585098 | hypothetical protein      | 4524820-4524954 | - | 135 |
| ST474   | STM474_4515    | 379703561 | - | 4585588-4585743 | hypothetical protein      | 4525443-4525598 | - | 156 |
| ST474   | STM474_4516    | 379703562 | - | 4586025-4586150 | hypothetical protein      | 4525880-4526005 | - | 126 |
| 14028S  | STM14_5196     | 378453271 | - | 4579152-4579388 | hypothetical protein      | 4526758-4526994 | - | 237 |
| 14028S  | STM14_5203     | 378453277 | - | 4585245-4585367 | hypothetical protein      | 4532851-4532973 | - | 123 |
| 14028S  | STM14_5208     | 378453282 | - | 4589666-4589833 | hypothetical protein      | 4537272-4537439 | - | 168 |
| 14028S  | STM14_5211     | 378453285 | + | 4591089-4591223 | hypothetical protein      | 4538695-4538829 | + | 135 |
| 14028S  | STM14_5212     | 378453286 | - | 4591232-4591378 | hypothetical protein      | 4538838-4538984 | - | 147 |
| 14028S  | STM14_5225     | 378453299 | + | 4599983-4600087 | hypothetical protein      | 4547589-4547693 | + | 105 |
| 14028S  | STM14_5272     | 378453343 | - | 4642797-4642994 | hypothetical protein      | 4590403-4590600 | - | 198 |
| 14028S  | STM14_5273     | 378453344 | + | 4642921-4643028 | hypothetical protein      | 4590527-4590634 | + | 108 |
| 14028S  | STM14_5288     | 378453359 | - | 4654346-4654567 | hypothetical protein      | 4601952-4602173 | - | 222 |
| 14028S  | STM14_5291     | 378453362 | - | 4655902-4656081 | hypothetical protein      | 4603508-4603687 | - | 180 |
| 14028S  | STM14_5295     | 378453366 | + | 4658725-4658841 | hypothetical protein      | 4606331-4606447 | + | 117 |
| 14028S  | STM14_5303     | 378453374 | - | 4669323-4669508 | hypothetical protein      | 4616929-4617114 | - | 186 |
| 14028S  | STM14_5306     | 378453377 | + | 4671075-4671302 | hypothetical protein      | 4618681-4618908 | + | 228 |
| ST474   | STM474_4616    | 379703657 | + | 4681690-4681806 | hypothetical protein      | 4621544-4621660 | + | 117 |
| 14028S  | STM14_5315     | 378453386 | + | 4679544-4679654 | hypothetical protein      | 4627149-4627259 | + | 111 |
| ST474   | STM474_4627    | 379703668 | - | 4695124-4695237 | hypothetical protein      | 4634978-4635091 | - | 114 |
| 14028S  | STM14_5323     | 378453393 | + | 4689572-4689691 | hypothetical protein      | 4637177-4637296 | + | 120 |
| 14028S  | STM14_5344     | 378453414 | + | 4707729-4707899 | hypothetical protein      | 4655334-4655504 | + | 171 |
| 14028S  | STM14_5347     | 378453416 | + | 4711078-4711185 | hypothetical protein      | 4658683-4658790 | + | 108 |
| ST474   | STM474_4653    | 379703693 | + | 4719860-4719991 | hypothetical protein      | 4659714-4659845 | + | 132 |
| 14028S  | STM14_5356     | 378453425 | - | 4718450-4718566 | hypothetical protein      | 4666055-4666171 | - | 117 |
| T000240 | STMDT12_C45910 | 378987131 | + | 4803005-4803103 | hypothetical protein      | 4666061-4666159 | + | 99  |
| 14028S  | STM14_5359     | 378453428 | - | 4721103-4721225 | hypothetical protein      | 4668708-4668830 | - | 123 |
| 14028S  | STM14_5362     | 378453431 | + | 4723479-4723670 | hypothetical protein      | 4671084-4671275 | + | 192 |
| 14028S  | STM14_5367     | 378453436 | - | 4727023-4727145 | hypothetical protein      | 4674628-4674750 | - | 123 |
| T000240 | STMDT12_C46080 | 378987148 | + | 4822036-4822131 | hypothetical protein      | 4685092-4685187 | + | 96  |
| 14028S  | STM14_5381     | 378453450 | + | 4741810-4741944 | hypothetical protein      | 4689415-4689549 | + | 135 |
| 14028S  | STM14_5399     | 378453466 | + | 4766523-4766714 | hypothetical protein      | 4714127-4714318 | + | 192 |
| 14028S  | STM14_5402     | 378453469 | - | 4768806-4769102 | hypothetical protein      | 4716410-4716706 | - | 297 |
| 14028S  | STM14_5406     | 378453473 | + | 4772201-4772314 | hypothetical protein      | 4719805-4719918 | + | 114 |
| 14028S  | STM14_5407     | 378453474 | - | 4772241-4772357 | hypothetical protein      | 4719845-4719961 | - | 117 |
| 14028S  | STM14_5410     | 378453477 | + | 4773638-4773850 | hypothetical protein      | 4721242-4721454 | + | 213 |
| 14028S  | STM14_5413     | 378453480 | + | 4775969-4776121 | hypothetical protein      | 4723573-4723725 | + | 153 |
| 14028S  | STM14_5415     | 378453482 | + | 4776954-4777076 | hypothetical protein      | 4724558-4724680 | + | 123 |
| 14028S  | STM14_5416     | 378453483 | - | 4776976-4777107 | hypothetical protein      | 4724580-4724711 | - | 132 |
| 14028S  | STM14_5426     | 378453493 | - | 4786173-4786316 | hypothetical protein      | 4733777-4733920 | - | 144 |
| 14028S  | STM14_5427     | 378453494 | + | 4786386-4786523 | hypothetical protein      | 4733990-4734127 | + | 138 |
| 14028S  | STM14_5429     | 378453496 | - | 4787107-4787220 | hypothetical protein      | 4734711-4734824 | - | 114 |
| ST474   | STM474_4722    | 379703761 | - | 4794952-4795101 | hypothetical protein      | 4734805-4734954 | - | 150 |
| 14028S  | STM14_5435     | 378453502 | - | 4790281-4790412 | hypothetical protein      | 4737885-4738016 | - | 132 |
| 14028S  | STM14_5440     | 378453507 | + | 4798305-4798442 | hypothetical protein      | 4745909-4746046 | + | 138 |
| 14028S  | STM14_5447     | 378453514 | - | 4804689-4804838 | hypothetical protein      | 4752293-4752442 | - | 150 |
| 14028S  | STM14_5455     | 378453522 | + | 4812431-4812535 | hypothetical protein      | 4760035-4760139 | + | 105 |
| 14028S  | STM14_5462     | 378453529 | - | 4818419-4818574 | hypothetical protein      | 4766023-4766178 | - | 156 |
| 14028S  | STM14_5468     | 378453535 | + | 4823006-4823134 | hypothetical protein      | 4770610-4770738 | + | 129 |
| 14028S  | STM14_5474     | 378453538 | + | 4824998-4825105 | hypothetical protein      | 4772602-4772709 | + | 108 |
| 14028S  | STM14_5479     | 378453543 | + | 4828502-4828636 | hypothetical protein      | 4776106-4776240 | + | 135 |
| 14028S  | STM14_5486     | 378453550 | + | 4833992-4834120 | hypothetical protein      | 4781596-4781724 | + | 129 |
| 14028S  | STM14_5496     | 378453560 | + | 4843995-4844144 | hypothetical protein      | 4791599-4791748 | + | 150 |
| ST474   | smp            | 379703819 | + | 4853656-4853805 | phosphoserine phosphatase | 4793512-4793661 | + | 150 |

**Table S2.** Numbers of re-annotated genes and the range of gene-lengths for 8 Typhimurium strains.

| <b>Genomes</b> | <b># of newly annotated genes</b> | <b>Max length (bp)</b> | <b>Min length (bp)</b> | <b>Median length (bp)</b> |
|----------------|-----------------------------------|------------------------|------------------------|---------------------------|
| Tm14028S       | 114                               | 738                    | 66                     | 132                       |
| TmST4/74       | 820                               | 690                    | 66                     | 141                       |
| TmT000240      | 880                               | 606                    | 45                     | 141                       |
| TmUK1          | 910                               | 4086                   | 66                     | 138                       |
| TmLT2          | 913                               | 606                    | 66                     | 138                       |
| TmD23580       | 948                               | 1932                   | 45                     | 139.5                     |
| TmSL1344       | 965                               | 606                    | 45                     | 138                       |
| Tm798          | 1123                              | 1473                   | 45                     | 147                       |

**Table S3.** List of PFAST identified prophage regions in re-annotated Typhimurium strains. The 'intact' prophage regions are labeled as provided by PFAST, and the 'incomplete'/'questionable' regions are labeled based on their orthology among 8 Typhimurium strains.

| Salmonella enterica Typhimurium strain 798    |               |              |       |                 |               |             |
|-----------------------------------------------|---------------|--------------|-------|-----------------|---------------|-------------|
| REGION                                        | REGION LENGTH | COMPLETENESS | SCORE | REGION POSITION | GC PERCENTAGE | Region      |
| 1                                             | 6.6Kb         | incomplete   | 30    | 612708-619349   | 45.21%        | I6          |
| 2                                             | 30.1Kb        | incomplete   | 60    | 960447-990602   | 54.09%        | I1          |
| 3                                             | 45.8Kb        | intact       | 150   | 1054728-1100598 | 51.09%        | Gifsy2      |
| 4                                             | 21.2Kb        | incomplete   | 50    | 1909591-1930791 | 46.43%        | Q2          |
| 5                                             | 56.9Kb        | intact       | 150   | 2036154-2093068 | 50.44%        | ST64B       |
| 6                                             | 14.2Kb        | incomplete   | 40    | 2328041-2342297 | 47.49%        | I5          |
| 7                                             | 55.5Kb        | intact       | 150   | 2723856-2779369 | 50.73%        | Gifsy1      |
| 8                                             | 14.1Kb        | incomplete   | 10    | 2810841-2824943 | 49.18%        | I3          |
| 9                                             | 83.5Kb        | intact       | 150   | 2824596-2908177 | 51.62%        | Fels-2 like |
| 10                                            | 47.9Kb        | questionable | 70    | 2907919-2955899 | 48.01%        | Q1          |
| 11                                            | 20.4Kb        | incomplete   | 30    | 4437868-4458287 | 50.58%        | I4          |
| Salmonella enterica Typhimurium strain 140285 |               |              |       |                 |               |             |
| REGION                                        | REGION LENGTH | COMPLETENESS | SCORE | REGION POSITION | GC PERCENTAGE | Region      |
| 1                                             | 6.6Kb         | incomplete   | 30    | 613917-620558   | 45.21%        | I6          |
| 2                                             | 30.1Kb        | incomplete   | 60    | 962256-992411   | 54.09%        | I1          |
| 3                                             | 45.8Kb        | intact       | 150   | 1056538-1102365 | 51.08%        | Gifsy2      |
| 4                                             | 53.2Kb        | intact       | 150   | 1282096-1335316 | 51.60%        | Gifsy3      |
| 5                                             | 13.8Kb        | questionable | 80    | 1969279-1983175 | 46.38%        | Q2          |
| 6                                             | 56.9Kb        | intact       | 150   | 2090630-2147543 | 50.45%        | ST64B       |
| 7                                             | 14.2Kb        | incomplete   | 60    | 2382514-2396770 | 47.49%        | I5          |
| 8                                             | 55.5Kb        | intact       | 150   | 2778325-2833837 | 50.75%        | Gifsy1      |
| 9                                             | 31.3Kb        | questionable | 90    | 2920065-2951425 | 46.36%        | Q1          |
| 10                                            | 20.4Kb        | incomplete   | 30    | 4431457-4451876 | 50.57%        | I4          |
| Salmonella enterica Typhimurium strain D23580 |               |              |       |                 |               |             |
| REGION                                        | REGION LENGTH | COMPLETENESS | SCORE | REGION POSITION | GC PERCENTAGE | Region      |
| 1                                             | 41.6Kb        | intact       | 140   | 368797-410493   | 47.55%        | BTP1        |
| 2                                             | 6.6Kb         | incomplete   | 40    | 652033-658674   | 45.18%        | I6          |
| 3                                             | 46.5Kb        | intact       | 150   | 1094117-1140710 | 51.12%        | Gifsy2      |
| 4                                             | 56.9Kb        | intact       | 150   | 2062733-2119647 | 50.44%        | ST64B       |
| 5                                             | 14.2Kb        | incomplete   | 50    | 2354617-2368883 | 47.47%        | I5          |
| 6                                             | 55.5Kb        | intact       | 150   | 2751152-2806659 | 50.75%        | Gifsy1      |
| 7                                             | 31.3Kb        | questionable | 70    | 2892805-2924175 | 46.36%        | Q1          |
| 8                                             | 37.4Kb        | intact       | 107   | 3364058-3401459 | 52.65%        | BTP5        |
| 9                                             | 18.9Kb        | incomplete   | 30    | 4442090-4461045 | 51.82%        | I4          |
| Salmonella enterica Typhimurium strain LT2    |               |              |       |                 |               |             |
| REGION                                        | REGION LENGTH | COMPLETENESS | SCORE | REGION POSITION | GC PERCENTAGE | Region      |
| 1                                             | 6.6Kb         | incomplete   | 30    | 613223-619864   | 45.21%        | I6          |
| 2                                             | 41.7Kb        | intact       | 150   | 960294-1002017  | 52.63%        | Fels1       |



|    |        |              |     |                 |        |        |
|----|--------|--------------|-----|-----------------|--------|--------|
| 3  | 34.6Kb | incomplete   | 60  | 1001531-1036138 | 52.64% | I1     |
| 4  | 45.8Kb | intact       | 150 | 1098179-1144020 | 51.09% | Gifsy2 |
| 5  | 8.5Kb  | incomplete   | 50  | 1963179-1971770 | 48.98% | I2     |
| 6  | 14.2Kb | incomplete   | 60  | 2330961-2345217 | 47.49% | I5     |
| 7  | 53.2Kb | intact       | 150 | 2726772-2780003 | 51.32% | Gifsy1 |
| 8  | 38.8Kb | intact       | 150 | 2840524-2879414 | 52.86% | Fels2  |
| 9  | 31.3Kb | questionable | 70  | 2899840-2931190 | 46.36% | Q1     |
| 10 | 20.4Kb | incomplete   | 30  | 4417918-4438335 | 50.59% | I4     |

**Salmonella enterica Typhimurium strain SL1344**

| REGION | REGION LENGTH | COMPLETENESS | SCORE | REGION POSITION | GC PERCENTAGE | Region     |
|--------|---------------|--------------|-------|-----------------|---------------|------------|
| 1      | 30.1Kb        | incomplete   | 60    | 960464-990619   | 54.10%        | I1         |
| 2      | 45.5Kb        | intact       | 150   | 1054746-1100342 | 51.00%        | Gifsy2     |
| 3      | 27Kb          | incomplete   | 50    | 1905337-1932378 | 47.29%        | I2         |
| 4      | 56.9Kb        | intact       | 150   | 2036793-2093707 | 50.45%        | ST64B      |
| 5      | 14.2Kb        | incomplete   | 50    | 2328677-2342933 | 47.49%        | I5         |
| 6      | 55.9Kb        | intact       | 150   | 2724489-2780416 | 51.17%        | Gifsy1     |
| 7      | 14.1Kb        | incomplete   | 10    | 2811888-2825990 | 49.18%        | I3         |
| 8      | 62Kb          | intact       | 150   | 2838219-2900242 | 52.30%        | Fels2 like |
| 9      | 31.3Kb        | questionable | 70    | 2922406-2953766 | 46.36%        | Q1         |
| 10     | 20.4Kb        | incomplete   | 30    | 4439207-4459626 | 50.58%        | I4         |

**Salmonella enterica Typhimurium strain ST4/74**

| REGION | REGION LENGTH | COMPLETENESS | SCORE | REGION POSITION | GC PERCENTAGE | Region     |
|--------|---------------|--------------|-------|-----------------|---------------|------------|
| 1      | 6.6Kb         | incomplete   | 30    | 612711-619352   | 45.21%        | I6         |
| 2      | 30.1Kb        | incomplete   | 60    | 960464-990619   | 54.10%        | I1         |
| 3      | 43.6Kb        | intact       | 150   | 1056421-1100036 | 51.15%        | Gifsy2     |
| 4      | 13.8Kb        | questionable | 70    | 1915442-1929338 | 46.38%        | Q2         |
| 5      | 53.7Kb        | intact       | 150   | 2036793-2090551 | 50.59%        | ST64B      |
| 6      | 14.2Kb        | incomplete   | 60    | 2328677-2342933 | 47.49%        | I5         |
| 7      | 55.9Kb        | intact       | 150   | 2724489-2780416 | 51.17%        | Gifsy1     |
| 8      | 14.1Kb        | incomplete   | 10    | 2811888-2825990 | 49.18%        | I3         |
| 9      | 63.7Kb        | intact       | 150   | 2838219-2901979 | 52.29%        | Fels2 like |
| 10     | 31.3Kb        | questionable | 80    | 2922406-2953766 | 46.36%        | Q1         |
| 11     | 20.4Kb        | incomplete   | 30    | 4439208-4459627 | 50.58%        | I4         |

**Salmonella enterica Typhimurium strain T000240**

| REGION | REGION LENGTH | COMPLETENESS | SCORE | REGION POSITION | GC PERCENTAGE | Region |
|--------|---------------|--------------|-------|-----------------|---------------|--------|
| 1      | 42.5Kb        | intact       | 138   | 368827-411388   | 47.54%        | ST104  |
| 2      | 6.6Kb         | incomplete   | 40    | 651270-657911   | 45.21%        | I6     |
| 3      | 10.9Kb        | incomplete   | 50    | 1013518-1024428 | 52.24%        | I1     |
| 4      | 45.8Kb        | intact       | 150   | 1095837-1141705 | 51.10%        | Gifsy2 |
| 5      | 12.1Kb        | questionable | 70    | 1955180-1967311 | 47.01%        | Q2     |
| 6      | 53.2Kb        | intact       | 150   | 2722198-2775404 | 51.33%        | Gifsy1 |

| 7                                                        | 26.5Kb               | questionable        | 90           | 2804985-2831512        | 51.52%               | Q3            |
|----------------------------------------------------------|----------------------|---------------------|--------------|------------------------|----------------------|---------------|
| 8                                                        | 38.8Kb               | intact              | 150          | 2864091-2902980        | 52.85%               | Fels2         |
| 9                                                        | 20.4Kb               | incomplete          | 30           | 4523004-4543423        | 50.59%               | I4            |
| <b><i>Salmonella enterica</i> Typhimurium strain UK1</b> |                      |                     |              |                        |                      |               |
| <b>REGION</b>                                            | <b>REGION LENGTH</b> | <b>COMPLETENESS</b> | <b>SCORE</b> | <b>REGION POSITION</b> | <b>GC PERCENTAGE</b> | <b>Region</b> |
| 1                                                        | 6.6Kb                | incomplete          | 40           | 613917-620557          | 45.20%               | I6            |
| 2                                                        | 30.1Kb               | incomplete          | 60           | 961545-991701          | 54.09%               | I1            |
| 3                                                        | 45.8Kb               | intact              | 150          | 1055828-1101655        | 51.09%               | Gifsy2        |
| 4                                                        | 13.9Kb               | questionable        | 70           | 1917431-1931366        | 46.39%               | Q2            |
| 5                                                        | 56.9Kb               | intact              | 150          | 2038822-2095736        | 50.44%               | ST64B         |
| 6                                                        | 14.2Kb               | incomplete          | 60           | 2330706-2344962        | 47.50%               | I5            |
| 7                                                        | 55.5Kb               | intact              | 150          | 2726536-2782089        | 51.02%               | Gifsy1        |
| 8                                                        | 31.3Kb               | questionable        | 90           | 2868318-2899678        | 46.36%               | Q1            |
| 9                                                        | 20.4Kb               | incomplete          | 30           | 4379063-4399482        | 50.57%               | I4            |

**Table S4.** List of 51 mosaic genes identified in 8 Typhimurium strains. The mosaic gene clusters which were deleted from 1 or 2 strains are marked.

| Reference Genome | Gene Name    | GI        | Strand | CDS-region        | Product                                                               | Protein length | Region                              | Absent from Strain(s) | Note                                                                                                                                                                                                      |
|------------------|--------------|-----------|--------|-------------------|-----------------------------------------------------------------------|----------------|-------------------------------------|-----------------------|-----------------------------------------------------------------------------------------------------------------------------------------------------------------------------------------------------------|
| 140285           | STM14_0340   | 378448603 | +      | 333236-337330     | putative RHS-like protein                                             | 1364           | 51474.5L1344.798                    |                       |                                                                                                                                                                                                           |
| ST474            | rhlA         | 379699507 | +      | 332521-336123     | rhlA protein                                                          | 1200           | T000240                             | 140285,LT2,D23580,UK1 | Both are same gene, 488bp deleted from middle from smaller gene (rhlA)                                                                                                                                    |
| 140285           | stbB         | 378448652 | -      | 384271-385032     | putative fimbrial chaperone                                           | 253            | T000240                             |                       |                                                                                                                                                                                                           |
| 140285           | stbA         | 378448653 | -      | 385094-385630     | putative fimbrial major subunit                                       | 178            | T000240                             |                       |                                                                                                                                                                                                           |
| 140285           | STM14_0397   | 378448654 | -      | 385733-385843     | hypothetical protein                                                  | 36             | del_1 T000240                       |                       |                                                                                                                                                                                                           |
| 140285           | STM14_0398   | 378448655 | +      | 386264-387028     | putative inner membrane protein                                       | 254            | T000240                             |                       |                                                                                                                                                                                                           |
| 140285           | STM14_0399   | 378448656 | +      | 387001-387501     | hypothetical protein                                                  | 166            | T000240                             |                       |                                                                                                                                                                                                           |
| 140285           | STM14_0400   | 378448657 | +      | 387801-389375     | hypothetical protein                                                  | 524            | T000240                             |                       |                                                                                                                                                                                                           |
| 140285           | allP         | 410023158 | +      | 583119-584573     | allantoin permease                                                    | 484            | del_4 D23580                        |                       |                                                                                                                                                                                                           |
| 140285           | allS         | 378448869 | +      | 584652-586013     | allantoinase                                                          | 459            | D23580                              |                       |                                                                                                                                                                                                           |
| 140285           | STM14_0711   | 378448960 | +      | 676674-677033     | molibdopterin-containing oxidoreductase iron-sulfur subunit           | 119            | 51474.5L1344.798,T000240,D23580,LT2 |                       | Both are same gene, 198bp deleted in middle from small one (STM14_0711)                                                                                                                                   |
| D23580           | STMWW_06771  | 378444106 | +      | 714790-715347     | molibdopterin-containing oxidoreductase iron-sulfur subunit           | 185            | 140285,UK1                          |                       |                                                                                                                                                                                                           |
| 140285           | ripA         | 378448995 | -      | 700248-701393     | rare lipoprotein A                                                    | 381            | 51474.5L1344.798                    |                       | Both are same gene, 788bp deleted in middle from small one (ripA of ST474)                                                                                                                                |
| ST474            | ripA         | 379699856 | -      | 699240-700307     | rare lipoprotein A                                                    | 355            | T000240,D23580,LT2,D23580,UK1       |                       |                                                                                                                                                                                                           |
| 140285           | mdhA         | 378449257 | +      | 946813-947555     | nitroreductase A                                                      | 240            | T000240                             |                       | This gene is disrupted by 768 bp IS3 transposases in T000240 leading to generate two truncated ORFs STM14_039300 and STM14_039330                                                                         |
| 140285           | orfX         | 378449467 | +      | 1138959-1138962   | putative cytoplasmic protein                                          | 56             | D23580                              |                       |                                                                                                                                                                                                           |
| 140285           | STM14_1239   | 378449468 | -      | 1138763-1138873   | putative cytoplasmic protein                                          | 36             | del_5 D23580                        |                       |                                                                                                                                                                                                           |
| 140285           | pipD         | 378449469 | -      | 1138982-1140544   | pathogenicity island-encoded protein D                                | 520            | D23580                              |                       |                                                                                                                                                                                                           |
| 140285           | STM14_1756   | 378449969 | +      | 1541546-1543753   | electron transport complex protein RnfC                               | 735            | 798                                 |                       | Partially deleted/frameshift at the end part of same annotated (RnfC) gene is present in 798 as unique one                                                                                                |
| 140285           | STM14_1868   | 378450077 | +      | 1634851-1635930   | putative S-adenosylmethionine/80kDa-vibriovibryltransferase-isomerase | 359            | D23580                              |                       |                                                                                                                                                                                                           |
| 140285           | STM14_1869   | 378450078 | -      | 1635982-1636371   | putative translation initiation inhibitor                             | 129            | D23580                              |                       |                                                                                                                                                                                                           |
| 140285           | STM14_1870   | 378450079 | -      | 1636542-1636826   | putative cytoplasmic protein                                          | 94             | D23580                              |                       |                                                                                                                                                                                                           |
| 140285           | STM14_1871   | 378450080 | -      | 1636816-1637064   | putative cytoplasmic protein                                          | 82             | del_6 D23580                        |                       |                                                                                                                                                                                                           |
| 140285           | STM14_1872   | 378450081 | +      | 1637216-1637431   | putative phage-related secreted protein                               | 71             | D23580                              |                       |                                                                                                                                                                                                           |
| 140285           | STM14_1873   | 378450082 | +      | 1637421-1637753   | hypothetical protein                                                  | 110            | D23580                              |                       |                                                                                                                                                                                                           |
| 140285           | STM14_1874   | 378450083 | +      | 1637896-1638804   | putative cytoplasmic protein                                          | 302            | D23580                              |                       |                                                                                                                                                                                                           |
| 140285           | Re-annotated | -         | +      | 1638857-1639249   | hypothetical protein                                                  | 130            | D23580                              |                       |                                                                                                                                                                                                           |
| 140285           | STM14_3267   | 378451427 | +      | 2861933-2862097   | hypothetical protein                                                  | 54             | T000240                             |                       | This gene is disrupted by a unique hypothetical protein (STM14_039300) followed by a questionable phase region (q3) predicted by PHAST, this hypothetical protein may be also a part of this phase region |
| 140285           | ymmM         | 378451797 | +      | 3203985-3204834   | nickel/cobalt efflux protein YmmA                                     | 302            | D23580,51474.5L1344.798             |                       | 78bp deleted in middle from small one Re-annotated in D23580 (13 repeats of CGACCA)                                                                                                                       |
| D23580           | Re-annotated | -         | +      | 31276184-31277014 | putative High affinity Nickel transport protein                       | 276            | 140285,UK1,T000240                  |                       |                                                                                                                                                                                                           |
| 140285           | Re-annotated | -         | +      | 3265788-3265904   | putative racemase                                                     | 38             | T000240,LT2                         |                       | 18bp duplication present in T000240 and LT2 (2 repeat regions of ATGCTCGCATGCTCGG) and annotated to be starting from different location                                                                   |
| LT2              | Re-annotated | -         | +      | 3246679-3246783   | hypothetical protein                                                  | 34             | 140285,UK1,51474.5L1344.798,D23580  |                       |                                                                                                                                                                                                           |
| 140285           | bigA         | 378452314 | +      | 3643029-3648923   | putative surface-exposed virulence protein                            | 1964           | 798                                 |                       | Annotated as pseudogene in 798                                                                                                                                                                            |
| 140285           | STM14_4330   | 378452454 | -      | 3786168-3787013   | putative sugar kinase                                                 | 281            | T000240                             |                       |                                                                                                                                                                                                           |
| 140285           | STM14_4331   | 378452455 | -      | 3787077-3788054   | putative phosphoglycerate isomerase                                   | 325            | T000240                             |                       |                                                                                                                                                                                                           |
| 140285           | STM14_4564   | 378452681 | -      | 3998131-3998874   | putative regulatory protein                                           | 247            | T000240                             |                       | Disrupted in two truncated genes STM14_039440 and STM14_039420 in T000240 due to the insertion of DT12 genomic island                                                                                     |
| 140285           | STM14_4876   | 378452969 | -      | 4278277-4278792   | putative C4-dicarboxylate transport system                            | 171            | 798                                 |                       | 43 bp deletion in 798, annotated as small truncated protein in 798 and that is found as core                                                                                                              |
| 140285           | adiY         | 378453242 | -      | 4551180-4551941   | transcriptional activator                                             | 253            | T000240                             |                       |                                                                                                                                                                                                           |
| 140285           | STM14_5168   | 378453243 | +      | 4552110-4552238   | hypothetical protein                                                  | 42             | T000240                             |                       |                                                                                                                                                                                                           |
| 140285           | adi          | 378453244 | -      | 4552239-4554509   | catabolic arginine decarboxylase                                      | 756            | T000240                             |                       |                                                                                                                                                                                                           |
| 140285           | meIR         | 410023222 | -      | 4554739-4555671   | DNA-binding transcriptional regulator MeIR                            | 310            | del_3 T000240                       |                       |                                                                                                                                                                                                           |
| 140285           | meIA         | 378453246 | +      | 4555940-4557295   | alpha-galactosidase                                                   | 451            | T000240                             |                       |                                                                                                                                                                                                           |
| 140285           | meIB         | 378453247 | +      | 4557370-4558809   | melibiose/sodium symporter                                            | 476            | T000240                             |                       |                                                                                                                                                                                                           |
| 140285           | fumB         | 378453248 | -      | 4558907-4560553   | fumarate B                                                            | 548            | T000240                             |                       |                                                                                                                                                                                                           |
| D23580           | STMWW_30741  | 378446465 | +      | 3262696-3263952   | nucleoside permease nupg (nucleoside-transport system protein)        | 418            | 140285,UK1                          |                       | 869bp deleted from 140285 and UK1 leading to a pseudo gene                                                                                                                                                |
| D23580           | STMWW_32551  | 378446642 | +      | 3446835-3448262   | PTS system fructose-specific EIIBC component                          | 475            | 140285,UK1                          |                       |                                                                                                                                                                                                           |
| D23580           | STMWW_32561  | 378446643 | +      | 3448249-3449055   | PTS-transport family phosphoryl transfer protein                      | 268            | 140285,UK1                          |                       |                                                                                                                                                                                                           |
| D23580           | STMWW_32571  | 378446644 | +      | 3449253-3450524   | putative sugar kinase                                                 | 423            | 140285,UK1                          |                       |                                                                                                                                                                                                           |
| D23580           | STMWW_32581  | 378446645 | +      | 3450539-3451003   | PTS system galactitol-specific transporter subunit IIA                | 154            | del_7 140285,UK1                    |                       |                                                                                                                                                                                                           |
| D23580           | STMWW_32591  | 378446646 | +      | 3451034-3451318   | PTS system galactitol-specific transporter subunit IIB                | 94             | 140285,UK1                          |                       |                                                                                                                                                                                                           |
| D23580           | STMWW_32601  | 378446647 | +      | 3451322-3452695   | PTS system galactitol-specific transporter subunit IIC                | 457            | 140285,UK1                          |                       |                                                                                                                                                                                                           |

**Table S5.** List of 12 additional Typhimurium strains analyzed in our study.

| Organism Name                                          | Strain               | CladeID | BioSample    | BioProject  |
|--------------------------------------------------------|----------------------|---------|--------------|-------------|
| Salmonella entericasubsp. enterica serovar Typhimurium | U288                 | 19669   | SAMN02604233 | PRJNA157919 |
| Salmonella entericasubsp. enterica serovar Typhimurium | CFSAN001921          | 19669   | SAMN01832087 | PRJNA184140 |
| Salmonella entericasubsp. enterica serovar Typhimurium | DT2                  | 19669   | SAMEA2272227 | PRJEB4149   |
| Salmonella entericasubsp. enterica serovar Typhimurium | DT104                | 19669   | SAMEA2272504 | PRJEB1666   |
| Salmonella entericasubsp. enterica serovar Typhimurium | 138736               | 19669   | SAMN02692256 | PRJNA242139 |
| Salmonella entericasubsp. enterica serovar Typhimurium | VNP20009             | 19669   | SAMN02798502 | PRJNA242737 |
| Salmonella entericasubsp. enterica serovar Typhimurium | ATCC 13311           | 19669   | SAMN02943517 | PRJNA256479 |
| Salmonella entericasubsp. enterica serovar Typhimurium | L-3553               | 19669   | -            | PRJDA63645  |
| Salmonella entericasubsp. enterica serovar Typhimurium | USDA-ARS-USMARC-1899 | 19669   | SAMN02712198 | PRJNA236708 |
| Salmonella entericasubsp. enterica serovar Typhimurium | CDC 2011K-0870       | 19669   | SAMN02712200 | PRJNA236711 |
| Salmonella entericasubsp. enterica serovar Typhimurium | 33676                | 19669   | SAMN03795193 | PRJNA288148 |
| Salmonella entericasubsp. enterica                     | YU39                 | 19669   | SAMN03653812 | PRJNA271539 |

**Table S6.** Functional classification analysis of the genes in strain T000240-specific genomic island GI-DT12, based on different Gene Ontology (GO) categories using DAVID online software. The p-values below 0.5 are shown in red to designate the corresponding functional clusters as enriched (or overrepresented) in the genes of this island.

| GO classification                                                | Functional classes                                  | # of genes                                     | Enrichment score p-value |
|------------------------------------------------------------------|-----------------------------------------------------|------------------------------------------------|--------------------------|
| Biological process                                               | response to mercury ion                             | 2                                              | 0                        |
|                                                                  | transposition, DNA-mediated                         | 9                                              | 2.86495E-11              |
|                                                                  | DNA integration                                     | 6                                              | 1.137E-06                |
|                                                                  | siderophore biosynthetic process                    | 2                                              | 6.79725E-05              |
|                                                                  | response to antibiotic                              | 4                                              | 7.6933E-05               |
|                                                                  | metal ion transport                                 | 2                                              | 0.001030659              |
|                                                                  | negative regulation of transcription, DNA-templated | 2                                              | 0.01946015               |
|                                                                  | DNA recombination                                   | 2                                              | 0.04665809               |
|                                                                  | transport                                           | 3                                              | 0.05398292               |
|                                                                  | regulation of transcription, DNA-templated          | 5                                              | 0.06052506               |
|                                                                  | transcription, DNA-templated                        | 3                                              | 0.1274072                |
|                                                                  | transmembrane transport                             | 2                                              | 0.2993324                |
|                                                                  | Molecular function                                  | mercury ion transmembrane transporter activity | 3                        |
| mercury ion binding                                              |                                                     | 3                                              | 0                        |
| transposase activity                                             |                                                     | 7                                              | 9.12138E-10              |
| siderophore transmembrane transporter activity                   |                                                     | 3                                              | 1.53037E-05              |
| ATPase activity, coupled to transmembrane movement of substances |                                                     | 2                                              | 0.00627801               |
| N-acetyltransferase activity                                     |                                                     | 2                                              | 0.01461433               |
| DNA binding                                                      |                                                     | 15                                             | 0.02293418               |
| oxidoreductase activity                                          |                                                     | 4                                              | 0.034507                 |
| nucleic acid binding                                             |                                                     | 3                                              | 0.04967318               |
| sequence-specific DNA binding transcription factor activity      |                                                     | 1                                              | 0.05151002               |
| ATPase activity                                                  |                                                     | 3                                              | 0.06561876               |
| ATP binding                                                      |                                                     | 7                                              | 0.08668284               |
| metal ion binding                                                |                                                     | 2                                              | 0.1283472                |
| transporter activity                                             |                                                     | 1                                              | 0.2165272                |
| magnesium ion binding                                            |                                                     | 2                                              | 0.3132017                |
| zinc ion binding                                                 |                                                     | 2                                              | 0.3922711                |
| iron ion binding                                                 |                                                     | 1                                              | 0.5392793                |
| flavin adenine dinucleotide binding                              |                                                     | 1                                              | 0.6550501                |
| Cellular components                                              | plasma membrane                                     | 5                                              | 0.2106683                |
|                                                                  | integral component of membrane                      | 11                                             | 0.2604585                |
|                                                                  | membrane                                            | 2                                              | 0.3551638                |
|                                                                  | cell outer membrane                                 | 1                                              | 0.5655445                |
|                                                                  | periplasmic space                                   | 1                                              | 0.6621441                |
|                                                                  | integral component of plasma membrane               | 1                                              | 0.6763958                |

Significantly changed GO groups are in red color (p-value < 0.05)
